# Supplementary material for: Storage Protein-Mediated Translation Control Links Juvenile Diet to Longevity in Drosophila
Source: Research Square preprint supplement (doi:10.21203/rs.3.rs-6791339/v1), 2025-07-15
Supplement: Supplementary file 1 [file 48dc6c72e19e633812ff2677.xlsx]

## Sheet: pSILAC (Fig.2a)
Protein IDs	Majority protein IDs	Protein names	Gene names	Fasta headers	iBAQ L day16_abdomen_rep1	iBAQ M day16_abdomen_rep1	iBAQ H day16_abdomen_rep1	iBAQ L day16_abdomen_rep2	iBAQ M day16_abdomen_rep2	iBAQ H day16_abdomen_rep2	iBAQ L day16_abdomen_rep3	iBAQ M day16_abdomen_rep3	iBAQ H day16_abdomen_rep3	iBAQ L day16_head_rep1	iBAQ M day16_head_rep1	iBAQ H day16_head_rep1	iBAQ L day16_head_rep2	iBAQ M day16_head_rep2	iBAQ H day16_head_rep2	iBAQ L day16_head_rep3	iBAQ M day16_head_rep3	iBAQ H day16_head_rep3	iBAQ L day6_head_rep1	iBAQ M day6_head_rep1	iBAQ H day6_head_rep1	iBAQ L day6_head_rep2	iBAQ M day6_head_rep2	iBAQ H day6_head_rep2	iBAQ L day6_head_rep3	iBAQ M day6_head_rep3	iBAQ H day6_head_rep3	Ratio M/L day16_abdomen_rep1	Ratio M/L day16_abdomen_rep2	Ratio M/L day16_abdomen_rep3	Ratio M/L day16_head_rep1	Ratio M/L day16_head_rep2	Ratio M/L day16_head_rep3	Ratio M/L day6_head_rep1	Ratio M/L day6_head_rep2	Ratio M/L day6_head_rep3	Ratio H/L day16_abdomen_rep1	Ratio H/L day16_abdomen_rep2	Ratio H/L day16_abdomen_rep3	Ratio H/L day16_head_rep1	Ratio H/L day16_head_rep2	Ratio H/L day16_head_rep3	Ratio H/L day6_head_rep1	Ratio H/L day6_head_rep2	Ratio H/L day6_head_rep3
P00334	P00334	Alcohol dehydrogenase	Adh	sp|P00334|ADH_DROME Alcohol dehydrogenase OS=Drosophila melanogaster OX=7227 GN=Adh PE=1 SV=2	15556000000	19423000000	3.6345e+09	14643000000	22717000000	3.2862e+09	11341000000	16074000000	2701700000	7.9784e+09	10722000000	2544800000	6.4635e+09	9223000000	2370500000	952590000	1.0725e+09	340030000	2.0149e+09	9189400000	6.1671e+09	1.4589e+09	7.5352e+09	5064400000	2.0423e+09	13098000000	7.893e+09	1.2462	1.4291	1.3155	1.3925	1.2874	1.2402	4.5776	5.3401	6.1855	0.22847	0.20322	0.22503	0.30733	0.31707	0.36153	2.7393	2.9937	3.3688
Q95RB2	Q95RB2		Cpr49Ae	tr|Q95RB2|Q95RB2_DROME Cuticular protein 49Ae OS=Drosophila melanogaster OX=7227 GN=Cpr49Ae PE=1 SV=1	900520000	343940000	4874200000	1.8775e+09	437250000	10020000000	3.3886e+09	582550000	17723000000	226790000	37631000	3.8817e+09	184700000	32413000	2.9938e+09	189800000	43952000	4805600000	130460000	78455000	5330000000	20968000	15867000	949850000	25646000	16407000	1251000000	0.73828	0.84478	0.099629	0.19842	0.15749	0.62711	0.68288	0.78668	0.76253	6.5735	7.4897	5.5492	14.732	14.938	23.221	51.147	40.482	29.184
P53501	P53501	Actin-57B	Act57B	sp|P53501|ACT3_DROME Actin-57B OS=Drosophila melanogaster OX=7227 GN=Act57B PE=1 SV=1	1.7138e+09	358560000	3.6201e+09	1252800000	259730000	2875500000	2219900000	398800000	4502700000	964780000	181590000	5327600000	1.4604e+09	287230000	6.8299e+09	177420000	34144000	899080000	383070000	216880000	4.2823e+09	281110000	169820000	3.6232e+09	358100000	233350000	5229600000	0.22934	0.24712	0.2138	0.21946	0.24836	0.25191	0.49899	0.71033	0.78727	2.1228	2.0118	1.9471	4.7147	4.5454	4.7462	10.962	12.164	13.253
A0A0B4LHS1;P06742;P06742-2	A0A0B4LHS1;P06742;P06742-2	Myosin light chain alkali	Mlc1	tr|A0A0B4LHS1|A0A0B4LHS1_DROME Myosin light chain alkali OS=Drosophila melanogaster OX=7227 GN=Mlc1 PE=1 SV=1;sp|P06742|MLC1_DROME Myosin light chain alkali OS=Drosophila melanogaster OX=7227 GN=Mlc1 PE=1 SV=4;sp|P06742-2|MLC1_DROME Isoform Indirect flight	871210000	110060000	2780000000	1.0485e+09	131590000	3.7892e+09	541140000	55904000	1.6199e+09	862960000	77274000	5307200000	811520000	70484000	4719300000	210180000	15101000	1411400000	421170000	103010000	3.7443e+09	328940000	67602000	3.4044e+09	547620000	183340000	6.6863e+09	0.14014	0.13668	0.12907	0.093456	0.12146	0.078203	0.26776	0.24267	0.32708	3.2837	3.0932	2.658	5.2494	5.5948	6.508	8.6296	9.0109	11.284
A0A0B4KFZ9;P84040	A0A0B4KFZ9;P84040	Histone H4	His4r;His4	tr|A0A0B4KFZ9|A0A0B4KFZ9_DROME Histone H4 OS=Drosophila melanogaster OX=7227 GN=His4r PE=1 SV=1;sp|P84040|H4_DROME Histone H4 OS=Drosophila melanogaster OX=7227 GN=His4 PE=1 SV=2	385130000	180830000	1.7636e+09	554050000	302200000	2373700000	415720000	281410000	2.0485e+09	512300000	259690000	4.2426e+09	529550000	196110000	4306200000	65197000	18884000	567040000	237400000	168190000	3.6117e+09	179230000	183450000	3.7108e+09	339290000	314520000	6.3811e+09	0.47335	0.45986	0.47589	0.35384	0.3857	0.3243	0.96174	1.1966	1.0926	4.5821	3.9369	4.2111	7.9402	7.2714	8.5895	18.937	20.17	19.81
A8JNP1;P48610;A8JNP2;P48610-4;P48610-3;P48610-2	A8JNP1;P48610;A8JNP2;P48610-4;P48610-3;P48610-2	Arginine kinase	Argk	tr|A8JNP1|A8JNP1_DROME arginine kinase OS=Drosophila melanogaster OX=7227 GN=Argk1 PE=1 SV=2;sp|P48610|KARG_DROME Arginine kinase 1 OS=Drosophila melanogaster OX=7227 GN=Argk1 PE=2 SV=2;tr|A8JNP2|A8JNP2_DROME arginine kinase OS=Drosophila melanogaster OX=7	493430000	189160000	699270000	532110000	202590000	730870000	471310000	175030000	658170000	2.0497e+09	540090000	2599000000	2456300000	574610000	3.1468e+09	236750000	52691000	322190000	505790000	587630000	2660300000	333300000	422970000	2.0296e+09	470070000	628410000	3.0504e+09	0.29294	0.26287	0.27891	0.1823	0.18924	0.20371	1.046	1.0991	1.1202	1.1369	1.1867	1.1062	1.272	1.2006	1.262	4.6031	5.2693	5.7457
Q9VGM2;Q8INK3;Q8INK2	Q9VGM2;Q8INK3;Q8INK2		fabp	tr|Q9VGM2|Q9VGM2_DROME Fatty acid binding protein, isoform B OS=Drosophila melanogaster OX=7227 GN=fabp PE=1 SV=1;tr|Q8INK3|Q8INK3_DROME Fatty acid binding protein, isoform C OS=Drosophila melanogaster OX=7227 GN=fabp PE=1 SV=1;tr|Q8INK2|Q8INK2_DROME Fatty	1.7365e+09	2.0413e+09	406790000	1.4774e+09	2352700000	337420000	1.8121e+09	2314300000	375830000	1.9307e+09	887440000	1251200000	1.8946e+09	918270000	1435000000	950970000	380390000	675120000	463600000	1112000000	2560300000	334770000	836110000	1.9102e+09	398880000	1110200000	2486000000	1.1555	1.2687	1.1617	0.44229	0.45551	0.40233	2.0793	2.4411	2.6407	0.21601	0.20735	0.18829	0.62939	0.67735	0.66112	4.564	5.2031	5.5811
X2JB48;Q26365-2;Q26365	X2JB48;Q26365-2;Q26365	ADP,ATP carrier protein	sesB	tr|X2JB48|X2JB48_DROME ADP/ATP translocase OS=Drosophila melanogaster OX=7227 GN=sesB PE=1 SV=1;sp|Q26365-2|ADT_DROME Isoform A of ADP,ATP carrier protein OS=Drosophila melanogaster OX=7227 GN=sesB;sp|Q26365|ADT_DROME ADP,ATP carrier protein OS=Drosophila	1425800000	1074300000	608910000	1.9047e+09	1425000000	700500000	1.8984e+09	1372300000	667190000	1428500000	672320000	3.1671e+09	1249700000	460710000	2.9388e+09	102520000	52916000	264580000	342950000	396370000	2384500000	277200000	359810000	2181600000	445810000	890320000	3.9269e+09	0.81906	0.81911	0.83077	0.41461	0.37699	0.40327	1.258	1.3434	1.5524	0.4018	0.36902	0.36313	2.005	2.0528	2.3693	6.9958	7.6034	7.5604
P35381	P35381	ATP synthase subunit alpha, mitochondrial	blw	sp|P35381|ATPA_DROME ATP synthase subunit alpha, mitochondrial OS=Drosophila melanogaster OX=7227 GN=blw PE=1 SV=2	1.5606e+09	1173700000	676610000	1.781e+09	1.4608e+09	822880000	1442600000	1109900000	614650000	1102700000	538070000	2411100000	1130100000	537140000	2484500000	102370000	51183000	255740000	337430000	496430000	2318000000	272820000	475030000	2180100000	331450000	569760000	2669000000	0.78998	0.81955	0.82431	0.47164	0.44795	0.49179	1.6607	1.7687	1.9159	0.38964	0.38306	0.39563	1.8548	1.9142	2.1129	6.3523	7.1636	7.4381
P02283	P02283	Histone H2B	His2B	sp|P02283|H2B_DROME Histone H2B OS=Drosophila melanogaster OX=7227 GN=His2B PE=1 SV=2	284340000	101460000	805830000	351220000	118240000	1.0027e+09	274620000	96297000	884860000	305460000	87772000	2156300000	307290000	84341000	1.9867e+09	78065000	24060000	562230000	107170000	98093000	2254400000	126190000	124690000	2872500000	128420000	130590000	2.9658e+09	0.37647	0.48984	0.38942	0.34361	0.28373	0.31413	1.0872	1.0556	1.0929	2.8138	3.6076	2.922	6.9418	6.4973	7.2602	26.218	18.078	23.477
X2JH42;L0MQ04;Q05825;Q8T4C4	X2JH42;L0MQ04;Q05825	ATP synthase subunit beta;ATP synthase subunit beta, mitochondrial	ATPsynbeta;ATPsyn-beta	tr|X2JH42|X2JH42_DROME ATP synthase subunit beta OS=Drosophila melanogaster OX=7227 GN=ATPsynbeta PE=1 SV=1;tr|L0MQ04|L0MQ04_DROME ATP synthase subunit beta OS=Drosophila melanogaster OX=7227 GN=ATPsynbeta PE=1 SV=1;sp|Q05825|ATPB_DROME ATP synthase subuni	2.0371e+09	1.5893e+09	896190000	2376300000	1.9616e+09	965770000	1.7565e+09	1406700000	784900000	1321500000	622650000	2793800000	1427400000	694720000	3.0441e+09	109540000	55594000	255040000	247670000	396160000	1.7983e+09	307130000	512560000	2349300000	265130000	522720000	2.0996e+09	0.79712	0.83403	0.8115	0.47877	0.49447	0.511	1.6641	1.8228	1.9585	0.38586	0.36371	0.36303	1.7731	1.8136	1.9466	6.3288	6.9668	6.728
M9PD75;Q94920	M9PD75;Q94920	Voltage-dependent anion-selective channel	porin	tr|M9PD75|M9PD75_DROME Porin, isoform D OS=Drosophila melanogaster OX=7227 GN=porin PE=3 SV=1;sp|Q94920|VDAC_DROME Voltage-dependent anion-selective channel OS=Drosophila melanogaster OX=7227 GN=porin PE=1 SV=3	799150000	886470000	308570000	716510000	769370000	262280000	718850000	772310000	260370000	732270000	380190000	1.8736e+09	690980000	326750000	1.6752e+09	57378000	29100000	159700000	186890000	310390000	1.7207e+09	146140000	236760000	1.481e+09	221300000	481140000	2563800000	1.0621	1.031	1.1234	0.51907	0.48188	0.52121	1.6462	2.0184	2.2052	0.36392	0.36246	0.35693	2.1203	2.248	2.6268	9.0548	9.8778	11.287
P29310-2	P29310-2	14-3-3 protein zeta	14-3-3zeta	sp|P29310-2|1433Z_DROME Isoform VI of 14-3-3 protein zeta OS=Drosophila melanogaster OX=7227 GN=14-3-3zeta	708020000	708270000	233300000	512050000	548740000	158440000	561720000	567640000	156500000	746760000	390230000	1.0305e+09	730780000	384420000	945380000	109340000	58903000	131450000	217140000	478130000	1.4911e+09	128910000	294390000	1.0086e+09	159870000	405430000	1248400000	1.084	1.2987	1.1683	0.51146	0.52649	0.55645	2.5821	2.5732	2.8346	0.29723	0.30447	0.25177	0.97591	0.97453	1.0349	6.2524	5.8617	7.1988
P13607-5;E1JIR4;P13607-4;P13607;A0A0B4KGG8;P13607-7;P13607-6;P13607-2;P13607-3;A8QI34	P13607-5;E1JIR4;P13607-4;P13607;A0A0B4KGG8;P13607-7;P13607-6;P13607-2;P13607-3	Sodium/potassium-transporting ATPase subunit alpha	Atpalpha	sp|P13607-5|ATNA_DROME Isoform 5 of Sodium/potassium-transporting ATPase subunit alpha OS=Drosophila melanogaster OX=7227 GN=Atpalpha;tr|E1JIR4|E1JIR4_DROME Sodium/potassium-transporting ATPase subunit alpha OS=Drosophila melanogaster OX=7227 GN=Atpalpha P	6732700	4576200	6295300	5962700	4652400	5325300	4222800	3703000	5111100	651130000	147660000	1.9659e+09	643000000	146690000	1.8943e+09	38035000	10948000	120660000	119460000	141920000	1381400000	85485000	109260000	1.0343e+09	108110000	151570000	1.466e+09	0.61415	0.75242	0.80299	0.20331	0.19831	0.19589	1.1125	1.2167	1.3469	0.98877	0.63299	1.0235	3.0503	2.8879	3.1119	11.117	10.498	12.674
Q9VV36	Q9VV36		retinin	sp|Q9VV36|RETIN_DROME Retinin OS=Drosophila melanogaster OX=7227 GN=retinin PE=1 SV=2	0	0	0	23742000	4547500	35049000	0	0	0	510600000	154080000	602090000	409040000	158050000	422250000	211880000	88247000	256230000	439820000	538400000	1258000000	318960000	497570000	996000000	253120000	465910000	819140000	NaN	0.25366	NaN	0.31199	0.38911	0.36896	1.1933	1.5769	2.0202	NaN	1.4479	NaN	1.0604	1.0906	1.0692	2.6435	2.9328	3.1245
Q9VEB1	Q9VEB1		Mdh2	tr|Q9VEB1|Q9VEB1_DROME Malate dehydrogenase, mitochondrial OS=Drosophila melanogaster OX=7227 GN=Mdh2 PE=1 SV=1	791870000	694770000	335280000	993720000	936600000	375630000	757950000	652330000	286610000	650470000	352160000	1.0716e+09	709590000	369410000	1195100000	46637000	24944000	96791000	204880000	345430000	1175300000	169190000	299490000	1.0419e+09	237850000	509260000	1.5678e+09	0.89201	0.88239	0.82724	0.55943	0.49106	0.51581	1.7097	1.7325	2.2718	0.37752	0.36704	0.36233	1.481	1.5989	1.8001	5.0808	5.8571	5.8978
P18432	P18432	Myosin regulatory light chain 2	Mlc2	sp|P18432|MLR_DROME Myosin regulatory light chain 2 OS=Drosophila melanogaster OX=7227 GN=Mlc2 PE=1 SV=2	285160000	51784000	627240000	382650000	81594000	868390000	340710000	68103000	705350000	280250000	70747000	1077500000	349300000	70430000	1347500000	377340000	48227000	1.6364e+09	162760000	79931000	1170200000	63748000	44588000	644320000	88519000	43320000	755010000	0.2602	0.30336	0.25249	0.31851	0.24362	0.14289	0.50436	0.6973	0.51549	2.284	2.6481	2.254	4.6674	4.1608	5.0691	8.5749	9.1433	10.349
Q24560;A1ZBL0;P61857;A0A0B4LGH1;P08841	Q24560;A1ZBL0;P61857	Tubulin beta-1 chain;Tubulin beta-2 chain	betaTub56D;betaTub85D	sp|Q24560|TBB1_DROME Tubulin beta-1 chain OS=Drosophila melanogaster OX=7227 GN=betaTub56D PE=1 SV=2;tr|A1ZBL0|A1ZBL0_DROME Tubulin beta chain OS=Drosophila melanogaster OX=7227 GN=betaTub56D PE=1 SV=1;sp|P61857|TBB2_DROME Tubulin beta-2 chain OS=Drosophil	415340000	188340000	305070000	385310000	157090000	296880000	374370000	134100000	247440000	279000000	110370000	1171600000	330190000	118380000	1304800000	20783000	16752000	89033000	92592000	115800000	1161800000	75072000	97423000	1133400000	123860000	243550000	1.7278e+09	0.40902	0.45716	0.38177	0.33999	0.31736	0.33836	1.112	1.1176	1.4651	0.7866	0.7014	0.72954	3.6728	3.7229	3.9799	13.494	13.841	13.826
P22700-2	P22700-2	Calcium-transporting ATPase sarcoplasmic/endoplasmic reticulum type	Ca-P60A	sp|P22700-2|ATC1_DROME Isoform A of Calcium-transporting ATPase sarcoplasmic/endoplasmic reticulum type OS=Drosophila melanogaster OX=7227 GN=SERCA	249020000	119690000	260830000	291070000	142880000	339240000	200750000	102240000	211300000	552340000	124440000	1408400000	553040000	94988000	1350000000	31430000	5573700	79382000	226310000	149940000	1142400000	168720000	122670000	964610000	212390000	161990000	1390900000	0.46978	0.44419	0.49225	0.16877	0.159	0.14348	0.61508	0.68255	0.72438	0.95408	1.0375	0.9665	2.4646	2.45	2.6139	4.8119	5.2693	5.8522
Q9VIQ8	Q9VIQ8		COX4	tr|Q9VIQ8|Q9VIQ8_DROME Cytochrome c oxidase subunit 4 OS=Drosophila melanogaster OX=7227 GN=COX4 PE=1 SV=1	739830000	413550000	257060000	652180000	449590000	278910000	691030000	477160000	277650000	598950000	216850000	1180900000	1303600000	438150000	2444800000	32408000	11262000	73892000	174290000	199590000	1081500000	141270000	209830000	1.0502e+09	255200000	413150000	1.8096e+09	0.68014	0.56007	0.61032	0.27286	0.3212	0.34344	1.4379	1.5162	1.6423	0.32918	0.34357	0.33851	1.556	1.6496	1.8177	5.7638	8.0114	6.5628
X2J6D4;P84029	X2J6D4;P84029	Cytochrome c-2	Cyt-c-p	tr|X2J6D4|X2J6D4_DROME Cytochrome c proximal, isoform B OS=Drosophila melanogaster OX=7227 GN=Cyt-c-p PE=2 SV=1;sp|P84029|CYC2_DROME Cytochrome c-2 OS=Drosophila melanogaster OX=7227 GN=Cyt-c-p PE=1 SV=2	589640000	435240000	220670000	758520000	596680000	274070000	667940000	517180000	238290000	289720000	118900000	730070000	366890000	127250000	940920000	203210000	75480000	623790000	126410000	144670000	1.0222e+09	119030000	134250000	1.015e+09	138520000	183180000	1200200000	0.74513	0.78133	0.7314	0.38496	0.3524	0.3415	1.0215	1.2051	1.4243	0.37518	0.33246	0.32057	2.2018	2.3464	2.4105	6.5467	7.3156	7.7125
Q9VMS1	Q9VMS1		cype	tr|Q9VMS1|Q9VMS1_DROME Cyclope, isoform A OS=Drosophila melanogaster OX=7227 GN=cype PE=1 SV=3	592010000	395400000	230910000	655660000	484480000	260400000	571960000	384770000	230450000	566070000	194350000	978810000	367010000	98860000	699770000	37154000	12134000	80239000	144890000	219610000	997590000	121920000	181670000	786810000	143210000	242420000	1079300000	0.67464	0.66889	0.60496	0.29293	0.33585	0.27571	1.1792	1.5759	1.6806	0.39615	0.36725	0.35944	1.7348	1.8063	1.8192	5.8424	6.5658	7.237
P05661-3;P05661-21;E1JHJ3;P05661-23;P05661-20;P05661-18	P05661-3;P05661-21;E1JHJ3;P05661-23;P05661-20;P05661-18	Myosin heavy chain, muscle	Mhc	sp|P05661-3|MYSA_DROME Isoform BABDB of Myosin heavy chain, muscle OS=Drosophila melanogaster OX=7227 GN=Mhc;sp|P05661-21|MYSA_DROME Isoform H of Myosin heavy chain, muscle OS=Drosophila melanogaster OX=7227 GN=Mhc;tr|E1JHJ3|E1JHJ3_DROME Myosin heavy chain	316100000	65955000	787030000	320760000	72257000	852870000	296550000	55844000	724940000	234680000	47789000	1322300000	270760000	40086000	1444500000	48098000	8641300	291760000	112090000	48544000	994760000	95981000	49554000	988030000	103340000	42697000	1159500000	0.15329	0.14521	0.1804	0.095654	0.075406	0.10829	0.39059	0.38811	0.44643	2.3246	2.415	2.2823	5.5161	5.1935	5.3781	9.068	10.031	11.315
P06605;P06603;P06604;P06606	P06605;P06603;P06604	Tubulin alpha-3 chain;Tubulin alpha-1 chain;Tubulin alpha-2 chain	alphaTub84D;alphaTub84B;alphaTub85E	sp|P06605|TBA3_DROME Tubulin alpha-3 chain OS=Drosophila melanogaster OX=7227 GN=alphaTub84D PE=2 SV=1;sp|P06603|TBA1_DROME Tubulin alpha-1 chain OS=Drosophila melanogaster OX=7227 GN=alphaTub84B PE=1 SV=1;sp|P06604|TBA2_DROME Tubulin alpha-2 chain OS=Dros	674010000	288450000	348650000	589840000	249960000	331290000	497240000	206210000	256930000	483300000	158700000	1394600000	477890000	166320000	1.4822e+09	25590000	8890300	82256000	80168000	124700000	965230000	62977000	95673000	876930000	92086000	159510000	1308500000	0.41376	0.41505	0.40132	0.30694	0.32889	0.33444	1.5949	1.682	1.8356	0.46114	0.45989	0.44564	2.6847	2.7098	2.8922	11.656	14.233	13.595
C8VV14;P07764;F3YDE2;A4V3G1;P07764-3;P07764-2	C8VV14;P07764;F3YDE2;A4V3G1;P07764-3;P07764-2	Fructose-bisphosphate aldolase	Ald-RC;Ald;Ald-RH	tr|C8VV14|C8VV14_DROME Fructose-bisphosphate aldolase OS=Drosophila melanogaster OX=7227 GN=Ald1 PE=1 SV=1;sp|P07764|ALF_DROME Fructose-bisphosphate aldolase OS=Drosophila melanogaster OX=7227 GN=Ald1 PE=1 SV=5;tr|F3YDE2|F3YDE2_DROME Fructose-bisphosphate	1.5172e+09	1.6253e+09	825190000	1.5974e+09	2.0286e+09	748290000	1.5377e+09	1.7858e+09	766520000	830800000	732310000	707050000	757530000	641320000	633190000	77875000	63938000	62351000	249510000	642450000	957140000	165470000	532260000	735640000	297420000	870390000	1200300000	1.1039	1.2908	1.1746	0.87596	0.81267	0.81744	2.9309	3.183	3.5093	0.29626	0.24816	0.27146	0.60833	0.66962	0.6993	3.6328	3.7914	4.0738
Q9W401;Q9W401-2	Q9W401;Q9W401-2	Probable citrate synthase, mitochondrial	kdn	sp|Q9W401|CISY_DROME Probable citrate synthase, mitochondrial OS=Drosophila melanogaster OX=7227 GN=Cs1 PE=2 SV=1;sp|Q9W401-2|CISY_DROME Isoform B of Probable citrate synthase, mitochondrial OS=Drosophila melanogaster OX=7227 GN=Cs1	424220000	279030000	211120000	562510000	360600000	243000000	547670000	354860000	228900000	568400000	132610000	1224600000	518330000	128900000	1110000000	50178000	27080000	108860000	222510000	124820000	956060000	206950000	110490000	853520000	234850000	134420000	1.0323e+09	0.6628	0.62588	0.67311	0.24316	0.24883	0.25026	0.8407	0.93361	0.9778	0.45471	0.41746	0.41159	2.4713	2.2962	2.4038	6.207	6.2825	6.6559
Q9W2X6	Q9W2X6		ATPsyndelta	tr|Q9W2X6|Q9W2X6_DROME ATP synthase, delta subunit, isoform A OS=Drosophila melanogaster OX=7227 GN=ATPsyndelta PE=1 SV=1	620900000	398250000	183160000	784480000	571660000	265180000	518080000	343990000	157070000	379190000	141810000	632700000	345440000	120920000	601480000	222410000	93911000	496530000	253190000	184710000	887010000	205970000	195970000	846330000	355240000	218560000	854610000	0.71606	0.72184	0.73913	0.37478	0.45247	0.40772	1.5275	1.6392	1.4084	0.30365	0.33282	0.31839	1.7747	1.7936	2.1896	6.4065	7.1402	7.2355
M9PJN8;P07487;Q7JY07	M9PJN8;P07487	Glyceraldehyde-3-phosphate dehydrogenase;Glyceraldehyde-3-phosphate dehydrogenase 2	Gapdh2	tr|M9PJN8|M9PJN8_DROME Glyceraldehyde-3-phosphate dehydrogenase OS=Drosophila melanogaster OX=7227 GN=Gapdh2 PE=3 SV=1;sp|P07487|G3P2_DROME Glyceraldehyde-3-phosphate dehydrogenase 2 OS=Drosophila melanogaster OX=7227 GN=Gapdh2 PE=1 SV=2	943720000	1.0625e+09	414630000	1.0515e+09	1203100000	385670000	803670000	878050000	303220000	658800000	526670000	534880000	640260000	505950000	535130000	39597000	31107000	37220000	189500000	485130000	764320000	127250000	373510000	592700000	179410000	584500000	911100000	1.1135	1.2334	1.0937	0.82367	0.77652	0.75011	2.5561	2.77	3.015	0.37401	0.33367	0.37054	0.74203	0.8081	0.84944	3.7152	4.2421	4.4909
P09491-2;A0A0B4KHJ9;CON__Q3SX28	P09491-2;A0A0B4KHJ9	Tropomyosin-2	Tm2	sp|P09491-2|TPM2_DROME Isoform Embryonic of Tropomyosin-2 OS=Drosophila melanogaster OX=7227 GN=Tm2;tr|A0A0B4KHJ9|A0A0B4KHJ9_DROME Tropomyosin 2, isoform E OS=Drosophila melanogaster OX=7227 GN=Tm2 PE=1 SV=1	275150000	65072000	435430000	259720000	87630000	427300000	246450000	64024000	324770000	190100000	36816000	590320000	152230000	27607000	443460000	162850000	21027000	630680000	115690000	63094000	740650000	51000000	31810000	497650000	42763000	25092000	396750000	0.19764	0.18893	0.15957	0.21946	0.12722	0.12237	0.48508	0.5566	0.54073	1.3057	1.5464	1.2922	2.8667	3.3917	3.564	5.4042	8.436	9.3133
E1JHR5;P15007-2;P15007	E1JHR5;P15007-2;P15007	Enolase	Eno	tr|E1JHR5|E1JHR5_DROME Enolase OS=Drosophila melanogaster OX=7227 GN=Eno PE=1 SV=1;sp|P15007-2|ENO_DROME Isoform A of Enolase OS=Drosophila melanogaster OX=7227 GN=Eno;sp|P15007|ENO_DROME Enolase OS=Drosophila melanogaster OX=7227 GN=Eno PE=1 SV=2	1187800000	1207100000	423670000	1293700000	1.4833e+09	439710000	1.0662e+09	1130400000	359150000	892210000	653710000	688630000	583730000	597990000	527140000	66613000	52206000	63508000	204420000	485920000	694270000	146190000	391840000	597490000	265580000	764700000	1.0101e+09	1.0644	1.1584	1.0912	0.84389	0.88219	0.82897	2.8295	3.1495	3.7376	0.29296	0.28488	0.28746	0.69976	0.74138	0.74378	3.556	3.9791	4.2915
Q7KNR7;Q9VV42;B7Z061;Q8IQN8	Q7KNR7;Q9VV42;B7Z061;Q8IQN8		Pdh	tr|Q7KNR7|Q7KNR7_DROME Photoreceptor dehydrogenase, isoform C OS=Drosophila melanogaster OX=7227 GN=Pdh PE=1 SV=1;tr|Q9VV42|Q9VV42_DROME HL08057p OS=Drosophila melanogaster OX=7227 GN=Pdh PE=1 SV=1;tr|B7Z061|B7Z061_DROME Photoreceptor dehydrogenase, isofor	0	0	0	0	0	0	0	0	0	1.0328e+09	557440000	399980000	1.0171e+09	536610000	401390000	61046000	37680000	22863000	186970000	471020000	687430000	150580000	392560000	617050000	210250000	597910000	821280000	NaN	NaN	NaN	0.52436	0.57401	0.54116	2.4269	2.7112	2.838	NaN	NaN	NaN	0.35664	0.33388	0.35031	3.2617	4.0226	3.9182
A0A0B4LHL7;Q24251	A0A0B4LHL7;Q24251	ATP synthase subunit d, mitochondrial	ATPsyn-d	tr|A0A0B4LHL7|A0A0B4LHL7_DROME ATP synthase subunit d, mitochondrial OS=Drosophila melanogaster OX=7227 GN=ATPsynD PE=3 SV=1;sp|Q24251|ATP5H_DROME ATP synthase subunit d, mitochondrial OS=Drosophila melanogaster OX=7227 GN=ATPsynD PE=2 SV=2	298700000	215210000	131660000	424600000	317810000	183850000	340930000	281050000	147700000	258770000	110370000	492670000	221620000	96954000	492170000	17446000	6462000	44103000	91624000	144980000	674120000	65292000	95003000	510910000	80312000	144760000	690630000	0.89193	0.76507	0.7609	0.46041	0.40347	0.42673	1.5114	1.6587	2.0126	0.36469	0.40426	0.37514	1.689	1.7761	1.9114	5.3477	6.3808	7.5442
M9PDX8	M9PDX8		nrv3	tr|M9PDX8|M9PDX8_DROME Nervana 3, isoform E OS=Drosophila melanogaster OX=7227 GN=nrv3 PE=1 SV=1	0	0	0	0	0	0	0	0	0	174070000	23398000	690930000	144490000	20036000	561260000	19366000	2489500	78895000	60825000	43131000	653320000	42085000	30327000	473450000	54702000	44814000	678440000	NaN	NaN	NaN	0.16302	0.16278	0.17796	0.82307	1.0804	0.92074	NaN	NaN	NaN	3.3026	3.375	3.3813	11.231	12.573	12.451
M9PJQ5;P36188-3;M9NH88;P36188-2	M9PJQ5;P36188-3;M9NH88;P36188-2	Troponin I	wupA	tr|M9PJQ5|M9PJQ5_DROME Wings up A, isoform K OS=Drosophila melanogaster OX=7227 GN=wupA PE=1 SV=1;sp|P36188-3|TNNI_DROME Isoform 2 of Troponin I OS=Drosophila melanogaster OX=7227 GN=wupA;tr|M9NH88|M9NH88_DROME Wings up A, isoform J OS=Drosophila melanogas	553420000	104080000	956520000	689510000	124920000	1227200000	523370000	85554000	930620000	211880000	38268000	766020000	174770000	33474000	631350000	248420000	22258000	942310000	68733000	38046000	650100000	71327000	43403000	762390000	70114000	41179000	703520000	0.18132	0.16648	0.15036	0.13866	0.22828	0.10977	0.52154	0.58403	0.49296	1.371	1.5804	1.6731	3.1416	3.3769	3.6401	7.7148	9.0788	8.2944
X2JEX8;P06607;Q9VPH3;Q4V566;M9NFL7	X2JEX8;P06607	Vitellogenin-3	Yp3	tr|X2JEX8|X2JEX8_DROME Yolk protein 3, isoform B OS=Drosophila melanogaster OX=7227 GN=Yp3 PE=1 SV=1;sp|P06607|VIT3_DROME Vitellogenin-3 OS=Drosophila melanogaster OX=7227 GN=Yp3 PE=1 SV=1	417910000	2.0131e+09	154780000	390270000	2.1126e+09	137030000	331310000	1337600000	95602000	602760000	2738300000	186540000	494490000	3.2216e+09	175010000	64498000	302370000	19509000	184030000	2420900000	641780000	137510000	1.9548e+09	344400000	305430000	5050900000	917760000	5.1389	5.9103	4.7014	4.3784	5.7585	5.1681	11.539	13.859	15.972	0.59858	0.54625	0.40541	0.17007	0.18715	0.45738	2.2395	2.5285	2.6165
Q24439	Q24439	ATP synthase subunit O, mitochondrial	Oscp	sp|Q24439|ATPO_DROME ATP synthase subunit O, mitochondrial OS=Drosophila melanogaster OX=7227 GN=ATPsynO PE=2 SV=2	446170000	327030000	212770000	435770000	340030000	169160000	552640000	423290000	258320000	284660000	144090000	632800000	268380000	96447000	608480000	30035000	14014000	70680000	89531000	118030000	622160000	68563000	105380000	538750000	91166000	162990000	782730000	0.72712	0.76302	0.73083	0.4093	0.40725	0.42085	1.4128	1.3206	1.7926	0.3841	0.32438	0.3771	1.7863	1.8332	2.346	5.6781	6.2105	7.0235
Q9W141;Q9W141-2	Q9W141;Q9W141-2	Putative ATP synthase subunit f, mitochondrial	CG4692	sp|Q9W141|ATPK_DROME Putative ATP synthase subunit f, mitochondrial OS=Drosophila melanogaster OX=7227 GN=ATPsynF PE=3 SV=1;sp|Q9W141-2|ATPK_DROME Isoform B of Putative ATP synthase subunit f, mitochondrial OS=Drosophila melanogaster OX=7227 GN=ATPsynF	159460000	120740000	65039000	376940000	247500000	133660000	128060000	107260000	51297000	314940000	143670000	648650000	514330000	200950000	940210000	7995800	4034600	19631000	105900000	160070000	605160000	143820000	163020000	792030000	221350000	286580000	1109000000	0.7531	0.68467	0.85414	0.48006	0.46211	0.55414	1.679	1.1465	1.1918	0.36252	0.33213	0.37073	1.6845	1.8238	2.1611	5.6574	5.0123	5.3449
Q9VV46	Q9VV46		Cpr72Ec	tr|Q9VV46|Q9VV46_DROME Cuticular protein 72Ec OS=Drosophila melanogaster OX=7227 GN=Cpr72Ec PE=1 SV=1	0	0	0	0	0	0	0	0	0	9917500	12424000	117120000	4358100	10516000	58318000	5042700	4496400	76592000	13567000	19985000	599090000	12298000	15850000	370710000	8179000	24411000	270630000	NaN	NaN	NaN	1.0228	2.3718	0.59029	2.1434	1.4257	2.0133	NaN	NaN	NaN	8.321	7.6254	8.6769	52.371	27.955	28.582
A0A0B4LHX6;A0A0B4LJ12;P08879	A0A0B4LHX6;A0A0B4LJ12;P08879	Nucleoside diphosphate kinase	awd	tr|A0A0B4LHX6|A0A0B4LHX6_DROME Nucleoside diphosphate kinase OS=Drosophila melanogaster OX=7227 GN=awd PE=1 SV=1;tr|A0A0B4LJ12|A0A0B4LJ12_DROME Nucleoside diphosphate kinase OS=Drosophila melanogaster OX=7227 GN=awd PE=1 SV=1;sp|P08879|NDKA_DROME Nucleosid	1185600000	1205200000	371970000	1266800000	1374700000	337130000	1082000000	1.0685e+09	331510000	451610000	472660000	391060000	306550000	341530000	274080000	28288000	29354000	27333000	119540000	346410000	595470000	85508000	300090000	476200000	108830000	384200000	625600000	0.97096	1.0939	1.0274	1.094	1.1502	1.0068	4.1068	3.5801	4.2033	0.29642	0.25341	0.27155	0.72345	0.76903	0.89189	4.512	5.1349	5.6496
C0HL66;C0HL67;P02299	C0HL66;C0HL67;P02299	Histone H3	His3	sp|C0HL66|H33A_DROME Histone H3.3A OS=Drosophila melanogaster OX=7227 GN=His3.3A PE=1 SV=1;sp|C0HL67|H33B_DROME Histone H3.3B OS=Drosophila melanogaster OX=7227 GN=His3.3B PE=1 SV=1;sp|P02299|H3_DROME Histone H3 OS=Drosophila melanogaster OX=7227 GN=His3 P	162460000	270650000	749240000	229460000	474870000	1199000000	180470000	375410000	938970000	103460000	56024000	884000000	180580000	182530000	1.6633e+09	20850000	8637600	208870000	31532000	27767000	594570000	46162000	57089000	987130000	45131000	61519000	1.0102e+09	1.0532	2.0813	1.7736	0.41507	0.71423	0.40833	0.96832	1.2577	1.2589	4.6218	4.6194	5.2198	7.9583	8.0416	8.0642	18.043	18.227	20.783
Q9XY35	Q9XY35	Cytochrome b-c1 complex subunit 9	ox	sp|Q9XY35|QCR9_DROME Cytochrome b-c1 complex subunit 9 OS=Drosophila melanogaster OX=7227 GN=ox PE=3 SV=1	860890000	649240000	359710000	559130000	450170000	188050000	847810000	677040000	363490000	434730000	115880000	793990000	397880000	134760000	712220000	36442000	13172000	73102000	82544000	118180000	587450000	106240000	159170000	734550000	138400000	218180000	975700000	0.70869	0.82596	0.77293	0.36348	0.37412	0.34382	1.2158	1.4336	1.7645	0.40512	0.37897	0.3852	1.809	1.9766	1.9828	5.2299	5.8539	6.5819
Q9VU35;Q9VFN5	Q9VU35			tr|Q9VU35|Q9VU35_DROME RH34413p OS=Drosophila melanogaster OX=7227 GN=Dmel\CG11267 PE=1 SV=1	481320000	483390000	164830000	391720000	417930000	110770000	393380000	401890000	124900000	257700000	170040000	290740000	249460000	153100000	300600000	71146000	58038000	129130000	83556000	210870000	582460000	68115000	150990000	407780000	89113000	276330000	672140000	1.0083	1.0689	1.0088	0.69508	0.72794	0.77122	2.495	3.0237	3.2438	0.28125	0.2532	0.30311	1.3552	1.3892	1.5836	8.2558	7.9722	7.3818
Q9VIE8	Q9VIE8		Acon	tr|Q9VIE8|Q9VIE8_DROME Aconitate hydratase, mitochondrial OS=Drosophila melanogaster OX=7227 GN=mAcon1 PE=1 SV=2	379150000	282540000	163540000	400730000	306720000	180180000	384050000	285660000	160970000	316370000	107060000	548990000	313600000	104120000	539050000	20728000	6835300	39275000	102990000	124770000	581260000	97385000	101840000	486270000	100030000	143860000	692320000	0.75167	0.77925	0.77673	0.34135	0.32045	0.29879	1.2535	1.4051	1.6227	0.37043	0.37115	0.35167	1.6394	1.5881	1.828	5.681	6.4771	7.1861
P19351-12	P19351-12	Troponin T, skeletal muscle	up	sp|P19351-12|TNNT_DROME Isoform 12 of Troponin T, skeletal muscle OS=Drosophila melanogaster OX=7227 GN=up	285240000	146540000	601520000	187850000	122840000	434450000	190920000	108120000	385320000	178220000	187260000	754720000	208820000	299440000	818120000	181560000	23798000	772240000	137210000	43399000	576940000	54993000	21000000	501460000	55408000	33615000	609400000	0.11618	0.32929	0.21432	0.15864	0.22492	0.12798	0.4057	0.95669	0.53711	1.8498	2.1371	1.9115	4.0083	3.6483	4.07	7.3304	16.252	9.4765
O62619-2;O62619	O62619-2;O62619	Pyruvate kinase	PyK	sp|O62619-2|KPYK_DROME Isoform B of Pyruvate kinase OS=Drosophila melanogaster OX=7227 GN=Pyk;sp|O62619|KPYK_DROME Pyruvate kinase OS=Drosophila melanogaster OX=7227 GN=Pyk PE=2 SV=2	591650000	845690000	230830000	658920000	1.0167e+09	238290000	564540000	743900000	215410000	483650000	436730000	386160000	498900000	427960000	554240000	27259000	21578000	23967000	144120000	380500000	556420000	91731000	287650000	452530000	144950000	490800000	671490000	1.3956	1.4277	1.4183	0.82907	0.86151	0.77817	2.691	3.0331	3.445	0.34137	0.32059	0.32345	0.69416	0.75275	0.76677	3.9033	4.4528	4.3166
P06754;Q8IGY1;Q95TA3;Q8IG84	P06754;Q8IGY1	Tropomyosin-1, isoforms 9A/A/B	Tm1	sp|P06754|TPM1_DROME Tropomyosin-1, isoforms 9A/A/B OS=Drosophila melanogaster OX=7227 GN=Tm1 PE=1 SV=2;tr|Q8IGY1|Q8IGY1_DROME RE08101p OS=Drosophila melanogaster OX=7227 GN=Tm1 PE=1 SV=1	261640000	190640000	580490000	378500000	188930000	880630000	330840000	181300000	642270000	155290000	66005000	775750000	142960000	61378000	565570000	233100000	40655000	1371600000	51160000	28409000	551860000	66021000	55762000	785630000	67802000	75812000	846540000	0.20331	0.22501	0.24127	0.25469	0.2396	0.14103	0.51052	0.57952	0.9213	1.9458	1.8299	1.643	4.2194	4.0978	4.6163	7.0189	8.8403	8.8475
Q9VKM3	Q9VKM3		ATPsynG	tr|Q9VKM3|Q9VKM3_DROME ATP synthase subunit OS=Drosophila melanogaster OX=7227 GN=ATPsynG PE=1 SV=1	655480000	572430000	240360000	761530000	724060000	261040000	418980000	337140000	200500000	284770000	134420000	508810000	277840000	140920000	490910000	22162000	10833000	38501000	83314000	145750000	546970000	83520000	149260000	605820000	87809000	182990000	638770000	0.72256	0.81429	0.73593	0.48506	0.48211	0.50775	1.7467	1.6511	2.1639	0.31772	0.34347	0.34239	1.3863	1.4559	1.7763	5.2703	6.0064	6.6756
Q9VMT2;X2JD70	Q9VMT2;X2JD70		TpnC25D	tr|Q9VMT2|Q9VMT2_DROME GEO07854p1 OS=Drosophila melanogaster OX=7227 GN=TpnC25D PE=1 SV=2;tr|X2JD70|X2JD70_DROME Troponin C at 25D, isoform B OS=Drosophila melanogaster OX=7227 GN=TpnC25D PE=1 SV=1	0	0	0	0	0	0	0	0	0	308010000	94394000	568990000	122450000	49119000	348040000	155230000	62777000	493600000	128650000	108720000	541600000	103950000	52163000	319210000	250320000	123430000	608180000	NaN	NaN	NaN	0.40569	0.29204	0.14341	1.0868	0.74022	1.0301	NaN	NaN	NaN	2.4621	2.6431	2.7449	5.7441	4.8168	5.8867
O01666	O01666	ATP synthase subunit gamma, mitochondrial	ATPsyn-gamma	sp|O01666|ATPG_DROME ATP synthase subunit gamma, mitochondrial OS=Drosophila melanogaster OX=7227 GN=ATPsyngamma PE=2 SV=2	450970000	339460000	201320000	611510000	486180000	287400000	424010000	316550000	154380000	264720000	138680000	536690000	241450000	105900000	517940000	14893000	6546900	34235000	72527000	114210000	503900000	83689000	123210000	590130000	94805000	185800000	807260000	0.78861	0.77804	0.7797	0.47555	0.42927	0.41488	1.5778	1.6149	2.012	0.37804	0.39472	0.34619	1.8762	1.8437	2.1963	6.5092	6.7453	6.1088
Q7JYK1;R9PY16;Q9W418;A4V1F9;P18101;P15357;P0CG69	Q7JYK1;R9PY16;Q9W418;A4V1F9;P18101;P15357;P0CG69	Ubiquitin-60S ribosomal protein L40;Ubiquitin;60S ribosomal protein L40;Ubiquitin-40S ribosomal protein S27a;Ubiquitin;40S ribosomal protein S27a;Polyubiquitin;Ubiquitin	RpL40;Ubi-p5E;Ubi-p63E;RpS27A	tr|Q7JYK1|Q7JYK1_DROME Ubiquitin-ribosomal protein eL40 fusion protein OS=Drosophila melanogaster OX=7227 GN=RpL40 PE=1 SV=1;tr|R9PY16|R9PY16_DROME Ubiquitin-like domain-containing protein OS=Drosophila melanogaster OX=7227 GN=Ubi-p5E5 PE=4 SV=1;tr|Q9W418|	942000000	1.723e+09	227000000	1243600000	2576000000	285930000	996240000	1.9305e+09	233870000	1235500000	1.5321e+09	428010000	654500000	859960000	245380000	56447000	78499000	18716000	151270000	711330000	493300000	174630000	746200000	547980000	165660000	900100000	651440000	2.4542	2.8237	3.0104	1.4184	1.6722	1.3781	5.1725	4.4481	5.8426	0.26485	0.1921	0.25619	0.35323	0.35774	0.3279	2.6475	2.764	3.5899
X2JJG8;X2JDA5;P20478;P20478-3;P20478-2	X2JJG8;X2JDA5;P20478;P20478-3;P20478-2	Glutamine synthetase;Glutamine synthetase 2 cytoplasmic	Gs2	tr|X2JJG8|X2JJG8_DROME Glutamine synthetase OS=Drosophila melanogaster OX=7227 GN=Gs2 PE=1 SV=1;tr|X2JDA5|X2JDA5_DROME Glutamine synthetase OS=Drosophila melanogaster OX=7227 GN=Gs2 PE=1 SV=1;sp|P20478|GLNA2_DROME Glutamine synthetase 2 cytoplasmic OS=Dros	150910000	269220000	47829000	185410000	369620000	49501000	129110000	207110000	41876000	637780000	383380000	322220000	482170000	292220000	249200000	35710000	19152000	16796000	127770000	325700000	474390000	113070000	330340000	475830000	123150000	348130000	561030000	1.7105	1.7929	1.3974	0.58906	0.63442	0.51916	2.3661	2.7651	2.9257	0.25996	0.24697	0.27299	0.47042	0.51021	0.40805	3.1859	3.6375	3.9709
Q9VQF7	Q9VQF7		Bacc	sp|Q9VQF7|BACC_DROME Bacchus OS=Drosophila melanogaster OX=7227 GN=Bacc PE=2 SV=1	339390000	702500000	53638000	458050000	1.0372e+09	77342000	522120000	1.0273e+09	77228000	474220000	416370000	219570000	388610000	439780000	180890000	1370800000	1342000000	614970000	90025000	377410000	469660000	132110000	603180000	647970000	122750000	548920000	686780000	2.05	2.5657	2.0297	1.0468	1.1159	0.98536	4.8404	3.9719	5.7293	0.14141	0.15663	0.15172	0.32984	0.36618	0.46448	4.5644	4.2313	4.9315
M9PC43;P13706-2;M9PET0;B5RIM9;P13706-4;P13706-3;P13706	M9PC43;P13706-2;M9PET0;B5RIM9;P13706-4;P13706-3;P13706	Glycerol-3-phosphate dehydrogenase [NAD(+)];Glycerol-3-phosphate dehydrogenase [NAD(+)], cytoplasmic	Gpdh	tr|M9PC43|M9PC43_DROME Glycerol-3-phosphate dehydrogenase [NAD(+)] OS=Drosophila melanogaster OX=7227 GN=Gpdh1 PE=1 SV=1;sp|P13706-2|GPDA_DROME Isoform GPDH-1 of Glycerol-3-phosphate dehydrogenase [NAD(+)], cytoplasmic OS=Drosophila melanogaster OX=7227 GN	1.8941e+09	1189400000	466020000	2.0732e+09	1.5273e+09	492960000	1.7938e+09	1196100000	429840000	611360000	423450000	316650000	440910000	342740000	266340000	35286000	23148000	19756000	156820000	369240000	454580000	153630000	315050000	424240000	222530000	440070000	609980000	0.61879	0.69793	0.6727	0.68779	0.73006	0.64875	2.0942	2.1115	2.6299	0.22551	0.21321	0.21362	0.51211	0.55718	0.46708	2.6571	2.7881	3.2342
Q9VAC1	Q9VAC1			tr|Q9VAC1|Q9VAC1_DROME Acetyl-CoA hydrolase OS=Drosophila melanogaster OX=7227 GN=anon-WO0153538.36 PE=1 SV=1	621920000	555620000	168010000	688680000	683830000	179970000	642280000	614040000	180210000	381930000	290390000	324530000	383570000	299670000	355730000	29328000	22454000	29961000	105950000	234750000	449920000	75671000	202250000	366050000	129230000	349880000	579880000	0.94718	0.97488	0.96016	0.85094	0.82878	0.8013	2.7574	2.7627	3.6117	0.27137	0.26082	0.26201	0.77659	0.84383	0.8696	4.7893	4.837	5.1373
A0A0B4KFT0;Q94514	A0A0B4KFT0;Q94514	Cytochrome c oxidase subunit 5A, mitochondrial	CoVa	tr|A0A0B4KFT0|A0A0B4KFT0_DROME Cytochrome c oxidase subunit 5A, mitochondrial OS=Drosophila melanogaster OX=7227 GN=COX5A PE=3 SV=1;sp|Q94514|COX5A_DROME Cytochrome c oxidase subunit 5A, mitochondrial OS=Drosophila melanogaster OX=7227 GN=COX5A PE=2 SV=2	263420000	170220000	142080000	586670000	378490000	305130000	229940000	176840000	112560000	138690000	57125000	330510000	91362000	40096000	188620000	130880000	49195000	293180000	76788000	98525000	443290000	49690000	70950000	310270000	85672000	101120000	483090000	0.72147	0.66971	0.77608	0.36062	0.37993	0.36932	1.2616	1.2759	1.553	0.3205	0.32905	0.33615	1.7104	1.7667	2.0037	6.2726	5.7512	7.096
Q7K084	Q7K084		Obp44a	tr|Q7K084|Q7K084_DROME Odorant-binding protein 44a, isoform A OS=Drosophila melanogaster OX=7227 GN=Obp44a PE=1 SV=1	0	0	0	0	0	0	0	0	0	430350000	458490000	108870000	266460000	298030000	65669000	466960000	558490000	123030000	107370000	516370000	442950000	88918000	417450000	436410000	104010000	522140000	516960000	NaN	NaN	NaN	1.0729	1.3204	1.0197	4.3046	4.5141	5.1816	NaN	NaN	NaN	0.2653	0.22209	0.30665	4.0829	4.921	4.3075
Q0E8E8	Q0E8E8		Mpcp	tr|Q0E8E8|Q0E8E8_DROME MIP08013p1 OS=Drosophila melanogaster OX=7227 GN=Mpcp2 PE=1 SV=1	500510000	379570000	122500000	558060000	416320000	124270000	534180000	412700000	126380000	387260000	172870000	541670000	350450000	173090000	537780000	26024000	12031000	42929000	73076000	143770000	433880000	75195000	153910000	464030000	83073000	216150000	597380000	0.78084	0.73968	0.71171	0.43855	0.4138	0.40218	1.8541	2.2393	2.4444	0.22851	0.21837	0.22372	1.2688	1.4081	1.4691	5.4915	6.0309	6.9376
Q9VFF0	Q9VFF0		UQCR-C1	tr|Q9VFF0|Q9VFF0_DROME GH01077p OS=Drosophila melanogaster OX=7227 GN=UQCR-C1 PE=1 SV=2	229050000	197190000	89884000	306220000	274510000	187600000	247410000	205230000	96976000	175790000	111610000	335620000	264430000	171490000	454490000	9570900	4550600	20888000	77298000	172470000	425160000	46132000	140270000	283190000	85283000	187050000	520440000	0.79275	0.84001	0.7209	0.44642	0.42869	0.43036	1.9197	1.4587	1.1683	0.37905	0.39569	0.35706	1.5596	1.6745	1.9516	7.4629	7.0492	4.496
P08736	P08736	Elongation factor 1-alpha 1	Ef1alpha48D	sp|P08736|EF1A1_DROME Elongation factor 1-alpha 1 OS=Drosophila melanogaster OX=7227 GN=eEF1alpha1 PE=1 SV=2	1095200000	1423700000	249060000	1100100000	1.5662e+09	285480000	1109900000	1359300000	257940000	592180000	684980000	274800000	463370000	586210000	168110000	35179000	41349000	10888000	105310000	464340000	422260000	101980000	489160000	423180000	131240000	626220000	561660000	1.2987	1.4386	1.2206	1.191	1.289	1.2989	4.3797	4.7987	4.7957	0.18487	0.16751	0.18044	0.34801	0.35969	0.38538	3.8333	4.0385	4.3599
Q94516	Q94516	ATP synthase subunit b, mitochondrial	ATPsyn-b	sp|Q94516|AT5F1_DROME ATP synthase subunit b, mitochondrial OS=Drosophila melanogaster OX=7227 GN=ATPsynB PE=2 SV=2	254050000	203070000	115120000	260150000	182360000	102360000	245850000	163120000	98540000	204910000	78990000	422800000	162470000	71004000	369560000	38696000	9621700	48093000	64438000	96265000	410180000	232570000	128580000	652030000	210930000	144370000	675520000	0.84267	0.73985	0.74867	0.37526	0.45004	0.40938	0.97907	1.2727	1.615	0.38639	0.41743	0.38505	1.5376	1.7273	1.8976	4.5449	7.6394	6.715
Q9VLC5	Q9VLC5		Aldh	tr|Q9VLC5|Q9VLC5_DROME Aldehyde dehydrogenase OS=Drosophila melanogaster OX=7227 GN=Aldh PE=1 SV=1	1104800000	1334000000	314310000	1421300000	1.7398e+09	391060000	1379500000	1.624e+09	388410000	847900000	758720000	309310000	603510000	609210000	229420000	51259000	49059000	19579000	159650000	525450000	406920000	132290000	430740000	349730000	187480000	736930000	557070000	1.1606	1.1443	1.2773	0.96051	0.93983	1.0554	3.2985	3.504	3.9427	0.22215	0.19729	0.21659	0.33801	0.35089	0.34244	2.4198	2.6119	3.0663
Q9VWH4;Q9VWH4-2;Q8T0R3	Q9VWH4;Q9VWH4-2	Probable isocitrate dehydrogenase [NAD] subunit alpha, mitochondrial	l(1)G0156	sp|Q9VWH4|IDH3A_DROME Probable isocitrate dehydrogenase [NAD] subunit alpha, mitochondrial OS=Drosophila melanogaster OX=7227 GN=Idh3a PE=2 SV=1;sp|Q9VWH4-2|IDH3A_DROME Isoform A of Probable isocitrate dehydrogenase [NAD] subunit alpha, mitochondrial OS=Dr	64507000	48095000	42351000	120470000	89229000	80924000	125250000	91124000	75527000	172590000	78738000	467530000	144460000	47180000	407440000	9702600	2431000	28296000	44263000	59111000	404070000	36461000	50920000	338330000	43360000	66972000	447110000	0.7754	0.80307	0.73815	0.32338	0.33876	0.3502	1.1855	1.3782	1.3066	0.68065	0.65174	0.53944	2.5729	2.7428	2.8298	7.5205	9.1865	8.5334
Q0E8X7	Q0E8X7			tr|Q0E8X7|Q0E8X7_DROME Reduction of Rh1, isoform A OS=Drosophila melanogaster OX=7227 GN=roh PE=1 SV=1	346000000	198510000	128440000	294130000	182120000	117550000	425710000	294010000	181750000	202560000	88736000	417040000	200700000	79070000	415360000	23139000	10184000	53095000	62646000	75929000	399220000	53699000	90192000	449010000	69747000	116850000	554990000	0.63583	0.63507	0.62989	0.40959	0.3758	0.43785	1.2473	1.6289	1.9953	0.39163	0.37396	0.40392	1.8888	1.9159	2.0349	6.1087	7.6509	7.3344
X2JD55;P02843	X2JD55;P02843	Vitellogenin-1	Yp1	tr|X2JD55|X2JD55_DROME Yolk protein 1, isoform B OS=Drosophila melanogaster OX=7227 GN=Yp1 PE=1 SV=1;sp|P02843|VIT1_DROME Vitellogenin-1 OS=Drosophila melanogaster OX=7227 GN=Yp1 PE=1 SV=1	245300000	1213800000	104110000	343470000	1.9728e+09	156410000	273900000	1104900000	109930000	732040000	3.1047e+09	203820000	537580000	2803400000	159870000	91034000	400970000	19175000	353170000	2204200000	387430000	328670000	1.7701e+09	302510000	393730000	3.9888e+09	587830000	6.8766	6.3159	4.6933	5.5419	6.1204	5.0578	15.077	13.578	19.356	0.23428	0.49046	0.37026	0.23342	0.17425	0.41148	2.3318	2.5249	2.7511
P48375	P48375	12 kDa FK506-binding protein	FK506-bp2	sp|P48375|FKB12_DROME Peptidyl-prolyl cis-trans isomerase Fkbp12 OS=Drosophila melanogaster OX=7227 GN=Fkbp12 PE=3 SV=2	580690000	653860000	163260000	875240000	1146200000	249220000	564710000	640190000	147420000	155940000	224670000	137550000	160340000	274970000	150430000	102020000	65541000	109180000	118210000	265920000	381510000	81269000	145650000	259690000	145930000	293720000	442400000	1.0668	1.1534	1.0262	0.85142	0.86527	0.87001	2.3563	1.7798	2.8749	0.23828	0.25406	0.25326	0.73781	0.85387	0.89214	3.524	2.9207	5.1203
Q960M4	Q960M4		Prx5	tr|Q960M4|Q960M4_DROME Peroxiredoxin-5 OS=Drosophila melanogaster OX=7227 GN=Prx5 PE=1 SV=1	412490000	356100000	120560000	484130000	456250000	145070000	302570000	259340000	83314000	274660000	124460000	353530000	205720000	97279000	284170000	90599000	36770000	129350000	72894000	124880000	379650000	58208000	96418000	272890000	72363000	157450000	426490000	0.84413	0.85736	0.82214	0.43864	0.45931	0.46018	2.032	1.8958	2.2405	0.29652	0.24681	0.26159	1.1031	1.1938	1.3068	4.8257	4.9744	4.8116
P11147;C7LA75;Q8I0E9	P11147;C7LA75	Heat shock 70 kDa protein cognate 4	Hsc70-4;Hsc70-4-RA	sp|P11147|HSP7D_DROME Heat shock 70 kDa protein cognate 4 OS=Drosophila melanogaster OX=7227 GN=Hsc70-4 PE=1 SV=3;tr|C7LA75|C7LA75_DROME Heat shock protein cognate 4, isoform G OS=Drosophila melanogaster OX=7227 GN=Hsc70-4 PE=1 SV=1	396530000	649460000	130600000	392440000	728350000	154280000	361120000	618960000	122270000	321290000	331900000	185090000	286090000	299950000	160890000	20024000	18578000	9767000	91827000	288700000	368730000	44178000	187880000	246400000	72302000	377790000	396500000	1.5769	1.6472	1.9304	1.0297	1.0659	1.0444	4.0285	4.1556	4.1885	0.18008	0.1642	0.16265	0.46412	0.47204	0.5098	3.995	4.784	4.6786
Q4AB57;P84051	Q4AB57;P84051	Histone H2A	His2A:CG33859;His2A	tr|Q4AB57|Q4AB57_DROME Histone H2A OS=Drosophila melanogaster OX=7227 GN=His2A:CG33859 PE=3 SV=1;sp|P84051|H2A_DROME Histone H2A OS=Drosophila melanogaster OX=7227 GN=His2A PE=1 SV=2	86849000	37068000	222460000	41158000	12379000	107460000	112510000	51819000	285440000	86248000	30778000	431000000	76283000	53842000	431550000	4330000	2841100	25519000	28081000	13257000	366490000	8843700	16269000	254630000	25830000	37488000	516900000	0.42894	0.40744	0.48016	0.41762	0.35198	0.53865	0.67073	1.4856	1.72	2.9451	2.4789	2.4154	4.6151	4.9009	5.4797	13.537	22.929	18.7
Q70VI1;Q9VFC7;Q95U15;C1C553;A0A0B4KG65;C1C529	Q70VI1;Q9VFC7;Q95U15;C1C553;A0A0B4KG65		Mf	tr|Q70VI1|Q70VI1_DROME Mf4 protein OS=Drosophila melanogaster OX=7227 GN=Mf PE=1 SV=1;tr|Q9VFC7|Q9VFC7_DROME Mf5 protein OS=Drosophila melanogaster OX=7227 GN=Mf PE=1 SV=2;tr|Q95U15|Q95U15_DROME GH14252p OS=Drosophila melanogaster OX=7227 GN=Mf PE=1 SV=1;t	222480000	62559000	215240000	166360000	49078000	185760000	133600000	36751000	127520000	166990000	35240000	400470000	162100000	36722000	380590000	13659000	2333300	34634000	72804000	46162000	364000000	58051000	42692000	391220000	58887000	42734000	414850000	0.21362	0.2642	0.22985	0.14439	0.14408	0.16305	0.78234	0.75205	0.75936	0.98997	1.0815	0.90326	1.9144	2.1766	2.076	4.8546	5.8255	5.8431
D5A7M1;Q9W1C9	D5A7M1;Q9W1C9	Ejaculatory bulb-specific protein 3	PebIII-RA;PebIII	tr|D5A7M1|D5A7M1_DROME Ejaculatory bulb protein III, isoform B OS=Drosophila melanogaster OX=7227 GN=EbpIII PE=1 SV=1;sp|Q9W1C9|PEB3_DROME Ejaculatory bulb-specific protein 3 OS=Drosophila melanogaster OX=7227 GN=EbpIII PE=2 SV=2	412810000	335310000	93793000	678200000	561480000	135010000	534860000	405480000	85830000	529160000	973920000	115840000	562800000	877980000	100450000	1338000000	2253000000	239040000	145030000	955320000	357570000	206500000	1120100000	476090000	281460000	1280500000	533360000	0.80089	0.73378	0.68468	1.7629	1.6117	1.5723	6.1612	6.0058	6.4814	0.18861	0.19336	0.17348	0.19498	0.19027	0.16836	2.4486	2.6268	2.7656
Q9VV75	Q9VV75		UQCR-C2	tr|Q9VV75|Q9VV75_DROME AT02348p OS=Drosophila melanogaster OX=7227 GN=UQCR-C2 PE=1 SV=1	245970000	196250000	92405000	378130000	324270000	137380000	290020000	237880000	103610000	256920000	125050000	479670000	177410000	87751000	357540000	11880000	4948000	23828000	49457000	90033000	356390000	50623000	99696000	420260000	53689000	121520000	461470000	0.84232	0.8328	0.80075	0.42994	0.41723	0.43423	1.7709	1.9049	2.1755	0.33542	0.33404	0.34336	1.565	1.6836	1.9324	5.9833	6.9961	7.3237
A4UZZ4;Q9XTL9	A4UZZ4;Q9XTL9	Alpha-1,4 glucan phosphorylase;Glycogen phosphorylase	GlyP	tr|A4UZZ4|A4UZZ4_DROME Alpha-1,4 glucan phosphorylase OS=Drosophila melanogaster OX=7227 GN=Glyp PE=1 SV=1;sp|Q9XTL9|PYG_DROME Glycogen phosphorylase OS=Drosophila melanogaster OX=7227 GN=Glyp PE=2 SV=2	908100000	377190000	1.6903e+09	914150000	316860000	1.7322e+09	744380000	268260000	1.5816e+09	238780000	97882000	339160000	266090000	98382000	315770000	14930000	6264300	20461000	103130000	108530000	348210000	88375000	100450000	364180000	107140000	149880000	501100000	0.39299	0.35635	0.35556	0.39066	0.37851	0.38633	1.0024	1.1673	1.3064	1.6873	1.7526	1.9479	1.1707	1.1889	1.1694	3.1316	3.6619	4.2673
O18404	O18404	3-hydroxyacyl-CoA dehydrogenase type-2	scu	sp|O18404|HCD2_DROME 3-hydroxyacyl-CoA dehydrogenase type-2 OS=Drosophila melanogaster OX=7227 GN=scu PE=1 SV=1	1.044e+09	745060000	218470000	952940000	801160000	180170000	956830000	705850000	199800000	554170000	427180000	232430000	436730000	369160000	207550000	33235000	28119000	15566000	98955000	360370000	342130000	84813000	281690000	300740000	118740000	470630000	484890000	0.80901	0.87659	0.84174	0.84258	0.98537	0.89867	3.6132	4.0708	5.0123	0.22357	0.20002	0.21133	0.39688	0.49804	0.44036	3.387	4.1272	4.1161
P92177-4;P92177-1;P92177-2;P92177	P92177-4;P92177-1;P92177-2;P92177	14-3-3 protein epsilon	14-3-3epsilon	sp|P92177-4|1433E_DROME Isoform C of 14-3-3 protein epsilon OS=Drosophila melanogaster OX=7227 GN=14-3-3epsilon;sp|P92177-1|1433E_DROME Isoform D of 14-3-3 protein epsilon OS=Drosophila melanogaster OX=7227 GN=14-3-3epsilon;sp|P92177-2|1433E_DROME Isoform	251010000	250730000	85606000	244820000	273310000	67145000	179490000	195180000	45283000	213410000	132010000	317650000	274460000	198570000	437910000	24850000	14669000	36697000	39520000	109100000	338290000	36611000	86820000	267000000	51278000	166120000	467710000	1.0491	1.1781	1.0352	0.57934	0.52963	0.61664	2.4382	2.5155	3.0752	0.16712	0.1766	0.18724	1.2601	1.3562	1.5322	9.5692	9.1979	8.7547
Q9VKX2	Q9VKX2	Malate dehydrogenase	Mdh1	tr|Q9VKX2|Q9VKX2_DROME Malate dehydrogenase OS=Drosophila melanogaster OX=7227 GN=Mdh1 PE=1 SV=2	1287200000	1.5056e+09	341690000	1.5159e+09	2.1025e+09	383160000	1220500000	1.5718e+09	325430000	561500000	700000000	165770000	614880000	779790000	199710000	34800000	50478000	13540000	121160000	530710000	332990000	97247000	492480000	328460000	146940000	808320000	523370000	1.1679	1.3407	1.2045	1.212	1.2239	1.2828	4.1449	5.0869	5.4173	0.25093	0.2412	0.25489	0.30201	0.29899	0.26232	2.7195	3.099	3.2972
Q9W229	Q9W229	40S ribosomal protein S24	RpS24	tr|Q9W229|Q9W229_DROME 40S ribosomal protein S24 OS=Drosophila melanogaster OX=7227 GN=RpS24 PE=1 SV=1	600510000	769300000	147400000	564900000	729450000	161950000	618640000	737920000	150530000	332050000	356600000	111960000	385530000	427740000	169860000	19119000	18627000	6595500	363860000	309720000	327500000	181340000	232890000	203900000	120110000	362610000	403730000	1.2786	1.2555	1.1868	1.1324	1.019	1.1707	0.639	4.3273	3.9859	0.22877	0.25781	0.21528	0.3381	0.35859	0.35607	1.6086	4.017	4.028
P29613;P29613-1	P29613;P29613-1	Triosephosphate isomerase	Tpi	sp|P29613|TPIS_DROME Triosephosphate isomerase OS=Drosophila melanogaster OX=7227 GN=Tpi PE=1 SV=3;sp|P29613-1|TPIS_DROME Isoform A of Triosephosphate isomerase OS=Drosophila melanogaster OX=7227 GN=Tpi	332270000	407110000	143060000	647450000	886630000	258650000	387270000	490570000	156950000	391350000	308800000	340190000	203810000	137980000	182420000	9226500	5048700	7798600	68334000	202770000	323040000	47365000	121600000	213140000	73328000	246980000	390130000	1.1958	1.3529	1.478	0.79621	0.75049	0.64313	2.2328	2.7325	3.0501	0.39027	0.30249	0.41765	0.77632	0.83188	0.88087	3.7251	4.0844	5.4706
O77134	O77134		ATPsynE	tr|O77134|O77134_DROME ATP synthase subunit e, mitochondrial OS=Drosophila melanogaster OX=7227 GN=ATPsynE PE=1 SV=1	154740000	78463000	49789000	385150000	212080000	112500000	250380000	205860000	75376000	212400000	99352000	528630000	173960000	75150000	407070000	19477000	4249200	41817000	33637000	64044000	318680000	9835800	27563000	190670000	9423300	45221000	192940000	0.46272	0.60196	0.69934	0.47796	0.42798	0.20687	2.9878	3.7106	4.6675	0.26005	0.29033	0.31979	2.0419	2.222	1.6932	14.183	15.693	19.485
Q8SYJ2	Q8SYJ2		ND-MLRQ	tr|Q8SYJ2|Q8SYJ2_DROME GEO09626p1 OS=Drosophila melanogaster OX=7227 GN=ND-MLRQ PE=1 SV=1	111220000	108080000	48866000	189820000	310460000	99081000	101620000	107110000	21168000	188900000	111880000	230520000	114970000	124630000	156570000	1784300	754690	2340500	60286000	129970000	311250000	19095000	43305000	108480000	36628000	205840000	253800000	1.3056	1.46	1.2514	0.49923	0.44073	0.52437	1.5733	2.4608	5.3076	0.26359	0.34402	0.17481	1.3292	1.4957	1.5545	4.1529	5.7779	6.3772
Q9VKI8	Q9VKI8			tr|Q9VKI8|Q9VKI8_DROME GH03305p OS=Drosophila melanogaster OX=7227 GN=GH26 PE=1 SV=1	788180000	827830000	257080000	805410000	1.0064e+09	244050000	627090000	650170000	178440000	336460000	470840000	82392000	308280000	448480000	77996000	26977000	40118000	6889600	123880000	458570000	309500000	123840000	442880000	288910000	203770000	839310000	560600000	1.0439	1.2962	1.1139	1.4347	1.5723	1.3023	3.8353	4.6239	4.7202	0.2895	0.2518	0.28153	0.21796	0.26139	0.19267	2.4097	2.843	3.058
P45594	P45594	Cofilin/actin-depolymerizing factor homolog	tsr	sp|P45594|CADF_DROME Cofilin/actin-depolymerizing factor homolog OS=Drosophila melanogaster OX=7227 GN=tsr PE=1 SV=1	165240000	109820000	97385000	170370000	130930000	94451000	147940000	88738000	94452000	197940000	125980000	332130000	141010000	76495000	246910000	22515000	12445000	41981000	47556000	69492000	301540000	22318000	49680000	218300000	36742000	66406000	284760000	0.73425	0.83709	0.68751	0.55129	0.66146	0.58197	2.6698	2.13	2.3669	0.53909	0.55798	0.70436	1.8488	1.6788	1.8609	8.3682	9.1036	6.4102
Q0KHZ6	Q0KHZ6			tr|Q0KHZ6|Q0KHZ6_DROME Electron transfer flavoprotein subunit beta OS=Drosophila melanogaster OX=7227 GN=Etfb PE=1 SV=1	726450000	1117900000	434810000	826760000	1.4988e+09	624430000	826910000	1340100000	494350000	245530000	222040000	102870000	374270000	500700000	235720000	93813000	91632000	47596000	67990000	320540000	301330000	65032000	327600000	283090000	78230000	344810000	283010000	0.98812	0.99944	0.94302	0.96643	1.0746	0.86097	3.7799	4.5688	3.7283	0.23383	0.20066	0.23583	0.43489	0.41102	0.4311	2.8769	2.9977	3.1902
Q7K5K3;Q7K5K3-2	Q7K5K3			sp|Q7K5K3|ODPB_DROME Pyruvate dehydrogenase E1 component subunit beta, mitochondrial OS=Drosophila melanogaster OX=7227 GN=Pdhb PE=1 SV=1	266780000	189590000	114230000	241550000	192420000	108300000	253100000	185970000	114900000	183860000	97293000	307680000	145470000	67649000	240600000	18533000	8890500	32120000	50528000	82345000	298830000	46596000	80835000	294640000	51023000	100440000	311680000	0.72873	0.76707	0.74909	0.55155	0.50827	0.44149	1.6723	1.688	2.1755	0.3402	0.40238	0.34937	1.5394	1.4684	1.3667	5.0908	5.0447	5.3084
A0A0B4K6C3;Q9VHS2	A0A0B4K6C3;Q9VHS2	Probable cytochrome c oxidase subunit 7A, mitochondrial	CG9603	tr|A0A0B4K6C3|A0A0B4K6C3_DROME Cytochrome c oxidase subunit 7A, isoform B OS=Drosophila melanogaster OX=7227 GN=COX7A PE=3 SV=1;sp|Q9VHS2|COX7A_DROME Cytochrome c oxidase subunit 7A, mitochondrial OS=Drosophila melanogaster OX=7227 GN=COX7A PE=3 SV=1	249060000	453870000	129910000	278580000	530540000	155680000	184640000	178770000	69306000	252470000	478590000	362000000	222800000	466850000	349040000	30029000	45779000	30585000	78756000	278360000	295620000	53212000	274510000	285710000	106690000	140870000	324710000	2.4976	2.0254	0.97355	1.6258	2.0176	1.1646	2.1235	5.2573	0.60569	0.32088	0.49177	0.35758	1.5127	1.619	1.1165	4.4044	4.8814	1.7858
M9PCE0;Q01604	M9PCE0;Q01604	Phosphoglycerate kinase	Pgk	tr|M9PCE0|M9PCE0_DROME Phosphoglycerate kinase OS=Drosophila melanogaster OX=7227 GN=Pgk PE=3 SV=1;sp|Q01604|PGK_DROME Phosphoglycerate kinase OS=Drosophila melanogaster OX=7227 GN=Pgk PE=2 SV=2	328110000	333960000	132840000	460190000	460990000	143040000	284230000	289240000	105840000	249190000	195750000	204410000	224400000	171150000	182100000	17202000	11206000	13506000	77769000	184410000	285850000	65687000	167360000	268210000	100020000	260490000	362110000	1.0423	1.0951	1.1373	0.72075	0.7733	0.79905	2.5377	2.5355	3.2115	0.34806	0.2891	0.31146	0.73278	0.75111	0.8195	3.4991	3.8832	4.5885
P19107	P19107	Phosrestin-1	Arr2	sp|P19107|ARRB_DROME Phosrestin-1 OS=Drosophila melanogaster OX=7227 GN=Arr2 PE=1 SV=2	0	0	0	0	0	0	0	0	0	508080000	322170000	131590000	444310000	323850000	102980000	28269000	19131000	6020800	107510000	270800000	285770000	87638000	197450000	213150000	125820000	310810000	325110000	NaN	NaN	NaN	0.72727	0.69194	0.73318	2.9181	3.5458	3.4402	NaN	NaN	NaN	0.22855	0.24271	0.2154	2.8557	3.5739	3.4609
X2JF59;Q9V3P0	X2JF59;Q9V3P0	Peroxiredoxin 1	Jafrac1	tr|X2JF59|X2JF59_DROME thioredoxin-dependent peroxiredoxin OS=Drosophila melanogaster OX=7227 GN=Prx2 PE=1 SV=1;sp|Q9V3P0|PRDX2_DROME Peroxiredoxin 2 OS=Drosophila melanogaster OX=7227 GN=Prx2 PE=1 SV=1	350620000	382740000	90618000	366840000	474550000	85493000	336630000	401300000	92158000	319340000	275450000	199660000	273550000	234020000	167940000	28397000	23904000	18127000	124970000	203360000	281860000	93051000	153660000	202780000	130270000	291160000	400650000	1.1722	1.3188	1.292	0.86434	0.91393	0.97105	2.9961	3.2526	3.4045	0.23043	0.20307	0.22406	0.52205	0.57979	0.63851	3.7083	4.3179	4.5987
A0A0B4JCW4;Q9VHJ8;A0A126GUR6;Q95U38	A0A0B4JCW4;Q9VHJ8;A0A126GUR6;Q95U38	Succinyl-CoA ligase subunit beta	skap	tr|A0A0B4JCW4|A0A0B4JCW4_DROME Succinate--CoA ligase [ADP-forming] subunit beta, mitochondrial OS=Drosophila melanogaster OX=7227 GN=ScsbetaA PE=1 SV=1;tr|Q9VHJ8|Q9VHJ8_DROME Succinate--CoA ligase [ADP-forming] subunit beta, mitochondrial OS=Drosophila mel	464610000	345730000	163600000	443430000	359490000	156690000	307460000	247290000	87295000	273430000	202580000	275510000	200480000	141460000	240130000	12914000	9251400	11615000	53245000	135580000	281660000	38297000	115580000	224210000	68575000	256840000	486870000	0.71531	0.80013	0.75428	0.70731	0.73018	0.66357	2.5774	2.9528	3.5228	0.22131	0.21188	0.20976	0.9367	1.0295	1.0241	4.6577	5.5075	5.7784
Q9V597	Q9V597	60S ribosomal protein L31	RpL31	sp|Q9V597|RL31_DROME Large ribosomal subunit protein eL31 OS=Drosophila melanogaster OX=7227 GN=RpL31 PE=1 SV=1	1165000000	1183300000	314450000	492260000	586990000	142790000	779940000	837390000	213050000	644010000	565840000	222520000	223170000	250250000	99426000	25300000	21395000	8191400	57434000	241660000	270480000	54460000	227520000	235150000	85005000	320070000	390380000	1.0966	1.3193	1.1011	0.92342	1.0417	0.99238	3.3086	4.6289	4.8201	0.23515	0.22921	0.19156	0.34023	0.49271	0.35305	3.6775	4.2673	4.7143
A0A126GUT1;Q9VGS2	A0A126GUT1;Q9VGS2	Translationally-controlled tumor protein homolog	Tctp	tr|A0A126GUT1|A0A126GUT1_DROME Translationally-controlled tumor protein homolog OS=Drosophila melanogaster OX=7227 GN=Tctp PE=3 SV=1;sp|Q9VGS2|TCTP_DROME Translationally-controlled tumor protein homolog OS=Drosophila melanogaster OX=7227 GN=Tctp PE=1 SV=1	619230000	914310000	181060000	563790000	846890000	104860000	553380000	678250000	117570000	235770000	342690000	77851000	244630000	317810000	90886000	49583000	64487000	15848000	83333000	322400000	267350000	74222000	331530000	270390000	96065000	458380000	350620000	1.1257	1.5021	1.2649	1.2472	1.1708	1.2664	3.7801	4.2663	4.4763	0.17946	0.17429	0.16533	0.26926	0.30754	0.30488	2.8186	3.0679	3.4574
P00408	P00408	Cytochrome c oxidase subunit 2	mt:CoII	sp|P00408|COX2_DROME Cytochrome c oxidase subunit 2 OS=Drosophila melanogaster OX=7227 GN=mt:CoII PE=3 SV=1	199770000	122280000	97168000	155880000	115930000	54480000	227100000	174120000	112840000	233460000	191490000	426370000	235960000	76612000	474210000	4662800	1872900	9369600	31440000	46571000	265740000	38404000	57261000	282510000	42782000	75052000	358620000	0.67775	0.70998	0.73696	0.41036	0.36276	0.48772	1.5645	1.5102	2.0561	0.36822	0.35065	0.40377	1.7734	1.7327	1.963	5.9536	6.4364	8.6841
Q9VVL7	Q9VVL7	Dihydrolipoyl dehydrogenase		tr|Q9VVL7|Q9VVL7_DROME Dihydrolipoyl dehydrogenase OS=Drosophila melanogaster OX=7227 GN=Dld PE=1 SV=1	145420000	119450000	69097000	223000000	182810000	86650000	190680000	147120000	71459000	128570000	62678000	206010000	123950000	48621000	219530000	5901700	2245900	10746000	43103000	53657000	265360000	29347000	47219000	221010000	49976000	95447000	400710000	0.65196	0.88033	0.74364	0.46756	0.4729	0.51835	1.4838	1.7482	1.4426	0.37933	0.34775	0.35927	1.4856	1.5266	1.9486	7.0052	7.3344	7.0988
A4V1N8;P35415	A4V1N8;P35415	Paramyosin, long form	Prm	tr|A4V1N8|A4V1N8_DROME FI03688p OS=Drosophila melanogaster OX=7227 GN=Prm PE=1 SV=1;sp|P35415|MYSP1_DROME Paramyosin, long form OS=Drosophila melanogaster OX=7227 GN=Prm PE=1 SV=1	144540000	39073000	353950000	140880000	44816000	386680000	147170000	51735000	324580000	61418000	32495000	329350000	65116000	34719000	332660000	15174000	4320500	42066000	22201000	19861000	261650000	40398000	27486000	245820000	23759000	19655000	348260000	0.22728	0.17194	0.19694	0.36777	0.24091	0.20545	0.40188	0.42209	0.47861	2.7206	2.4041	2.2912	5.7614	5.9337	6.1291	8.7715	10.339	12.403
Q9V9M7	Q9V9M7		RpL21	tr|Q9V9M7|Q9V9M7_DROME 60S ribosomal protein L21 OS=Drosophila melanogaster OX=7227 GN=RpL21 PE=1 SV=1	524700000	652560000	132180000	775540000	1.0507e+09	240890000	515080000	633010000	139840000	177240000	172500000	61734000	253720000	232310000	94542000	9444400	7678300	2224800	62349000	213050000	260370000	29080000	131850000	147460000	44307000	199130000	239370000	1.2714	1.1963	1.2004	0.97279	1.0044	0.869	3.4276	4.1829	4.2577	0.23576	0.21765	0.22676	0.28297	0.29825	0.2379	3.0102	3.2668	3.638
Q94522;Q9VDW7	Q94522	Succinyl-CoA ligase [ADP/GDP-forming] subunit alpha, mitochondrial	Scsalpha	sp|Q94522|SUCA_DROME Succinate--CoA ligase [ADP/GDP-forming] subunit alpha, mitochondrial OS=Drosophila melanogaster OX=7227 GN=Scsalpha1 PE=2 SV=3	298610000	202710000	115210000	403570000	274200000	95819000	309540000	205050000	120720000	181960000	117250000	197900000	137570000	90108000	156290000	17391000	10147000	21396000	46099000	124020000	259130000	29578000	89007000	181600000	34312000	102590000	218100000	0.68542	0.68677	0.71307	0.58571	0.68254	0.65314	2.1264	2.7592	2.7658	0.24062	0.22678	0.20092	0.88644	1.0866	1.1892	5.1806	6.7606	6.1588
Q9VVH5	Q9VVH5		UQCR-Q	tr|Q9VVH5|Q9VVH5_DROME Cytochrome b-c1 complex subunit 8 OS=Drosophila melanogaster OX=7227 GN=UQCR-Q PE=1 SV=1	170790000	130700000	63009000	276230000	191340000	171610000	198450000	169790000	93653000	139440000	52321000	228060000	129640000	52677000	225970000	12300000	5517200	22039000	55298000	69846000	257360000	32852000	42947000	174640000	63369000	99138000	404580000	0.76604	0.72819	0.87563	0.42148	0.43943	0.32383	1.3741	1.181	1.561	0.36087	0.33413	0.38531	1.6437	1.4864	1.6438	4.3946	5.5711	6.4098
Q8INA9;B7Z0L1;Q9VES3;A8JR25;P10674;B7Z0L0;A0A0B4KH94	Q8INA9;B7Z0L1;Q9VES3;A8JR25;P10674;B7Z0L0;A0A0B4KH94	Fasciclin-1	Fas1	tr|Q8INA9|Q8INA9_DROME Fasciclin 1, isoform C OS=Drosophila melanogaster OX=7227 GN=Fas1 PE=1 SV=1;tr|B7Z0L1|B7Z0L1_DROME Fasciclin 1, isoform E OS=Drosophila melanogaster OX=7227 GN=Fas1 PE=1 SV=1;tr|Q9VES3|Q9VES3_DROME FI05280p OS=Drosophila melanogaster	0	0	0	0	0	0	0	0	0	162280000	30468000	289980000	114600000	22512000	217380000	8993800	1572000	19016000	39605000	41343000	255730000	39116000	40990000	259570000	36888000	44565000	307410000	NaN	NaN	NaN	0.17527	0.17133	0.19789	1.1792	1.297	1.2986	NaN	NaN	NaN	1.6327	1.9109	1.9809	7.2281	8.7859	8.1899
P05389	P05389	60S acidic ribosomal protein P2	RpLP2	sp|P05389|RLA2_DROME Large ribosomal subunit protein P2 OS=Drosophila melanogaster OX=7227 GN=RpLP2 PE=1 SV=1	506770000	575390000	91178000	516550000	629330000	102600000	505830000	604300000	104900000	234820000	229420000	88380000	190400000	207030000	86256000	252820000	239010000	88913000	64130000	237570000	249460000	39490000	163340000	187430000	38641000	173790000	206820000	1.2306	1.3096	1.0786	0.92785	1.0033	0.92315	3.3477	4.6948	4.2149	0.19225	0.18873	0.17191	0.33224	0.33777	0.33498	3.6769	4.0979	4.4495
F3YDF6;A0A0B4LH71;A0A4D6K1Y5;A0A4D6K595;Q960T2-3;Q960T2-4;Q960T2-5;Q960T2-2;Q960T2	F3YDF6;A0A0B4LH71;A0A4D6K1Y5;A0A4D6K595;Q960T2-3;Q960T2-4;Q960T2-5;Q960T2-2;Q960T2	Synapse-associated protein of 47 kDa	Sap47-RI;Sap47	tr|F3YDF6|F3YDF6_DROME MIP08376p OS=Drosophila melanogaster OX=7227 GN=Sap47 PE=1 SV=1;tr|A0A0B4LH71|A0A0B4LH71_DROME Synapse-associated protein 47kD, isoform K OS=Drosophila melanogaster OX=7227 GN=Sap47 PE=1 SV=1;tr|A0A4D6K1Y5|A0A4D6K1Y5_DROME Synapse-as	0	0	0	0	0	0	0	0	0	61856000	21138000	124160000	29158000	16964000	67225000	73571000	13131000	147440000	27368000	32408000	249280000	26609000	35388000	268270000	21604000	34088000	206910000	NaN	NaN	NaN	0.34103	0.60087	0.22175	1.1964	1.2188	1.3561	NaN	NaN	NaN	1.7873	1.5409	1.8899	8.1192	9.6157	8.2538
L0MPS3;Q9V496	L0MPS3;Q9V496	Apolipophorins;Apolipophorin-2;Apolipophorin-1	Rfabg	tr|L0MPS3|L0MPS3_DROME Apolipophorin, isoform B OS=Drosophila melanogaster OX=7227 GN=apolpp PE=1 SV=1;sp|Q9V496|APLP_DROME Apolipophorins OS=Drosophila melanogaster OX=7227 GN=apolpp PE=1 SV=2	172630000	322020000	50066000	162100000	358500000	52433000	113720000	245830000	39060000	298090000	490180000	112350000	317140000	665950000	74867000	25339000	47840000	11166000	81455000	473680000	247730000	78506000	519110000	207270000	117360000	843640000	373330000	1.8525	2.1723	1.8977	1.7259	2.0878	1.8411	6.6565	7.3072	7.7907	0.13764	0.14239	0.13405	0.13949	0.13879	0.12542	2.4662	2.6818	2.8367
P55841	P55841	60S ribosomal protein L14	RpL14	sp|P55841|RL14_DROME Large ribosomal subunit protein eL14 OS=Drosophila melanogaster OX=7227 GN=RpL14 PE=1 SV=1	555150000	636950000	121240000	441690000	500640000	82760000	407360000	451440000	76213000	226920000	239140000	80622000	192050000	218910000	57370000	12798000	13778000	5734200	68016000	200080000	247360000	51620000	243170000	217320000	85810000	339990000	304900000	1.0736	1.1383	1.1862	0.84409	1.131	1.2857	2.4742	3.7088	3.4215	0.17387	0.21179	0.18265	0.34931	0.26475	0.34817	3.3548	3.6335	3.257
P54385;P54385-2;Q8IMY1;A0A0C4DHE7	P54385;P54385-2;Q8IMY1;A0A0C4DHE7	Glutamate dehydrogenase, mitochondrial;Glutamate dehydrogenase	Gdh	sp|P54385|DHE3_DROME Glutamate dehydrogenase, mitochondrial OS=Drosophila melanogaster OX=7227 GN=Gdh PE=1 SV=2;sp|P54385-2|DHE3_DROME Isoform C of Glutamate dehydrogenase, mitochondrial OS=Drosophila melanogaster OX=7227 GN=Gdh;tr|Q8IMY1|Q8IMY1_DROME Glut	23235000	19798000	13537000	25218000	23001000	16158000	14639000	12888000	8588500	78900000	24106000	270660000	99747000	32715000	333300000	4518900	1245100	20886000	26082000	28365000	245230000	18444000	18096000	195360000	33333000	29598000	287840000	0.97153	0.88647	0.88833	0.25193	0.31695	0.30197	1.2731	1.1115	1.4056	0.62664	0.73152	0.49523	3.218	3.3682	3.592	10.905	11.903	12.723
A0A0B4LGS4;P54611	A0A0B4LGS4;P54611	V-type proton ATPase subunit E	Vha26	tr|A0A0B4LGS4|A0A0B4LGS4_DROME Vacuolar H[+]-ATPase 26kD subunit, isoform C OS=Drosophila melanogaster OX=7227 GN=Vha26 PE=3 SV=1;sp|P54611|VATE_DROME V-type proton ATPase subunit E OS=Drosophila melanogaster OX=7227 GN=Vha26 PE=1 SV=1	56651000	69338000	17396000	58743000	78651000	19905000	46085000	55028000	11531000	195120000	79730000	152550000	202590000	85861000	153700000	11571000	5526500	12355000	78797000	110500000	245210000	65497000	102760000	223120000	75017000	122590000	279550000	1.1092	1.1187	1.1559	0.42817	0.42459	0.46274	2.1929	2.4875	2.856	0.22437	0.25495	0.23579	0.69529	0.75478	0.89653	4.093	4.9419	5.0613
M9PHR2;P19351-3;M9PJM6;M9PHJ0;P19351-6;P19351-8;P19351-7;P19351-2;P19351;E1JJP0;P19351-9;P19351-13;P19351-11;X2JBP9;P19351-10	M9PHR2;P19351-3;M9PJM6;M9PHJ0;P19351-6;P19351-8;P19351-7;P19351-2;P19351;E1JJP0;P19351-9;P19351-13;P19351-11;X2JBP9;P19351-10	Troponin T, skeletal muscle	up	tr|M9PHR2|M9PHR2_DROME Upheld, isoform O OS=Drosophila melanogaster OX=7227 GN=up PE=1 SV=1;sp|P19351-3|TNNT_DROME Isoform 3 of Troponin T, skeletal muscle OS=Drosophila melanogaster OX=7227 GN=up;tr|M9PJM6|M9PJM6_DROME Upheld, isoform Q OS=Drosophila mela	50469000	12659000	82834000	97972000	38328000	250950000	59355000	14337000	149040000	16903000	3985900	58084000	23195000	6840700	78532000	33611000	10473000	149110000	23093000	29426000	244720000	9927600	16962000	148450000	8581500	15297000	155930000	0.29716	0.33893	0.28412	0.31745	0.32622	0.345	1.1548	1.6541	1.2868	1.9455	1.8813	1.9773	3.9702	3.2183	4.8933	9.0025	10.265	11.012
Q9VXI6;Q9VAW7	Q9VXI6	Cytochrome b-c1 complex subunit 7	UQCR-14	tr|Q9VXI6|Q9VXI6_DROME Cytochrome b-c1 complex subunit 7 OS=Drosophila melanogaster OX=7227 GN=UQCR-14 PE=1 SV=1	177080000	111270000	81350000	227240000	189510000	82707000	208000000	133960000	109790000	151220000	67883000	270210000	246660000	92343000	422410000	16763000	5183500	29238000	39194000	56576000	244100000	39405000	76576000	268440000	84497000	145430000	628750000	0.69342	0.83129	0.75687	0.43965	0.39002	0.36591	1.4737	1.8807	1.7786	0.38432	0.27941	0.38997	1.6848	1.5403	1.8959	5.8555	5.8623	6.8253
Q7KUB0;Q8IQA7;Q9VSI6;Q7KUB1;B7Z0E0	Q7KUB0;Q8IQA7;Q9VSI6;Q7KUB1;B7Z0E0	Isocitrate dehydrogenase [NADP]	Idh	tr|Q7KUB0|Q7KUB0_DROME Isocitrate dehydrogenase [NADP] OS=Drosophila melanogaster OX=7227 GN=Idh PE=1 SV=1;tr|Q8IQA7|Q8IQA7_DROME Isocitrate dehydrogenase [NADP] OS=Drosophila melanogaster OX=7227 GN=Idh PE=1 SV=1;tr|Q9VSI6|Q9VSI6_DROME Isocitrate dehydrog	1216300000	1319000000	273550000	1265000000	1.5828e+09	249870000	1202400000	1417200000	278220000	283310000	351890000	106540000	331630000	417260000	134060000	26822000	43379000	14508000	95753000	298980000	237860000	62445000	230200000	197930000	101500000	496050000	389380000	1.0408	1.175	1.1585	1.1625	1.195	1.1113	3.3682	3.6736	4.8208	0.20536	0.18354	0.19794	0.29081	0.30625	0.31392	2.8338	3.0075	3.2585
Q9VNX4	Q9VNX4		P5CDh1	tr|Q9VNX4|Q9VNX4_DROME Multifunctional fusion protein OS=Drosophila melanogaster OX=7227 GN=P5CDh1 PE=1 SV=1	5294300	1846200	4044000	7276700	2565000	4791600	10593000	3799500	7392500	125190000	32114000	288220000	142070000	31092000	296480000	4742100	2198000	12610000	31217000	29698000	234810000	29892000	30256000	235850000	47586000	38942000	339890000	0.36137	0.30118	0.39858	0.1828	0.21263	0.26228	1.2726	1.1484	1.2608	0.47759	0.53843	0.63773	2.0295	2.3313	2.1683	9.8449	9.2046	10.146
A0A0B4LFM0;P41044	A0A0B4LFM0;P41044	Calbindin-32	Cbp53E	tr|A0A0B4LFM0|A0A0B4LFM0_DROME Calbindin 53E, isoform B OS=Drosophila melanogaster OX=7227 GN=Cbp53E PE=4 SV=1;sp|P41044|CAB32_DROME Calbindin-32 OS=Drosophila melanogaster OX=7227 GN=Cbp53E PE=2 SV=1	0	0	0	0	0	0	0	0	0	131010000	32322000	189680000	145830000	32780000	196430000	49137000	13240000	81600000	58503000	39114000	234010000	30597000	27809000	185210000	38558000	37456000	219570000	NaN	NaN	NaN	0.18177	0.21531	0.17273	1.2509	1.375	1.4156	NaN	NaN	NaN	1.2339	1.3005	1.4406	7.5334	8.9014	8.2784
M9PBK5;P08570	M9PBK5;P08570	60S acidic ribosomal protein P1	RpLP1	tr|M9PBK5|M9PBK5_DROME Large ribosomal subunit protein P1 OS=Drosophila melanogaster OX=7227 GN=RpLP1 PE=3 SV=1;sp|P08570|RLA1_DROME Large ribosomal subunit protein P1 OS=Drosophila melanogaster OX=7227 GN=RpLP1 PE=1 SV=2	506500000	589800000	132370000	609240000	736550000	147040000	424060000	426920000	84412000	303380000	298130000	89415000	191910000	168160000	52354000	82590000	76752000	29083000	75999000	282330000	231730000	53080000	228690000	243950000	94182000	292310000	336790000	1.1155	1.2534	1.154	0.98451	1.1078	0.98462	3.0405	2.6907	2.5844	0.24366	0.19927	0.28174	0.25783	0.30603	0.36188	2.9149	2.4065	4.0322
X2JB25;P02844	X2JB25;P02844	Vitellogenin-2	Yp2	tr|X2JB25|X2JB25_DROME Yolk protein 2, isoform B OS=Drosophila melanogaster OX=7227 GN=Yp2 PE=1 SV=1;sp|P02844|VIT2_DROME Vitellogenin-2 OS=Drosophila melanogaster OX=7227 GN=Yp2 PE=1 SV=2	114880000	603110000	41930000	148070000	857140000	53225000	86764000	339300000	21687000	235160000	1230700000	64586000	266210000	1.649e+09	92035000	30613000	137830000	8356000	104290000	1353300000	231250000	89593000	1.0641e+09	184410000	127590000	2456000000	384340000	5.0826	6.3355	4.7764	4.4317	6.3678	4.8316	11.376	12.686	18.145	0.43106	0.38754	0.35535	0.1708	0.14849	0.38475	1.969	2.3163	2.486
X2JCX8;C0HKA1;C0HKA0	X2JCX8;C0HKA1;C0HKA0		RpS14b	tr|X2JCX8|X2JCX8_DROME GEO12513p1 OS=Drosophila melanogaster OX=7227 GN=RpS14b PE=2 SV=1;sp|C0HKA1|RS14B_DROME Small ribosomal subunit protein uS11B OS=Drosophila melanogaster OX=7227 GN=RpS14b PE=2 SV=1;sp|C0HKA0|RS14A_DROME Small ribosomal subunit protei	378380000	419130000	79308000	435110000	635820000	93668000	452070000	528530000	87890000	357180000	313640000	89586000	198700000	176460000	44228000	11659000	13622000	3944300	132900000	234470000	230930000	104180000	168350000	151410000	174630000	263530000	243320000	1.1032	1.2974	1.3047	0.99922	1.1815	1.1865	3.5789	3.2316	1.7895	0.2037	0.17386	0.17432	0.23627	0.32481	0.29078	2.9212	2.7071	2.964
Q9V3W0	Q9V3W0		UK114	sp|Q9V3W0|UK114_DROME RutC family protein UK114 OS=Drosophila melanogaster OX=7227 GN=UK114 PE=2 SV=1	853030000	768920000	244670000	877560000	838280000	203760000	978500000	795070000	233500000	343830000	411140000	86045000	266670000	349020000	40730000	18143000	16530000	5124800	117020000	278610000	224510000	87800000	174710000	118850000	152150000	363260000	219180000	0.96578	1.0106	0.9523	1.4425	1.3211	1.1463	3.8675	3.8724	3.5153	0.24582	0.23867	0.23343	0.23803	0.18076	0.28999	2.2112	2.2659	2.7853
P29829	P29829	Guanine nucleotide-binding protein subunit beta-2	Gbeta76C	sp|P29829|GBB2_DROME Guanine nucleotide-binding protein subunit beta-2 OS=Drosophila melanogaster OX=7227 GN=Gbeta76C PE=1 SV=3	0	0	0	0	0	0	0	0	0	247830000	47960000	214390000	181490000	40820000	183650000	4170900	968350	4052900	44250000	63752000	222210000	26321000	35970000	142120000	30044000	47707000	183430000	NaN	NaN	NaN	0.2382	0.23466	0.24723	1.4907	1.3068	1.5089	NaN	NaN	NaN	0.86039	1.0234	0.85944	4.7379	5.0591	5.2619
Q9VAM6	Q9VAM6	CDGSH iron-sulfur domain-containing protein 2 homolog	CG1458	sp|Q9VAM6|CISD2_DROME CDGSH iron-sulfur domain-containing protein 2 homolog OS=Drosophila melanogaster OX=7227 GN=Cisd2 PE=2 SV=1	359380000	300490000	146640000	483870000	422500000	163350000	238340000	191270000	92364000	315480000	154070000	587700000	292390000	126380000	435370000	22658000	9732300	104470000	31274000	47001000	218680000	45507000	54629000	226760000	54109000	135100000	475910000	0.84711	0.87176	0.7952	0.53599	0.48248	0.46169	1.5046	1.3199	2.3678	0.29291	0.25887	0.24762	1.7494	1.5831	2.5616	6.6553	4.2059	7.7969
Q9VWG1	Q9VWG1		HspB8	tr|Q9VWG1|Q9VWG1_DROME LD37169p OS=Drosophila melanogaster OX=7227 GN=dHspB8 PE=1 SV=1	137890000	65765000	96554000	173680000	97407000	155810000	122700000	73023000	104590000	117720000	50898000	159280000	81034000	37057000	104330000	91001000	33934000	95322000	33986000	76853000	217450000	20435000	34894000	131410000	32880000	77201000	243140000	0.50436	0.57971	0.61015	0.48106	0.54386	0.45749	1.6804	1.8059	1.8554	0.61131	0.73358	0.68879	0.97976	1.1564	0.97299	5.4123	5.6636	6.7732
Q9VBH8;Q9VHE5	Q9VBH8;Q9VHE5		RpL34a;RpL34b	tr|Q9VBH8|Q9VBH8_DROME Large ribosomal subunit protein eL34 OS=Drosophila melanogaster OX=7227 GN=RpL34a PE=1 SV=2;tr|Q9VHE5|Q9VHE5_DROME Large ribosomal subunit protein eL34 OS=Drosophila melanogaster OX=7227 GN=RpL34b PE=1 SV=1	458620000	472110000	127420000	544880000	712680000	192440000	260970000	317140000	111010000	161370000	166270000	55561000	93505000	99791000	36116000	20304000	19579000	18509000	77114000	185630000	215900000	14655000	105320000	120070000	87545000	166950000	259290000	1.1429	1.2627	1.0494	1.0135	0.95653	0.81144	3.9619	4.8913	2.165	0.27429	0.38659	0.18494	0.344	0.32039	0.90089	4.0259	13.953	2.6419
Q9VRL0	Q9VRL0		Cyt-c1	tr|Q9VRL0|Q9VRL0_DROME Cytochrome c1, isoform A OS=Drosophila melanogaster OX=7227 GN=Cyt-c1 PE=1 SV=1	147820000	140380000	86838000	195300000	159030000	91359000	156280000	126180000	74455000	111320000	63112000	221550000	113040000	61046000	246890000	4925700	2582500	10737000	27231000	43295000	214520000	15073000	37931000	146660000	30853000	46037000	218940000	0.70393	0.72953	0.59709	0.39286	0.41578	0.45175	1.3386	1.8086	1.4741	0.38811	0.32922	0.37628	1.5567	1.6	1.7454	5.7172	6.8035	7.6658
X2JCP8;P10987;P02572	X2JCP8;P10987;P02572	Actin-5C;Actin-42A	Act5C;Act42A	tr|X2JCP8|X2JCP8_DROME Actin 5C, isoform E OS=Drosophila melanogaster OX=7227 GN=Act5C PE=3 SV=1;sp|P10987|ACT1_DROME Actin-5C OS=Drosophila melanogaster OX=7227 GN=Act5C PE=1 SV=4;sp|P02572|ACT2_DROME Actin-42A OS=Drosophila melanogaster OX=7227 GN=Act42A	103200000	61333000	128260000	73996000	38560000	57712000	114930000	64107000	124820000	107970000	47376000	284600000	54535000	19698000	144970000	11491000	4746100	26986000	15550000	25365000	213970000	14844000	29085000	237680000	14756000	26161000	205220000	0.63346	0.54774	0.62198	0.44565	0.54351	0.61445	1.4231	1.9573	2.1064	0.65388	0.54033	0.48365	1.973	2.176	2.2561	11.005	11.778	14.714
P55830;P55830-2	P55830;P55830-2	40S ribosomal protein S3a	RpS3A	sp|P55830|RS3A_DROME Small ribosomal subunit protein eS1 OS=Drosophila melanogaster OX=7227 GN=RpS3A PE=1 SV=4;sp|P55830-2|RS3A_DROME Isoform B of Small ribosomal subunit protein eS1 OS=Drosophila melanogaster OX=7227 GN=RpS3A	381960000	452510000	86994000	384470000	493350000	82553000	347420000	388210000	72554000	294730000	278870000	97535000	153200000	171650000	53615000	12077000	16699000	4590100	93411000	197960000	208970000	61004000	154460000	157640000	110560000	234970000	267250000	1.0473	1.27	1.0773	0.94029	1.049	1.1755	3.5978	3.94	4.0857	0.19275	0.14487	0.20116	0.31292	0.33139	0.38492	3.4863	3.7042	4.0358
Q4ABD8;Q4AB94;Q4AB54;P02255;Q4ABE3	Q4ABD8;Q4AB94;Q4AB54;P02255;Q4ABE3	Histone H1	His1:CG33807;His1:CG33834;His1:CG33861;His1;His1:CG33801	tr|Q4ABD8|Q4ABD8_DROME Histone H1 OS=Drosophila melanogaster OX=7227 GN=His1:CG33807 PE=3 SV=1;tr|Q4AB94|Q4AB94_DROME Histone H1 OS=Drosophila melanogaster OX=7227 GN=His1:CG33834 PE=3 SV=1;tr|Q4AB54|Q4AB54_DROME Histone H1 OS=Drosophila melanogaster OX=72	31293000	9952300	34583000	43833000	20638000	53177000	62375000	28871000	71191000	24064000	5522800	95191000	43408000	12706000	100260000	63562000	24466000	246610000	14760000	17399000	208320000	9140600	19517000	136260000	7829400	10355000	122070000	0.43501	0.50929	0.55887	0.21804	0.26578	0.287	1.5113	1.8856	1.5924	1.0636	1.0719	1.1067	2.9562	3.0912	3.8557	15.863	12.182	14.168
Q9VM14;Q7KTK9;M9PCU4;M9PCG1;M9PCA2	Q9VM14;Q7KTK9;M9PCU4;M9PCG1;M9PCA2	Acetyltransferase component of pyruvate dehydrogenase complex		tr|Q9VM14|Q9VM14_DROME dihydrolipoyllysine-residue acetyltransferase OS=Drosophila melanogaster OX=7227 GN=muc PE=1 SV=1;tr|Q7KTK9|Q7KTK9_DROME dihydrolipoyllysine-residue acetyltransferase OS=Drosophila melanogaster OX=7227 GN=muc PE=1 SV=1;tr|M9PCU4|M9PC	122720000	83485000	54304000	178950000	118690000	77240000	105120000	71408000	40051000	80044000	37796000	150840000	66395000	31578000	136000000	6441000	1807800	10857000	35011000	52133000	202810000	18712000	26994000	127600000	29752000	46722000	204680000	0.69096	0.66852	0.68264	0.47747	0.54942	0.26126	1.534	1.7871	2.2986	0.38175	0.42461	0.38299	1.6112	1.8492	1.5364	5.1783	5.9981	6.7968
M9PBL3;P02828	M9PBL3;P02828	Heat shock protein 83	Hsp83	tr|M9PBL3|M9PBL3_DROME Heat shock protein 83 OS=Drosophila melanogaster OX=7227 GN=Hsp83 PE=3 SV=1;sp|P02828|HSP83_DROME Heat shock protein 83 OS=Drosophila melanogaster OX=7227 GN=Hsp83 PE=1 SV=1	407900000	499730000	92527000	411900000	501740000	93181000	291800000	343250000	62280000	153260000	156500000	107500000	157200000	166730000	106790000	6467200	6040500	7163500	33635000	109100000	202210000	22012000	76172000	130060000	38189000	174380000	247580000	1.1677	1.1436	1.114	0.90989	0.98899	0.9141	3.5508	3.5358	3.8009	0.14457	0.14841	0.14134	0.50947	0.52995	0.58141	5.1453	5.4902	6.0227
Q500Y7	Q500Y7		UQCR-6.4	tr|Q500Y7|Q500Y7_DROME GEO11443p1 OS=Drosophila melanogaster OX=7227 GN=UQCR-6.4 PE=2 SV=1	85413000	95357000	25932000	227730000	212400000	78603000	254450000	251460000	76744000	133680000	49449000	166510000	219350000	103120000	295860000	8285100	2200900	12408000	42452000	56936000	201420000	44410000	72291000	253750000	65860000	104360000	363680000	0.95369	0.7876	1.0055	0.44501	0.48026	0.29639	1.3396	1.5683	1.6725	0.26653	0.25036	0.3175	1.2514	1.2205	1.5608	4.4013	5.209	4.754
Q9VKE2	Q9VKE2		Cry	tr|Q9VKE2|Q9VKE2_DROME Crystallin, isoform A OS=Drosophila melanogaster OX=7227 GN=Crys PE=1 SV=2	0	0	0	0	0	0	0	0	0	16627000	3279600	62786000	9180800	4783000	22824000	703130	1193100	24316000	6227500	11999000	201360000	6729100	3556300	36237000	16475000	17045000	61766000	NaN	NaN	NaN	0.44728	0.7905	5.4787	1.2817	0.90625	0.64003	NaN	NaN	NaN	9.1349	2.8261	19.816	32.739	1.6613	2.3787
P25007;Q7K2I4;Q9VAW1	P25007	Peptidyl-prolyl cis-trans isomerase	Cyp1	sp|P25007|PPIA_DROME Peptidyl-prolyl cis-trans isomerase OS=Drosophila melanogaster OX=7227 GN=Cyp1 PE=1 SV=2	387940000	405600000	183600000	319680000	376590000	158700000	322820000	359750000	158240000	173080000	157860000	160530000	136960000	129360000	145980000	15945000	12915000	15709000	29252000	113280000	201330000	23192000	80881000	145990000	33890000	126560000	256660000	0.95551	1.0943	1.0435	0.82508	0.89457	1.0149	3.3442	3.5199	4.2555	0.24098	0.22231	0.23166	0.82332	0.90649	1.0847	5.7376	6.2271	6.9762
X2JEM4;Q9W334	X2JEM4;Q9W334	40S ribosomal protein S28	RpS28b	tr|X2JEM4|X2JEM4_DROME Small ribosomal subunit protein eS28 OS=Drosophila melanogaster OX=7227 GN=RpS28b PE=2 SV=1;sp|Q9W334|RS28_DROME Small ribosomal subunit protein eS28 OS=Drosophila melanogaster OX=7227 GN=RpS28b PE=1 SV=2	96078000	116100000	19349000	210910000	284560000	54398000	166620000	191540000	23168000	119160000	107560000	30649000	56370000	63304000	14202000	44457000	54419000	13343000	52106000	187460000	194010000	13427000	91773000	89756000	11591000	70182000	52170000	1.0285	1.2181	1.1294	0.92054	1.1796	1.3363	2.9629	6.4753	5.8744	0.18948	0.21792	0.13789	0.24222	0.22062	0.28862	3.1125	5.6727	5.5278
Q9VTK9;M9PI17;Q8IQF8;M9PF61	Q9VTK9;M9PI17;Q8IQF8;M9PF61			tr|Q9VTK9|Q9VTK9_DROME Aldo-keto reductase 1B, isoform A OS=Drosophila melanogaster OX=7227 GN=Akr1B PE=1 SV=2;tr|M9PI17|M9PI17_DROME Aldo-keto reductase 1B, isoform D OS=Drosophila melanogaster OX=7227 GN=Akr1B PE=1 SV=1;tr|Q8IQF8|Q8IQF8_DROME AT18092p OS	332860000	508440000	180480000	262240000	488150000	145260000	381820000	540130000	211640000	336920000	392800000	114500000	298030000	286770000	96153000	11863000	13226000	4956900	64185000	203430000	193350000	38706000	153640000	133510000	46074000	229980000	201550000	1.781	1.8959	1.7308	1.0936	1.0991	1.0164	4.2209	4.2929	4.7715	0.59129	0.51826	0.59612	0.30113	0.34861	0.41583	3.8222	3.6518	4.4748
X2JDU0;P50882	X2JDU0;P50882	60S ribosomal protein L9	RpL9	tr|X2JDU0|X2JDU0_DROME Large ribosomal subunit protein uL6 OS=Drosophila melanogaster OX=7227 GN=RpL9 PE=3 SV=1;sp|P50882|RL9_DROME Large ribosomal subunit protein uL6 OS=Drosophila melanogaster OX=7227 GN=RpL9 PE=1 SV=2	323850000	296600000	55766000	186790000	223570000	32087000	188530000	167340000	30199000	322880000	167020000	50768000	243630000	143840000	43316000	1500600	2080400	654020	248430000	167120000	192930000	105900000	76999000	75126000	144420000	112280000	117520000	0.94738	1.0924	1.1072	0.61618	0.73342	1.2145	3.2262	2.4727	1.9776	0.22748	0.19209	0.1955	0.1752	0.23325	0.43325	3.0046	2.0539	1.6504
A0A0B4K7G9;B7YZQ7;O77460	A0A0B4K7G9;B7YZQ7;O77460	Inorganic pyrophosphatase	Nurf-38	tr|A0A0B4K7G9|A0A0B4K7G9_DROME inorganic diphosphatase OS=Drosophila melanogaster OX=7227 GN=Nurf-38 PE=1 SV=1;tr|B7YZQ7|B7YZQ7_DROME inorganic diphosphatase OS=Drosophila melanogaster OX=7227 GN=Nurf-38 PE=1 SV=1;sp|O77460|IPYR_DROME Inorganic pyrophospha	477660000	473310000	206510000	428350000	445620000	118860000	421080000	406780000	144000000	148270000	140620000	104490000	147710000	135170000	119630000	13544000	11845000	8346500	51445000	145990000	189730000	37175000	115620000	159290000	49955000	170010000	195270000	0.93441	1.0584	0.93756	0.9209	0.93005	0.88892	2.5132	3.2766	3.4821	0.25333	0.24042	0.25003	0.48775	0.51894	0.61556	3.2393	3.8998	4.4754
Q9VQ61;Q8IPY3	Q9VQ61;Q8IPY3	Aspartate aminotransferase	Got2	tr|Q9VQ61|Q9VQ61_DROME Aspartate aminotransferase OS=Drosophila melanogaster OX=7227 GN=Got2 PE=1 SV=1;tr|Q8IPY3|Q8IPY3_DROME Aspartate aminotransferase OS=Drosophila melanogaster OX=7227 GN=Got2 PE=1 SV=1	270280000	512310000	137590000	312010000	566550000	132370000	235370000	406080000	111620000	195020000	255590000	125420000	204740000	278420000	130490000	11269000	13048000	7526200	48355000	186050000	186450000	25240000	114280000	116170000	36281000	207490000	169290000	1.8486	1.8405	1.5496	1.2059	1.2568	1.1761	4.2342	4.703	5.8556	0.38958	0.32617	0.3985	0.50467	0.51758	0.62553	3.7865	3.9888	4.0289
P20432;A1ZB72	P20432	Glutathione S-transferase 1-1	GstD1	sp|P20432|GSTD1_DROME Glutathione S-transferase D1 OS=Drosophila melanogaster OX=7227 GN=GstD1 PE=1 SV=1	303760000	192410000	81683000	440510000	285680000	114260000	336430000	174080000	73853000	307340000	190090000	126420000	480460000	266050000	188010000	16566000	10050000	7161900	51974000	156050000	186250000	39860000	108590000	149840000	48529000	163520000	192150000	0.61695	0.57618	0.56462	0.57755	0.52809	0.68465	2.88	3.019	3.497	0.22486	0.31247	0.24326	0.33654	0.339	0.41476	3.2106	3.5496	3.7637
M9PFF0;P41126	M9PFF0;P41126	60S ribosomal protein L13	RpL13	tr|M9PFF0|M9PFF0_DROME 60S ribosomal protein L13 OS=Drosophila melanogaster OX=7227 GN=RpL13 PE=1 SV=1;sp|P41126|RL13_DROME Large ribosomal subunit protein eL13 OS=Drosophila melanogaster OX=7227 GN=RpL13 PE=1 SV=1	283640000	317910000	59873000	281870000	349830000	55526000	233980000	282540000	52026000	173910000	166700000	60692000	143380000	124810000	46859000	30910000	25332000	15551000	45693000	158840000	184270000	35612000	141030000	139600000	48596000	172350000	187200000	1.144	1.0521	1.0638	0.89755	0.87524	0.9803	2.9653	3.9803	3.0047	0.20202	0.2179	0.1966	0.33135	0.32063	0.33286	3.6447	3.8316	4.4568
Q9VA83;A0A0B4KHF0	Q9VA83;A0A0B4KHF0	Ferritin	Fer2LCH	sp|Q9VA83|FRIL_DROME Ferritin light chain OS=Drosophila melanogaster OX=7227 GN=Fer2LCH PE=1 SV=1;tr|A0A0B4KHF0|A0A0B4KHF0_DROME Ferritin OS=Drosophila melanogaster OX=7227 GN=Fer2LCH PE=1 SV=1	230710000	871290000	60050000	218050000	1.0599e+09	54508000	193600000	756850000	48180000	309010000	715650000	72227000	315540000	953860000	71371000	18965000	44504000	5186600	69754000	528430000	183440000	49096000	448550000	145580000	115210000	849230000	262170000	3.9976	4.8324	3.8946	2.3677	2.7885	2.6064	6.8131	7.8232	7.9785	0.39202	0.37427	0.3542	0.32728	0.24591	0.38423	2.081	2.637	2.5829
Q7KN94	Q7KN94		wal	tr|Q7KN94|Q7KN94_DROME Electron transfer flavoprotein subunit alpha OS=Drosophila melanogaster OX=7227 GN=wal PE=1 SV=1	456450000	376190000	107520000	520170000	541300000	121870000	543370000	520720000	136910000	332290000	250110000	134990000	326750000	261780000	139090000	15324000	12528000	7258000	51862000	175080000	183280000	55991000	190590000	192910000	64713000	260840000	290240000	0.89903	1.009	0.92665	0.83741	0.80624	0.8835	3.0136	3.692	4.3993	0.24618	0.20347	0.22666	0.37194	0.3747	0.45028	3.3362	3.6336	3.9288
Q7JUS9	Q7JUS9		CG9090-RA	tr|Q7JUS9|Q7JUS9_DROME MIP16332p OS=Drosophila melanogaster OX=7227 GN=Mpcp1 PE=1 SV=1	23204000	4850200	40680000	16881000	3269900	35209000	25933000	5607200	44054000	84177000	22307000	272380000	125310000	20916000	401680000	6391700	622820	21770000	43832000	39057000	182930000	29968000	12199000	197860000	24931000	11538000	201570000	0.24556	0.269	0.20671	0.18022	0.12884	0.13462	0.43942	0.58025	0.59615	1.8693	1.777	1.6615	3.0764	2.9458	2.9995	5.3967	6.2716	6.9429
Q95T29;Q7JPS2	Q95T29;Q7JPS2		igl	tr|Q95T29|Q95T29_DROME GEO06276p1 OS=Drosophila melanogaster OX=7227 GN=igl PE=1 SV=1;tr|Q7JPS2|Q7JPS2_DROME Igloo, isoform A OS=Drosophila melanogaster OX=7227 GN=igl PE=1 SV=1	0	0	0	0	0	0	0	0	0	166610000	16697000	115940000	216930000	115370000	193930000	354660000	96608000	361400000	66570000	109910000	179260000	83972000	95689000	142500000	24399000	93298000	132820000	NaN	NaN	NaN	0.10079	0.45136	0.31019	0.9158	1.1503	3.617	NaN	NaN	NaN	0.68447	1.1376	1.2763	2.5612	3.6523	6.3221
Q9VJZ4	Q9VJZ4		ND-B22	tr|Q9VJZ4|Q9VJZ4_DROME NADH dehydrogenase [ubiquinone] 1 beta subcomplex subunit 9 OS=Drosophila melanogaster OX=7227 GN=ND-B22 PE=1 SV=1	92074000	57495000	37423000	113380000	78020000	39828000	69277000	41830000	22437000	71235000	24412000	135930000	57485000	23734000	117020000	3126300	701660	6844900	22143000	42436000	179100000	13386000	31160000	124460000	15511000	28578000	142270000	0.61477	0.75913	0.61606	0.46166	0.42747	0.25208	1.4477	2.5344	1.8359	0.35289	0.32313	0.31113	1.9782	2.0623	1.823	5.6015	6.0994	6.4274
M9PH99;P20228;X2J8B3;Q24062	M9PH99;P20228	Glutamate decarboxylase	Gad1	tr|M9PH99|M9PH99_DROME Glutamic acid decarboxylase 1, isoform D OS=Drosophila melanogaster OX=7227 GN=Gad1 PE=3 SV=1;sp|P20228|DCE_DROME Glutamate decarboxylase OS=Drosophila melanogaster OX=7227 GN=Gad1 PE=1 SV=2	0	0	0	0	0	0	0	0	0	128190000	26391000	173280000	121520000	22964000	205990000	7935800	696300	12902000	28399000	28323000	178880000	21267000	24825000	173590000	27464000	34519000	235580000	NaN	NaN	NaN	0.17302	0.15459	0.20378	1.1543	1.1323	1.2213	NaN	NaN	NaN	1.2132	1.1655	1.1722	5.3115	4.9418	5.7581
E1JHQ1;P20477	E1JHQ1;P20477	Glutamine synthetase;Glutamine synthetase 1, mitochondrial	Gs1	tr|E1JHQ1|E1JHQ1_DROME Glutamine synthetase OS=Drosophila melanogaster OX=7227 GN=Gs1 PE=1 SV=1;sp|P20477|GLNA1_DROME Glutamine synthetase 1, mitochondrial OS=Drosophila melanogaster OX=7227 GN=Gs1 PE=2 SV=3	199160000	171940000	63358000	149180000	133940000	63955000	130750000	124450000	61620000	199650000	167180000	131150000	103530000	81672000	69842000	7157800	5441100	4484000	41758000	124730000	175260000	53713000	140900000	175000000	46913000	136320000	145210000	0.87784	0.80318	0.84969	1.0421	1.02	0.86653	3.2454	3.647	3.7481	0.1568	0.2378	0.28673	0.67536	0.617	0.69906	4.0289	3.8478	3.7059
M9PDU4;Q94519-2;Q94519	M9PDU4;Q94519-2;Q94519	Acyl carrier protein;Acyl carrier protein, mitochondrial	ND-ACP;mtacp1	tr|M9PDU4|M9PDU4_DROME Acyl carrier protein OS=Drosophila melanogaster OX=7227 GN=ND-ACP PE=1 SV=1;sp|Q94519-2|ACPM_DROME Isoform 1 of Acyl carrier protein, mitochondrial OS=Drosophila melanogaster OX=7227 GN=ND-ACP;sp|Q94519|ACPM_DROME Acyl carrier protei	113440000	71805000	35569000	116920000	92101000	42823000	114500000	89211000	43112000	0	0	0	46873000	30229000	128550000	60863000	30539000	131040000	18666000	36660000	173370000	33843000	63832000	288520000	17154000	42722000	184090000	0.64473	0.8005	0.83563	NaN	0.4232	0.40925	1.5405	1.978	2.1324	0.24835	0.30698	0.37701	NaN	1.6354	1.7252	6.1736	7.6178	7.8171
Q9VTP4	Q9VTP4	60S ribosomal protein L10a-2	RpL10Ab	sp|Q9VTP4|R10AB_DROME Large ribosomal subunit protein uL1 OS=Drosophila melanogaster OX=7227 GN=RpL10Ab PE=1 SV=2	297440000	316110000	69885000	305220000	347410000	72145000	251040000	259860000	64687000	201160000	178190000	67475000	148400000	129300000	50875000	14896000	17654000	6697000	43196000	147070000	171060000	40123000	143130000	162760000	114290000	395970000	452210000	1.0829	1.1688	1.1195	0.89645	1.0182	1.1361	3.3505	4.1328	3.6218	0.24416	0.16204	0.19682	0.32684	0.36406	0.52733	3.5352	3.2035	3.89
Q9VJ19	Q9VJ19		RpL30	tr|Q9VJ19|Q9VJ19_DROME Large ribosomal subunit protein eL30 OS=Drosophila melanogaster OX=7227 GN=RpL30 PE=1 SV=1	266070000	313560000	70588000	326480000	422530000	71360000	211740000	286350000	50179000	136030000	147720000	29955000	159340000	167680000	59092000	14599000	14168000	5305500	51358000	173380000	170470000	30704000	117400000	100770000	8425700	66786000	72871000	1.2212	1.2394	1.2876	1.0746	1.1006	0.9671	2.4328	3.0213	4.7142	0.22723	0.2141	0.27907	0.27532	0.30468	0.28684	2.4728	2.4957	5.4344
M9PG76;P19889	M9PG76;P19889	60S acidic ribosomal protein P0	RpLP0	tr|M9PG76|M9PG76_DROME 60S acidic ribosomal protein P0 OS=Drosophila melanogaster OX=7227 GN=RpLP0 PE=3 SV=1;sp|P19889|RLA0_DROME Large ribosomal subunit protein uL10 OS=Drosophila melanogaster OX=7227 GN=RpLP0 PE=1 SV=1	349850000	380300000	67483000	555160000	707120000	141020000	339960000	358500000	72362000	248570000	234500000	77791000	192740000	185860000	61457000	5975900	6145700	2203600	48125000	143140000	168210000	25198000	99134000	106420000	63643000	215980000	211100000	1.1299	1.1781	1.0339	0.86029	0.98388	0.93782	3.0704	3.8402	3.8991	0.18319	0.18882	0.18655	0.30327	0.34473	0.38547	3.7406	3.3733	4.2679
M9PB84;P31009	M9PB84;P31009	40S ribosomal protein S2	RpS2	tr|M9PB84|M9PB84_DROME Small ribosomal subunit protein uS5 OS=Drosophila melanogaster OX=7227 GN=RpS2 PE=3 SV=1;sp|P31009|RS2_DROME Small ribosomal subunit protein uS5 OS=Drosophila melanogaster OX=7227 GN=RpS2 PE=1 SV=2	569790000	611320000	121070000	555720000	631030000	123820000	393070000	413440000	89638000	300320000	281940000	102410000	216560000	225670000	76910000	8960600	7376900	2790500	55462000	144440000	168100000	54674000	188050000	197700000	113130000	317720000	360740000	1.023	1.1958	1.1196	0.95981	0.93431	0.77974	3.4901	4.1458	3.8898	0.2333	0.21359	0.20885	0.31304	0.33502	0.32251	3.598	3.8807	4.0059
P07486	P07486	Glyceraldehyde-3-phosphate dehydrogenase 1	Gapdh1	sp|P07486|G3P1_DROME Glyceraldehyde-3-phosphate dehydrogenase 1 OS=Drosophila melanogaster OX=7227 GN=Gapdh1 PE=2 SV=2	159930000	208910000	62769000	270680000	394870000	102150000	124580000	142970000	44111000	107320000	86605000	103880000	139130000	110320000	136140000	5661500	3938900	5812300	36185000	78592000	166450000	7906600	24063000	48735000	22190000	72876000	121210000	1.2178	1.2239	1.1402	0.88051	0.80347	0.72706	2.28	2.8361	3.0399	0.34371	0.28387	0.38021	0.95016	0.95914	0.96721	3.4152	4.6319	4.4961
Q9I7S8;F0JAN1	Q9I7S8;F0JAN1	Multifunctional protein ADE2;Phosphoribosylaminoimidazole-succinocarboxamide synthase;Phosphoribosylaminoimidazole carboxylase	ade5	sp|Q9I7S8|PUR6_DROME Bifunctional phosphoribosylaminoimidazole carboxylase/phosphoribosylaminoimidazole succinocarboxamide synthetase OS=Drosophila melanogaster OX=7227 GN=Paics PE=1 SV=2;tr|F0JAN1|F0JAN1_DROME PAICS bifunctional enzyme, isoform B OS=Droso	625130000	976030000	122540000	669540000	1279800000	110370000	657410000	1122600000	102350000	305130000	687510000	100920000	359880000	793930000	90433000	33349000	63885000	7621600	84791000	471120000	165670000	75889000	400730000	136130000	86084000	647570000	216070000	1.5303	1.7714	1.6719	1.9085	2.4557	2.0588	6.3474	7.4915	8.3013	0.15174	0.13305	0.12927	0.13426	0.1306	0.20494	2.2332	2.4961	2.6017
A0A0C4DHE8;Q9VH69	A0A0C4DHE8;Q9VH69	40S ribosomal protein S29	RpS29	tr|A0A0C4DHE8|A0A0C4DHE8_DROME Small ribosomal subunit protein uS14 OS=Drosophila melanogaster OX=7227 GN=RpS29 PE=1 SV=1;sp|Q9VH69|RS29_DROME Small ribosomal subunit protein uS14 OS=Drosophila melanogaster OX=7227 GN=RpS29 PE=1 SV=1	159000000	148010000	55180000	160780000	189050000	43228000	150400000	130340000	33604000	82512000	48812000	22095000	54338000	39662000	16832000	0	0	0	37476000	105720000	163350000	40397000	88766000	118920000	15047000	67805000	82664000	1.1993	1.2109	1.1366	0.68248	0.70487	NaN	3.6093	2.5569	3.1243	0.56445	0.41126	0.24786	0.30436	0.26851	NaN	3.9256	2.7236	4.5735
Q9VHN7;Q7KSU6;Q9VVP4	Q9VHN7;Q7KSU6			tr|Q9VHN7|Q9VHN7_DROME transketolase OS=Drosophila melanogaster OX=7227 GN=anon-WO0118547.344 PE=1 SV=3;tr|Q7KSU6|Q7KSU6_DROME transketolase OS=Drosophila melanogaster OX=7227 GN=anon-WO0118547.344 PE=1 SV=1	588180000	806240000	176350000	696200000	974070000	182320000	587850000	752610000	161950000	235680000	334920000	49984000	139650000	196000000	34350000	7679300	11023000	2080200	58173000	232130000	162690000	28979000	126370000	93129000	56313000	261110000	164530000	1.3015	1.35	1.2837	1.267	1.4814	1.4546	4.318	4.5269	5.1171	0.28161	0.25274	0.27574	0.20184	0.26388	0.16574	2.7154	2.9855	3.501
E1JIJ5;P31409	E1JIJ5;P31409	V-type proton ATPase subunit B	Vha55	tr|E1JIJ5|E1JIJ5_DROME Vacuolar proton pump subunit B OS=Drosophila melanogaster OX=7227 GN=Vha55 PE=1 SV=1;sp|P31409|VATB_DROME V-type proton ATPase subunit B OS=Drosophila melanogaster OX=7227 GN=Vha55 PE=2 SV=1	28470000	34146000	7829600	65168000	83293000	18491000	33862000	43554000	8917800	196840000	81064000	162240000	249430000	97251000	197660000	8635400	2533900	5354500	36884000	68103000	162490000	20416000	46406000	117690000	39068000	93691000	225970000	1.1058	1.2203	1.0553	0.42902	0.4521	0.40844	2.0853	2.2199	2.7831	0.25889	0.2209	0.22802	0.8298	0.81353	0.8989	4.5152	5.1036	5.2619
X2JC35;P49630	X2JC35;P49630	60S ribosomal protein L36	RpL36	tr|X2JC35|X2JC35_DROME 60S ribosomal protein L36 OS=Drosophila melanogaster OX=7227 GN=RpL36 PE=2 SV=1;sp|P49630|RL36_DROME Large ribosomal subunit protein eL36 OS=Drosophila melanogaster OX=7227 GN=RpL36 PE=1 SV=1	304290000	331660000	57718000	348550000	403760000	50757000	420760000	536060000	81636000	253820000	232660000	63768000	154670000	132310000	34939000	38339000	29925000	14733000	49521000	148530000	161070000	42639000	123520000	146820000	47649000	166980000	172380000	1.1132	1.2124	1.2179	0.94679	1.109	1.0702	3.2219	2.9696	3.1717	0.17158	0.18328	0.19901	0.27836	0.28535	0.32714	3.5657	2.9463	3.1742
Q7KN97;Q0E9E2	Q7KN97;Q0E9E2	Pyruvate carboxylase	PCB	tr|Q7KN97|Q7KN97_DROME Pyruvate carboxylase OS=Drosophila melanogaster OX=7227 GN=Pcb PE=1 SV=1;tr|Q0E9E2|Q0E9E2_DROME Pyruvate carboxylase OS=Drosophila melanogaster OX=7227 GN=Pcb PE=1 SV=1	673550000	717870000	214160000	783700000	846040000	195640000	612720000	643000000	252040000	312500000	282790000	129050000	208410000	200410000	88770000	10928000	10334000	4166600	54982000	180040000	160020000	43077000	135890000	123960000	58515000	219910000	195220000	1.047	1.093	1.0274	0.94369	0.91777	0.99042	3.5517	4.0846	4.1027	0.21583	0.20152	0.21399	0.34039	0.35225	0.37482	2.8177	2.9737	3.5316
Q7JR58	Q7JR58			tr|Q7JR58|Q7JR58_DROME Enoyl-CoA hydratase, mitochondrial OS=Drosophila melanogaster OX=7227 GN=Echs1 PE=1 SV=1	312680000	323570000	125560000	357170000	395820000	97528000	316090000	368120000	107240000	273870000	282380000	133440000	205590000	187250000	75842000	18874000	29176000	7637700	58984000	162280000	158880000	38735000	172480000	145380000	63483000	225100000	202110000	1.1147	1.064	1.1111	0.92207	0.86021	0.94729	3.458	3.7055	4.1852	0.24273	0.21889	0.26192	0.37628	0.33646	0.35406	2.6161	2.9556	3.1119
Q9W0A8	Q9W0A8		RpL23A	tr|Q9W0A8|Q9W0A8_DROME FI01658p OS=Drosophila melanogaster OX=7227 GN=RpL23A PE=1 SV=1	191050000	229840000	33002000	301610000	340750000	47525000	235430000	281010000	43710000	166750000	149490000	47789000	117340000	115900000	34534000	29374000	42147000	8560700	35986000	108020000	158330000	28878000	123500000	157940000	20699000	102160000	109010000	1.1182	1.1588	1.0992	0.87048	0.99698	0.93845	3.2224	4.0912	4.9203	0.22887	0.17845	0.17222	0.24341	0.19983	0.25447	3.1986	3.584	4.8644
Q9Y119	Q9Y119		Tps1	tr|Q9Y119|Q9Y119_DROME BcDNA.GH08860 OS=Drosophila melanogaster OX=7227 GN=Tps1 PE=1 SV=1	1.6179e+09	1333800000	294230000	1.7156e+09	1.7511e+09	291320000	1321600000	1253200000	226440000	244510000	329480000	44710000	193000000	315790000	42386000	9862700	14882000	2053900	83576000	282470000	158100000	61819000	252870000	129750000	78752000	334770000	197090000	0.80528	1.052	0.98756	1.4917	1.5607	1.4513	3.8694	4.0738	4.208	0.16812	0.15993	0.16141	0.13703	0.16834	0.13988	1.7546	1.8336	2.1449
X2JGP4;P54399;P54399-2	X2JGP4;P54399;P54399-2	Protein disulfide-isomerase	Pdi	tr|X2JGP4|X2JGP4_DROME Protein disulfide-isomerase OS=Drosophila melanogaster OX=7227 GN=Pdi PE=3 SV=1;sp|P54399|PDI_DROME Protein disulfide-isomerase OS=Drosophila melanogaster OX=7227 GN=Pdi PE=2 SV=1;sp|P54399-2|PDI_DROME Isoform D of Protein disulfide-	308110000	579790000	49119000	380490000	780410000	61415000	277610000	551430000	46519000	203000000	298830000	78497000	171960000	260890000	60339000	17185000	22492000	4427900	53314000	264510000	157130000	33324000	165760000	98099000	58526000	332920000	202130000	1.9408	2.0073	2.0107	1.3925	1.5305	1.4948	5.2913	6.1522	6.2031	0.17667	0.095083	0.12083	0.26789	0.24934	0.28699	2.8398	3.279	3.3666
P41093	P41093	60S ribosomal protein L18a	RpL18A	sp|P41093|RL18A_DROME Large ribosomal subunit protein eL20 OS=Drosophila melanogaster OX=7227 GN=RpL18A PE=1 SV=1	198140000	239280000	101500000	274840000	335640000	130370000	201180000	219650000	47522000	109680000	103600000	36336000	143730000	118280000	52970000	6844100	6105500	2309400	48956000	144660000	156550000	22037000	86745000	91982000	39092000	142560000	157060000	1.1876	1.1887	1.1328	0.96991	0.85243	0.97913	3.074	3.3462	4.5101	0.24242	0.19213	0.18643	0.30056	0.33953	0.38968	3.8169	3.9963	5.0895
X2JCV2;Q24388	X2JCV2;Q24388	Larval serum protein 2	Lsp2	tr|X2JCV2|X2JCV2_DROME Larval serum protein 2, isoform B OS=Drosophila melanogaster OX=7227 GN=Lsp2 PE=3 SV=1;sp|Q24388|LSP2_DROME Larval serum protein 2 OS=Drosophila melanogaster OX=7227 GN=Lsp2 PE=2 SV=2	36781000	133240000	11912000	29838000	121700000	9776500	8431500	43560000	4380300	75504000	237160000	33639000	134120000	397340000	42863000	5396800	16849000	4367700	51985000	370740000	155470000	14468000	152340000	39348000	83354000	523180000	224530000	4.9817	5.2568	4.7413	3.9477	3.7992	3.8172	9.7679	10.227	10.943	0.34889	0.42191	0.5061	0.34499	0.34418	0.38725	3.6943	3.0514	4.3859
Q9VAN7;Q9VGB6	Q9VAN7		Pglym78	tr|Q9VAN7|Q9VAN7_DROME Phosphoglycerate mutase OS=Drosophila melanogaster OX=7227 GN=Pglym78 PE=1 SV=2	208890000	166490000	72775000	317340000	298150000	103040000	187680000	137270000	65490000	150780000	81558000	145480000	136890000	90067000	143190000	6756800	5383100	6850500	36921000	61319000	152860000	24014000	46706000	124540000	68129000	93221000	211840000	0.75265	1.0736	0.80537	0.61158	0.59386	0.62617	1.7096	2.2213	2.2148	0.34071	0.32834	0.31128	0.87939	0.91701	0.76678	4.165	4.4074	3.74
Q9VW68	Q9VW68			tr|Q9VW68|Q9VW68_DROME (S)-3-amino-2-methylpropionate transaminase OS=Drosophila melanogaster OX=7227 GN=Gabat PE=1 SV=1	0	0	0	0	0	0	0	0	0	96769000	24670000	158620000	91658000	41094000	137820000	7941000	1430500	12484000	24008000	29780000	152380000	29320000	37491000	165270000	28057000	49900000	228230000	NaN	NaN	NaN	0.20566	0.25161	0.26791	1.4484	1.4862	1.9394	NaN	NaN	NaN	1.5795	1.4503	1.3775	7.7752	10.331	10.309
F3YDH0;P29844	F3YDH0;P29844	Heat shock 70 kDa protein cognate 3	Hsc70-3	tr|F3YDH0|F3YDH0_DROME Heat shock 70-kDa protein cognate 3, isoform E OS=Drosophila melanogaster OX=7227 GN=Hsc70-3 PE=1 SV=1;sp|P29844|BIP_DROME Endoplasmic reticulum chaperone BiP OS=Drosophila melanogaster OX=7227 GN=Hsc70-3 PE=1 SV=2	193370000	270020000	39734000	184920000	312950000	57169000	164860000	238950000	38330000	225130000	175740000	88406000	223470000	189980000	90959000	14019000	11316000	5680100	55963000	142950000	151960000	45259000	125460000	143240000	45255000	169930000	174460000	1.5703	1.8974	1.664	0.83244	0.87869	0.79366	2.5064	3.4399	3.4767	0.19642	0.18796	0.17916	0.39159	0.36357	0.31902	2.778	3.1272	3.3085
Q9VZI1;M9PE30	Q9VZI1;M9PE30	Transgelin	Chd64	tr|Q9VZI1|Q9VZI1_DROME Transgelin OS=Drosophila melanogaster OX=7227 GN=Chd64 PE=1 SV=2;tr|M9PE30|M9PE30_DROME Transgelin OS=Drosophila melanogaster OX=7227 GN=Chd64 PE=1 SV=1	62993000	69654000	19463000	108920000	154740000	30466000	39619000	41830000	8430800	92756000	68627000	52536000	95905000	60670000	44926000	10130000	4201900	2768500	38233000	97356000	150250000	30810000	89506000	133180000	31488000	63975000	83587000	1.2842	1.3897	1.2901	0.68162	0.76052	0.68667	2.7565	2.6788	3.0552	0.30572	0.32579	0.22082	0.52933	0.45816	0.5135	3.5541	3.4173	3.7254
Q9VQL7;B7Z001	Q9VQL7;B7Z001			tr|Q9VQL7|Q9VQL7_DROME Fatty acid synthase OS=Drosophila melanogaster OX=7227 GN=FASN1 PE=1 SV=1;tr|B7Z001|B7Z001_DROME Fatty acid synthase OS=Drosophila melanogaster OX=7227 GN=FASN1 PE=1 SV=2	1181300000	2378700000	227810000	1311900000	2860600000	221580000	1094700000	2303900000	195960000	304510000	641890000	70614000	261120000	647740000	67560000	16286000	34847000	4840200	89462000	433550000	149690000	61428000	358950000	110760000	84200000	548220000	177530000	1.9335	2.1923	2.0347	2.1298	2.2639	2.2184	5.6235	6.389	6.8652	0.13035	0.11646	0.12299	0.13494	0.1298	0.18561	1.8373	1.9653	2.1697
B7Z0X1;Q9W457	B7Z0X1;Q9W457	Serine hydroxymethyltransferase		tr|B7Z0X1|B7Z0X1_DROME Serine hydroxymethyltransferase OS=Drosophila melanogaster OX=7227 GN=Shmt PE=1 SV=1;tr|Q9W457|Q9W457_DROME Serine hydroxymethyltransferase OS=Drosophila melanogaster OX=7227 GN=Shmt PE=1 SV=1	599090000	928060000	195580000	698630000	1273600000	218840000	561840000	919890000	183770000	228330000	465180000	62454000	182000000	385010000	54691000	12180000	26130000	4658900	61479000	348040000	149030000	51135000	309810000	137410000	68808000	495270000	213790000	1.5194	1.9022	1.7038	1.9217	2.4035	2.1582	5.4823	6.1061	6.5542	0.26692	0.28809	0.31968	0.23956	0.22217	0.4048	2.3191	2.4857	2.8475
A0A0B4K6N1;Q8MLY8	A0A0B4K6N1;Q8MLY8	40S ribosomal protein S8	RpS8	tr|A0A0B4K6N1|A0A0B4K6N1_DROME 40S ribosomal protein S8 OS=Drosophila melanogaster OX=7227 GN=RpS8 PE=3 SV=1;sp|Q8MLY8|RS8_DROME Small ribosomal subunit protein eS8 OS=Drosophila melanogaster OX=7227 GN=RpS8 PE=1 SV=1	311340000	425820000	125470000	354220000	492430000	87909000	209860000	295610000	47748000	122310000	137670000	108680000	145920000	173630000	138580000	2138000	1966600	825120	21539000	76738000	148770000	32537000	105290000	99217000	21992000	73848000	79403000	1.2217	1.3141	1.1964	1.0459	1.1983	0.97425	3.14	3.3107	3.6351	0.2982	0.21331	0.18497	0.32648	0.37802	0.39029	2.9925	3.1874	4.1621
A4V0N4;Q27331;Q9VK47	A4V0N4;Q27331	V-type proton ATPase catalytic subunit A isoform 2	Vha68-2	tr|A4V0N4|A4V0N4_DROME H(+)-transporting two-sector ATPase OS=Drosophila melanogaster OX=7227 GN=Vha68-2 PE=1 SV=1;sp|Q27331|VATA2_DROME V-type proton ATPase catalytic subunit A isoform 2 OS=Drosophila melanogaster OX=7227 GN=Vha68-2 PE=1 SV=2	68089000	70336000	25847000	54137000	71190000	21255000	64102000	63150000	24722000	240140000	123760000	154610000	173900000	84247000	110750000	9383300	4412200	6653800	38924000	90081000	147960000	38872000	98252000	168180000	53903000	147930000	255560000	1.2353	1.1965	1.2332	0.5259	0.52781	0.46478	2.3887	2.3106	2.7296	0.29689	0.31636	0.37594	0.49432	0.56499	0.72403	3.3166	3.7985	3.9932
Q9VZQ8;Q8IRD4;Q8IRD3	Q9VZQ8;Q8IRD4;Q8IRD3	Glutathione peroxidase	PHGPx	tr|Q9VZQ8|Q9VZQ8_DROME Glutathione peroxidase OS=Drosophila melanogaster OX=7227 GN=Gtpx PE=1 SV=1;tr|Q8IRD4|Q8IRD4_DROME Glutathione peroxidase OS=Drosophila melanogaster OX=7227 GN=Gtpx PE=1 SV=1;tr|Q8IRD3|Q8IRD3_DROME Glutathione peroxidase OS=Drosophil	808810000	562970000	179700000	964060000	744120000	201610000	749080000	505810000	146160000	273010000	189080000	115340000	265550000	179750000	120640000	114720000	63553000	64201000	54020000	118860000	147150000	49237000	127640000	167600000	64317000	175110000	240570000	0.67145	0.78861	0.69908	0.67433	0.65495	0.56708	2.601	2.6443	3.054	0.19667	0.19449	0.18241	0.44925	0.41179	0.47491	3.5084	3.1804	4.0942
A1Z8H1	A1Z8H1		Cpr47Ea	tr|A1Z8H1|A1Z8H1_DROME Cuticular protein 47Ea OS=Drosophila melanogaster OX=7227 GN=Cpr47Ea PE=1 SV=1	62036000	21042000	219650000	49350000	16077000	178790000	53590000	17915000	273340000	0	0	0	280460000	77668000	112970000	14828000	3651000	117330000	127140000	35407000	146860000	80500000	21280000	75284000	0	0	0	0.56411	0.25161	0.34851	NaN	0.78252	0.36195	1.0963	0.49118	NaN	4.3179	5.3244	5.7572	NaN	3.7842	12.12	7.1386	2.0738	NaN
Q7KRU8;B8A405;A0A0B4KI27	Q7KRU8;B8A405;A0A0B4KI27	Ferritin	Fer1HCH;Fer1HCH-RD	sp|Q7KRU8|FRIH_DROME Ferritin heavy chain OS=Drosophila melanogaster OX=7227 GN=Fer1HCH PE=1 SV=1;tr|B8A405|B8A405_DROME Ferritin OS=Drosophila melanogaster OX=7227 GN=Fer1HCH PE=1 SV=1;tr|A0A0B4KI27|A0A0B4KI27_DROME Ferritin OS=Drosophila melanogaster OX=	145050000	620280000	50015000	159290000	778540000	63361000	102270000	457570000	39130000	209370000	499310000	67081000	230110000	694020000	77110000	25594000	79764000	8049200	63175000	521230000	146770000	49616000	403180000	125450000	66619000	576830000	190460000	4.5076	5.1958	4.9371	2.6243	3.3699	2.7656	7.7977	7.5787	7.9251	0.32778	0.44549	0.38133	0.29081	0.33161	0.28784	2.3652	2.3087	2.4756
P48159	P48159	60S ribosomal protein L23	RpL23	sp|P48159|RL23_DROME Large ribosomal subunit protein uL14 OS=Drosophila melanogaster OX=7227 GN=RpL23 PE=1 SV=2	392940000	432850000	88069000	757700000	1.0492e+09	191290000	513630000	564060000	145620000	194340000	185160000	65656000	164950000	150770000	57580000	19188000	19623000	6736000	35479000	118700000	144470000	34112000	145210000	140580000	98741000	346620000	388410000	1.0833	1.3273	1.1029	0.93234	0.96036	0.93024	3.0987	4.0112	3.9077	0.19374	0.23059	0.20219	0.35261	0.3066	0.37653	3.4506	3.6558	3.8504
A0A0B4LH50;P10981;P83967;M9PFZ6;P02574;P45891	A0A0B4LH50;P10981;P83967;M9PFZ6;P02574	Actin-87E;Actin, indirect flight muscle;Actin, larval muscle	Act87E;Act88F;Act79B	tr|A0A0B4LH50|A0A0B4LH50_DROME Actin 87E, isoform C OS=Drosophila melanogaster OX=7227 GN=Act87E PE=3 SV=1;sp|P10981|ACT5_DROME Actin-87E OS=Drosophila melanogaster OX=7227 GN=Act87E PE=1 SV=1;sp|P83967|ACT6_DROME Actin, indirect flight muscle OS=Drosophil	128260000	12338000	439610000	81488000	7012000	295220000	134910000	12394000	383910000	46852000	3251800	278420000	23807000	1019000	164830000	7036900	85596	24632000	11301000	4341400	144200000	10814000	4211100	105240000	14116000	4014900	176850000	0.10282	0.12315	0.080772	0.067942	0.095272	0.091352	0.47875	0.44873	0.31581	3.13	3.4339	2.814	5.1626	5.9188	6.1873	10.435	11.23	11.02
Q8IQQ0;Q9VVC5;A0A9F2H0Z0	Q8IQQ0;Q9VVC5;A0A9F2H0Z0		Nc73EF	tr|Q8IQQ0|Q8IQQ0_DROME 2-oxoglutarate dehydrogenase, mitochondrial OS=Drosophila melanogaster OX=7227 GN=Ogdh PE=1 SV=1;tr|Q9VVC5|Q9VVC5_DROME 2-oxoglutarate dehydrogenase, mitochondrial OS=Drosophila melanogaster OX=7227 GN=Ogdh PE=1 SV=2;tr|A0A9F2H0Z0|A0	113210000	123480000	42354000	90646000	102080000	34261000	87179000	96172000	30978000	115940000	41515000	130060000	110860000	39004000	118050000	4833200	1591800	5369300	26045000	41421000	144060000	13956000	25042000	83455000	22211000	39682000	140350000	1.1	0.97713	1.115	0.37998	0.38323	0.30114	1.669	1.8896	2.1521	0.27206	0.30639	0.28448	0.87489	0.90773	1.0168	4.6075	4.9481	5.4409
Q9W2U8	Q9W2U8		Neb-cGP	tr|Q9W2U8|Q9W2U8_DROME ATP synthase membrane subunit K, mitochondrial OS=Drosophila melanogaster OX=7227 GN=Neb-cGP PE=1 SV=1	115300000	117850000	35646000	96581000	118900000	29697000	83664000	111640000	28868000	141480000	75711000	244560000	180300000	119870000	348120000	23634000	9328300	40239000	23036000	23652000	142540000	42555000	73370000	267860000	28762000	52122000	176640000	1.0477	1.0632	1.315	0.53058	0.53402	0.3174	1.8377	1.7839	2.0749	0.26106	0.28395	0.34118	1.6272	1.5717	1.6449	5.6621	5.7161	6.429
Q1RL12;A4V0B5;Q24048-2;Q24048	Q1RL12;A4V0B5;Q24048-2;Q24048	Sodium/potassium-transporting ATPase subunit beta-2	nrv2	tr|Q1RL12|Q1RL12_DROME IP16413p OS=Drosophila melanogaster OX=7227 GN=nrv2 PE=1 SV=1;tr|A4V0B5|A4V0B5_DROME Nervana 2, isoform F OS=Drosophila melanogaster OX=7227 GN=nrv2 PE=1 SV=1;sp|Q24048-2|ATPB2_DROME Isoform 2.1 of Sodium/potassium-transporting ATPas	0	0	0	0	0	0	0	0	0	49914000	12690000	124300000	73673000	26038000	206110000	4401600	1033200	11863000	11601000	17123000	142330000	11965000	17374000	125670000	11346000	19141000	150350000	NaN	NaN	NaN	0.29583	0.22293	0.24036	1.1461	1.3197	1.1591	NaN	NaN	NaN	2.2681	2.201	2.4282	9.4575	8.8216	12.351
Q9VC18	Q9VC18			tr|Q9VC18|Q9VC18_DROME Bifunctional purine biosynthesis protein ATIC OS=Drosophila melanogaster OX=7227 GN=BEST:GH11240 PE=1 SV=1	367700000	679780000	120450000	455700000	911900000	138670000	349040000	649580000	102390000	196140000	483350000	51839000	179130000	472110000	54052000	9705400	22033000	2726200	56795000	344630000	141090000	36179000	259080000	83728000	53136000	443930000	150740000	1.7654	2.345	1.9122	2.4016	2.9539	2.548	6.7022	7.7335	8.5983	0.23919	0.22518	0.24439	0.18045	0.2176	0.26612	2.2032	2.6414	2.964
P55935;C6SUW3;Q95RG1	P55935;C6SUW3;Q95RG1	40S ribosomal protein S9	RpS9	sp|P55935|RS9_DROME Small ribosomal subunit protein uS4 OS=Drosophila melanogaster OX=7227 GN=RpS9 PE=1 SV=2;tr|C6SUW3|C6SUW3_DROME Small ribosomal subunit protein uS4 OS=Drosophila melanogaster OX=7227 GN=RpS9 PE=1 SV=1;tr|Q95RG1|Q95RG1_DROME Small riboso	313740000	363440000	86120000	299170000	379090000	82165000	289280000	347900000	73651000	110180000	118810000	44119000	171340000	181630000	128340000	12436000	13367000	4457900	32236000	107860000	138360000	23956000	100690000	112190000	42786000	164420000	186230000	1.0898	1.3507	1.187	1.0869	1.1249	1.1247	4.0787	5.0163	4.4015	0.21187	0.22692	0.18675	0.35697	0.4594	0.3586	4.5849	4.7657	4.5975
Q6IHY5	Q6IHY5			tr|Q6IHY5|Q6IHY5_DROME Cytochrome c oxidase subunit 7A-like 2, isoform A OS=Drosophila melanogaster OX=7227 GN=COX7AL2 PE=1 SV=1	0	0	0	0	0	0	0	0	0	110360000	16526000	283530000	86197000	7202800	109350000	3133500	2016000	6654300	35493000	19734000	137000000	85577000	61745000	436470000	117430000	83202000	598670000	NaN	NaN	NaN	0.21246	0.13903	0.90356	0.52898	0.59742	0.68765	NaN	NaN	NaN	2.142	1.7002	1.5462	3.4959	4.4068	5.0345
A0A0B4LFL3;O96827	A0A0B4LFL3;O96827	Probable elongation factor 1-beta	Ef1beta	tr|A0A0B4LFL3|A0A0B4LFL3_DROME Eukaryotic translation elongation factor 1 beta, isoform C OS=Drosophila melanogaster OX=7227 GN=eEF1beta PE=3 SV=1;sp|O96827|EF1B_DROME Probable elongation factor 1-beta OS=Drosophila melanogaster OX=7227 GN=eEF1beta PE=1 SV	170920000	257690000	47962000	252360000	383700000	56542000	159630000	259250000	40716000	79986000	85464000	48402000	151960000	153720000	75946000	33963000	37397000	24553000	58511000	118410000	136100000	61851000	127680000	141550000	92680000	221370000	245610000	1.5992	1.6531	1.7418	1.14	1.3199	1.2042	2.6362	4.1304	4.5148	0.20146	0.1882	0.17945	0.52557	0.50848	0.52737	3.4236	4.1522	5.2437
Q9V9W2;Q9V9W3	Q9V9W2;Q9V9W3		RpL6	tr|Q9V9W2|Q9V9W2_DROME Large ribosomal subunit protein eL6 OS=Drosophila melanogaster OX=7227 GN=RpL6 PE=1 SV=1;tr|Q9V9W3|Q9V9W3_DROME Large ribosomal subunit protein eL6 OS=Drosophila melanogaster OX=7227 GN=RpL6 PE=1 SV=1	201150000	242640000	74336000	200400000	225190000	130700000	135670000	200730000	120770000	95474000	87196000	44903000	86489000	97165000	35963000	10616000	8767500	2476200	37001000	119290000	135640000	25657000	110220000	117810000	19389000	81518000	75843000	1.1744	1.1385	1.1161	0.95425	0.90534	0.97176	3.3983	3.179	3.7047	0.22863	0.19695	0.16677	0.3945	0.32206	0.22606	4.2588	4.417	3.4941
Q9VZ19	Q9VZ19		antdh	tr|Q9VZ19|Q9VZ19_DROME Antdh OS=Drosophila melanogaster OX=7227 GN=Antdh PE=1 SV=1	0	0	0	0	0	0	0	0	0	215420000	154890000	48276000	271790000	210710000	56984000	23986000	19666000	5463100	47549000	158070000	135510000	33011000	127400000	112190000	57454000	214530000	193940000	NaN	NaN	NaN	0.75719	0.7319	0.83036	3.7241	3.4487	3.6201	NaN	NaN	NaN	0.2528	0.21073	0.27082	2.5762	2.7974	3.0976
P48588	P48588	40S ribosomal protein S25	RpS25	sp|P48588|RS25_DROME Small ribosomal subunit protein eS25 OS=Drosophila melanogaster OX=7227 GN=RpS25 PE=1 SV=3	202670000	276340000	44432000	164660000	225140000	32704000	202600000	269160000	45463000	128990000	156950000	44216000	112840000	132990000	36905000	26363000	23936000	7639400	33995000	112020000	134340000	48635000	157750000	144030000	69985000	182290000	206280000	1.3074	1.3231	1.2749	1.1815	1.3899	1.128	2.8478	3.9083	4.4453	0.21301	0.15728	0.22182	0.30777	0.33703	0.29386	2.903	2.7343	3.8327
X2J5G6;P32100	X2J5G6;P32100	60S ribosomal protein L7	RpL7	tr|X2J5G6|X2J5G6_DROME Ribosomal protein L7, isoform B OS=Drosophila melanogaster OX=7227 GN=RpL7 PE=3 SV=1;sp|P32100|RL7_DROME Large ribosomal subunit protein uL30 OS=Drosophila melanogaster OX=7227 GN=RpL7 PE=1 SV=2	266720000	293460000	79037000	327330000	373470000	80809000	111620000	117510000	46377000	137100000	119820000	65619000	189450000	192220000	75067000	3723600	2984700	1336700	67606000	114120000	134260000	16502000	67880000	74838000	33077000	120500000	130730000	1.1204	1.1756	1.23	0.77468	0.99254	0.8228	2.6687	3.7788	3.1904	0.23178	0.22788	0.79698	0.31008	0.39759	0.19127	3.0397	3.6036	3.5471
Q8SY77;M9NEX3;Q8IRR0	Q8SY77;M9NEX3;Q8IRR0			tr|Q8SY77|Q8SY77_DROME GEO11431p1 OS=Drosophila melanogaster OX=7227 GN=Dmel\CG3566 PE=1 SV=1;tr|M9NEX3|M9NEX3_DROME Uncharacterized protein, isoform D OS=Drosophila melanogaster OX=7227 GN=BcDNA:RH45308 PE=1 SV=1;tr|Q8IRR0|Q8IRR0_DROME Uncharacterized pro	193080000	216930000	58924000	218310000	275220000	69159000	178370000	177560000	40924000	169890000	151300000	131740000	66755000	75060000	56051000	941980	1312300	735500	26907000	91756000	131180000	24393000	85999000	132300000	20291000	93777000	122170000	1.0839	1.0946	1.044	0.94908	1.0997	0.82269	3.3302	3.818	4.3184	0.19518	0.38907	0.25718	0.50427	0.64057	0.63474	4.2221	4.0892	4.6362
P17704	P17704	40S ribosomal protein S17	RpS17	sp|P17704|RS17_DROME Small ribosomal subunit protein eS17 OS=Drosophila melanogaster OX=7227 GN=RpS17 PE=1 SV=2	156500000	193920000	26833000	246220000	280040000	52281000	240230000	321030000	44840000	127680000	124370000	43496000	28087000	30088000	8560400	1804400	1724800	511780	24426000	94764000	131100000	5504600	28638000	28220000	9036100	42915000	44552000	1.2814	1.3116	1.2779	0.98186	1.0297	0.80261	3.7617	5.0686	3.2781	0.24723	0.25835	0.20386	0.37058	0.28058	0.30931	5.0429	5.0828	2.9034
Q9W1H8	Q9W1H8		Thiolase	tr|Q9W1H8|Q9W1H8_DROME acetyl-CoA C-acyltransferase OS=Drosophila melanogaster OX=7227 GN=Mtpbeta PE=1 SV=1	354340000	243660000	88098000	366170000	249240000	102240000	332080000	227470000	85053000	158830000	112320000	76031000	143160000	100930000	77762000	3903800	2738800	1937500	33040000	97306000	128370000	36482000	83015000	117820000	31797000	107790000	154370000	0.64979	0.67952	0.69021	0.68456	0.7381	0.7864	2.9407	2.4139	3.6442	0.2238	0.21506	0.21628	0.36912	0.47244	0.42951	3.5716	3.5635	4.3036
Q9W402	Q9W402		ND-B16.6	tr|Q9W402|Q9W402_DROME NADH dehydrogenase [ubiquinone] 1 alpha subcomplex subunit 13 OS=Drosophila melanogaster OX=7227 GN=ND-B16.6 PE=1 SV=1	179420000	130180000	93242000	84634000	59246000	22981000	92463000	65130000	33574000	142730000	62276000	241720000	137970000	49455000	233150000	6741000	2621600	9718700	24639000	35994000	128010000	12808000	17863000	86598000	15694000	25545000	114940000	0.65158	0.62916	0.68341	0.37142	0.40326	0.38318	1.4843	1.4388	1.6215	0.3304	0.29727	0.31221	1.5621	1.7166	1.4908	4.4174	5.7867	6.3293
P41094	P41094	40S ribosomal protein S18	RpS18	sp|P41094|RS18_DROME Small ribosomal subunit protein uS13 OS=Drosophila melanogaster OX=7227 GN=RpS18 PE=1 SV=1	320000000	375330000	72224000	370950000	408030000	88712000	298800000	331410000	67418000	180240000	143890000	47771000	126760000	124350000	45581000	8633700	9278400	3190900	31543000	99417000	127050000	26822000	117200000	125830000	32494000	127550000	150710000	1.1116	1.2268	1.191	0.87197	0.92901	1.0001	3.2241	4.1122	4.3104	0.1794	0.1763	0.19253	0.291	0.31419	0.3011	4.0457	4.1214	4.8313
E1JI91;Q9VSW1	E1JI91;Q9VSW1		UGP	tr|E1JI91|E1JI91_DROME UTP--glucose-1-phosphate uridylyltransferase OS=Drosophila melanogaster OX=7227 GN=UGP PE=1 SV=1;tr|Q9VSW1|Q9VSW1_DROME UTP--glucose-1-phosphate uridylyltransferase OS=Drosophila melanogaster OX=7227 GN=UGP PE=1 SV=2	1.0329e+09	1345600000	260180000	1340600000	1.9721e+09	349870000	1131200000	1.5538e+09	323830000	193090000	272440000	81723000	114990000	184610000	30060000	8506800	10938000	2894200	55475000	195220000	126590000	40223000	182370000	131460000	56515000	260960000	147620000	1.3373	1.5601	1.3804	1.5053	1.5748	1.3799	3.9683	5.0815	5.3159	0.21168	0.18822	0.19378	0.27429	0.21706	0.28676	2.151	2.5248	2.4899
Q9I7Q5	Q9I7Q5		Cpr65Au	tr|Q9I7Q5|Q9I7Q5_DROME Cuticular protein 65Au, isoform A OS=Drosophila melanogaster OX=7227 GN=Cpr65Au PE=1 SV=2	276390000	44703000	148820000	223180000	27641000	189590000	85942000	38518000	95994000	363660000	85610000	141500000	202590000	68814000	105350000	214000000	73364000	118290000	60026000	119350000	126030000	37034000	96200000	83894000	22884000	52508000	69149000	0.19867	0.26887	NaN	0.27215	0.3436	0.33103	1.7598	2.3708	2.4884	0.7646	0.70016	0.76646	0.41376	0.47352	0.52912	1.995	1.9934	2.7562
Q9VQ29	Q9VQ29	Cytochrome b-c1 complex subunit Rieske, mitochondrial	RFeSP	sp|Q9VQ29|UCRI_DROME Cytochrome b-c1 complex subunit Rieske, mitochondrial OS=Drosophila melanogaster OX=7227 GN=RFeSP PE=1 SV=3	127530000	104040000	79552000	139910000	123200000	110010000	149000000	110390000	136060000	106890000	40417000	177850000	63072000	25157000	86223000	8433300	4621700	13304000	27045000	34263000	125410000	25101000	37226000	132750000	13532000	24669000	91298000	0.82289	0.72504	0.81199	0.45326	0.44938	0.58514	1.2844	1.1768	1.9481	0.32356	0.39282	0.35492	1.1358	1.1959	1.3368	3.9716	4.0738	5.5305
A0A0B4LG52;Q9W237	A0A0B4LG52;Q9W237	40S ribosomal protein S16	RpS16	tr|A0A0B4LG52|A0A0B4LG52_DROME 40S ribosomal protein S16 OS=Drosophila melanogaster OX=7227 GN=RpS16 PE=2 SV=1;sp|Q9W237|RS16_DROME Small ribosomal subunit protein uS9 OS=Drosophila melanogaster OX=7227 GN=RpS16 PE=1 SV=1	195060000	198610000	32830000	277900000	318190000	47510000	201570000	232460000	40731000	142340000	139360000	48089000	110610000	117150000	38380000	7252400	8208700	2244800	26797000	102890000	124750000	26614000	102320000	122760000	34260000	151280000	152590000	1.0859	1.2289	1.0701	0.99962	1.0739	1.1021	4.0453	3.6399	4.152	0.18677	0.17623	0.18979	0.30381	0.34526	0.24145	4.143	4.0828	4.1244
O77062;A0A6H2EIE0;A0A6H2EJK0	O77062;A0A6H2EIE0;A0A6H2EJK0	Amino acid transporter	Eaat1	tr|O77062|O77062_DROME Amino acid transporter OS=Drosophila melanogaster OX=7227 GN=Eaat1 PE=1 SV=1;tr|A0A6H2EIE0|A0A6H2EIE0_DROME Amino acid transporter OS=Drosophila melanogaster OX=7227 GN=Eaat1 PE=1 SV=1;tr|A0A6H2EJK0|A0A6H2EJK0_DROME Amino acid transp	7253000	9653900	3581600	7175300	12199000	4006500	3993000	7150200	3252100	50728000	18589000	145730000	53074000	14781000	137240000	1734900	682240	7753500	15213000	19621000	123520000	12180000	17520000	113280000	11813000	18852000	118170000	1.1993	1.4757	1.6067	0.36129	0.3042	0.37042	1.5637	1.4099	1.8063	0.39399	0.37539	0.69519	2.543	2.6288	3.3111	8.1346	8.4394	9.6122
Q9VWV6	Q9VWV6		Tsf1	tr|Q9VWV6|Q9VWV6_DROME Transferrin OS=Drosophila melanogaster OX=7227 GN=Tsf1 PE=1 SV=1	174820000	454390000	34040000	179570000	594420000	39778000	118890000	418650000	28666000	288800000	679750000	55582000	217780000	760880000	43411000	36180000	130240000	6697600	64801000	587010000	121470000	50337000	453770000	103060000	91904000	871270000	207720000	2.9744	3.1724	3.4072	2.3255	4.0343	3.788	9.3182	8.7321	10.401	0.16472	0.1978	0.20136	0.17105	0.1649	0.1561	2.1638	2.0065	2.1904
Q9W1G0	Q9W1G0	Probable transaldolase	Tal	sp|Q9W1G0|TALDO_DROME Probable transaldolase OS=Drosophila melanogaster OX=7227 GN=Taldo PE=2 SV=2	702190000	1.0212e+09	322070000	739150000	1.0111e+09	274610000	904630000	1157200000	325390000	266000000	350580000	115370000	232380000	306790000	97779000	6560700	8780500	2840000	32641000	130200000	119900000	48715000	222430000	166010000	52907000	266550000	222530000	1.4546	1.4474	1.4718	1.4676	1.4809	1.6245	4.1953	5.313	5.307	0.3099	0.28635	0.30226	0.27551	0.38329	0.61324	2.6195	3.5102	3.1247
P13060	P13060	Elongation factor 2	EF2	sp|P13060|EF2_DROME Eukaryotic translation elongation factor 2 OS=Drosophila melanogaster OX=7227 GN=eEF2 PE=1 SV=4	432960000	577440000	114570000	448430000	654710000	103950000	387970000	520540000	110060000	169730000	229850000	65191000	158480000	219660000	58051000	13581000	18115000	5169000	42875000	172290000	117770000	36179000	145840000	101170000	73258000	245950000	171370000	1.4204	1.6139	1.3784	1.2578	1.5082	1.3294	4.3097	5.9743	5.5652	0.18448	0.14809	0.13314	0.22591	0.27233	0.28635	2.9265	3.4967	3.3575
Q9GU68	Q9GU68	Eukaryotic translation initiation factor 5A	eIF-5A	sp|Q9GU68|IF5A_DROME Eukaryotic translation initiation factor 5A OS=Drosophila melanogaster OX=7227 GN=eEF5 PE=2 SV=2	188330000	226050000	55720000	253060000	355860000	53105000	250670000	295990000	63160000	33376000	33906000	11946000	219040000	141270000	31981000	47711000	38118000	17415000	210900000	133750000	117370000	153610000	88233000	72425000	426750000	140930000	99996000	1.1544	1.1875	1.102	1.0528	1.0032	0.97588	3.7443	4.3395	3.422	0.18315	0.17836	0.18462	0.33792	0.37294	0.40674	4.3248	4.2395	3.8268
Q9VYR1;Q76NR6	Q9VYR1;Q76NR6		regucalcin	tr|Q9VYR1|Q9VYR1_DROME Regucalcin homologue OS=Drosophila melanogaster OX=7227 GN=regucalcin PE=1 SV=1;tr|Q76NR6|Q76NR6_DROME Regucalcin, isoform D OS=Drosophila melanogaster OX=7227 GN=regucalcin PE=1 SV=1	514470000	536560000	120450000	517810000	563430000	137120000	563880000	629480000	148990000	358600000	359100000	84274000	522730000	543010000	103890000	30102000	31329000	12887000	53286000	252820000	116410000	60144000	276600000	135410000	128320000	542900000	277810000	1.0608	1.0523	1.109	1.0224	1.0883	0.96204	4.6751	4.7337	5.3451	0.16404	0.15422	0.20228	0.19318	0.18503	0.16825	2.0788	2.3378	2.4612
P10676	P10676	Neither inactivation nor afterpotential protein C	ninaC	sp|P10676|NINAC_DROME Neither inactivation nor afterpotential protein C OS=Drosophila melanogaster OX=7227 GN=ninaC PE=1 SV=2	0	0	0	0	0	0	0	0	0	110700000	30921000	108640000	108540000	34265000	104170000	6954500	2342600	7693400	19530000	34114000	115420000	21758000	39610000	124060000	40269000	52739000	181360000	NaN	NaN	NaN	0.24832	0.29675	0.26999	1.9669	2.063	2.2249	NaN	NaN	NaN	0.93037	0.89239	0.87034	7.1023	7.391	7.9778
Q7KV27;Q9VYD9	Q7KV27;Q9VYD9			tr|Q7KV27|Q7KV27_DROME alanine transaminase OS=Drosophila melanogaster OX=7227 GN=Alat PE=1 SV=1;tr|Q9VYD9|Q9VYD9_DROME alanine transaminase OS=Drosophila melanogaster OX=7227 GN=Alat PE=1 SV=3	280010000	281890000	113570000	301060000	325960000	89117000	245760000	264560000	107400000	148120000	114590000	106120000	121180000	151470000	94990000	16410000	4881300	44761000	26079000	86316000	113220000	21263000	76744000	102130000	37808000	136700000	169520000	1.0379	1.0323	0.9925	0.76624	0.80167	0.50123	3.2666	3.5191	3.8052	0.21618	0.23255	0.24743	0.63396	0.71187	0.78583	3.6878	4.0674	4.8805
P23625;A0A0B4JD15;Q0E9A7	P23625	G protein alpha q subunit	Galphaq	sp|P23625|GNAQ_DROME G protein alpha q subunit OS=Drosophila melanogaster OX=7227 GN=Galphaq PE=1 SV=2	0	0	0	0	0	0	0	0	0	70303000	10380000	117920000	85801000	15890000	148320000	6026200	1346600	11566000	14947000	17411000	112930000	13960000	34392000	117740000	19154000	18166000	175890000	NaN	NaN	NaN	0.21193	0.24395	0.21027	1.1502	1.0516	1.1295	NaN	NaN	NaN	1.6608	1.6673	2.2441	8.9737	10.586	9.478
P50887	P50887	60S ribosomal protein L22	RpL22	sp|P50887|RL22_DROME Large ribosomal subunit protein eL22 OS=Drosophila melanogaster OX=7227 GN=RpL22 PE=1 SV=2	563120000	611250000	260380000	450930000	551980000	198900000	452620000	481150000	121390000	233550000	195800000	61857000	193300000	212160000	57541000	46212000	36758000	8957000	46251000	132740000	111840000	47634000	171580000	151110000	85865000	284920000	269710000	1.0554	1.2002	1.1045	0.92038	1.1234	0.82528	4.3688	4.4534	4.6849	0.17834	0.14841	0.15057	0.22755	0.19598	0.19398	3.4592	3.0221	3.5352
Q9VM12	Q9VM12		CG5958-RA	tr|Q9VM12|Q9VM12_DROME MIP26555p1 OS=Drosophila melanogaster OX=7227 GN=Dmel\CG5958 PE=1 SV=1	832020000	1171200000	146510000	954600000	1442600000	147700000	666600000	929800000	109660000	320890000	571800000	58863000	290950000	610470000	52166000	14607000	30685000	1747000	81179000	309660000	111550000	56613000	189900000	67706000	107340000	351800000	134410000	1.3596	1.4733	1.5163	1.8059	1.9147	1.7877	3.8215	3.8941	5.5045	0.15978	0.14575	0.16496	0.14239	0.19099	0.13933	1.2371	1.4983	2.0391
Q9VQD7	Q9VQD7		ND-B17.2	tr|Q9VQD7|Q9VQD7_DROME NADH dehydrogenase [ubiquinone] 1 alpha subcomplex subunit 12 OS=Drosophila melanogaster OX=7227 GN=ND-B17.2 PE=1 SV=1	73599000	64266000	13451000	104830000	102210000	25185000	80105000	71592000	15338000	85352000	44096000	82917000	84349000	40090000	88809000	3478800	969800	3972400	21840000	43962000	111240000	20732000	42771000	111320000	23904000	60388000	149540000	0.88872	1.0712	1.0297	0.54367	0.52052	0.31672	1.5433	1.5041	3.3368	0.1805	0.24415	0.20837	1.0801	1.3786	0.98402	4.5479	4.8313	6.2587
P38979	P38979	40S ribosomal protein SA	sta	sp|P38979|RSSA_DROME Small ribosomal subunit protein uS2 OS=Drosophila melanogaster OX=7227 GN=sta PE=1 SV=3	294330000	307760000	57690000	243640000	274270000	55270000	284300000	331640000	62922000	186760000	163420000	60605000	158350000	163760000	66474000	7722100	8605700	2660500	33768000	89596000	110550000	38276000	126360000	142460000	42951000	136020000	168370000	1.1036	1.1728	1.1734	0.8403	1.0294	0.96799	3.0706	2.8358	3.6315	0.24382	0.26497	0.25182	0.27965	0.37144	0.48525	3.1638	3.7305	3.9782
A0A0B4JCU8;Q9V8M5	A0A0B4JCU8;Q9V8M5	3-hydroxyisobutyrate dehydrogenase;Probable 3-hydroxyisobutyrate dehydrogenase, mitochondrial	CG15093	tr|A0A0B4JCU8|A0A0B4JCU8_DROME 3-hydroxyisobutyrate dehydrogenase OS=Drosophila melanogaster OX=7227 GN=Dmel\CG15093 PE=1 SV=1;sp|Q9V8M5|3HIDH_DROME Probable 3-hydroxyisobutyrate dehydrogenase, mitochondrial OS=Drosophila melanogaster OX=7227 GN=CG15093 PE	71107000	160390000	21570000	96791000	189440000	36954000	118040000	235810000	35452000	157300000	325010000	47671000	118420000	255370000	37514000	17897000	25835000	4752800	31651000	165240000	108980000	19637000	103370000	56729000	22509000	167340000	97802000	2.214	1.9858	1.9951	1.6489	1.663	1.4508	4.5934	5.6478	6.6779	0.24432	0.51479	0.27636	0.30587	0.29634	0.26009	2.5765	3.188	3.5047
E1JJM9;P48149;Q7KR04	E1JJM9;P48149;Q7KR04	40S ribosomal protein S15Aa;40S ribosomal protein S15Ab	RpS15Aa;RpS15Ab	tr|E1JJM9|E1JJM9_DROME GEO07866p1 OS=Drosophila melanogaster OX=7227 GN=RpS15Aa PE=1 SV=1;sp|P48149|RS15A_DROME Small ribosomal subunit protein uS8A OS=Drosophila melanogaster OX=7227 GN=RpS15Aa PE=1 SV=2;sp|Q7KR04|RS15B_DROME Small ribosomal subunit prote	261660000	268400000	177870000	322870000	347050000	76620000	193600000	225010000	44986000	106730000	77970000	33777000	87547000	86973000	28117000	5980900	5407100	2173000	27071000	81329000	107240000	26475000	93369000	99733000	45711000	131440000	174180000	1.0721	1.2944	1.1606	0.83544	1.0906	0.89367	3.0156	3.8622	3.4261	0.1942	0.21654	0.22179	0.31994	0.31109	0.35676	3.7361	3.96	3.6043
Q7KVX1;Q9W4H6;Q7YU05	Q7KVX1;Q9W4H6;Q7YU05	Pyruvate dehydrogenase E1 component subunit alpha	l(1)G0334	tr|Q7KVX1|Q7KVX1_DROME Pyruvate dehydrogenase E1 component subunit alpha OS=Drosophila melanogaster OX=7227 GN=Pdha PE=1 SV=1;tr|Q9W4H6|Q9W4H6_DROME Pyruvate dehydrogenase E1 component subunit alpha OS=Drosophila melanogaster OX=7227 GN=Pdha PE=1 SV=2;tr|Q	237260000	185720000	116490000	170640000	128340000	82825000	149700000	118550000	57813000	89059000	59618000	133270000	100520000	73617000	137110000	2535800	1450200	4469200	27767000	36216000	106140000	22464000	35567000	99203000	23197000	40391000	119280000	0.73259	1.0404	0.84952	0.50247	0.75186	0.68436	1.7537	1.779	1.3734	0.35836	0.3217	0.35337	1.2106	1.4342	6.905	4.4734	4.4384	5.573
M9NEQ9;Q9VWG3	M9NEQ9;Q9VWG3	40S ribosomal protein S10b	RpS10b	tr|M9NEQ9|M9NEQ9_DROME Ribosomal protein S10b, isoform D OS=Drosophila melanogaster OX=7227 GN=RpS10b PE=1 SV=1;sp|Q9VWG3|RS10B_DROME Small ribosomal subunit protein eS10B OS=Drosophila melanogaster OX=7227 GN=RpS10b PE=1 SV=2	541340000	601770000	126140000	277520000	349860000	60783000	268170000	368210000	62078000	386390000	357770000	127820000	272090000	298280000	103800000	9458600	10057000	3938400	29856000	96892000	103790000	47379000	200390000	207770000	63727000	224840000	262150000	1.0657	1.2556	1.1641	1.3514	1.0538	1.0804	3.5592	4.2958	3.8295	0.17181	0.20721	0.20615	0.32638	0.34585	0.42813	3.2744	3.9396	3.5016
P04359;P04359-2	P04359;P04359-2	60S ribosomal protein L32	RpL32	sp|P04359|RL32_DROME Large ribosomal subunit protein eL32 OS=Drosophila melanogaster OX=7227 GN=RpL32 PE=1 SV=3;sp|P04359-2|RL32_DROME Isoform C of Large ribosomal subunit protein eL32 OS=Drosophila melanogaster OX=7227 GN=RpL32	184170000	227150000	66981000	235250000	302540000	90585000	159840000	195230000	65923000	40690000	33865000	17221000	11892000	15551000	5278200	0	0	0	28255000	96390000	103780000	13881000	45585000	52436000	12439000	50754000	59894000	1.1683	1.1767	1.2719	0.86133	1.3567	NaN	3.8353	2.6687	3.4601	0.32611	0.25818	0.35297	0.46206	0.51749	NaN	3.9338	3.209	3.936
Q8IPE8;Q9V397	Q8IPE8;Q9V397		Mtpalpha	tr|Q8IPE8|Q8IPE8_DROME enoyl-CoA hydratase OS=Drosophila melanogaster OX=7227 GN=Mtpalpha PE=1 SV=1;tr|Q9V397|Q9V397_DROME enoyl-CoA hydratase OS=Drosophila melanogaster OX=7227 GN=Mtpalpha PE=1 SV=1	327380000	226460000	90495000	453180000	337890000	119670000	396940000	289760000	93666000	162440000	140880000	94923000	159990000	132450000	100090000	9868600	6760100	4555100	45717000	70153000	103570000	23346000	69400000	100300000	41532000	87912000	138470000	0.68294	0.75876	0.7202	0.67555	0.78726	1.0034	3.0502	2.8961	2.8428	0.26647	0.26383	0.26785	0.45093	0.5379	0.4866	3.424	4.0188	3.765
Q9VL70	Q9VL70		yip2	tr|Q9VL70|Q9VL70_DROME HL08109p OS=Drosophila melanogaster OX=7227 GN=Acaa PE=1 SV=1	491230000	429350000	138980000	846890000	827800000	252250000	540100000	435730000	126960000	254640000	212080000	131760000	197960000	196500000	120450000	14446000	15063000	6181600	33334000	113710000	103400000	23724000	105190000	99221000	40437000	187230000	186370000	0.76502	0.86579	0.80439	1.0391	1.0623	0.9202	4.8398	3.8026	3.9473	0.20734	0.16966	0.19323	0.37754	0.36015	0.4095	3.4119	3.4009	4.1374
A1ZBJ2	A1ZBJ2			tr|A1ZBJ2|A1ZBJ2_DROME Very long-chain specific acyl-CoA dehydrogenase, mitochondrial OS=Drosophila melanogaster OX=7227 GN=Acadvl PE=1 SV=2	277370000	188080000	65301000	360740000	251520000	92351000	272100000	180320000	63730000	96574000	73657000	44263000	108990000	80259000	44035000	2516200	1294000	1043300	32516000	79324000	101370000	17970000	52011000	46886000	27129000	95923000	88144000	0.67758	0.65663	0.69192	0.73118	0.79339	0.82326	2.6154	2.9168	3.0947	0.20835	0.19933	0.20985	0.3858	0.3723	0.4509	2.3242	3.6257	3.1863
A0A0B4LHE7;Q9XZH6	A0A0B4LHE7;Q9XZH6	V-type proton ATPase subunit G	Vha13	tr|A0A0B4LHE7|A0A0B4LHE7_DROME V-type proton ATPase subunit G OS=Drosophila melanogaster OX=7227 GN=Vha13 PE=3 SV=1;sp|Q9XZH6|VATG_DROME V-type proton ATPase subunit G OS=Drosophila melanogaster OX=7227 GN=Vha13 PE=1 SV=1	36989000	25030000	4802900	0	0	0	31650000	26929000	7007000	95096000	13942000	76759000	139600000	94434000	105730000	8634700	2919700	4403600	14722000	31405000	101160000	29554000	50227000	183930000	18725000	41902000	127760000	0.71486	NaN	0.91294	0.22746	0.96577	0.41565	1.8478	1.8858	2.5581	0.12506	NaN	0.22238	0.76553	0.65906	0.71009	4.3061	5.6741	5.5801
G3M3A2;Q06559	G3M3A2;Q06559	40S ribosomal protein S3	RpS3	tr|G3M3A2|G3M3A2_DROME 40S ribosomal protein S3 OS=Drosophila melanogaster OX=7227 GN=RpS3 PE=1 SV=1;sp|Q06559|RS3_DROME Small ribosomal subunit protein uS3 OS=Drosophila melanogaster OX=7227 GN=RpS3 PE=1 SV=1	401570000	456040000	127290000	461200000	615310000	106820000	387690000	418000000	79028000	200560000	172310000	76374000	207620000	207440000	97704000	9872800	11196000	4659200	31843000	81724000	100630000	30244000	90635000	114160000	68119000	191390000	223890000	1.1236	1.2637	1.1411	0.85566	0.9018	1.2126	3.1811	3.7272	3.7914	0.20268	0.20721	0.19907	0.30753	0.30357	0.37034	3.3669	3.1064	3.5413
M9PHM6;Q9VS34	M9PHM6;Q9VS34	60S ribosomal protein L18	RpL18	tr|M9PHM6|M9PHM6_DROME Large ribosomal subunit protein eL18 OS=Drosophila melanogaster OX=7227 GN=RpL18 PE=3 SV=1;sp|Q9VS34|RL18_DROME Large ribosomal subunit protein eL18 OS=Drosophila melanogaster OX=7227 GN=RpL18 PE=1 SV=1	234350000	298540000	64058000	251330000	304330000	58045000	183670000	229370000	42531000	111020000	130440000	46037000	47842000	60430000	17796000	0	0	0	28076000	99409000	100370000	19139000	84967000	77037000	23213000	111170000	101210000	1.1773	1.346	1.243	1.2262	1.2043	NaN	3.9245	3.7727	4.3828	0.21763	0.19102	0.20547	0.31666	0.30997	NaN	4.2151	3.6916	3.5792
Q9VVU2;Q7JRQ1	Q9VVU2		RpL26	tr|Q9VVU2|Q9VVU2_DROME Large ribosomal subunit protein uL24 OS=Drosophila melanogaster OX=7227 GN=RpL26 PE=1 SV=1	179450000	186800000	51104000	197210000	236720000	63705000	177930000	212110000	40878000	79235000	71408000	31077000	10917000	14613000	7218200	7053000	4347600	2663900	29675000	80368000	99967000	24086000	92560000	94960000	7415100	32970000	24329000	1.0173	1.3331	1.306	0.75699	1.1119	1.0328	3.5517	3.5091	3.8411	0.26066	0.25865	0.2059	0.24622	0.61703	0.34701	3.6546	4.4158	3.196
M9NEU5;P25843	M9NEU5;P25843	Profilin	chic	tr|M9NEU5|M9NEU5_DROME Profilin OS=Drosophila melanogaster OX=7227 GN=chic PE=2 SV=1;sp|P25843|PROF_DROME Profilin OS=Drosophila melanogaster OX=7227 GN=chic PE=1 SV=1	48347000	39144000	33586000	57381000	47072000	37308000	101590000	77255000	64081000	48378000	26043000	75908000	60997000	30127000	71642000	0	0	0	12469000	33914000	98843000	9900900	25480000	72178000	10925000	35383000	121210000	0.87798	1.0601	0.84733	0.47775	0.55418	NaN	3.2712	3.0779	2.0207	0.66612	0.65235	0.62915	1.3966	1.015	NaN	5.7996	6.7106	8.5628
M9MRC9;P41092	M9MRC9;P41092	60S ribosomal protein L27a	RpL27A	tr|M9MRC9|M9MRC9_DROME Large ribosomal subunit protein uL15 OS=Drosophila melanogaster OX=7227 GN=RpL27A PE=2 SV=1;sp|P41092|RL27A_DROME Large ribosomal subunit protein uL15 OS=Drosophila melanogaster OX=7227 GN=RpL27A PE=1 SV=2	255790000	286680000	62141000	305070000	313910000	56823000	328330000	328780000	84985000	203680000	187390000	63585000	220030000	208580000	63494000	9773400	9339900	4071200	28603000	77769000	98509000	39062000	142040000	148950000	32800000	130580000	142200000	1.1552	1.2516	1.0629	0.93676	0.935	0.89009	2.6653	3.8453	3.6528	0.23467	0.19948	0.20794	0.26798	0.24741	0.35983	3.5776	3.88	3.9882
Q8SY19;Q8SY70	Q8SY19		Mgstl	tr|Q8SY19|Q8SY19_DROME glutathione transferase OS=Drosophila melanogaster OX=7227 GN=Mgstl PE=1 SV=1	204230000	313270000	71534000	145800000	195920000	54388000	180820000	254820000	64497000	91087000	105880000	33565000	85695000	108190000	29783000	11360000	11690000	3179200	49179000	194700000	97881000	33469000	83083000	135760000	14489000	80979000	57049000	1.3833	1.4252	1.3344	1.1194	1.2873	1.1042	3.6246	3.6832	4.9849	0.17825	0.22205	0.19077	0.23139	0.25596	0.22567	1.9891	2.8543	3.2916
A8Y560;O17445	A8Y560;O17445	Ribosomal protein L15;60S ribosomal protein L15	RpL15	tr|A8Y560|A8Y560_DROME Ribosomal protein L15 OS=Drosophila melanogaster OX=7227 GN=RpL15 PE=1 SV=2;sp|O17445|RL15_DROME Large ribosomal subunit protein eL15 OS=Drosophila melanogaster OX=7227 GN=RpL15 PE=1 SV=1	162210000	155080000	32892000	254420000	336190000	87058000	126680000	167920000	34081000	76303000	74334000	42012000	61415000	75190000	36193000	0	0	0	30540000	91264000	96720000	31598000	63900000	63309000	27665000	83686000	122700000	1.1012	1.1415	1.1345	0.99384	1.1482	NaN	3.3609	3.145	3.7983	0.26702	0.20155	0.19551	0.32384	0.39637	NaN	2.8521	2.6066	4.3482
Q9VM18	Q9VM18	Trehalose 6-phosphate phosphatase		tr|Q9VM18|Q9VM18_DROME Trehalose 6-phosphate phosphatase OS=Drosophila melanogaster OX=7227 GN=21430192 PE=1 SV=1	91616000	28286000	185990000	133210000	35345000	350290000	115370000	26090000	311140000	55418000	11582000	133230000	65938000	19309000	184560000	1460800	306680	12733000	10056000	9755000	96456000	11729000	4789800	95811000	17860000	10105000	220720000	0.28043	0.24129	0.23056	0.19959	0.30815	0.20721	1.0153	0.62519	0.5553	2.6194	2.4965	2.19	2.8776	2.5527	4.8671	8.0777	10.73	9.131
A0A0B4KHG5;A0A0B4KI35;A0A0B4KHK5;A0A0B4KHX5;P12024	A0A0B4KHG5;A0A0B4KI35;A0A0B4KHK5;A0A0B4KHX5;P12024	Chaoptin	chp	tr|A0A0B4KHG5|A0A0B4KHG5_DROME Chaoptin, isoform C OS=Drosophila melanogaster OX=7227 GN=chp PE=1 SV=1;tr|A0A0B4KI35|A0A0B4KI35_DROME Chaoptin, isoform E OS=Drosophila melanogaster OX=7227 GN=chp PE=1 SV=1;tr|A0A0B4KHK5|A0A0B4KHK5_DROME Chaoptin, isoform F	0	0	0	0	0	0	0	0	0	19563000	11992000	161930000	17761000	14623000	130470000	442690	251980	3059000	5158400	6569200	96255000	5684400	7043600	71823000	9216400	18718000	162950000	NaN	NaN	NaN	0.49292	0.52218	0.42903	1.3111	1.0675	1.7582	NaN	NaN	NaN	9.2259	11.468	6.6365	70.808	15.038	11.437
M9PEA6;O76927-2;O76927	M9PEA6;O76927-2;O76927	40S ribosomal protein S21	RpS21	tr|M9PEA6|M9PEA6_DROME 40S ribosomal protein S21 OS=Drosophila melanogaster OX=7227 GN=RpS21 PE=1 SV=1;sp|O76927-2|RS21_DROME Isoform E of Small ribosomal subunit protein eS21 OS=Drosophila melanogaster OX=7227 GN=RpS21;sp|O76927|RS21_DROME Small ribosomal	221780000	282340000	77899000	360240000	510370000	107280000	320110000	420950000	109220000	17707000	11537000	5243100	35680000	16469000	10726000	27200000	23409000	9406700	26362000	86523000	95711000	0	0	0	1123800	4491500	7011900	1.1595	1.3307	1.2598	0.73297	0.56547	1.053	3.3987	NaN	2.0143	0.268	0.22686	0.26754	0.25686	0.46977	0.37833	2.7463	NaN	3.6787
Q9W227	Q9W227	Peptidyl-prolyl cis-trans isomerase		tr|Q9W227|Q9W227_DROME Peptidyl-prolyl cis-trans isomerase OS=Drosophila melanogaster OX=7227 GN=Dmel\CG2852 PE=1 SV=1	79180000	205120000	36659000	113340000	311340000	40155000	87956000	204650000	33007000	78771000	129050000	40797000	69338000	133630000	40704000	35822000	63022000	20320000	21299000	121800000	95409000	9422400	60658000	45122000	21750000	175620000	127600000	2.3118	2.3348	2.3687	1.7507	1.8262	1.6065	5.5377	5.7082	7.2635	0.57643	0.25687	0.29252	0.47555	0.47896	0.56095	5.1384	4.5382	4.2714
P09180	P09180	60S ribosomal protein L4	RpL4	sp|P09180|RL4_DROME Large ribosomal subunit protein uL4 OS=Drosophila melanogaster OX=7227 GN=RpL4 PE=1 SV=2	230670000	252940000	86457000	253110000	305350000	109970000	269450000	283210000	115900000	145830000	136780000	62434000	95163000	84467000	40419000	5550400	4231100	2361000	27882000	75721000	94859000	20481000	82595000	81169000	25095000	86835000	98347000	1.1672	1.3774	1.1506	0.97281	0.94382	0.79908	3.4317	4.2837	4.3984	0.19044	0.20057	0.18422	0.32384	0.31468	0.47714	3.8654	4.1684	3.9637
Q9VGQ1	Q9VGQ1			tr|Q9VGQ1|Q9VGQ1_DROME Dihydrolipoyllysine-residue succinyltransferase component of 2-oxoglutarate dehydrogenase complex, mitochondrial OS=Drosophila melanogaster OX=7227 GN=Dlst PE=1 SV=1	172870000	95347000	47483000	103430000	81334000	43321000	78415000	53134000	35701000	85712000	36445000	160880000	61257000	28572000	115840000	11110000	4932500	22073000	10550000	16196000	94425000	17341000	29981000	144160000	17683000	19114000	98425000	0.84138	0.8481	0.80388	0.51317	0.53608	0.41206	1.8773	1.7421	1.5588	0.36242	0.36579	0.3868	1.7606	1.6912	1.4484	5.9468	8.591	8.8002
Q9I7R0;C0PDF4;M9PEW1	Q9I7R0;C0PDF4;M9PEW1		CG18815-RA	tr|Q9I7R0|Q9I7R0_DROME palmitoyl-protein hydrolase OS=Drosophila melanogaster OX=7227 GN=Apt1 PE=1 SV=1;tr|C0PDF4|C0PDF4_DROME palmitoyl-protein hydrolase OS=Drosophila melanogaster OX=7227 GN=Apt1 PE=1 SV=1;tr|M9PEW1|M9PEW1_DROME palmitoyl-protein hydrola	167820000	162540000	28544000	222900000	224990000	42986000	205740000	184660000	32486000	127710000	75989000	85047000	101770000	57006000	63853000	13160000	5583000	10256000	30995000	49918000	92276000	15477000	33683000	65432000	46748000	81351000	135840000	0.87463	1.0536	0.96851	0.51885	0.5053	0.46903	2.2816	2.4547	2.5926	0.15618	0.16218	0.21284	0.57489	0.60541	0.58828	3.5819	4.2879	4.0772
Q9TVP3;Q9TVP3-2;Q9TVP3-3	Q9TVP3;Q9TVP3-2;Q9TVP3-3	J domain-containing protein	jdp	sp|Q9TVP3|JDP_DROME J domain-containing protein OS=Drosophila melanogaster OX=7227 GN=jdp PE=2 SV=2;sp|Q9TVP3-2|JDP_DROME Isoform A of J domain-containing protein OS=Drosophila melanogaster OX=7227 GN=jdp;sp|Q9TVP3-3|JDP_DROME Isoform C of J domain-contain	0	0	0	0	0	0	0	0	0	78386000	26831000	48299000	22189000	6870800	17260000	48397000	17780000	46925000	58966000	48928000	90354000	26327000	27844000	73977000	59125000	5334500	24580000	NaN	NaN	NaN	0.34644	0.32933	0.42073	1.972	1.3129	0.29288	NaN	NaN	NaN	0.66893	0.82742	0.7723	5.468	4.1042	1.3174
A0A0B4KEH0;P29310	A0A0B4KEH0;P29310	14-3-3 protein zeta	14-3-3zeta	tr|A0A0B4KEH0|A0A0B4KEH0_DROME 14-3-3zeta, isoform K OS=Drosophila melanogaster OX=7227 GN=14-3-3zeta PE=1 SV=1;sp|P29310|1433Z_DROME 14-3-3 protein zeta OS=Drosophila melanogaster OX=7227 GN=14-3-3zeta PE=1 SV=1	0	0	0	26751000	21427000	50780000	23322000	18536000	45816000	41940000	21462000	66499000	70487000	38169000	93050000	8730200	2918400	18538000	13184000	22805000	89936000	10563000	23534000	78807000	0	0	0	NaN	0.99032	0.9792	0.54875	0.53034	0.26474	1.7349	2.325	NaN	NaN	2.2809	2.3032	1.2617	1.2145	1.1634	7.288	7.4657	NaN
Q9W369	Q9W369		t	sp|Q9W369|TANN_DROME Beta-alanyl-dopamine/carcinine hydrolase OS=Drosophila melanogaster OX=7227 GN=t PE=1 SV=1	0	0	0	0	0	0	0	0	0	87980000	27823000	49783000	86738000	35208000	57118000	4721200	1554400	2517200	27172000	44187000	89912000	11963000	22070000	43709000	31304000	64714000	120410000	NaN	NaN	NaN	0.30692	0.32648	0.38776	2.0134	2.3055	2.3091	NaN	NaN	NaN	0.39529	0.46579	0.56374	3.4266	2.959	3.9959
A0A0B4LGQ1;Q00637	A0A0B4LGQ1;Q00637	Superoxide dismutase;Superoxide dismutase [Mn], mitochondrial	Sod2	tr|A0A0B4LGQ1|A0A0B4LGQ1_DROME Superoxide dismutase OS=Drosophila melanogaster OX=7227 GN=Sod2 PE=3 SV=1;sp|Q00637|SODM_DROME Superoxide dismutase [Mn], mitochondrial OS=Drosophila melanogaster OX=7227 GN=Sod2 PE=2 SV=3	81713000	77733000	30687000	65078000	48795000	23641000	38790000	38470000	18704000	55183000	28428000	98046000	53550000	53565000	109570000	775640	465090	1829800	11649000	23114000	89348000	7697900	15719000	64489000	13564000	28964000	112550000	0.97038	0.84948	0.93376	0.5545	0.55174	0.57879	1.6809	1.9034	2.1506	0.41915	0.36722	0.43705	1.4912	2.0497	1.6947	6.4519	6.1466	7.1984
A1Z7S3;A1Z7S2;A0A0B4LEY0;A1Z7S1;Q8T0G8	A1Z7S3;A1Z7S2;A0A0B4LEY0;A1Z7S1;Q8T0G8		ltd	tr|A1Z7S3|A1Z7S3_DROME Rab32, isoform B OS=Drosophila melanogaster OX=7227 GN=Rab32 PE=1 SV=1;tr|A1Z7S2|A1Z7S2_DROME Ras-related protein Rab OS=Drosophila melanogaster OX=7227 GN=Rab32 PE=1 SV=2;tr|A0A0B4LEY0|A0A0B4LEY0_DROME Ras-related protein Rab OS=Dro	0	0	0	0	0	0	0	0	0	34056000	7116600	78172000	25456000	7059200	71530000	3784400	826290	10266000	13943000	13280000	89172000	12140000	11049000	78089000	5828500	7944500	57900000	NaN	NaN	NaN	0.19238	0.25809	0.21587	1.3679	1.5806	1.3432	NaN	NaN	NaN	2.6197	2.5205	2.6174	7.1703	10.032	8.4705
Q9VD30	Q9VD30		rdhB	tr|Q9VD30|Q9VD30_DROME GH05294p OS=Drosophila melanogaster OX=7227 GN=rdhB PE=1 SV=1	0	0	0	0	0	0	0	0	0	151590000	76202000	51899000	157300000	78802000	58381000	7713200	3104500	3814700	30933000	59571000	88783000	58368000	102230000	164210000	100620000	135340000	189230000	NaN	NaN	NaN	0.50768	0.43165	0.40784	1.7615	1.7676	1.4878	NaN	NaN	NaN	0.33886	0.3703	0.34088	2.2559	2.5439	2.0603
R9Q794;Q9W5R8	R9Q794;Q9W5R8	60S ribosomal protein L5	RpL5	tr|R9Q794|R9Q794_DROME Large ribosomal subunit protein uL18 OS=Drosophila melanogaster OX=7227 GN=RpL5 PE=1 SV=1;sp|Q9W5R8|RL5_DROME Large ribosomal subunit protein uL18 OS=Drosophila melanogaster OX=7227 GN=RpL5 PE=1 SV=2	190370000	209450000	47127000	135580000	214360000	37663000	202340000	215030000	38527000	56913000	53101000	16247000	49013000	45746000	14409000	1645200	1807800	1673700	27606000	76924000	88652000	3266600	16430000	16302000	52739000	56348000	51911000	1.0723	1.2825	1.1025	0.91917	0.67937	1.0464	4.2812	8.1011	4.9686	0.21241	0.15318	0.17844	0.25948	0.20863	0.8128	4.0101	4.3798	4.2031
Q9VMB9	Q9VMB9		COX5B	tr|Q9VMB9|Q9VMB9_DROME Cytochrome c oxidase subunit 5B, isoform A OS=Drosophila melanogaster OX=7227 GN=COX5B PE=1 SV=1	62541000	29343000	22783000	106640000	69702000	40785000	114640000	70233000	41798000	42743000	19850000	75639000	35655000	10382000	70086000	40447000	14940000	74683000	15084000	26389000	88258000	12477000	14180000	75090000	10930000	24348000	103720000	0.57061	0.67158	0.69002	0.40641	0.358	0.3006	1.5177	1.2981	2.3058	0.30255	0.32336	0.35271	1.7343	1.5743	1.6507	5.1079	5.6224	7.5901
Q9VBU9	Q9VBU9	40S ribosomal protein S27	RpS27	tr|Q9VBU9|Q9VBU9_DROME 40S ribosomal protein S27 OS=Drosophila melanogaster OX=7227 GN=RpS27 PE=1 SV=1	278570000	320110000	50324000	352520000	525080000	163630000	167970000	271150000	30500000	97606000	103940000	22829000	62709000	55346000	14476000	6648300	6877200	1731100	20477000	80138000	87969000	10794000	51740000	58380000	16447000	56395000	64084000	1.2445	1.4491	1.5666	1.1687	0.79716	1.0557	3.6407	4.3253	4.4824	0.11787	0.21355	0.11428	0.25559	0.23668	0.22399	3.8308	3.6318	4.1047
Q9VSA3	Q9VSA3	Probable medium-chain specific acyl-CoA dehydrogenase, mitochondrial	CG12262	sp|Q9VSA3|ACADM_DROME Medium-chain specific acyl-CoA dehydrogenase, mitochondrial OS=Drosophila melanogaster OX=7227 GN=Mcad PE=1 SV=1	456310000	350050000	99401000	480120000	404600000	106190000	487380000	357190000	101790000	256780000	244680000	85415000	171690000	199110000	61386000	10277000	10630000	2845400	31182000	100570000	87927000	48164000	183810000	140080000	57654000	219000000	197230000	0.72744	0.82821	0.78452	0.83293	0.89875	0.97784	3.155	3.2849	4.0725	0.21109	0.18586	0.20954	0.29814	0.3257	0.29819	2.861	2.9016	3.2356
P15372;M9NES0;X2J8V5	P15372;M9NES0;X2J8V5	Phosrestin-2	Arr1	sp|P15372|ARRA_DROME Phosrestin-2 OS=Drosophila melanogaster OX=7227 GN=Arr1 PE=1 SV=1;tr|M9NES0|M9NES0_DROME Arrestin 1, isoform B OS=Drosophila melanogaster OX=7227 GN=Arr1 PE=3 SV=1;tr|X2J8V5|X2J8V5_DROME Arrestin 1, isoform C OS=Drosophila melanogaster	0	0	0	0	0	0	0	0	0	186910000	178150000	41378000	259070000	288370000	54895000	21097000	21540000	6112100	33971000	149370000	87796000	27962000	132410000	82759000	38192000	151280000	93852000	NaN	NaN	NaN	0.93161	1.0363	1.1017	4.1388	3.3004	4.6158	NaN	NaN	NaN	0.28609	0.25075	0.28391	2.6296	2.9095	2.8353
X2JGM9;P41042	X2JGM9;P41042	40S ribosomal protein S4	RpS4	tr|X2JGM9|X2JGM9_DROME 40S ribosomal protein S4 OS=Drosophila melanogaster OX=7227 GN=RpS4 PE=3 SV=1;sp|P41042|RS4_DROME Small ribosomal subunit protein eS4 OS=Drosophila melanogaster OX=7227 GN=RpS4 PE=1 SV=2	295670000	314500000	82049000	241050000	284380000	55897000	204760000	235220000	63323000	94852000	84685000	33774000	80145000	90244000	28713000	3034100	3481900	1669900	66400000	87147000	86800000	32181000	76627000	75098000	24365000	80907000	103810000	1.1182	1.2893	1.2314	1.0622	1.0326	1.1129	3.9601	3.8439	4.6805	0.23153	0.20832	0.20908	0.33187	0.31429	0.48498	4.5543	4.1987	4.6049
P42281	P42281	Acyl-CoA-binding protein homolog	Dbi	sp|P42281|ACBP_DROME Acyl-CoA-binding protein homolog OS=Drosophila melanogaster OX=7227 GN=Acbp2 PE=2 SV=1	1131400000	1.5024e+09	352380000	1324800000	1.7589e+09	260710000	1081900000	1344500000	215890000	114550000	170900000	24906000	241970000	352930000	51958000	194380000	283140000	41962000	35779000	183050000	86710000	20815000	96296000	65090000	24038000	120170000	61548000	1.2059	1.3824	1.2006	1.35	1.5111	1.3826	3.721	4.9815	4.9055	0.20675	0.22031	0.21894	0.16589	0.2627	0.22473	2.0281	2.7656	2.3679
Q9Y112	Q9Y112		BcDNA.GH10614	tr|Q9Y112|Q9Y112_DROME BcDNA.GH10614 OS=Drosophila melanogaster OX=7227 GN=Akr2E3 PE=1 SV=1	237970000	260380000	75511000	253000000	376730000	81713000	260760000	317140000	89429000	151130000	123320000	64817000	123060000	119360000	50814000	4322900	3767900	1655000	43818000	105220000	85910000	31645000	80379000	76887000	51388000	158400000	132250000	1.1149	1.2449	1.1441	0.83619	0.93109	0.90532	3.0631	3.7455	4.273	0.23283	0.21676	0.22597	0.27157	0.33646	0.48499	2.456	2.9055	2.9795
Q7K188	Q7K188			tr|Q7K188|Q7K188_DROME GEO05126p1 OS=Drosophila melanogaster OX=7227 GN=Dmel\CG6329 PE=2 SV=1	0	0	0	0	0	0	0	0	0	6768000	3965900	74961000	4216800	3137300	16463000	0	0	0	7930800	4810600	85840000	4528200	2514500	36561000	1703400	2217700	63738000	NaN	NaN	NaN	1.6386	1.9749	NaN	0.56568	0.92346	1.0713	NaN	NaN	NaN	4.4967	4.0423	NaN	6.364	4.6159	10.908
X2JES1;Q9VIS3;A0A0U1RVK6	X2JES1;Q9VIS3;A0A0U1RVK6		fbp	tr|X2JES1|X2JES1_DROME fructose-bisphosphatase OS=Drosophila melanogaster OX=7227 GN=Fbp PE=1 SV=1;tr|Q9VIS3|Q9VIS3_DROME fructose-bisphosphatase OS=Drosophila melanogaster OX=7227 GN=Fbp PE=1 SV=1;tr|A0A0U1RVK6|A0A0U1RVK6_DROME fructose-bisphosphatase OS=	644900000	524960000	161230000	811830000	763620000	237860000	624670000	596630000	182300000	228530000	278390000	64220000	211040000	226180000	126870000	12269000	12516000	5456400	41620000	139750000	85357000	43757000	173990000	111090000	52589000	239910000	144870000	0.83492	1.0182	0.93827	1.3134	1.104	1.0032	3.2617	4.0934	5.0159	0.23376	0.20593	0.20734	0.21019	0.23755	0.19987	1.7468	2.3724	2.3433
M9PG22;P61209	M9PG22;P61209	ADP-ribosylation factor 1	Arf79F	tr|M9PG22|M9PG22_DROME ADP-ribosylation factor OS=Drosophila melanogaster OX=7227 GN=Arf1 PE=3 SV=1;sp|P61209|ARF1_DROME ADP-ribosylation factor 1 OS=Drosophila melanogaster OX=7227 GN=Arf1 PE=1 SV=2	76642000	133230000	23180000	83304000	152820000	21615000	71831000	121670000	22691000	74655000	64438000	46180000	90951000	82036000	49403000	6422300	5094900	4613100	23790000	48422000	85302000	25715000	51495000	80701000	54928000	128150000	202170000	1.6499	1.5681	1.6487	0.81815	0.86857	0.80694	1.5278	1.5883	3.0008	0.19999	0.21131	0.24239	0.51261	0.58871	0.67725	2.6516	2.3357	3.8903
Q8IMI7;Q9VA91	Q8IMI7;Q9VA91	40S ribosomal protein S7	RpS7	tr|Q8IMI7|Q8IMI7_DROME 40S ribosomal protein S7 OS=Drosophila melanogaster OX=7227 GN=RpS7 PE=1 SV=2;sp|Q9VA91|RS7_DROME Small ribosomal subunit protein eS7 OS=Drosophila melanogaster OX=7227 GN=RpS7 PE=1 SV=1	372440000	408950000	82641000	256280000	339010000	49710000	240050000	255950000	49736000	180720000	158800000	59697000	109270000	122140000	35461000	5950000	5855000	2356000	19659000	81854000	85189000	16722000	79244000	85884000	32853000	138240000	147550000	1.1358	1.3834	1.0967	0.8954	1.315	1.0385	3.5004	5.3008	4.3083	0.17804	0.20188	0.19682	0.26105	0.33789	0.37942	3.2566	5.2665	4.2272
Q2QBM1;Q9VG32;Q9VG31	Q2QBM1;Q9VG32;Q9VG31	Malic enzyme	Men	tr|Q2QBM1|Q2QBM1_DROME Malic enzyme OS=Drosophila melanogaster OX=7227 GN=Men PE=1 SV=1;tr|Q9VG32|Q9VG32_DROME Malic enzyme OS=Drosophila melanogaster OX=7227 GN=Men PE=1 SV=1;tr|Q9VG31|Q9VG31_DROME Malic enzyme OS=Drosophila melanogaster OX=7227 GN=Men PE	1.0329e+09	1224400000	194550000	1.5668e+09	2.1224e+09	281220000	1234900000	1.5868e+09	203350000	177300000	228000000	48390000	221420000	287750000	63898000	12664000	17565000	3767300	43345000	119750000	84368000	52935000	161560000	92520000	61073000	282530000	157520000	1.1987	1.4356	1.2537	1.4347	1.3329	1.5153	3.3367	4.571	4.805	0.17512	0.15088	0.16354	0.25778	0.25573	0.27761	2.1857	2.3261	2.6404
P29327;Q95TP9;P29327-2	P29327;Q95TP9;P29327-2	40S ribosomal protein S6	RpS6	sp|P29327|RS6_DROME Small ribosomal subunit protein eS6 OS=Drosophila melanogaster OX=7227 GN=RpS6 PE=1 SV=1;tr|Q95TP9|Q95TP9_DROME 40S ribosomal protein S6 OS=Drosophila melanogaster OX=7227 GN=RpS6 PE=1 SV=1;sp|P29327-2|RS6_DROME Isoform B of Small ribos	236580000	270300000	55359000	208470000	263180000	44961000	243200000	283860000	47493000	131980000	148440000	33414000	122160000	157310000	48619000	6933700	6542700	2596700	24710000	84189000	83795000	20011000	95926000	77793000	29293000	121180000	118360000	1.1954	1.246	1.1996	1.0289	1.1792	1.0782	3.4603	4.6994	3.9964	0.21093	0.1835	0.18119	0.34121	0.30802	0.3786	2.8952	3.948	3.6017
Q9VD58	Q9VD58			tr|Q9VD58|Q9VD58_DROME GH26270p OS=Drosophila melanogaster OX=7227 GN=Idh3b PE=1 SV=1	19694000	12124000	7412500	14396000	11690000	6212400	8038700	6974300	4065600	60732000	19714000	95613000	43822000	14417000	91236000	1376700	658640	4330900	10855000	11016000	83720000	15119000	17541000	84372000	21161000	32399000	147720000	0.54783	0.87738	0.87518	0.38465	0.28097	0.36415	1.0319	1.357	1.5337	0.34979	0.52292	0.49642	1.6215	2.0112	2.7298	6.0763	6.3074	9.5338
E2QD65;P39018	E2QD65;P39018	40S ribosomal protein S19a	RpS19a	tr|E2QD65|E2QD65_DROME Ribosomal protein S19a, isoform C OS=Drosophila melanogaster OX=7227 GN=RpS19a PE=1 SV=1;sp|P39018|RS19A_DROME Small ribosomal subunit protein eS19A OS=Drosophila melanogaster OX=7227 GN=RpS19a PE=1 SV=3	282580000	358170000	115830000	380550000	527110000	144180000	226870000	266800000	104530000	117020000	126730000	67297000	95415000	102500000	40357000	4045600	3461900	1334300	19725000	76768000	82988000	26340000	138990000	129440000	25561000	130240000	143670000	1.248	1.3149	1.2862	0.91318	1.1426	0.95601	3.7479	3.3816	5.4885	0.26386	0.24782	0.30953	0.48544	0.36049	0.33874	3.2946	3.6829	5.4256
Q9VF15;Q8T0T2	Q9VF15		glob1	tr|Q9VF15|Q9VF15_DROME GEO09476p1 OS=Drosophila melanogaster OX=7227 GN=glob1 PE=1 SV=1	899730000	785530000	243760000	1.0173e+09	1.0551e+09	284960000	816320000	812590000	209690000	696400000	635660000	195530000	357810000	364720000	78433000	52468000	58348000	113840000	40733000	154790000	82982000	94822000	284230000	143150000	50841000	208620000	136230000	0.82788	1.115	1.0066	0.97074	1.019	1.0974	3.6886	3.8831	4.3517	0.23698	0.22242	0.24796	0.19787	0.22941	0.19615	2.132	2.2431	2.571
P23779	P23779	Cystatin-like protein	Cys	sp|P23779|CYTL_DROME Cystatin-like protein OS=Drosophila melanogaster OX=7227 GN=Cys PE=2 SV=2	74267000	85726000	15199000	41735000	53220000	5999500	35097000	31147000	7123800	87574000	95888000	23117000	64783000	109610000	20671000	80107000	111330000	24142000	40323000	126610000	82875000	17151000	80381000	48786000	37699000	145410000	96016000	1.2101	1.1105	0.92215	1.2324	1.5349	1.4134	3.9535	3.8073	4.1555	0.15689	0.23676	0.22922	0.26768	0.31166	0.33085	2.2633	2.3845	2.6805
A4V4Q6;P36188-7;P36188;E4NKJ3;P36188-6;P36188-10	A4V4Q6;P36188-7;P36188;E4NKJ3;P36188-6;P36188-10	Troponin I	wupA	tr|A4V4Q6|A4V4Q6_DROME GH08696p OS=Drosophila melanogaster OX=7227 GN=wupA PE=1 SV=1;sp|P36188-7|TNNI_DROME Isoform 6 of Troponin I OS=Drosophila melanogaster OX=7227 GN=wupA;sp|P36188|TNNI_DROME Troponin I OS=Drosophila melanogaster OX=7227 GN=wupA PE=2 S	0	0	0	0	0	0	0	0	0	13845000	1431700	61108000	21169000	1833300	72679000	14843000	1514400	60714000	9730500	3677400	82444000	7509800	2531700	61817000	8110900	4441300	65760000	NaN	NaN	NaN	0.11499	0.092667	0.10761	0.53914	0.39381	0.54398	NaN	NaN	NaN	4.3946	3.0118	4.0758	7.2455	8.0066	7.3825
P16378-2;P16378;D5AEN0;M9PDM5;P25157	P16378-2;P16378	G protein alpha o subunit	Galphao	sp|P16378-2|GNAO_DROME Isoform B of G protein alpha o subunit OS=Drosophila melanogaster OX=7227 GN=Galphao;sp|P16378|GNAO_DROME G protein alpha o subunit OS=Drosophila melanogaster OX=7227 GN=Galphao PE=1 SV=1	0	0	0	385880	406710	993460	0	0	0	41136000	14957000	127690000	43085000	15064000	132280000	2215200	669730	7107500	5020000	5614800	81690000	5055000	6019300	78781000	5730500	12542000	130130000	NaN	1.8343	NaN	0.3839	0.24321	0.26063	1.2453	0.9192	2.4051	NaN	3.0671	NaN	3.1254	2.5489	2.8986	13.03	14.251	14.97
B7YZP9;A0A0B4LGF8;P53777	B7YZP9;A0A0B4LGF8;P53777	Muscle LIM protein 1	Mlp60A	tr|B7YZP9|B7YZP9_DROME Muscle LIM protein 60A OS=Drosophila melanogaster OX=7227 GN=Mlp60A PE=1 SV=1;tr|A0A0B4LGF8|A0A0B4LGF8_DROME Muscle LIM protein at 60A, isoform F OS=Drosophila melanogaster OX=7227 GN=Mlp60A PE=1 SV=1;sp|P53777|MLP1_DROME Muscle LIM	181090000	27638000	193590000	173680000	23140000	189670000	150490000	21390000	161320000	73786000	12285000	106300000	25446000	3817400	36629000	16861000	2440400	26794000	15619000	15669000	80748000	7540800	10427000	43305000	8792000	8010500	47943000	0.17678	0.17293	0.17033	0.15469	0.18506	0.21059	0.93519	1.1331	0.98377	1.1818	1.1549	1.0156	1.4798	1.4108	1.4613	4.492	5.2281	5.5402
Q9VVG5	Q9VVG5			tr|Q9VVG5|Q9VVG5_DROME RH19679p OS=Drosophila melanogaster OX=7227 GN=COX7B PE=1 SV=2	39028000	20130000	10761000	52280000	31994000	14257000	73868000	21068000	28066000	61343000	25553000	109690000	36944000	20740000	124700000	0	0	0	17455000	18352000	80720000	21418000	33088000	146500000	13782000	18234000	135170000	0.68138	0.64719	0.53271	0.43512	0.39185	NaN	1.0745	1.7135	1.7424	0.37718	0.25425	0.41877	1.8342	2.1087	NaN	5.2883	5.6036	8.1022
B7YZH7;G2J5Z0	B7YZH7;G2J5Z0		CG8446-RD;CG8446-RE	tr|B7YZH7|B7YZH7_DROME GM12693p OS=Drosophila melanogaster OX=7227 GN=Dmel\CG44242 PE=1 SV=1;tr|G2J5Z0|G2J5Z0_DROME FI15274p1 OS=Drosophila melanogaster OX=7227 GN=CG8446-RE PE=1 SV=1	0	0	0	35837000	50993000	12018000	32762000	33455000	7434900	42075000	20195000	40429000	47601000	26691000	45480000	54766000	28985000	58100000	12584000	34754000	80528000	12858000	24857000	67885000	0	0	0	NaN	1.1815	0.99556	0.49686	0.5252	0.52249	2.0463	1.6173	NaN	NaN	0.25065	0.28329	1.1341	0.91898	1.0934	3.5948	4.1195	NaN
Q9VQR2	Q9VQR2		ND-PDSW	tr|Q9VQR2|Q9VQR2_DROME NADH dehydrogenase [ubiquinone] 1 beta subcomplex subunit 10 OS=Drosophila melanogaster OX=7227 GN=ND-PDSW PE=1 SV=1	23333000	20004000	6129500	25176000	24415000	8352100	16412000	11512000	5794400	51574000	22344000	81593000	20514000	11299000	47624000	0	0	0	14290000	25520000	79887000	12259000	15746000	60526000	14215000	28292000	72456000	0.98445	0.9907	0.92924	0.55795	0.57102	NaN	1.6011	1.7817	2.0943	0.33794	0.36691	0.37148	1.9099	2.0664	NaN	5.8161	6.8085	6.535
Q8IRQ5;Q9W3X6;Q9W3X5;Q9VTI5	Q8IRQ5;Q9W3X6		l(1)G0255	tr|Q8IRQ5|Q8IRQ5_DROME fumarate hydratase OS=Drosophila melanogaster OX=7227 GN=Fum1 PE=1 SV=1;tr|Q9W3X6|Q9W3X6_DROME fumarate hydratase OS=Drosophila melanogaster OX=7227 GN=Fum1 PE=1 SV=3	54632000	58593000	24312000	84265000	98608000	38283000	60921000	70321000	28443000	77683000	33803000	117120000	44264000	21922000	107800000	1114900	425050	4100000	18726000	17836000	79710000	13809000	20454000	91696000	41219000	34402000	159320000	1.1694	1.3208	1.2752	0.67193	0.54275	0.4434	1.5032	1.5822	2.04	0.42206	0.44307	0.49994	2.2993	2.1333	1.924	8.2408	6.6187	7.0823
Q9W2E8	Q9W2E8		ND-B12	tr|Q9W2E8|Q9W2E8_DROME NADH dehydrogenase [ubiquinone] 1 beta subcomplex subunit 3 OS=Drosophila melanogaster OX=7227 GN=ND-B12 PE=1 SV=1	35839000	29269000	12265000	31518000	16708000	21691000	24263000	22582000	13394000	18929000	9340500	42625000	43338000	23405000	100710000	1255400	371930	4335200	12777000	20451000	79455000	8490200	9519200	54039000	4965000	11755000	53359000	0.82978	0.68341	0.70492	0.45801	0.5684	0.48499	1.3867	1.0916	2.6742	0.43942	0.44133	0.51063	2.09	2.4042	2.7713	6.1288	6.2709	11.078
Q9W2M4	Q9W2M4			tr|Q9W2M4|Q9W2M4_DROME Farnesoic acid O-methyl transferase domain-containing protein OS=Drosophila melanogaster OX=7227 GN=Dmel\CG10527 PE=1 SV=1	180740000	81615000	59322000	93117000	47502000	34144000	96259000	60568000	37562000	92851000	49618000	52620000	41164000	16351000	24114000	10260000	4776100	6270300	21313000	36851000	78837000	12504000	27601000	51921000	22651000	51432000	92400000	0.56607	0.55612	0.59137	0.56205	0.47579	0.5194	1.876	3.2021	2.6403	0.35075	0.39583	0.34616	0.54061	0.65312	0.67089	3.5372	5.6948	3.7127
Q9VEJ0	Q9VEJ0		Prx3	sp|Q9VEJ0|PRDX3_DROME Thioredoxin-dependent peroxide reductase, mitochondrial OS=Drosophila melanogaster OX=7227 GN=Prx3 PE=1 SV=2	234780000	173240000	68494000	261640000	170330000	67091000	197700000	139860000	58742000	124350000	107390000	114290000	134560000	73295000	83462000	2610700	2318500	4464500	126530000	40940000	78603000	122310000	65434000	106540000	194200000	54894000	107360000	0.82484	0.8193	0.87202	0.7518	0.86744	0.79753	1.7947	2.3711	2.7137	0.23463	0.24142	0.37305	1.273	1.1396	1.6009	4.1171	4.6862	4.7909
Q9VBN5	Q9VBN5	60S ribosomal protein L27	RpL27	tr|Q9VBN5|Q9VBN5_DROME 60S ribosomal protein L27 OS=Drosophila melanogaster OX=7227 GN=RpL27 PE=1 SV=1	253760000	255370000	58434000	264840000	362910000	51624000	221980000	280870000	50991000	102310000	94607000	33734000	71338000	87547000	23633000	14941000	17446000	6100000	19720000	82309000	78111000	18245000	85083000	73187000	32049000	107470000	127400000	1.1147	1.408	1.2596	0.9246	1.2785	1.1396	3.5701	4.2522	3.7722	0.23295	0.19494	0.19844	0.29138	0.25604	0.42247	3.6478	4.0873	3.8858
Q9VNW6	Q9VNW6			tr|Q9VNW6|Q9VNW6_DROME Delta-1-pyrroline-5-carboxylate synthase OS=Drosophila melanogaster OX=7227 GN=P5CS PE=1 SV=1	336260000	192150000	93076000	402240000	257120000	105180000	382340000	193130000	97565000	223390000	142630000	38295000	207800000	144660000	35501000	17484000	14081000	4195700	61974000	142990000	77857000	26178000	103350000	57833000	105870000	171370000	101610000	0.58405	0.63463	0.55409	0.644	0.71797	0.80781	3.5615	3.9407	4.4411	0.17275	0.19224	0.19916	0.18552	0.15008	0.16986	1.8795	2.3865	2.3825
M9PG47;P13008	M9PG47;P13008	40S ribosomal protein S26	RpS26	tr|M9PG47|M9PG47_DROME 40S ribosomal protein S26 OS=Drosophila melanogaster OX=7227 GN=RpS26 PE=3 SV=1;sp|P13008|RS26_DROME Small ribosomal subunit protein eS26 OS=Drosophila melanogaster OX=7227 GN=RpS26 PE=1 SV=1	884410000	971090000	170080000	652960000	787870000	138060000	660820000	859160000	565990000	318000000	329450000	167700000	514900000	559590000	276560000	16445000	13597000	5397400	19305000	67208000	77295000	38151000	175080000	181970000	129910000	553840000	540440000	1.1927	1.2718	1.2853	1.0916	1.1384	0.91185	3.0495	3.979	4.2909	0.20859	0.18742	0.22747	0.27662	0.56249	0.40045	2.9483	3.5291	3.2961
M9PCC1;O18640;M9PB67;Q9VYQ9	M9PCC1;O18640	Guanine nucleotide-binding protein subunit beta-like protein	Rack1	tr|M9PCC1|M9PCC1_DROME Small ribosomal subunit protein RACK1 OS=Drosophila melanogaster OX=7227 GN=Rack1 PE=3 SV=1;sp|O18640|GBLP_DROME Small ribosomal subunit protein RACK1 OS=Drosophila melanogaster OX=7227 GN=Rack1 PE=1 SV=2	177930000	201350000	57847000	201210000	270560000	38097000	167110000	194620000	46579000	57469000	56699000	17512000	54204000	57317000	32814000	2696500	3151900	1194000	14482000	51724000	76851000	9611900	41791000	49299000	18821000	68769000	105230000	1.0438	1.1953	1.2518	1.0561	1.1367	1.0375	2.6299	3.3452	3.3858	0.19696	0.17704	0.18937	0.27293	0.30289	0.57657	2.6589	2.8263	3.1803
P36188-5;P36188-4	P36188-5;P36188-4	Troponin I	wupA	sp|P36188-5|TNNI_DROME Isoform 4 of Troponin I OS=Drosophila melanogaster OX=7227 GN=wupA;sp|P36188-4|TNNI_DROME Isoform 3 of Troponin I OS=Drosophila melanogaster OX=7227 GN=wupA	0	0	0	0	0	0	0	0	0	12964000	4392500	64434000	12122000	1533800	53472000	30909000	5185700	119660000	5980700	3685900	75900000	5516300	3706400	68546000	3503000	4199600	59669000	NaN	NaN	NaN	0.46702	0.090733	0.20677	0.62252	0.54982	1.1441	NaN	NaN	NaN	5.0067	3.8918	3.2126	11.241	11.123	15.093
X2J4C1;X2J979;P21521-4;P21521-2;P21521;P21521-5;P21521-6;B7Z0K2;A8JR10;Q6XK20;B7Z0K1;Q59DW9	X2J4C1;X2J979;P21521-4;P21521-2;P21521;P21521-5	Synaptotagmin 1	Syt1	tr|X2J4C1|X2J4C1_DROME Synaptotagmin 1, isoform I OS=Drosophila melanogaster OX=7227 GN=Syt1 PE=4 SV=1;tr|X2J979|X2J979_DROME Synaptotagmin 1, isoform H OS=Drosophila melanogaster OX=7227 GN=Syt1 PE=4 SV=1;sp|P21521-4|SY65_DROME Isoform E of Synaptotagmin	4732000	5475300	2845000	0	0	0	0	0	0	54243000	14660000	127700000	41458000	18325000	99953000	2814100	405710	6351000	10270000	14704000	75521000	4485000	4726100	37941000	15192000	18530000	147740000	0.78415	NaN	NaN	0.25322	0.26743	0.13914	0.80989	0.99761	0.9328	0.59933	NaN	NaN	2.1714	1.9351	2.2706	7.1022	6.3402	6.7867
Q9VHX4	Q9VHX4			tr|Q9VHX4|Q9VHX4_DROME LD24679p OS=Drosophila melanogaster OX=7227 GN=Dmel\CG2767 PE=1 SV=1	43301000	38735000	16233000	50058000	51882000	18002000	39988000	26263000	10094000	118400000	86838000	58332000	192270000	64653000	52956000	4104100	2689600	3035200	133360000	48063000	75317000	156170000	56577000	88774000	16352000	117230000	52857000	0.8261	0.97659	0.834	0.55593	0.66985	0.53542	2.2499	1.4712	2.932	0.36764	0.28722	0.32096	0.50701	0.48767	0.87054	3.8199	3.2639	3.9751
Q9XYZ9	Q9XYZ9		GstE12	tr|Q9XYZ9|Q9XYZ9_DROME Glutathione S transferase E12, isoform A OS=Drosophila melanogaster OX=7227 GN=GstE12 PE=1 SV=1	460970000	328520000	185380000	725060000	687680000	303810000	455060000	347010000	206240000	276990000	236180000	113320000	216090000	194670000	91336000	7874500	5181800	2852000	25403000	77885000	75083000	27519000	107790000	93456000	51336000	150490000	124400000	0.69315	0.86267	0.82436	0.69718	0.94199	0.89267	3.8906	3.9628	3.8103	0.19628	0.17652	0.23219	0.2338	0.30833	0.45543	2.3915	2.9684	2.2452
X2JEB6;Q9W303	X2JEB6;Q9W303	Chitinase-like protein Idgf4	Idgf4	tr|X2JEB6|X2JEB6_DROME Imaginal disc growth factor 4, isoform C OS=Drosophila melanogaster OX=7227 GN=Idgf4 PE=1 SV=1;sp|Q9W303|IDGF4_DROME Chitinase-like protein Idgf4 OS=Drosophila melanogaster OX=7227 GN=Idgf4 PE=2 SV=1	93285000	156920000	19688000	123140000	224460000	21500000	77861000	132410000	14523000	129980000	261130000	35936000	215820000	352370000	58644000	6755800	11256000	1784700	40874000	212110000	74422000	50378000	217170000	105820000	53229000	318550000	120160000	1.8896	2.0935	2.02	1.5034	1.9181	2.2074	7.5157	7.3271	8.0166	0.23897	0.28739	0.23177	0.21552	0.23187	0.44889	2.4991	2.3762	2.6426
Q9VXN2-2;Q9VXN2	Q9VXN2-2;Q9VXN2		sun	sp|Q9VXN2-2|SUN_DROME Isoform B of Protein stunted OS=Drosophila melanogaster OX=7227 GN=sun;sp|Q9VXN2|SUN_DROME Protein stunted OS=Drosophila melanogaster OX=7227 GN=sun PE=1 SV=1	221240000	229040000	140060000	202280000	308900000	173970000	168580000	235640000	107180000	130040000	144460000	688010000	0	0	0	0	0	0	12350000	21579000	74284000	13779000	22821000	94786000	23088000	27350000	141190000	0.84594	1.1149	1.4993	0.4489	NaN	NaN	1.4419	1.3167	1.2966	0.42974	0.77671	0.63071	1.6352	NaN	NaN	5.6194	6.2964	5.6667
Q9V4E7;Q8IMC1	Q9V4E7;Q8IMC1	Transporter		tr|Q9V4E7|Q9V4E7_DROME Transporter OS=Drosophila melanogaster OX=7227 GN=Gat PE=1 SV=4;tr|Q8IMC1|Q8IMC1_DROME Transporter OS=Drosophila melanogaster OX=7227 GN=Gat PE=1 SV=2	0	0	0	0	0	0	0	0	0	20049000	4253700	79254000	15962000	3110500	73670000	376640	146170	3063400	5324500	6200600	73955000	9663400	3697600	63418000	5886700	9232900	96103000	NaN	NaN	NaN	0.213	0.22204	0.7011	0.85681	0.59081	1.8924	NaN	NaN	NaN	3.8106	4.5622	4.9228	11.231	9.4559	12.13
Q53YH3;P29413	Q53YH3;P29413	Calreticulin	Crc	tr|Q53YH3|Q53YH3_DROME Calreticulin OS=Drosophila melanogaster OX=7227 GN=Calr PE=1 SV=1;sp|P29413|CALR_DROME Calreticulin OS=Drosophila melanogaster OX=7227 GN=Calr PE=1 SV=2	49748000	78054000	10640000	56574000	99223000	10497000	47799000	77756000	12527000	80189000	72840000	37103000	50681000	56919000	26024000	8123100	8763500	4226800	39729000	58617000	73760000	37556000	37618000	45485000	34721000	75915000	77352000	1.7455	1.9507	1.5697	0.9759	1.0979	1.0512	4.2163	3.5209	3.5555	0.20453	0.15432	0.23013	0.39791	0.49536	0.52299	3.72	2.8532	3.7059
Q3YMU0;REV__Q9VEF9;REV__A0A0B4K728;REV__A0A0B4LIC0;REV__Q9VEF7;REV__A0A0B4KHP1;REV__A0A0B4K6L3	Q3YMU0	Protein disulfide-isomerase	ERp60	tr|Q3YMU0|Q3YMU0_DROME Protein disulfide-isomerase (Fragment) OS=Drosophila melanogaster OX=7227 GN=ERp60 PE=1 SV=1	122620000	189380000	22554000	121910000	237230000	25040000	107930000	179230000	21118000	141070000	161040000	88702000	110050000	119300000	111510000	4858400	5151800	1867000	23620000	82031000	72961000	28699000	92582000	118500000	47789000	174140000	167280000	1.5414	1.8321	1.6742	1.1056	1.1116	0.97564	3.8727	3.8118	4.5503	0.15967	0.20934	0.17181	0.38009	0.42788	0.46988	3.6251	3.5572	4.8501
A0A0B4LFD9;Q8T3U2	A0A0B4LFD9;Q8T3U2	40S ribosomal protein S23	RpS23	tr|A0A0B4LFD9|A0A0B4LFD9_DROME Small ribosomal subunit protein uS12 OS=Drosophila melanogaster OX=7227 GN=RpS23 PE=2 SV=1;sp|Q8T3U2|RS23_DROME Small ribosomal subunit protein uS12 OS=Drosophila melanogaster OX=7227 GN=RpS23 PE=1 SV=1	279450000	316140000	66544000	302830000	395020000	69263000	261880000	309310000	63275000	146640000	154800000	58444000	122020000	140520000	50907000	9828100	10362000	3642800	15954000	49652000	72569000	26873000	115770000	115630000	52155000	179000000	206970000	1.0794	1.2027	1.1817	1.0696	1.093	1.1455	3.5306	4.1763	3.5264	0.20416	0.17517	0.18986	0.34856	0.45815	0.3546	3.9559	3.8469	3.9785
Q7K221;A1ZAA5	Q7K221;A1ZAA5		Got1	tr|Q7K221|Q7K221_DROME aspartate transaminase OS=Drosophila melanogaster OX=7227 GN=Got1 PE=1 SV=1;tr|A1ZAA5|A1ZAA5_DROME aspartate transaminase OS=Drosophila melanogaster OX=7227 GN=Got1 PE=1 SV=1	152560000	268300000	46940000	114980000	237220000	41503000	117350000	185050000	34190000	107320000	144460000	39956000	56900000	96707000	25675000	615950	583940	231340	9074800	46761000	71905000	11074000	60724000	40719000	28156000	152940000	93685000	1.7796	1.828	1.7706	1.3161	1.2234	1.1103	4.9091	5.3596	7.3625	0.29095	0.24098	0.28822	0.44214	0.33263	0.40103	3.3423	3.869	3.6597
Q9W499	Q9W499		RpL35	tr|Q9W499|Q9W499_DROME 60S ribosomal protein L35 OS=Drosophila melanogaster OX=7227 GN=RpL35 PE=1 SV=2	245210000	368220000	47812000	199490000	255920000	80208000	141030000	188030000	50047000	83973000	102560000	27866000	45591000	56207000	16362000	15535000	18887000	5628000	25691000	63856000	71135000	20847000	65448000	82274000	30302000	80813000	97275000	1.4064	1.3072	1.4042	1.111	1.108	1.1109	2.0879	2.6621	2.5768	0.20545	0.45054	0.47539	0.29025	0.30242	0.36389	2.5583	3.0511	2.9447
Q9VY05	Q9VY05			tr|Q9VY05|Q9VY05_DROME GH11762p OS=Drosophila melanogaster OX=7227 GN=Dmel\CG9512 PE=1 SV=1	23595000	26115000	79753000	28286000	39501000	58169000	24881000	37951000	3924300	55152000	50361000	15088000	56170000	47136000	10149000	0	0	0	25573000	103440000	70827000	12933000	43362000	23134000	22364000	91028000	46555000	1.156	1.1592	1.3672	1.0538	1.022	NaN	5.1424	3.4208	4.0587	1.4847	0.54014	0.16159	0.13702	0.16391	NaN	1.793	1.7613	1.9982
A0A0B4LFJ1;Q23997	A0A0B4LFJ1;Q23997	Chitinase-like protein CG5210	CG5210	tr|A0A0B4LFJ1|A0A0B4LFJ1_DROME Imaginal disc growth factor 6, isoform B OS=Drosophila melanogaster OX=7227 GN=Idgf6 PE=3 SV=1;sp|Q23997|C5210_DROME Imaginal disk growth factor 6 OS=Drosophila melanogaster OX=7227 GN=Idgf6 PE=1 SV=2	78131000	125370000	12085000	95178000	178410000	20539000	69665000	117380000	11313000	155510000	217150000	29797000	191380000	321070000	41298000	6451200	11410000	1240500	39553000	167230000	69467000	36799000	164480000	63693000	82553000	342250000	127740000	1.7397	1.7678	1.737	1.6157	1.8999	1.8202	6.1857	6.5993	6.8684	0.2516	0.22118	0.18954	0.16811	0.14856	0.22888	2.2527	2.0628	2.098
P29746	P29746	Protein bangles and beads	bnb	sp|P29746|BNB_DROME Protein bangles and beads OS=Drosophila melanogaster OX=7227 GN=bnb PE=1 SV=1	0	0	0	0	0	0	0	0	0	113790000	66468000	57955000	109070000	69140000	53787000	190500000	128690000	102000000	24770000	67164000	68725000	36626000	75187000	98947000	22861000	51247000	58812000	NaN	NaN	NaN	0.7315	0.68446	0.67047	3.5345	3.5694	4.6802	NaN	NaN	NaN	0.45663	0.50028	0.46094	2.9801	2.7303	4.2589
P17336;Q9VLI6	P17336	Catalase	Cat	sp|P17336|CATA_DROME Catalase OS=Drosophila melanogaster OX=7227 GN=Cat PE=1 SV=2	531420000	683320000	104820000	696370000	926640000	133970000	487030000	653670000	103740000	94614000	94027000	51267000	102460000	119390000	45176000	6295400	6276700	1558100	21166000	82631000	68427000	9304600	39162000	38729000	9880800	52592000	39657000	1.025	0.99409	1.0007	0.82536	0.98671	0.82502	4.0677	4.1016	4.1046	0.12883	0.14003	0.134	0.22479	0.19912	0.21352	2.303	2.577	2.9799
O97102	O97102	Small ubiquitin-related modifier	smt3	tr|O97102|O97102_DROME Small ubiquitin-related modifier OS=Drosophila melanogaster OX=7227 GN=Sumo PE=1 SV=1	0	0	0	31997000	33725000	6775600	0	0	0	33715000	21386000	27680000	0	0	0	24371000	17509000	33319000	8761700	19264000	68016000	4991000	14861000	48792000	8548000	26693000	79305000	NaN	1.1556	NaN	0.73448	NaN	0.73411	2.7859	2.7764	3.1863	NaN	0.25967	NaN	0.75093	NaN	1.0739	5.6278	7.9876	6.9615
Q9VVU1	Q9VVU1		CG3902-RA	tr|Q9VVU1|Q9VVU1_DROME Short/branched chain specific acyl-CoA dehydrogenase, mitochondrial OS=Drosophila melanogaster OX=7227 GN=GH07925p PE=1 SV=1	124950000	301040000	32358000	135810000	302490000	37880000	99383000	225440000	26416000	186550000	236460000	84765000	141350000	209730000	31643000	4969300	7056000	996110	25237000	146920000	67836000	33654000	113380000	55973000	47155000	252650000	140130000	2.3323	2.4635	2.1187	1.3659	1.4106	1.3696	5.2039	5.7572	6.9884	0.2552	0.24449	0.24996	0.24168	0.22647	0.3502	2.6624	3.1821	2.6683
Q9VBI2	Q9VBI2	UMP-CMP kinase	Dak1	tr|Q9VBI2|Q9VBI2_DROME UMP-CMP kinase OS=Drosophila melanogaster OX=7227 GN=Cmpk PE=1 SV=1	14731000	14003000	4811900	30589000	18487000	5827800	22098000	15760000	7273400	51534000	20793000	47727000	30613000	13952000	34541000	3364000	1089200	3487000	17184000	26460000	67266000	9680400	12648000	36735000	22027000	27257000	72884000	0.83725	0.55491	0.69571	0.40909	0.38472	0.39658	1.6399	1.6823	1.4993	0.2536	0.25287	0.23399	0.91041	0.97998	0.8842	4.2515	5.8452	5.8689
P80455	P80455	40S ribosomal protein S12	RpS12	sp|P80455|RS12_DROME Small ribosomal subunit protein eS12 OS=Drosophila melanogaster OX=7227 GN=RpS12 PE=1 SV=2	172200000	185010000	52057000	253810000	273430000	230900000	175060000	212570000	41030000	95203000	89497000	41012000	70346000	73936000	20287000	34789000	30869000	12206000	20852000	72015000	65899000	10447000	65728000	71437000	12648000	74221000	86378000	1.3108	1.1159	1.0901	0.95014	0.93209	0.91759	3.7102	5.4377	5.6305	0.57834	0.22511	0.22136	0.39839	0.4448	0.32214	3.9425	5.1758	5.8652
E1JJF3;Q9V427	E1JJF3;Q9V427	Innexin;Innexin inx2	Inx2	tr|E1JJF3|E1JJF3_DROME Innexin OS=Drosophila melanogaster OX=7227 GN=Inx2 PE=1 SV=1;sp|Q9V427|INX2_DROME Innexin inx2 OS=Drosophila melanogaster OX=7227 GN=Inx2 PE=1 SV=1	13181000	6212200	3655800	15211000	7958800	4966200	25422000	17370000	9260100	38563000	14023000	69370000	52569000	18991000	74535000	3625300	62638000	20046000	12763000	21218000	65885000	11711000	16733000	53545000	30281000	26385000	79628000	0.52954	0.61238	0.61081	0.33842	0.25697	0.45491	1.6437	1.9037	1.6955	0.27568	0.29741	0.38064	1.5227	1.4336	1.9194	5.522	6.3317	4.9373
A8JRB8;A8JRC1;Q8MT18	A8JRB8;A8JRC1;Q8MT18		CG5028-RC	tr|A8JRB8|A8JRB8_DROME MIP04243p OS=Drosophila melanogaster OX=7227 GN=Idh3g PE=1 SV=1;tr|A8JRC1|A8JRC1_DROME Uncharacterized protein, isoform D OS=Drosophila melanogaster OX=7227 GN=Idh3g PE=1 SV=1;tr|Q8MT18|Q8MT18_DROME RH49423p OS=Drosophila melanogaste	11885000	14081000	5876100	15272000	21948000	8086800	13131000	13824000	4908300	43824000	19602000	82315000	62868000	24631000	86467000	3190900	1106300	8298600	10194000	14679000	65731000	10644000	16087000	70445000	57306000	39740000	165130000	1.4415	1.2317	1.1151	0.39236	0.57239	0.35424	1.6055	1.8145	1.7087	0.50121	0.5134	0.43908	1.8249	1.976	2.0078	5.9083	6.2497	5.3219
O16797;O16797-5;O16797-2	O16797	60S ribosomal protein L3	RpL3	sp|O16797|RL3_DROME Large ribosomal subunit protein uL3 OS=Drosophila melanogaster OX=7227 GN=RpL3 PE=1 SV=3	154610000	164170000	38246000	118090000	145140000	24887000	135590000	173360000	29299000	67847000	63406000	28928000	64896000	61502000	23795000	3200400	3000800	1621900	23808000	62337000	65731000	16821000	63434000	66500000	14987000	59305000	72834000	0.98129	1.1039	1.1488	0.93663	0.93202	0.88434	3.2807	3.869	3.8688	0.21988	0.20557	0.20761	0.35268	0.36087	0.4902	3.5905	3.2533	4.5348
O97418	O97418		ND-B14.5A	tr|O97418|O97418_DROME NADH dehydrogenase [ubiquinone] 1 alpha subcomplex subunit 7 OS=Drosophila melanogaster OX=7227 GN=ND-B14.5A PE=1 SV=1	39321000	45557000	15737000	9876400	14031000	1964400	56115000	67899000	9342100	24091000	13377000	23263000	15250000	9987700	23930000	0	0	0	14175000	21258000	65527000	4087500	8086700	20848000	3858600	11258000	26527000	1.1274	1.0951	1.3381	0.59356	0.65093	NaN	1.4702	1.9949	2.241	0.41801	NaN	0.11096	0.73858	1.1233	NaN	3.5605	3.7259	4.6
D1Z3A1;Q9VZS5;REV__Q9VGU6	D1Z3A1;Q9VZS5	60S ribosomal protein L28	RpL28	tr|D1Z3A1|D1Z3A1_DROME Large ribosomal subunit protein eL28 OS=Drosophila melanogaster OX=7227 GN=RpL28 PE=1 SV=1;sp|Q9VZS5|RL28_DROME Large ribosomal subunit protein eL28 OS=Drosophila melanogaster OX=7227 GN=RpL28 PE=1 SV=1	137140000	164310000	32440000	156140000	221480000	32543000	171710000	194840000	34421000	101840000	104940000	38198000	68524000	73040000	18671000	0	0	0	17934000	62569000	64554000	16022000	68904000	67154000	11426000	60540000	74497000	1.0081	1.2855	1.1027	1.0441	1.1222	NaN	3.3356	4.6202	5.6459	0.14453	0.16539	0.16874	0.3169	0.24625	NaN	3.0934	3.7306	5.5646
A0A0B4LGZ5;P46222	A0A0B4LGZ5;P46222	60S ribosomal protein L11	RpL11	tr|A0A0B4LGZ5|A0A0B4LGZ5_DROME Ribosomal protein L11, isoform B OS=Drosophila melanogaster OX=7227 GN=RpL11 PE=1 SV=1;sp|P46222|RL11_DROME Large ribosomal subunit protein uL5 OS=Drosophila melanogaster OX=7227 GN=RpL11 PE=1 SV=2	168400000	190780000	38070000	178970000	272570000	44322000	135920000	195600000	34810000	69806000	67990000	38389000	53456000	62579000	33660000	2280400	3430600	1192000	21658000	52189000	64441000	13369000	45235000	58771000	18555000	81647000	76815000	1.3406	1.441	1.3187	1.0551	0.98145	1.4747	2.3684	3.6273	3.9661	0.25453	0.24399	0.22997	0.33739	0.47893	0.60339	3.2006	3.725	3.6288
M9PD26;P19967	M9PD26;P19967	Cytochrome b5-related protein	Cyt-b5-r	tr|M9PD26|M9PD26_DROME Cytochrome b5-related, isoform B OS=Drosophila melanogaster OX=7227 GN=Cyt-b5-r PE=4 SV=1;sp|P19967|CYB5R_DROME Cytochrome b5-related protein OS=Drosophila melanogaster OX=7227 GN=Cyt-b5-r PE=2 SV=2	287170000	613740000	48599000	259110000	603420000	41171000	210870000	528290000	37835000	146680000	278390000	26448000	191550000	425660000	73816000	10578000	20594000	5753000	21929000	168120000	64359000	37088000	264520000	89701000	44717000	344790000	124020000	2.0218	2.2907	2.1951	2.0253	2.3641	1.7675	6.5738	6.6266	8.0139	0.21741	0.22966	0.18629	0.20059	0.25665	0.38664	3.1841	2.176	2.6544
A0A0B4KI24;Q27415-2;Q27415	A0A0B4KI24;Q27415-2;Q27415	Nucleoplasmin-like protein	Nlp	tr|A0A0B4KI24|A0A0B4KI24_DROME Nucleoplasmin, isoform B OS=Drosophila melanogaster OX=7227 GN=Nlp PE=3 SV=1;sp|Q27415-2|NLP_DROME Isoform 2 of Nucleoplasmin-like protein OS=Drosophila melanogaster OX=7227 GN=Nlp;sp|Q27415|NLP_DROME Nucleoplasmin-like prote	19431000	25666000	2650000	7030500	18433000	1325600	4978500	12949000	1149100	10513000	9330200	13688000	35699000	20237000	36640000	27881000	18931000	38312000	5540400	18653000	64092000	9628500	20754000	75437000	3034000	10113000	66579000	1.4249	2.4843	2.6254	0.86774	0.54713	0.60615	3.8415	1.9089	3.8649	0.14088	NaN	0.31958	0.99126	0.96152	1.0823	10.057	5.1602	10.803
Q9VB69;E1JIZ5;E1JIZ4	Q9VB69;E1JIZ5;E1JIZ4	Malic enzyme	Men-b	tr|Q9VB69|Q9VB69_DROME Malic enzyme OS=Drosophila melanogaster OX=7227 GN=Men-b PE=1 SV=1;tr|E1JIZ5|E1JIZ5_DROME Malic enzyme OS=Drosophila melanogaster OX=7227 GN=Men-b PE=1 SV=1;tr|E1JIZ4|E1JIZ4_DROME Malic enzyme OS=Drosophila melanogaster OX=7227 GN=Me	0	0	0	0	0	2315000	0	0	0	20421000	5259000	90834000	14875000	3677300	70309000	1411500	332370	5485400	5837300	4387500	63992000	7208300	7573000	79062000	5789800	4789900	85904000	NaN	NaN	NaN	0.33565	0.29972	0.40279	0.93827	0.99666	0.83731	NaN	NaN	NaN	3.5565	3.8509	3.35	8.0785	8.1057	10.208
Q9VG58;Q9BIS2;Q9BIR7;Q8INI8;P82910;P02825	Q9VG58;Q9BIS2;Q9BIR7;Q8INI8;P82910;P02825	Major heat shock 70 kDa protein Bbb;Major heat shock 70 kDa protein Bb;Major heat shock 70 kDa protein Bc;Major heat shock 70 kDa protein Ba;Major heat shock 70 kDa protein Aa;Major heat shock 70 kDa protein Ab	Hsp70Bbb;Hsp70Bb;Hsp70Bc;Hsp70Ba;Hsp70Aa;Hsp70Ab	sp|Q9VG58|HSP74_DROME Major heat shock 70 kDa protein Bbb OS=Drosophila melanogaster OX=7227 GN=Hsp70Bbb PE=3 SV=2;sp|Q9BIS2|HSP73_DROME Major heat shock 70 kDa protein Bb OS=Drosophila melanogaster OX=7227 GN=Hsp70Bb PE=2 SV=2;sp|Q9BIR7|HSP75_DROME Major	56577000	70075000	9606400	143770000	228280000	30522000	38516000	57621000	7504400	43906000	41457000	24029000	48283000	37754000	23041000	2639600	2090100	1114500	14087000	44935000	63315000	7408900	33912000	46619000	16307000	71282000	97851000	1.4754	1.5734	1.4651	0.86153	0.81354	0.80359	3.9099	4.0497	5.1374	0.1591	0.19952	0.16313	0.83685	0.4264	0.43446	3.3794	4.0924	4.2099
P18935	P18935	Cytochrome b	mt:Cyt-b	sp|P18935|CYB_DROME Cytochrome b OS=Drosophila melanogaster OX=7227 GN=mt:Cyt-b PE=3 SV=2	43161000	29544000	15159000	29146000	32744000	16993000	79244000	60891000	32924000	48569000	22776000	114620000	28495000	13873000	70171000	0	0	0	11793000	11712000	62699000	8021900	9797800	51493000	10334000	14756000	66433000	0.73818	0.74403	0.64921	0.45858	0.48772	NaN	0.81972	0.87389	1.0434	0.42855	0.4027	0.37666	1.9271	2.1871	NaN	4.641	6.4552	5.7268
X2JCS6;P46223	X2JCS6;P46223	60S ribosomal protein L7a	RpL7A	tr|X2JCS6|X2JCS6_DROME 60S ribosomal protein L7a OS=Drosophila melanogaster OX=7227 GN=RpL7A PE=3 SV=1;sp|P46223|RL7A_DROME Large ribosomal subunit protein eL8 OS=Drosophila melanogaster OX=7227 GN=RpL7A PE=1 SV=2	175200000	171810000	39373000	248850000	215170000	32099000	175600000	168030000	45880000	77067000	59002000	16910000	8417900	16322000	4896600	8973100	7460100	1988800	31313000	52667000	62292000	29287000	58731000	59213000	34588000	48709000	53337000	0.89481	1.0259	0.99732	0.96685	1.0299	0.89656	2.8713	4.2219	2.7693	0.11081	0.13945	0.18379	0.27495	0.43759	0.22935	2.8756	4.18	2.8224
A0A0B4KED0;Q9W5N2	A0A0B4KED0;Q9W5N2	60S ribosomal protein L38	RpL38	tr|A0A0B4KED0|A0A0B4KED0_DROME Large ribosomal subunit protein eL38 OS=Drosophila melanogaster OX=7227 GN=RpL38 PE=2 SV=1;sp|Q9W5N2|RL38_DROME Large ribosomal subunit protein eL38 OS=Drosophila melanogaster OX=7227 GN=RpL38 PE=1 SV=1	602880000	782570000	139200000	331080000	450630000	76458000	286880000	293120000	56641000	0	0	0	0	0	0	0	0	0	102380000	97859000	62117000	166040000	41424000	84584000	63838000	80046000	116300000	1.4581	1.2187	1.0059	NaN	NaN	NaN	0.88877	0.36005	1.6558	0.23442	0.21387	0.17027	NaN	NaN	NaN	0.70308	0.81469	1.8431
M9MRR7;M9MSK4;M9MRQ6;Q9NFP5	M9MRR7;M9MSK4;M9MRQ6;Q9NFP5	SH3 domain-binding glutamic acid-rich protein homolog	Sh3beta	tr|M9MRR7|M9MRR7_DROME Sh3beta, isoform C OS=Drosophila melanogaster OX=7227 GN=Sh3beta PE=3 SV=1;tr|M9MSK4|M9MSK4_DROME Sh3beta, isoform D OS=Drosophila melanogaster OX=7227 GN=Sh3beta PE=3 SV=1;tr|M9MRQ6|M9MRQ6_DROME Sh3beta, isoform E OS=Drosophila mela	0	0	0	0	0	0	0	0	0	19447000	13861000	24187000	22459000	13175000	24478000	31022000	17611000	46755000	17001000	51625000	61963000	29359000	71106000	85090000	8275300	19651000	23956000	NaN	NaN	NaN	0.75503	0.65313	0.46503	2.4318	2.6871	2.5836	NaN	NaN	NaN	1.1747	0.87112	1.0722	3.9971	2.1348	2.7471
P21914;Q9VWN3	P21914	Succinate dehydrogenase [ubiquinone] iron-sulfur subunit, mitochondrial	SdhB	sp|P21914|SDHB_DROME Succinate dehydrogenase [ubiquinone] iron-sulfur subunit, mitochondrial OS=Drosophila melanogaster OX=7227 GN=SdhB PE=2 SV=2	11546000	10355000	4210900	27832000	29148000	9965300	5161400	5786300	1946600	33192000	11866000	44758000	55966000	22250000	64321000	1025700	347600	1389800	14321000	19411000	61873000	8571500	9153600	31501000	8322800	18217000	51956000	0.90421	0.95023	1.1548	0.35276	0.27453	0.30653	1.6139	1.3161	1.8096	0.36495	0.31059	0.3851	1.1789	1.3176	1.4547	4.1432	4.5972	5.2713
P22465-2;P22465	P22465-2;P22465	Annexin B10	AnxB10	sp|P22465-2|ANX10_DROME Isoform A of Annexin B10 OS=Drosophila melanogaster OX=7227 GN=AnxB10;sp|P22465|ANX10_DROME Annexin B10 OS=Drosophila melanogaster OX=7227 GN=AnxB10 PE=2 SV=3	79773000	77776000	43394000	66718000	53163000	24737000	66714000	45953000	14969000	89411000	58334000	41488000	82262000	54189000	40165000	8862900	3978300	3761500	16609000	54172000	61432000	14440000	45848000	61217000	18652000	66389000	90749000	0.82667	0.98685	0.70834	0.61515	0.65382	0.37168	3.0394	2.9023	3.5411	0.21467	0.19478	0.18301	0.4001	0.44315	0.35016	3.0199	3.2952	3.6814
Q9VMV9;E1JHT6	Q9VMV9;E1JHT6	Reticulon-like protein	Rtnl1	tr|Q9VMV9|Q9VMV9_DROME Reticulon-like protein OS=Drosophila melanogaster OX=7227 GN=Rtnl1 PE=1 SV=2;tr|E1JHT6|E1JHT6_DROME Reticulon-like protein OS=Drosophila melanogaster OX=7227 GN=Rtnl1 PE=1 SV=1	0	0	0	15694000	22714000	21759000	16298000	16499000	22893000	41815000	24444000	46421000	70064000	41614000	102440000	4731900	2692500	9505200	7076800	16868000	60989000	10020000	18174000	54657000	17441000	43826000	140710000	NaN	1.7508	1.0344	0.58715	0.61439	0.49703	1.9384	2.3339	2.3599	NaN	0.44334	0.9969	0.95628	0.96465	1.1618	5.2766	5.3788	5.9335
Q9VSL3;Q9VSL6	Q9VSL3;Q9VSL6	Pyrimidodiazepine synthase	se;GstO1	sp|Q9VSL3|SEPIA_DROME Pyrimidodiazepine synthase OS=Drosophila melanogaster OX=7227 GN=se PE=1 SV=1;tr|Q9VSL6|Q9VSL6_DROME Glutathione S transferase O1 OS=Drosophila melanogaster OX=7227 GN=GstO1 PE=1 SV=1	0	0	0	0	0	0	0	0	0	10677000	5221900	35287000	10340000	6085800	39917000	887060	593760	2954500	3578400	6073800	60800000	13896000	5036300	62566000	5863600	6015600	84647000	NaN	NaN	NaN	0.61069	0.60594	0.68378	3.1906	0.40015	1.0285	NaN	NaN	NaN	2.5645	2.9696	2.388	31.326	4.5486	12.348
Q9VUY9	Q9VUY9	Phosphoglucomutase	Pgm	sp|Q9VUY9|PGM_DROME Phosphoglucomutase OS=Drosophila melanogaster OX=7227 GN=Pgm1 PE=1 SV=1	604870000	599110000	196200000	773980000	842680000	221900000	593170000	595020000	173490000	97284000	116370000	38869000	89309000	115000000	34293000	3878800	4918700	1890900	22429000	74541000	60743000	57566000	70194000	60142000	27718000	128540000	94284000	0.99212	1.0328	0.99764	1.1869	1.159	1.3996	3.3922	3.8886	4.7665	0.31787	0.25716	0.2803	0.3149	0.43743	0.35243	2.5881	2.777	2.9031
P48148	P48148	Ras-like GTP-binding protein Rho1	Rho1	sp|P48148|RHO1_DROME Ras-like GTP-binding protein Rho1 OS=Drosophila melanogaster OX=7227 GN=Rho1 PE=1 SV=1	9327700	16437000	1511600	12624000	28034000	2444700	9875900	23931000	1242200	39319000	37917000	46112000	21860000	21456000	41493000	0	0	0	10313000	15543000	60681000	1845400	4670000	12621000	11057000	30304000	83404000	1.7243	1.4434	2.0533	1.0976	0.91637	NaN	1.3716	2.2107	3.597	0.19659	0.15749	NaN	1.4485	1.3115	NaN	4.7434	7.041	8.0548
C0HK92;A0A0B4LGZ7	C0HK92;A0A0B4LGZ7			sp|C0HK92|Y5076_DROME Uncharacterized protein CG45076 OS=Drosophila melanogaster OX=7227 GN=CG45076 PE=1 SV=1;tr|A0A0B4LGZ7|A0A0B4LGZ7_DROME Uncharacterized protein, isoform H OS=Drosophila melanogaster OX=7227 GN=Dmel\CG45076 PE=4 SV=1	57205000	16122000	96448000	59089000	20094000	93863000	62639000	23427000	93289000	14939000	5224200	54279000	10688000	3198400	48804000	1473900	598560	4292500	5581400	5057300	60288000	7394500	6121600	55313000	3846800	2082700	40962000	0.203	0.20643	0.20646	0.41427	0.22183	0.70343	0.83073	0.74882	0.4786	2.0276	1.7414	1.5977	3.8705	4.3594	2.6456	7.1986	7.0532	17.764
A0A0B4JD11;Q9NJH0	A0A0B4JD11;Q9NJH0	Elongation factor 1-gamma	Ef1gamma	tr|A0A0B4JD11|A0A0B4JD11_DROME Eukaryotic translation elongation factor 1 gamma, isoform C OS=Drosophila melanogaster OX=7227 GN=eEF1gamma PE=4 SV=1;sp|Q9NJH0|EF1G_DROME Elongation factor 1-gamma OS=Drosophila melanogaster OX=7227 GN=eEF1gamma PE=2 SV=2	191180000	303360000	53743000	184040000	324600000	45212000	127350000	211550000	35870000	87972000	113140000	41290000	58656000	83638000	39125000	2631400	2324800	1222000	14085000	57328000	60231000	10372000	57970000	49305000	15755000	94634000	87567000	1.5529	1.8112	1.5726	1.2151	1.1265	1.0088	3.8984	4.2022	6.2631	0.21644	0.21922	0.20751	0.50597	0.4978	0.4041	3.9703	3.8243	6.0585
Q0E9B6;A1Z8U9	Q0E9B6;A1Z8U9	40S ribosomal protein S11	RpS11	sp|Q0E9B6|RS11_DROME Small ribosomal subunit protein uS17 OS=Drosophila melanogaster OX=7227 GN=RpS11 PE=1 SV=1;tr|A1Z8U9|A1Z8U9_DROME Small ribosomal subunit protein uS17 OS=Drosophila melanogaster OX=7227 GN=RpS11 PE=1 SV=1	147530000	166960000	31318000	154210000	184030000	27686000	113920000	144170000	27306000	65572000	68516000	25315000	49287000	54953000	23813000	3121700	2648800	1106400	13228000	40779000	59880000	12382000	54055000	69775000	13602000	59747000	73887000	1.2116	1.35	1.1645	1.1094	1.1456	0.92083	3.0697	4.9055	5.1096	0.21999	0.21337	0.25011	0.3709	0.36004	0.35098	4.1174	5.308	6.385
A4V449;Q94511	A4V449;Q94511	NADH-ubiquinone oxidoreductase 75 kDa subunit, mitochondrial	ND-75;ND75	tr|A4V449|A4V449_DROME NADH-ubiquinone oxidoreductase 75 kDa subunit, mitochondrial OS=Drosophila melanogaster OX=7227 GN=ND-75 PE=1 SV=1;sp|Q94511|NDUS1_DROME NADH-ubiquinone oxidoreductase 75 kDa subunit, mitochondrial OS=Drosophila melanogaster OX=7227	66228000	54030000	15071000	68787000	64845000	18897000	45998000	44307000	13063000	54328000	24276000	58567000	48018000	28697000	58331000	928000	405580	1539800	17158000	26122000	59095000	10928000	21521000	67211000	18253000	40401000	88248000	0.88378	0.96409	0.96149	0.53472	0.46298	0.49594	1.4825	1.5824	1.5104	0.3038	0.30657	0.31647	1.1042	1.1406	1.5218	4.0773	4.9107	5.1057
E1JJA5;E1JJA4;A4V4J0;M9PJN9;A4V4I8;X2JE15;M9PHQ0;P27619-2;P27619	E1JJA5;E1JJA4;A4V4J0;M9PJN9;A4V4I8;X2JE15;M9PHQ0;P27619-2;P27619	Dynamin	shi	tr|E1JJA5|E1JJA5_DROME dynamin GTPase OS=Drosophila melanogaster OX=7227 GN=shi PE=1 SV=1;tr|E1JJA4|E1JJA4_DROME dynamin GTPase OS=Drosophila melanogaster OX=7227 GN=shi PE=1 SV=1;tr|A4V4J0|A4V4J0_DROME dynamin GTPase OS=Drosophila melanogaster OX=7227 GN=	0	0	0	0	0	0	0	0	0	50729000	14257000	66917000	26168000	8556700	40561000	1143900	57697	923930	14432000	9892600	57695000	18784000	6699300	36541000	16968000	7826000	41684000	NaN	NaN	NaN	0.27423	0.29475	0.18259	1.5174	1.1421	1.6348	NaN	NaN	NaN	1.6361	1.7514	1.5743	8.0791	6.0002	11.535
P55828	P55828	40S ribosomal protein S20	RpS20	sp|P55828|RS20_DROME Small ribosomal subunit protein uS10 OS=Drosophila melanogaster OX=7227 GN=RpS20 PE=1 SV=1	274700000	78752000	27150000	339530000	171140000	28315000	330050000	81062000	17922000	117430000	68133000	26599000	88739000	38887000	14163000	4300100	2341100	1216000	53438000	27626000	56215000	86637000	73682000	83474000	124830000	57153000	87377000	0.37397	0.88292	0.26705	0.51696	0.66576	0.74419	0.98937	1.0139	0.47658	0.086127	0.15163	0.07161	0.32706	0.2378	0.25276	2.0462	1.417	1.0883
Q24583	Q24583	V-type proton ATPase subunit F 1	Vha14-1	sp|Q24583|VATF1_DROME V-type proton ATPase subunit F 1 OS=Drosophila melanogaster OX=7227 GN=Vha14-1 PE=1 SV=1	25496000	40108000	8291900	41379000	51975000	10141000	15594000	18143000	4798000	78765000	22782000	34021000	83033000	43016000	40672000	24922000	12540000	19650000	34579000	25011000	56212000	40053000	33235000	67834000	24504000	20028000	45979000	1.4174	1.3251	1.2774	0.27695	0.51478	0.48185	1.4819	2.1538	1.2435	0.3336	0.24042	0.27825	0.41317	0.50386	0.68198	1.2761	1.2068	2.5753
P22464-2;A0A0B4KH34;P22464-3;P22464	P22464-2;A0A0B4KH34;P22464-3;P22464	Annexin B9;Annexin	AnxB9	sp|P22464-2|ANXB9_DROME Isoform b of Annexin B9 OS=Drosophila melanogaster OX=7227 GN=AnxB9;tr|A0A0B4KH34|A0A0B4KH34_DROME Annexin OS=Drosophila melanogaster OX=7227 GN=AnxB9 PE=1 SV=1;sp|P22464-3|ANXB9_DROME Isoform c of Annexin B9 OS=Drosophila melanogas	45636000	26206000	14003000	46281000	26468000	14789000	58304000	34387000	19558000	89355000	52438000	69741000	85088000	53764000	61170000	10308000	5125500	5218700	13175000	31250000	56019000	17206000	49087000	82574000	16307000	51784000	71122000	0.57755	0.66913	0.54258	0.63287	0.72144	0.50371	2.9691	2.5272	2.9852	0.29367	0.32282	0.33528	0.48473	0.52164	0.47739	3.9372	3.865	4.6965
Q7KTW5	Q7KTW5			tr|Q7KTW5|Q7KTW5_DROME Inositol-1-monophosphatase OS=Drosophila melanogaster OX=7227 GN=Dmel\CG9391 PE=1 SV=1	25032000	35809000	9083900	48133000	65977000	14535000	39070000	53966000	13970000	79428000	49378000	62219000	75567000	63384000	49775000	2899800	2219600	2603400	15363000	32314000	55748000	18522000	44566000	77502000	9300700	48230000	53292000	1.3998	1.15	1.6798	0.52019	0.67023	1.038	1.8632	2.3044	3.359	0.22109	0.31675	0.24639	0.66743	0.68314	0.97023	3.1952	3.1858	4.4805
Q95SI7	Q95SI7			tr|Q95SI7|Q95SI7_DROME GH23390p OS=Drosophila melanogaster OX=7227 GN=Dmel\CG6028 PE=1 SV=1	111660000	144110000	44625000	147250000	214150000	45334000	114470000	143900000	34829000	36044000	30815000	18554000	31907000	32754000	17063000	0	0	0	32455000	42927000	55567000	33799000	50797000	54314000	26812000	57811000	68698000	1.2203	1.527	1.2662	0.90072	1.012	NaN	1.4351	1.4212	0.75942	0.36704	0.30835	0.3151	0.43872	0.46933	NaN	1.3295	1.4466	1.0274
O02649;Q9VMN5	O02649	60 kDa heat shock protein, mitochondrial	Hsp60	sp|O02649|CH60A_DROME Heat shock protein 60A OS=Drosophila melanogaster OX=7227 GN=Hsp60A PE=1 SV=3	168310000	201700000	64606000	189550000	221290000	406270000	146270000	180900000	240480000	97989000	84571000	51349000	60700000	56093000	22309000	13184000	11520000	6069600	15240000	37998000	54882000	30897000	51053000	62886000	45566000	94456000	130870000	1.3195	1.2329	1.2837	1.0589	1.1064	0.95744	2.6377	4.0945	3.6434	0.2291	0.25119	0.28103	0.43975	0.34192	0.42317	4.0028	4.225	4.9375
C9QP42;Q02748;Q9VHS8	C9QP42;Q02748	Eukaryotic initiation factor 4A	eIF-4a	tr|C9QP42|C9QP42_DROME RNA helicase OS=Drosophila melanogaster OX=7227 GN=eIF4A PE=1 SV=1;sp|Q02748|IF4A_DROME Eukaryotic initiation factor 4A OS=Drosophila melanogaster OX=7227 GN=eIF4A PE=1 SV=3	114300000	140280000	22275000	123970000	175080000	42432000	111190000	150500000	21858000	65490000	69108000	17781000	53090000	65325000	23409000	4486000	4568800	1985600	12379000	52390000	54875000	8911700	39786000	40042000	13004000	72777000	78246000	1.2721	1.472	1.4395	0.99187	1.2163	1.0922	2.4522	4.0152	4.9004	0.20039	0.16598	0.1627	0.31157	0.37653	0.42603	3.0447	3.98	5.1367
Q9V3W2	Q9V3W2		ND-B17	tr|Q9V3W2|Q9V3W2_DROME GM23292p OS=Drosophila melanogaster OX=7227 GN=ND-B17 PE=1 SV=1	0	0	0	0	0	0	8649200	6264500	3040500	28773000	36417000	46206000	27417000	41899000	42655000	331850	105130	756150	14175000	28676000	54467000	972440	1259300	13224000	1551900	2248300	9380400	NaN	NaN	0.74568	1.237	1.2977	0.72947	2.0738	1.2707	1.4023	NaN	NaN	0.37472	1.5817	1.6828	1.9689	5.1035	5.5313	6.608
A0A0B4LF57;P62152	A0A0B4LF57;P62152	Calmodulin	Cam	tr|A0A0B4LF57|A0A0B4LF57_DROME Calmodulin, isoform C OS=Drosophila melanogaster OX=7227 GN=Cam PE=1 SV=1;sp|P62152|CALM_DROME Calmodulin OS=Drosophila melanogaster OX=7227 GN=Cam PE=1 SV=2	248840000	298310000	113010000	427970000	485840000	154140000	317720000	425300000	118440000	836250000	329590000	1.0301e+09	921050000	378610000	1089200000	707960000	254480000	910590000	12576000	17907000	53987000	18888000	20273000	65996000	15884000	20942000	70891000	1.2119	1.2164	1.2227	0.36826	0.35423	0.38482	1.1979	1.1203	0.95272	0.33239	0.2884	0.34303	1.0732	1.0798	1.1781	4.1208	4.3517	3.128
Q9VLB7	Q9VLB7		Gdi	tr|Q9VLB7|Q9VLB7_DROME Rab GDP dissociation inhibitor OS=Drosophila melanogaster OX=7227 GN=Gdi PE=1 SV=1	23065000	35983000	8796500	33722000	54121000	9137600	34478000	49603000	13974000	22725000	16891000	31214000	40752000	31903000	51418000	0	0	0	12126000	28087000	53595000	11009000	19555000	51999000	12245000	32128000	66489000	1.6776	1.9362	1.4021	0.68661	0.66099	NaN	2.7619	2.7066	2.4087	0.39808	0.33497	0.19961	1.2098	1.161	NaN	5.5854	6.1244	5.5622
Q9VAN0	Q9VAN0	Probable phosphoserine aminotransferase	CG11899	sp|Q9VAN0|SERC_DROME Probable phosphoserine aminotransferase OS=Drosophila melanogaster OX=7227 GN=CG11899 PE=2 SV=1	248990000	368480000	130640000	333120000	492900000	105380000	298520000	428710000	171960000	108060000	203340000	26110000	116720000	235390000	43237000	6016500	10614000	690150	42972000	113670000	53478000	56566000	143230000	73965000	75061000	203970000	79147000	1.3305	1.3901	1.4476	1.83	1.8279	1.8651	4.2926	5.4051	7.1562	0.20334	0.19055	0.20216	0.14831	0.16594	0.18488	2.307	2.4269	3.0034
Q9VNB9	Q9VNB9		RpL35A	tr|Q9VNB9|Q9VNB9_DROME Large ribosomal subunit protein eL33 OS=Drosophila melanogaster OX=7227 GN=RpL35A PE=1 SV=1	48305000	66547000	9610300	157940000	225080000	30066000	29920000	57298000	11624000	15932000	15174000	5090100	12504000	18144000	5825400	0	0	0	19257000	59498000	53026000	8040800	37514000	29021000	3680400	15326000	16219000	1.0126	1.7658	1.8168	1.0342	1.185	NaN	2.7203	5.7643	4.0597	0.17917	0.2125	0.2804	0.26569	0.46246	NaN	3.2819	4.2873	3.9124
A4V383;P91929	A4V383;P91929	NADH dehydrogenase [ubiquinone] 1 alpha subcomplex subunit 10, mitochondrial	ND-42;ND42	tr|A4V383|A4V383_DROME NADH dehydrogenase [ubiquinone] 1 alpha subcomplex subunit 10, mitochondrial OS=Drosophila melanogaster OX=7227 GN=ND-42 PE=1 SV=1;sp|P91929|NDUAA_DROME NADH dehydrogenase [ubiquinone] 1 alpha subcomplex subunit 10, mitochondrial OS=	62163000	52238000	26625000	56015000	47421000	18663000	39926000	33731000	18944000	23916000	17934000	43221000	51344000	27364000	82177000	0	0	0	10068000	11598000	53009000	8218300	13429000	58551000	6350900	10786000	47614000	0.79942	0.80959	0.67253	0.46728	0.49235	NaN	1.0756	1.6191	1.6215	0.38455	0.34339	0.3454	1.6148	1.6691	NaN	5.0003	5.945	5.7091
Q8SY58	Q8SY58			tr|Q8SY58|Q8SY58_DROME Ketimine reductase mu-crystallin OS=Drosophila melanogaster OX=7227 GN=Dmel\CG4872 PE=1 SV=1	6729900	6172400	1025500	5216400	6086800	1105500	6354100	5530200	1719300	19608000	6552900	59605000	17618000	5160300	52419000	0	0	0	5166200	8580000	52480000	3904900	7239700	57452000	4929000	10615000	69522000	1.0647	1.0931	0.86951	0.34921	0.29602	NaN	1.8961	1.4268	1.9418	0.20871	0.27544	0.20376	2.6015	2.3503	NaN	9.1603	11.053	12.998
A0A023GQA5;P24156	A0A023GQA5;P24156	Protein l(2)37Cc	l(2)37Cc	tr|A0A023GQA5|A0A023GQA5_DROME Prohibitin OS=Drosophila melanogaster OX=7227 GN=Phb1 PE=1 SV=1;sp|P24156|PHB1_DROME Prohibitin 1 OS=Drosophila melanogaster OX=7227 GN=Phb1 PE=2 SV=2	59012000	45814000	71998000	58461000	50698000	62425000	62589000	74147000	64304000	25542000	20425000	39546000	24757000	18842000	34595000	2513100	1878000	3154000	6458100	18314000	52230000	5236200	15828000	46471000	6915300	22080000	67469000	0.93264	0.83416	0.88538	0.698	0.69066	0.67004	3.4661	2.7684	3.0475	0.42973	0.36782	0.46628	1.2262	1.3541	0.91724	6.8806	7.1718	9.1988
M9MRF2;Q9VMU4	M9MRF2;Q9VMU4	60S ribosomal protein L37a	RpL37A	tr|M9MRF2|M9MRF2_DROME Large ribosomal subunit protein eL43 OS=Drosophila melanogaster OX=7227 GN=RpL37A PE=2 SV=1;sp|Q9VMU4|RL37A_DROME Large ribosomal subunit protein eL43 OS=Drosophila melanogaster OX=7227 GN=RpL37A PE=1 SV=3	0	0	0	27821000	35525000	12329000	0	0	0	0	0	0	0	0	0	0	0	0	15858000	47601000	51320000	0	0	0	0	0	0	NaN	1.3138	NaN	NaN	NaN	NaN	3.6075	NaN	NaN	NaN	0.58099	NaN	NaN	NaN	NaN	3.5609	NaN	NaN
Q9U1L2	Q9U1L2		EG:BACR7A4.14	tr|Q9U1L2|Q9U1L2_DROME EG:BACR7A4.14 protein OS=Drosophila melanogaster OX=7227 GN=EG:BACR7A4.14 PE=1 SV=1	217460000	466980000	90234000	163690000	382150000	61220000	185330000	424970000	82611000	89114000	184220000	14306000	60641000	153470000	11859000	1647700	5048400	326420	16319000	83824000	51173000	19610000	97188000	53128000	27451000	164890000	71107000	2.6248	2.4863	2.3351	2.1604	2.6562	2.6787	6.8095	7.2132	9.7115	0.39488	0.45681	0.41972	0.16657	0.22885	0.27851	2.7338	3.3912	3.6049
A0A0B4LFP4;A8DYH2	A0A0B4LFP4;A8DYH2	Ubiquitin-fold modifier 1	CG34191	tr|A0A0B4LFP4|A0A0B4LFP4_DROME Ubiquitin-fold modifier 1 OS=Drosophila melanogaster OX=7227 GN=Ufm1 PE=3 SV=1;sp|A8DYH2|UFM1_DROME Ubiquitin-fold modifier 1 OS=Drosophila melanogaster OX=7227 GN=Ufm1 PE=1 SV=1	65598000	78411000	13101000	0	0	0	56408000	79543000	14830000	63610000	48883000	10460000	50308000	40687000	19222000	12081000	11931000	6449400	12370000	43594000	50911000	11295000	34089000	33503000	10682000	53842000	52790000	1.1856	NaN	1.6186	0.95864	0.78908	1.0264	3.3943	3.5716	3.6273	0.18368	NaN	0.29401	0.19842	0.35989	0.42357	2.934	3.5949	3.8942
Q9VXZ0	Q9VXZ0		ND-B18	tr|Q9VXZ0|Q9VXZ0_DROME NADH dehydrogenase [ubiquinone] 1 beta subcomplex subunit 7 OS=Drosophila melanogaster OX=7227 GN=ND-B18 PE=1 SV=1	21428000	10876000	8835000	69704000	53077000	31645000	63376000	34370000	31743000	42840000	22947000	61568000	16735000	5569900	37400000	1332400	1219000	4766200	33354000	19739000	50444000	6052800	8944200	41376000	5598800	9261000	39233000	0.6302	0.59668	0.6636	0.45087	0.4168	0.50806	0.7015	1.5749	1.3241	0.39243	0.42275	0.46359	1.1317	2.2179	2.7888	1.9746	7.2451	5.9583
Q7KLX3	Q7KLX3		Tapdelta	tr|Q7KLX3|Q7KLX3_DROME Translocon-associated protein subunit delta OS=Drosophila melanogaster OX=7227 GN=Tapdelta PE=1 SV=1	82192000	133130000	14360000	70005000	95434000	12419000	89673000	125120000	9468400	155260000	156200000	32383000	85607000	79339000	18690000	0	0	0	23530000	65889000	50339000	10120000	45133000	16848000	27593000	119830000	79804000	1.4557	1.2743	1.4812	1.0396	1.0304	NaN	3.4215	2.9385	3.8593	0.16082	0.17197	0.10917	0.23969	0.2168	NaN	2.1393	1.418	2.6307
A4V3Q6;P05303	A4V3Q6;P05303	Elongation factor 1-alpha;Elongation factor 1-alpha 2	Ef1alpha100E	tr|A4V3Q6|A4V3Q6_DROME Elongation factor 1-alpha OS=Drosophila melanogaster OX=7227 GN=eEF1alpha2 PE=1 SV=1;sp|P05303|EF1A2_DROME Elongation factor 1-alpha 2 OS=Drosophila melanogaster OX=7227 GN=eEF1alpha2 PE=2 SV=2	0	0	0	0	0	0	0	0	0	17502000	5301100	30553000	16573000	4146100	26846000	503720	244820	2516900	3858500	5177900	50298000	587650	1632500	14185000	6057400	3835600	36259000	NaN	NaN	NaN	0.31195	0.30213	0.42188	1.1908	3.4723	0.40186	NaN	NaN	NaN	1.2646	1.3651	1.3818	8.7724	17.225	2.5464
Q9VF27	Q9VF27		ND-23	sp|Q9VF27|NDUS8_DROME NADH dehydrogenase (ubiquinone) 23 kDa subunit OS=Drosophila melanogaster OX=7227 GN=ND-23 PE=1 SV=1	14327000	9552000	3240900	42355000	46853000	25593000	39705000	30666000	17036000	108830000	87070000	119810000	67280000	36825000	82382000	1443800	1682900	1448800	9859100	14877000	49795000	14555000	25417000	83036000	15594000	28113000	96536000	0.76945	1.1207	0.84905	0.51484	0.53794	0.94077	1.854	1.7226	1.6768	0.23152	0.69968	0.39556	1.1161	1.1332	1.0055	5.2647	5.2813	4.873
Q24400	Q24400	Muscle LIM protein Mlp84B	Mlp84B	sp|Q24400|MLP2_DROME Muscle LIM protein Mlp84B OS=Drosophila melanogaster OX=7227 GN=Mlp84B PE=1 SV=1	48850000	8064700	61656000	56990000	9858500	49982000	43817000	7608900	54205000	29889000	6022000	56436000	27437000	4567700	43018000	11277000	2287100	19000000	9338700	9648000	49583000	7993700	4212500	52034000	10816000	10114000	56662000	0.15881	0.11752	0.20646	0.18538	0.19048	0.20407	0.95553	0.88853	1.429	1.3224	1.4621	1.2057	1.4484	1.5248	1.3836	4.9794	4.663	6.0991
Q8IQW2;Q9VWD1	Q8IQW2;Q9VWD1		COX6B	tr|Q8IQW2|Q8IQW2_DROME Cytochrome c oxidase subunit OS=Drosophila melanogaster OX=7227 GN=COX6B PE=1 SV=1;tr|Q9VWD1|Q9VWD1_DROME Cytochrome c oxidase subunit OS=Drosophila melanogaster OX=7227 GN=COX6B PE=1 SV=2	199210000	179280000	57215000	203620000	186260000	64289000	301740000	186590000	57095000	31379000	32058000	46582000	16503000	6225100	22846000	63070000	48412000	98255000	17043000	27835000	49334000	24483000	47664000	54538000	32538000	31027000	88626000	0.80688	0.94374	0.93445	0.50793	0.37563	0.83594	1.4441	2.2256	1.026	0.33983	0.26338	0.2423	1.5486	1.5434	1.6163	4.2014	3.6638	2.687
Q7JX87;A1Z892;A1Z893	Q7JX87;A1Z892;A1Z893		Prx2540-2;Prx2540-1;CG12896-RA	tr|Q7JX87|Q7JX87_DROME Peroxiredoxin 2540-2 OS=Drosophila melanogaster OX=7227 GN=Prx6c PE=1 SV=1;tr|A1Z892|A1Z892_DROME LD11278p OS=Drosophila melanogaster OX=7227 GN=Prx6b PE=2 SV=1;tr|A1Z893|A1Z893_DROME DI01187p OS=Drosophila melanogaster OX=7227 GN=Dm	262240000	250020000	238990000	312380000	374070000	277940000	259630000	240050000	239590000	159430000	53759000	14455000	35918000	48666000	88427000	1269300	1132500	309680	377360000	58567000	48649000	357840000	57088000	56767000	129600000	85803000	93516000	0.84218	0.92464	0.91314	0.90411	1.1927	0.62486	3.8057	3.2886	4.174	0.24712	0.21535	0.21443	0.24286	0.35909	0.17981	2.9462	2.575	3.0065
A0A0B4LFW3;Q7K088	A0A0B4LFW3;Q7K088		Obp56e	tr|A0A0B4LFW3|A0A0B4LFW3_DROME Odorant-binding protein 56e, isoform B OS=Drosophila melanogaster OX=7227 GN=Obp56e PE=1 SV=1;tr|Q7K088|Q7K088_DROME GEO08224p1 OS=Drosophila melanogaster OX=7227 GN=Obp56e PE=1 SV=1	0	0	0	0	0	0	0	0	0	57880000	79302000	13761000	53328000	76773000	12421000	65075000	106880000	10000000	19619000	121490000	48430000	12335000	61164000	34238000	16716000	108590000	57738000	NaN	NaN	NaN	1.4157	1.5673	1.5477	4.8596	4.5976	6.2311	NaN	NaN	NaN	0.33789	0.28553	0.16366	2.3594	2.5537	3.0181
O97479	O97479		Sodh-1	tr|O97479|O97479_DROME Sorbitol dehydrogenase OS=Drosophila melanogaster OX=7227 GN=Sodh1 PE=1 SV=1	278580000	697500000	125750000	259500000	718920000	96096000	270390000	671570000	98263000	62686000	122190000	22101000	35491000	67610000	17940000	0	0	0	26838000	107250000	48335000	15634000	58520000	24526000	39948000	153990000	73093000	2.4368	2.6894	2.5573	2.0003	2.1977	NaN	5.4704	6.7515	4.1657	0.30153	0.23498	0.24502	0.33817	0.38354	NaN	2.5027	2.492	1.3779
A0A0B4KHL7;P91928;A0A0B4KGN2;P91928-2	A0A0B4KHL7;P91928;A0A0B4KGN2	MICOS complex subunit Mic60	CG6455	tr|A0A0B4KHL7|A0A0B4KHL7_DROME MICOS complex subunit MIC60 OS=Drosophila melanogaster OX=7227 GN=Mitofilin PE=3 SV=1;sp|P91928|MIC60_DROME MICOS complex subunit Mic60 OS=Drosophila melanogaster OX=7227 GN=Mitofilin PE=1 SV=4;tr|A0A0B4KGN2|A0A0B4KGN2_DROME	50025000	35767000	17272000	39085000	32665000	16181000	47710000	37810000	17664000	27329000	12881000	43757000	20524000	10231000	44602000	3305900	1289100	4851200	17094000	13032000	48279000	15271000	14636000	60823000	12874000	18908000	76363000	0.78488	0.82047	0.85576	0.4664	0.4102	0.36286	1.6938	1.6412	1.9754	0.33692	0.32613	0.29941	1.5142	1.6682	1.4189	5.4027	6.5074	7.224
Q7KN62;A0A0B4LFZ4;Q7KN62-2;Q7KN62-3	Q7KN62;A0A0B4LFZ4;Q7KN62-2;Q7KN62-3	Transitional endoplasmic reticulum ATPase TER94	TER94	sp|Q7KN62|TERA_DROME Transitional endoplasmic reticulum ATPase TER94 OS=Drosophila melanogaster OX=7227 GN=TER94 PE=1 SV=1;tr|A0A0B4LFZ4|A0A0B4LFZ4_DROME vesicle-fusing ATPase OS=Drosophila melanogaster OX=7227 GN=TER94 PE=1 SV=1;sp|Q7KN62-2|TERA_DROME Iso	72724000	101310000	16890000	74089000	121440000	17463000	73459000	108390000	19840000	50419000	48082000	31018000	29464000	29279000	25686000	1559800	858400	694160	16595000	34331000	48005000	10539000	22791000	32108000	18938000	41299000	54900000	1.2294	1.5996	1.4366	0.93603	1.0085	1.0594	4.1398	2.7506	2.9448	0.16572	0.23819	0.24078	0.43214	0.6584	0.47314	4.3532	3.0541	3.0023
Q8MST5;Q9VAX7;CON__ENSEMBL:ENSBTAP00000025008	Q8MST5;Q9VAX7		betaTub97EF	tr|Q8MST5|Q8MST5_DROME Tubulin beta chain OS=Drosophila melanogaster OX=7227 GN=betaTub97EF PE=1 SV=1;tr|Q9VAX7|Q9VAX7_DROME Tubulin beta chain OS=Drosophila melanogaster OX=7227 GN=betaTub97EF PE=1 SV=3	175650000	67392000	64163000	179820000	70673000	57677000	143280000	52224000	51294000	58236000	26234000	43058000	40063000	16401000	35342000	1249400	666370	753670	13440000	21759000	47939000	9661300	16281000	31050000	18636000	33284000	69887000	0.38762	0.40438	0.34011	0.40169	0.40765	0.61128	1.4883	1.5751	1.5832	0.29821	0.29215	0.26861	0.70847	0.67771	0.60981	3.3305	3.1595	3.3883
Q9W1B9	Q9W1B9		RpL12	tr|Q9W1B9|Q9W1B9_DROME Large ribosomal subunit protein uL11 OS=Drosophila melanogaster OX=7227 GN=RpL12 PE=1 SV=1	77003000	83138000	12839000	121960000	145140000	17072000	92412000	85128000	13789000	58813000	51957000	15249000	52270000	40204000	15967000	7873600	5608300	2160200	11856000	39850000	46675000	10185000	42798000	42843000	12539000	60965000	49993000	1.1375	1.2049	1.0156	1.0403	0.83092	0.72508	3.2191	4.2672	4.2416	0.18378	0.13583	0.21105	0.33125	0.3239	0.3148	3.2167	3.5638	3.4151
X2J950;Q03334	X2J950;Q03334	40S ribosomal protein S13	RpS13	tr|X2J950|X2J950_DROME Small ribosomal subunit protein uS15 OS=Drosophila melanogaster OX=7227 GN=RpS13 PE=2 SV=1;sp|Q03334|RS13_DROME Small ribosomal subunit protein uS15 OS=Drosophila melanogaster OX=7227 GN=RpS13 PE=1 SV=3	144220000	180910000	28425000	160360000	220150000	35444000	150460000	186020000	31367000	58055000	70100000	21313000	44269000	56014000	13446000	3619600	4767300	1866100	14250000	59588000	46674000	17074000	62815000	56680000	19005000	79145000	77133000	1.2751	1.3	1.239	1.0908	1.3281	1.2984	3.2847	4.036	3.7614	0.22797	0.20495	0.20633	0.37134	0.30738	0.49722	3.2234	3.6138	4.0035
Q9VSU6	Q9VSU6		Dhpr	tr|Q9VSU6|Q9VSU6_DROME Dihydropteridine reductase OS=Drosophila melanogaster OX=7227 GN=Dhpr PE=1 SV=1	38666000	39556000	9853000	48569000	54379000	12647000	31918000	28498000	9676100	87953000	99695000	43158000	38324000	48462000	21002000	5771800	6738000	2763100	14195000	47247000	46406000	7580100	30487000	24596000	20973000	82695000	76898000	1.1604	1.1966	1.0361	0.91684	1.262	1.2437	3.3913	3.5475	4.5145	0.25011	0.36531	0.32243	0.40053	0.41241	0.42437	3.1677	2.8797	3.2074
A0A0B4K6P6;P47947	A0A0B4K6P6;P47947	Troponin C, isoform 1	TpnC41C	tr|A0A0B4K6P6|A0A0B4K6P6_DROME GEO08241p1 OS=Drosophila melanogaster OX=7227 GN=TpnC41C PE=2 SV=1;sp|P47947|TNNC1_DROME Troponin C, isoform 1 OS=Drosophila melanogaster OX=7227 GN=TpnC41C PE=2 SV=2	0	0	0	0	0	0	7957600	13311000	20016000	0	0	0	16944000	6064300	64268000	50620000	8357800	120540000	12753000	11046000	46316000	0	0	0	0	0	0	NaN	NaN	1.3368	NaN	0.2778	0.28346	0.97803	NaN	NaN	NaN	NaN	2.1403	NaN	2.0779	2.8012	3.2749	NaN	NaN
Q9V3G1	Q9V3G1	60S ribosomal protein L8	RpL8	sp|Q9V3G1|RL8_DROME Large ribosomal subunit protein uL2 OS=Drosophila melanogaster OX=7227 GN=RpL8 PE=1 SV=1	178810000	193370000	37869000	189810000	220740000	35602000	129880000	156820000	34092000	100770000	83795000	29373000	51999000	64153000	20755000	9296400	13358000	4518000	23584000	46067000	46219000	28574000	53527000	50236000	27160000	44873000	45999000	1.1715	1.3084	1.236	0.64757	1.1752	1.1944	1.8433	1.9652	2.1229	0.21009	0.21762	0.21759	0.24824	0.35271	0.34771	2.0956	1.5944	2.1233
M9MRT6;P08645	M9MRT6;P08645	Ras-like protein 3	R	tr|M9MRT6|M9MRT6_DROME small monomeric GTPase OS=Drosophila melanogaster OX=7227 GN=Rap1 PE=4 SV=1;sp|P08645|RAP1_DROME Ras-related protein Rap1 OS=Drosophila melanogaster OX=7227 GN=Rap1 PE=2 SV=2	20782000	23781000	5159900	45285000	83396000	14163000	20984000	32274000	6051500	26096000	19691000	39915000	20768000	17453000	38061000	2151900	1518800	3196200	5831900	15708000	46170000	5553700	14280000	43818000	16924000	62762000	158960000	1.4052	2.0452	1.8832	0.63654	0.78365	0.64152	1.6126	2.9659	3.7188	0.252	0.34782	0.27321	1.4581	1.7191	2.0421	4.3882	9.148	8.5699
Q9VKM8;Q9VKM7	Q9VKM8;Q9VKM7		CG6089	tr|Q9VKM8|Q9VKM8_DROME RH51633p OS=Drosophila melanogaster OX=7227 GN=Tmem214 PE=1 SV=1;tr|Q9VKM7|Q9VKM7_DROME AT01533p OS=Drosophila melanogaster OX=7227 GN=Tmem214 PE=1 SV=2	192220000	128630000	29623000	137770000	89901000	11728000	24320000	21013000	4700200	9766800	8883900	2616700	100680000	88457000	28979000	2436700	2186600	775160	46470000	49646000	45468000	23838000	21937000	18532000	63660000	79847000	72919000	0.78657	0.6734	0.89045	0.79757	0.74301	0.75691	1.7739	0.82936	1.2667	0.17915	0.077603	0.20158	0.20734	0.25602	0.27822	1.3349	0.81807	1.01
M9MS06;M9PGA7;P18091-4;P18091-3;P18091;F0JAG6;P18091-2;P18091-5	M9MS06;M9PGA7;P18091-4;P18091-3;P18091;F0JAG6;P18091-2;P18091-5	Alpha-actinin, sarcomeric	Actn	tr|M9MS06|M9MS06_DROME Alpha actinin, isoform D OS=Drosophila melanogaster OX=7227 GN=Actn PE=1 SV=1;tr|M9PGA7|M9PGA7_DROME Alpha actinin, isoform G OS=Drosophila melanogaster OX=7227 GN=Actn PE=1 SV=1;sp|P18091-4|ACTN_DROME Isoform Adult muscle of Alpha-a	21975000	4387000	39078000	14595000	4124700	28914000	7049300	1773200	22808000	19558000	14639000	84478000	16659000	10336000	54892000	0	0	1679700	10705000	4262500	45464000	7184900	13040000	46418000	13929000	18458000	99257000	0.23443	0.3007	0.21176	0.29615	0.35354	NaN	0.42898	0.51034	0.66127	2.6299	2.8662	2.5697	5.0849	3.9574	NaN	5.4129	7.0408	6.2783
A0A0B4K623;O96553-2;O96553	A0A0B4K623;O96553-2;O96553	C-1-tetrahydrofolate synthase, cytoplasmic;Methylenetetrahydrofolate dehydrogenase;Methenyltetrahydrofolate cyclohydrolase;Formyltetrahydrofolate synthetase	pug	tr|A0A0B4K623|A0A0B4K623_DROME C-1-tetrahydrofolate synthase, cytoplasmic OS=Drosophila melanogaster OX=7227 GN=pug PE=1 SV=1;sp|O96553-2|C1TC_DROME Isoform A of C-1-tetrahydrofolate synthase, cytoplasmic OS=Drosophila melanogaster OX=7227 GN=pug;sp|O96553	210890000	329880000	72866000	182050000	319040000	58634000	184670000	318720000	61087000	73407000	134790000	21618000	61722000	121770000	18574000	3379800	5883900	1724400	27055000	89709000	45168000	14107000	69463000	31377000	31852000	167080000	69836000	1.5975	1.7263	1.6623	2.3732	2.2637	1.9034	5.9552	6.5009	7.7882	0.2307	0.23354	0.22258	0.29023	0.34833	0.17117	2.2482	2.2014	2.7351
Q7JZN0	Q7JZN0		Sec61beta	tr|Q7JZN0|Q7JZN0_DROME Protein transport protein Sec61 subunit beta OS=Drosophila melanogaster OX=7227 GN=Sec61beta PE=1 SV=1	122690000	182110000	17117000	111280000	146860000	29339000	100070000	148450000	32898000	52061000	76650000	14919000	33636000	45372000	7157900	7332800	10240000	1954800	22035000	69422000	44972000	19567000	86530000	53549000	15742000	59409000	48004000	1.5509	1.3323	1.3467	1.3835	1.3871	1.5138	2.7139	3.8695	3.5146	0.14565	0.13469	0.14925	0.18935	0.19124	0.48957	1.7615	2.5629	2.6343
H1UUB1;P18489-4;P18489-3;P18489-2;P18489	H1UUB1;P18489-4;P18489-3;P18489-2;P18489	Synaptobrevin	Syb-RA;Syb	tr|H1UUB1|H1UUB1_DROME GEO12465p1 OS=Drosophila melanogaster OX=7227 GN=Syb PE=1 SV=1;sp|P18489-4|SYB_DROME Isoform D of Synaptobrevin OS=Drosophila melanogaster OX=7227 GN=Syb;sp|P18489-3|SYB_DROME Isoform A of Synaptobrevin OS=Drosophila melanogaster OX=	30473000	42307000	38004000	12698000	21516000	16529000	12005000	19106000	17878000	13671000	11811000	30027000	52230000	59339000	50795000	0	0	0	7270700	36174000	44929000	8003100	42331000	29525000	7748700	34371000	45244000	1.2371	1.6583	1.4201	0.86933	1.4055	NaN	4.2014	4.9301	3.7176	1.0116	0.86186	1.4207	2.2987	0.51669	NaN	6.3532	3.5954	5.3724
Q8IPG9;M9PCW5;Q7KTJ7	Q8IPG9;M9PCW5;Q7KTJ7		Bsg	tr|Q8IPG9|Q8IPG9_DROME Basigin, isoform A OS=Drosophila melanogaster OX=7227 GN=Bsg PE=1 SV=1;tr|M9PCW5|M9PCW5_DROME Basigin, isoform J OS=Drosophila melanogaster OX=7227 GN=Bsg PE=1 SV=1;tr|Q7KTJ7|Q7KTJ7_DROME Basigin, isoform G OS=Drosophila melanogaster	12920000	24818000	6420500	6907000	11944000	2749600	10521000	21965000	4106900	22555000	14872000	38000000	27292000	19043000	45787000	1797200	1596700	4306700	7646300	13289000	44925000	6988900	13912000	40079000	7980100	13145000	38687000	1.7859	1.8461	2.0042	0.57365	0.61628	0.85924	1.8146	1.7596	2.9822	0.47546	0.37588	0.37355	1.5757	1.6114	1.8594	6.2016	5.8585	8.0659
Q7K2P3;A1Z7Z4	Q7K2P3;A1Z7Z4			tr|Q7K2P3|Q7K2P3_DROME GH20817p OS=Drosophila melanogaster OX=7227 GN=Dmel\CG1648 PE=1 SV=1;tr|A1Z7Z4|A1Z7Z4_DROME Uncharacterized protein, isoform B OS=Drosophila melanogaster OX=7227 GN=Dmel\CG1648 PE=1 SV=1	959830000	475610000	130320000	730640000	412120000	88115000	821890000	484160000	104910000	27116000	19774000	12361000	81475000	54634000	38469000	78776000	54681000	31738000	14297000	35483000	44662000	13040000	28687000	38951000	14729000	50097000	63297000	0.53078	0.57588	0.56454	0.70814	0.75242	0.65978	2.7118	2.3865	3.3968	0.12191	0.12144	0.12022	0.3793	0.40152	0.34746	3.0547	3.3019	4.2005
Q7JXC4	Q7JXC4		P32	tr|Q7JXC4|Q7JXC4_DROME CG6459 protein OS=Drosophila melanogaster OX=7227 GN=P32 PE=1 SV=1	0	0	0	17012000	11732000	4433900	12123000	11297000	4061100	19416000	4071900	23085000	15582000	4050800	22365000	4317600	2091400	10082000	9702100	7424700	44488000	8257300	6926200	29629000	21086000	12978000	58063000	NaN	0.95355	0.95725	0.24155	0.21882	0.38282	1.4447	1.8911	0.97816	NaN	0.28802	0.29527	1.2029	1.2053	1.8197	4.0117	2.8706	2.2917
Q7KSQ0	Q7KSQ0		sea	tr|Q7KSQ0|Q7KSQ0_DROME Citrate transport protein OS=Drosophila melanogaster OX=7227 GN=sea PE=1 SV=1	291830000	238090000	68631000	412270000	377120000	95106000	393640000	353320000	90778000	90163000	70531000	33530000	85102000	67093000	38853000	3874800	2348700	1284500	12640000	35223000	44125000	15328000	47680000	53085000	29699000	106500000	108530000	0.89563	0.88516	0.83393	0.77662	0.75711	0.77992	2.7326	2.87	4.2894	0.20333	0.20349	0.1952	0.34049	0.42612	0.43986	3.3918	3.1902	3.7012
P54192	P54192	General odorant-binding protein 19d	Obp19d	sp|P54192|OB19D_DROME General odorant-binding protein 19d OS=Drosophila melanogaster OX=7227 GN=Obp19d PE=1 SV=2	0	0	0	0	0	0	0	0	0	56111000	60819000	11895000	38558000	59599000	12631000	32632000	41748000	7176500	18867000	94425000	43900000	7807400	36796000	18074000	4410900	27083000	12844000	NaN	NaN	NaN	0.90289	1.5318	1.2039	5.2287	5.4078	4.9095	NaN	NaN	NaN	0.22033	0.3841	0.21143	2.2833	2.2649	2.3192
Q7KT11;Q9VIJ0;Q8SZU0;Q8INU6	Q7KT11;Q9VIJ0;Q8SZU0			tr|Q7KT11|Q7KT11_DROME Uncharacterized protein, isoform B OS=Drosophila melanogaster OX=7227 GN=Dmel\CG9331 PE=1 SV=1;tr|Q9VIJ0|Q9VIJ0_DROME Uncharacterized protein, isoform A OS=Drosophila melanogaster OX=7227 GN=Dmel\CG9331 PE=1 SV=3;tr|Q8SZU0|Q8SZU0_DRO	250960000	318700000	173370000	312560000	438700000	160570000	171760000	214570000	86630000	64212000	85134000	66693000	44743000	64677000	38847000	2270000	2490500	832250	16957000	75892000	43743000	10992000	55382000	44084000	20879000	55225000	35472000	1.2051	1.2554	1.2203	1.2238	1.4386	1.2446	4.4724	4.8742	3.8471	0.25444	0.19804	0.27446	0.48797	0.42421	0.44499	2.466	2.9324	1.7505
Q59E09;Q9VP61;Q9VP61-2	Q59E09;Q9VP61;Q9VP61-2	Acetyl-coenzyme A synthetase	AcCoAS	tr|Q59E09|Q59E09_DROME Acetyl-coenzyme A synthetase OS=Drosophila melanogaster OX=7227 GN=AcCoAS PE=1 SV=2;sp|Q9VP61|ACSA_DROME Acetyl-coenzyme A synthetase OS=Drosophila melanogaster OX=7227 GN=AcCoAS PE=2 SV=1;sp|Q9VP61-2|ACSA_DROME Isoform B of Acetyl-c	266300000	647860000	83036000	262020000	722170000	76853000	252710000	589500000	67489000	64672000	167840000	44018000	44838000	111290000	26040000	2257200	1824100	546100	14992000	76800000	43511000	13403000	70574000	47518000	18673000	153150000	53835000	2.2272	2.6183	2.3596	2.2297	2.5276	1.1464	7.2951	6.5787	9.2795	0.13882	0.14935	0.28733	0.34112	0.34164	0.32517	3.3463	2.7061	3.0531
A0A0B4LHF7;Q9VD51	A0A0B4LHF7;Q9VD51	Probable ATP-dependent RNA helicase pitchoune	pit	tr|A0A0B4LHF7|A0A0B4LHF7_DROME ATP-dependent RNA helicase OS=Drosophila melanogaster OX=7227 GN=pit PE=3 SV=1;sp|Q9VD51|DDX18_DROME Probable ATP-dependent RNA helicase pitchoune OS=Drosophila melanogaster OX=7227 GN=pit PE=2 SV=2	788020	1244700	66784	750110	1288600	86015	370600	1132100	123640	0	0	0	0	0	0	1018400	299550	1577500	7858200	7917700	43485000	6349800	7201000	30824000	0	0	0	1.5439	1.9391	2.3747	NaN	NaN	0.22525	0.95842	1.2396	NaN	NaN	NaN	0.27672	NaN	NaN	1.277	4.3094	4.9197	NaN
M9PD18;P48602	M9PD18;P48602	V-type proton ATPase catalytic subunit A isoform 1	Vha68-1	tr|M9PD18|M9PD18_DROME H(+)-transporting two-sector ATPase OS=Drosophila melanogaster OX=7227 GN=Vha68-1 PE=1 SV=1;sp|P48602|VATA1_DROME V-type proton ATPase catalytic subunit A isoform 1 OS=Drosophila melanogaster OX=7227 GN=Vha68-1 PE=2 SV=2	0	0	0	0	0	0	0	0	0	51510000	11954000	64336000	45822000	10296000	57874000	2896100	1022000	3350700	6056900	8702300	43179000	7812500	9003200	45827000	9288100	7378500	46018000	NaN	NaN	NaN	0.27363	0.25319	0.43854	1.287	1.1127	1.6158	NaN	NaN	NaN	1.2429	1.2258	0.89662	6.5637	6.4399	6.5321
M9PF46;Q9VT33;Q9VT32;M9PEY1;M9PEP5;M9PHW7	M9PF46;Q9VT33;Q9VT32;M9PEY1;M9PEP5;M9PHW7			tr|M9PF46|M9PF46_DROME Ribose-phosphate pyrophosphokinase 2 OS=Drosophila melanogaster OX=7227 GN=Prps PE=1 SV=1;tr|Q9VT33|Q9VT33_DROME Ribose-phosphate pyrophosphokinase 2 OS=Drosophila melanogaster OX=7227 GN=Prps PE=1 SV=3;tr|Q9VT32|Q9VT32_DROME Ribose-	187750000	241460000	84065000	180180000	265840000	82400000	146110000	219560000	77022000	77709000	113260000	53189000	33870000	49595000	21066000	972750	1551300	463880	12656000	61110000	42290000	11700000	51467000	35098000	17364000	99226000	60370000	1.2864	1.5303	1.4138	1.431	1.3727	1.6184	4.9247	6.7355	5.7463	0.22567	0.19542	0.21963	0.42301	0.47254	0.4458	2.9185	3.691	3.9618
Q8SY69	Q8SY69			tr|Q8SY69|Q8SY69_DROME MICOS complex subunit MIC10 OS=Drosophila melanogaster OX=7227 GN=RH61753p PE=2 SV=1	0	0	0	15254000	14450000	14258000	0	0	0	44883000	17538000	60479000	0	0	0	0	0	0	5114900	6683500	42086000	0	0	0	6243500	9312800	42974000	NaN	0.70465	NaN	0.43096	NaN	NaN	1.0229	NaN	1.3405	NaN	0.71645	NaN	1.4441	NaN	NaN	5.1163	NaN	6.0659
Q9W503	Q9W503			tr|Q9W503|Q9W503_DROME RH61816p OS=Drosophila melanogaster OX=7227 GN=Dmel\CG3091 PE=2 SV=1	0	0	0	12305000	4219300	16831000	8649300	2323400	12517000	0	0	0	0	0	0	3974500	782960	6179400	7734900	8273700	41995000	8308700	9294900	54558000	0	0	0	NaN	0.34722	0.3336	NaN	NaN	0.49335	0.93605	1.4041	NaN	NaN	1.0053	1.2237	NaN	NaN	1.0076	4.7249	5.2485	NaN
A4V4I0;P26308	A4V4I0;P26308	Guanine nucleotide-binding protein subunit beta-1	Gbeta13F	tr|A4V4I0|A4V4I0_DROME G protein beta-subunit 13F, isoform C OS=Drosophila melanogaster OX=7227 GN=Gbeta13F PE=1 SV=1;sp|P26308|GBB1_DROME Guanine nucleotide-binding protein subunit beta-1 OS=Drosophila melanogaster OX=7227 GN=Gbeta13F PE=1 SV=1	0	0	0	0	0	0	0	0	0	9553300	7231100	42709000	0	0	2870100	0	0	0	2638900	3100000	41909000	807290	397630	24235000	956910	1759500	45572000	NaN	NaN	NaN	0.84735	NaN	NaN	0.86323	0.56944	1.1505	NaN	NaN	NaN	3.9684	NaN	NaN	13.055	9.1516	6.5557
Q86BQ4;Q8STA5	Q86BQ4;Q8STA5			tr|Q86BQ4|Q86BQ4_DROME Histidine triad nucleotide binding protein 1, isoform B OS=Drosophila melanogaster OX=7227 GN=HINT1 PE=1 SV=1;tr|Q8STA5|Q8STA5_DROME Histidine triad nucleotide binding protein 1, isoform A OS=Drosophila melanogaster OX=7227 GN=HINT1	196190000	246210000	39962000	67193000	81566000	12072000	78464000	93453000	15758000	10011000	26918000	13015000	41915000	86945000	27720000	0	0	0	9169800	42734000	41866000	2903800	19626000	12318000	11376000	75055000	50142000	2.11	1.2303	1.2338	1.317	1.8683	NaN	4.6099	7.4512	7.0294	0.21296	0.16903	0.1981	0.7892	0.79188	NaN	3.7874	3.997	4.7672
C9QP21;P08171	C9QP21;P08171	Carboxylic ester hydrolase;Esterase-6	Est-6	tr|C9QP21|C9QP21_DROME Carboxylic ester hydrolase OS=Drosophila melanogaster OX=7227 GN=Est-6 PE=1 SV=1;sp|P08171|EST6_DROME Esterase-6 OS=Drosophila melanogaster OX=7227 GN=Est-6 PE=1 SV=2	7001800	15356000	1300000	6577900	13785000	1260300	3953800	7373500	526520	31882000	56833000	6864900	37624000	69818000	8330200	5786600	8380800	2024700	18528000	103080000	41801000	17447000	77528000	34613000	21551000	114580000	48015000	1.9444	2.3471	1.991	1.9867	1.8463	1.6583	4.7614	5.0004	6.4101	0.1377	0.27049	0.17855	0.2195	0.15886	0.28074	2.0847	1.913	2.122
A0A0B4LG36;Q06943	A0A0B4LG36;Q06943	High mobility group protein Z	HmgZ	tr|A0A0B4LG36|A0A0B4LG36_DROME HMG protein Z, isoform C OS=Drosophila melanogaster OX=7227 GN=HmgZ PE=4 SV=1;sp|Q06943|HMGZ_DROME High mobility group protein Z OS=Drosophila melanogaster OX=7227 GN=HmgZ PE=1 SV=1	20521000	11348000	4704800	52602000	56929000	21298000	68654000	59964000	23257000	32129000	16834000	26013000	41823000	14570000	35552000	57403000	25590000	69002000	2627600	12168000	41587000	7174300	13726000	68445000	0	0	0	0.66189	1.0999	1.0256	0.37064	0.33978	0.43952	6.4932	2.5264	NaN	0.22984	0.32193	0.35883	0.48851	0.8193	0.74626	18.547	7.4672	NaN
A4V4U5;M9NHG9;Q04499-2;Q04499-5;M9NFJ2;Q04499-3;Q04499;Q04499-4	A4V4U5;M9NHG9;Q04499-2;Q04499-5;M9NFJ2;Q04499-3;Q04499;Q04499-4	Proline dehydrogenase 1, mitochondrial	slgA	tr|A4V4U5|A4V4U5_DROME Proline dehydrogenase OS=Drosophila melanogaster OX=7227 GN=slgA PE=1 SV=1;tr|M9NHG9|M9NHG9_DROME Proline dehydrogenase OS=Drosophila melanogaster OX=7227 GN=slgA PE=1 SV=1;sp|Q04499-2|PROD_DROME Isoform A of Proline dehydrogenase 1,	0	0	0	0	0	0	0	0	0	32663000	11113000	87487000	41910000	14602000	105590000	482380	176480	2603900	7081900	5028100	41369000	6486100	5684600	46969000	9792800	6750000	58475000	NaN	NaN	NaN	0.23056	0.28645	0.33744	1.2889	0.85833	0.81269	NaN	NaN	NaN	2.5575	2.5654	2.7383	8.6694	14.493	9.6263
X2JCI4;E1JJD5;P13217-2;P13217	X2JCI4;E1JJD5;P13217-2;P13217	Phosphoinositide phospholipase C;1-phosphatidylinositol 4,5-bisphosphate phosphodiesterase	norpA	tr|X2JCI4|X2JCI4_DROME 1-phosphatidylinositol 4,5-bisphosphate phosphodiesterase OS=Drosophila melanogaster OX=7227 GN=norpA PE=1 SV=1;tr|E1JJD5|E1JJD5_DROME 1-phosphatidylinositol 4,5-bisphosphate phosphodiesterase OS=Drosophila melanogaster OX=7227 GN=no	0	0	0	0	0	0	0	0	0	51283000	21391000	29231000	37587000	16178000	21136000	1764500	858770	1243800	9364000	16488000	40841000	6576400	14816000	41194000	9182900	18025000	46695000	NaN	NaN	NaN	0.34832	0.35152	0.39758	1.5143	1.8658	2.3925	NaN	NaN	NaN	0.61722	0.54401	0.72661	4.4842	4.052	5.9659
A1Z9M2;A0A0B4JD51;F2FB55	A1Z9M2;A0A0B4JD51;F2FB55	Receptor expression-enhancing protein	CG8331-RB	tr|A1Z9M2|A1Z9M2_DROME Receptor expression-enhancing protein OS=Drosophila melanogaster OX=7227 GN=ReepB PE=3 SV=1;tr|A0A0B4JD51|A0A0B4JD51_DROME Receptor expression-enhancing protein OS=Drosophila melanogaster OX=7227 GN=ReepB PE=3 SV=1;tr|F2FB55|F2FB55_D	88421000	101680000	25881000	95809000	149420000	21294000	73745000	135290000	24246000	31285000	35102000	16520000	62145000	79288000	37041000	0	0	0	15609000	48870000	40591000	5409500	23919000	24570000	16403000	67903000	67141000	1.7074	1.575	1.6391	1.0442	1.2421	NaN	3.1126	4.4098	4.6887	0.28752	0.23472	0.25905	0.66804	0.64399	NaN	3.1315	4.1244	4.4525
Q9VNE9;A0A0B4KFM7	Q9VNE9	60S ribosomal protein L13a	RpL13A	sp|Q9VNE9|RL13A_DROME Large ribosomal subunit protein uL13 OS=Drosophila melanogaster OX=7227 GN=RpL13A PE=1 SV=1	116510000	134550000	27673000	158680000	296940000	43094000	119260000	121170000	36901000	48767000	47127000	28070000	29028000	30339000	13035000	2376100	2387800	1420200	21705000	39459000	40522000	26365000	66369000	62051000	20349000	42763000	49357000	1.1514	1.2437	0.98931	0.74926	0.90361	0.98801	2.297	1.9347	2.8708	0.20191	0.2257	0.17193	0.26443	0.29423	0.38273	2.302	1.7003	3.0684
Q9VZ01	Q9VZ01			tr|Q9VZ01|Q9VZ01_DROME RH44935p OS=Drosophila melanogaster OX=7227 GN=NdufV3 PE=1 SV=1	56546000	92740000	25980000	57833000	114860000	29937000	32826000	37010000	8100000	48654000	35004000	60967000	21357000	15279000	28540000	27423000	19637000	41174000	5655800	17825000	40432000	7103000	20391000	62714000	0	0	0	1.8563	1.5968	0.94354	0.50538	0.49306	0.68226	2.1411	2.4585	NaN	0.37525	0.6408	0.20575	1.083	1.0867	1.4239	4.7353	6.0551	NaN
X2JIQ5;Q9W3W8	X2JIQ5;Q9W3W8	60S ribosomal protein L17	RpL17	tr|X2JIQ5|X2JIQ5_DROME Large ribosomal subunit protein uL22 OS=Drosophila melanogaster OX=7227 GN=RpL17 PE=3 SV=1;sp|Q9W3W8|RL17_DROME Large ribosomal subunit protein uL22 OS=Drosophila melanogaster OX=7227 GN=RpL17 PE=1 SV=1	146710000	169920000	28001000	127940000	152500000	25289000	109590000	130260000	18049000	37375000	36248000	10379000	36985000	36137000	10297000	2264800	1965400	887810	10431000	33752000	40067000	10753000	49052000	41724000	10862000	47822000	45694000	1.2228	1.2261	1.2351	0.98315	1.0151	1.0841	3.0961	4.5044	4.3717	0.20691	0.18614	0.15639	0.25191	0.32883	0.6748	3.3913	3.4283	3.7889
Q9VV37	Q9VV37		CG13056-RA	tr|Q9VV37|Q9VV37_DROME GEO13385p1 OS=Drosophila melanogaster OX=7227 GN=Dmel\CG13056 PE=2 SV=2	0	0	0	0	0	0	0	0	0	0	0	54591000	0	0	53165000	0	0	9344200	0	0	39600000	0	0	34459000	0	0	49475000	NaN	NaN	NaN	NaN	NaN	NaN	NaN	NaN	NaN	NaN	NaN	NaN	NaN	NaN	NaN	NaN	NaN	NaN
P22769;Q24178	P22769	Proteasome subunit alpha type-7-1	Prosalpha4	sp|P22769|PSA71_DROME Proteasome subunit alpha type-7-1 OS=Drosophila melanogaster OX=7227 GN=Prosalpha4 PE=1 SV=2	118680000	100850000	214070000	139680000	92107000	20111000	122590000	109600000	134860000	19930000	33602000	67267000	11233000	12833000	8154600	0	0	0	10554000	17043000	39577000	5776900	9901000	14239000	5590300	11466000	15730000	0.85066	0.7291	0.89476	1.4502	1.2084	NaN	1.8941	1.9922	3.2542	0.26612	0.19142	0.22792	1.5688	0.85101	NaN	3.6784	3.2508	5.184
Q7K569	Q7K569	Glycerol-3-phosphate dehydrogenase	Gpo-1	tr|Q7K569|Q7K569_DROME Glycerol-3-phosphate dehydrogenase OS=Drosophila melanogaster OX=7227 GN=Gpo1 PE=1 SV=1	112510000	66553000	32477000	143630000	88514000	43041000	101620000	66017000	40446000	43508000	26569000	54640000	31483000	17664000	46946000	394400	217150	1876500	8535900	10251000	39566000	10705000	17442000	54388000	16348000	16637000	53869000	0.65333	0.67818	0.61144	0.38258	0.39262	0.58843	1.1943	1.2749	1.4714	0.28807	0.32225	0.31561	1.4248	1.7722	2.0437	5.3488	4.5824	5.3845
Q95TZ7;Q9VSN2;E1JI76;Q058U1;Q8IQB4;Q86BH6;Q7KUB5;E1JI73;Q86BH5;Q9VSN0;E1JI74	Q95TZ7;Q9VSN2;E1JI76;Q058U1;Q8IQB4;Q86BH6;Q7KUB5;E1JI73;Q86BH5;Q9VSN0;E1JI74		Zasp66	tr|Q95TZ7|Q95TZ7_DROME GH19182p OS=Drosophila melanogaster OX=7227 GN=Zasp66 PE=1 SV=1;tr|Q9VSN2|Q9VSN2_DROME HL08110p OS=Drosophila melanogaster OX=7227 GN=Zasp66 PE=1 SV=1;tr|E1JI76|E1JI76_DROME Z band alternatively spliced PDZ-motif protein 66, isoform	60190000	19503000	42397000	95543000	32611000	65979000	66602000	18744000	39947000	95381000	17314000	103720000	59505000	10363000	69856000	8968400	2309100	12078000	9889000	9940900	39515000	15132000	20526000	75455000	14815000	18190000	66672000	0.29051	0.29288	0.29362	0.1741	0.17775	0.15422	0.8776	0.92779	0.94652	0.83233	0.82059	0.68785	1.0805	1.0291	1.2463	3.2207	4.0519	4.0034
X2JE06;Q9VJY6	X2JE06;Q9VJY6	60S ribosomal protein L24	RpL24	tr|X2JE06|X2JE06_DROME Large ribosomal subunit protein eL24 OS=Drosophila melanogaster OX=7227 GN=RpL24 PE=1 SV=1;sp|Q9VJY6|RL24_DROME Large ribosomal subunit protein eL24 OS=Drosophila melanogaster OX=7227 GN=RpL24 PE=1 SV=1	230490000	265050000	74377000	286080000	373550000	97163000	154410000	183590000	32445000	63586000	48704000	18441000	74618000	72008000	19781000	0	0	0	12755000	33764000	39442000	8594600	47490000	49866000	11657000	59031000	64737000	1.134	1.1829	1.2851	0.88638	1.0121	NaN	3.0086	4.5512	4.7405	0.19718	0.2311	0.16562	0.26507	0.23326	NaN	3.1507	4.6926	4.27
O18332;O15971	O18332		Rab1	tr|O18332|O18332_DROME FI01544p OS=Drosophila melanogaster OX=7227 GN=Rab1 PE=1 SV=1	51696000	93766000	14489000	41686000	84595000	27093000	18992000	32411000	6981500	44860000	32970000	21270000	50039000	41503000	23174000	3878400	2375300	2171900	9188100	29091000	39204000	12967000	39148000	48540000	20654000	75258000	78575000	1.9082	2.0437	1.7347	0.75179	0.85121	0.60302	3.1207	3.1871	3.5662	0.4492	0.82639	0.44538	0.51535	0.46801	0.55785	3.4741	3.4572	3.5369
M9PH10;P46461	M9PH10;P46461	Vesicle-fusing ATPase 1	comt	tr|M9PH10|M9PH10_DROME Vesicle-fusing ATPase OS=Drosophila melanogaster OX=7227 GN=comt PE=1 SV=1;sp|P46461|NSF1_DROME Vesicle-fusing ATPase 1 OS=Drosophila melanogaster OX=7227 GN=comt PE=2 SV=1	0	0	0	0	0	0	0	0	0	38680000	12477000	54714000	43293000	11499000	56896000	1751600	418800	1844100	5686100	7239900	39186000	4409600	5467700	38971000	14810000	10403000	49145000	NaN	NaN	NaN	0.25305	0.27034	0.29491	0.97418	1.9199	1.9168	NaN	NaN	NaN	1.1041	1.1176	1.1889	7.0171	9.0297	9.8449
Q9V6U9	Q9V6U9	Probable trans-2-enoyl-CoA reductase, mitochondrial	CG16935	sp|Q9V6U9|MECR_DROME Enoyl-[acyl-carrier-protein] reductase, mitochondrial OS=Drosophila melanogaster OX=7227 GN=Mecr PE=1 SV=2	40668000	39970000	13781000	56780000	55227000	19326000	91788000	96336000	49275000	39104000	22634000	40356000	28500000	13267000	28253000	1154400	856980	1316700	5734600	16892000	39174000	5726500	16780000	39185000	6539300	23926000	45216000	0.99257	0.96017	0.96048	0.61379	0.64091	0.68923	2.4641	2.2072	3.6728	0.41615	0.30123	0.51018	0.9751	1.217	1.717	5.8187	6.4372	6.0721
Q59E23;M9PBV1;P17276;E8NH57	Q59E23;M9PBV1;P17276	Protein henna	Hn	tr|Q59E23|Q59E23_DROME phenylalanine 4-monooxygenase OS=Drosophila melanogaster OX=7227 GN=Hn PE=1 SV=1;tr|M9PBV1|M9PBV1_DROME phenylalanine 4-monooxygenase OS=Drosophila melanogaster OX=7227 GN=Hn PE=1 SV=1;sp|P17276|PH4H_DROME Protein henna OS=Drosophila	8119400	30586000	2362700	4506000	15217000	2355100	5611400	18755000	1782500	29510000	42025000	10314000	37741000	51494000	13788000	447210	943320	230260	6398100	33988000	38805000	9078700	39905000	43787000	7694700	51968000	51574000	2.5736	2.8579	2.6347	1.6966	1.587	2.254	4.7957	4.666	7.4848	0.30338	0.34634	0.3	0.40277	0.46341	0.48469	5.1195	4.2244	5.5935
Q9VZU4	Q9VZU4		ND-30	sp|Q9VZU4|NDUS3_DROME NADH dehydrogenase [ubiquinone] iron-sulfur protein 3, mitochondrial OS=Drosophila melanogaster OX=7227 GN=ND-30 PE=1 SV=1	26681000	24239000	12009000	29177000	26331000	23102000	32504000	30597000	23749000	38512000	17279000	53430000	16107000	8477700	27190000	889960	502210	1575500	6834100	10398000	38780000	9803700	18095000	51924000	10782000	19110000	61498000	0.82037	0.93305	0.93092	0.44159	0.47114	0.54228	1.4556	1.7042	1.7814	0.32963	0.67243	0.44316	1.1368	1.6359	1.228	3.7199	4.6804	5.0673
Q9VLP2	Q9VLP2			tr|Q9VLP2|Q9VLP2_DROME GEO08076p1 OS=Drosophila melanogaster OX=7227 GN=Dmel\CG7781 PE=1 SV=1	0	0	0	0	0	0	0	0	0	12157000	4080500	42132000	9818900	2225800	32854000	0	0	0	2103100	3458600	38598000	1880600	2486300	22054000	0	0	0	NaN	NaN	NaN	0.36561	0.30285	NaN	1.6308	1.6544	NaN	NaN	NaN	NaN	2.7204	3.7173	NaN	15.049	13.807	NaN
Q9VMQ9	Q9VMQ9		cl	tr|Q9VMQ9|Q9VMQ9_DROME Thioredoxin domain-containing protein 17 OS=Drosophila melanogaster OX=7227 GN=cl PE=1 SV=1	9712600	10182000	2815700	11391000	12442000	3367200	11141000	8212900	1939300	15726000	8875200	10626000	21624000	12463000	14796000	8441800	3863000	7201300	6512200	13022000	38025000	4217800	10652000	29798000	2252100	16635000	21646000	0.96548	1.048	0.72117	0.61739	0.54853	0.4548	2.6486	3.0813	3.1966	0.4626	0.24631	0.17886	0.69723	0.80326	0.75027	6.3679	6.2865	6.1884
A0A0B4LEY6;Q94518	A0A0B4LEY6;Q94518	Nascent polypeptide-associated complex subunit alpha	Nacalpha	tr|A0A0B4LEY6|A0A0B4LEY6_DROME Nascent polypeptide associated complex protein alpha subunit, isoform D OS=Drosophila melanogaster OX=7227 GN=Nacalpha PE=3 SV=1;sp|Q94518|NACA_DROME Nascent polypeptide-associated complex subunit alpha OS=Drosophila melanoga	238430000	260900000	87125000	180370000	251810000	82355000	203530000	273450000	67406000	61565000	64273000	16964000	71376000	76173000	18442000	60232000	66452000	10970000	13319000	37835000	37946000	9059600	28576000	30374000	19610000	54451000	66398000	1.2516	1.5604	1.4506	1.0831	1.2901	1.1702	3.3637	3.7437	3.4916	0.20665	0.23215	0.14893	0.24096	0.2861	0.14773	2.9119	3.1516	3.0987
Q7K3D4	Q7K3D4			tr|Q7K3D4|Q7K3D4_DROME peptidylprolyl isomerase OS=Drosophila melanogaster OX=7227 GN=zda PE=1 SV=1	18658000	19540000	8330800	30761000	31324000	10595000	29507000	29875000	10206000	16442000	8362800	33239000	14669000	8390200	30962000	4791000	1732800	9415700	6633900	10571000	37712000	6319000	12621000	42965000	0	0	0	2.4697	0.85059	2.5456	1.1537	1.2729	0.37388	1.8812	2.0986	NaN	0.34803	0.53915	0.29384	0.88517	1.4941	1.7385	5.2184	6.6238	NaN
O16158	O16158		Scp2	tr|O16158|O16158_DROME Calcium-binding protein OS=Drosophila melanogaster OX=7227 GN=Scp2 PE=1 SV=1	0	0	0	0	0	0	0	0	0	55057000	18225000	52241000	72476000	26890000	55844000	9986600	5549800	9485500	4847700	11091000	37382000	3235600	7646800	19931000	8126300	21575000	47721000	NaN	NaN	NaN	0.33734	0.43522	0.43163	2.1641	1.8527	2.5604	NaN	NaN	NaN	0.83529	0.85092	1.1115	4.6546	5.1461	5.7831
Q7KM15	Q7KM15	Transcription factor BTF3	bic	tr|Q7KM15|Q7KM15_DROME Transcription factor BTF3 OS=Drosophila melanogaster OX=7227 GN=bic PE=1 SV=1	91990000	128260000	14997000	125870000	204000000	20681000	148600000	197870000	19656000	66344000	73717000	15994000	76571000	93369000	15192000	62324000	71476000	13589000	11995000	43500000	37068000	9756000	47906000	46002000	7943400	95966000	27683000	1.4306	1.5149	1.4211	1.1899	1.4357	1.3382	3.9469	4.6008	4.3345	0.22115	0.18408	0.22232	0.19349	0.20712	0.21345	2.9974	3.2006	3.4441
P81900;P81900-5;P81900-2	P81900;P81900-5;P81900-2	cAMP-dependent protein kinase type II regulatory subunit	Pka-R2	sp|P81900|KAPR2_DROME cAMP-dependent protein kinase type II regulatory subunit OS=Drosophila melanogaster OX=7227 GN=Pka-R2 PE=1 SV=2;sp|P81900-5|KAPR2_DROME Isoform D of cAMP-dependent protein kinase type II regulatory subunit OS=Drosophila melanogaster O	0	0	0	0	0	0	0	0	0	11996000	4289700	41791000	8052100	2679800	40803000	549090	679110	1272900	4464700	3468900	36811000	4085200	8057800	27646000	16385000	8528000	57493000	NaN	NaN	NaN	0.35714	0.3141	1.6847	1.1131	6.0203	0.63125	NaN	NaN	NaN	4.4752	4.7159	3.1331	9.4215	8.3702	2.3698
Q0KHZ9;Q9VAL7;Q9I7S9;Q9VXF6	Q0KHZ9;Q9VAL7		Cnx99A	tr|Q0KHZ9|Q0KHZ9_DROME Calnexin 99A, isoform E OS=Drosophila melanogaster OX=7227 GN=Cnx99A PE=1 SV=2;tr|Q9VAL7|Q9VAL7_DROME Calnexin 99A, isoform A OS=Drosophila melanogaster OX=7227 GN=Cnx99A PE=1 SV=2	2675700	4677700	0	2049100	5081900	539180	1740500	3940200	0	34715000	11927000	21213000	48431000	10709000	29494000	721790	288830	440240	7082300	15768000	36447000	6677100	13585000	37579000	8329100	20238000	54804000	1.782	2.0161	2.4572	0.42888	0.28128	0.40303	1.9851	2.0265	2.4292	NaN	NaN	NaN	0.54067	0.64775	0.64456	5.2345	6.3134	6.4808
M9NFZ9;Q9VV43	M9NFZ9;Q9VV43	TPPP family protein CG45057	CG45057	tr|M9NFZ9|M9NFZ9_DROME Ringmaker, isoform B OS=Drosophila melanogaster OX=7227 GN=ringer PE=3 SV=1;sp|Q9VV43|TPPP_DROME Tubulin polymerization-promoting protein homolog OS=Drosophila melanogaster OX=7227 GN=ringer PE=1 SV=1	0	0	0	0	0	0	0	0	0	4125500	1532500	5621900	0	0	0	5903500	2070800	12264000	3724800	6713800	36222000	1017100	1437900	4909100	1255500	2896400	19901000	NaN	NaN	NaN	0.42149	NaN	0.31591	1.2637	1.4753	1.9193	NaN	NaN	NaN	1.6022	NaN	1.234	5.8005	5.8051	12.038
M9NEW1;P54357	M9NEW1;P54357	Myosin-2 essential light chain	Mlc-c	tr|M9NEW1|M9NEW1_DROME Myosin light chain cytoplasmic, isoform B OS=Drosophila melanogaster OX=7227 GN=Mlc-c PE=4 SV=1;sp|P54357|MLC2_DROME Myosin-2 essential light chain OS=Drosophila melanogaster OX=7227 GN=Mlc-c PE=1 SV=1	19952000	26678000	15420000	36137000	43967000	17025000	14066000	35923000	9612400	19677000	25169000	17972000	17208000	13008000	14724000	8512100	7493200	6107900	7830300	17625000	36144000	3546100	7106900	11604000	1441700	2165500	7048300	0.77502	1.0427	0.77709	0.71444	0.52745	0.92658	2.5829	2.112	1.7821	1.0165	0.40582	0.47122	0.63037	0.68566	0.82229	3.7343	3.5397	3.5836
Q9VZ71	Q9VZ71			tr|Q9VZ71|Q9VZ71_DROME RE01453p OS=Drosophila melanogaster OX=7227 GN=Dmel\CG15211 PE=2 SV=1	0	0	0	0	0	0	0	0	0	0	0	0	0	0	0	0	0	0	6209100	10019000	34637000	8597800	11449000	38155000	0	0	0	NaN	NaN	NaN	NaN	NaN	NaN	1.3453	1.5061	NaN	NaN	NaN	NaN	NaN	NaN	NaN	4.5232	4.9052	NaN
M9NE68;P02516	M9NE68;P02516	Heat shock protein 23	Hsp23	tr|M9NE68|M9NE68_DROME Heat shock protein 23, isoform B OS=Drosophila melanogaster OX=7227 GN=Hsp23 PE=3 SV=1;sp|P02516|HSP23_DROME Heat shock protein 23 OS=Drosophila melanogaster OX=7227 GN=Hsp23 PE=2 SV=2	0	0	0	0	0	0	0	0	0	0	0	18080000	0	0	21632000	0	0	3488100	0	0	34470000	0	0	28647000	0	0	42311000	NaN	NaN	NaN	NaN	NaN	NaN	NaN	NaN	NaN	NaN	NaN	NaN	NaN	NaN	NaN	NaN	NaN	NaN
Q7KW39-2;Q7KW39	Q7KW39-2;Q7KW39	Probable methylmalonate-semialdehyde dehydrogenase [acylating], mitochondrial	CG17896	sp|Q7KW39-2|MMSA_DROME Isoform A of Probable methylmalonate-semialdehyde/malonate-semialdehyde dehydrogenase [acylating], mitochondrial OS=Drosophila melanogaster OX=7227 GN=CG17896;sp|Q7KW39|MMSA_DROME Probable methylmalonate-semialdehyde/malonate-semiald	75773000	134680000	27783000	77291000	112250000	25886000	56414000	92682000	16239000	58996000	76762000	27794000	44520000	51031000	20802000	5326100	5034700	2105500	11588000	39412000	34463000	7890100	38569000	31938000	11439000	55961000	45307000	1.3869	1.351	1.4805	1.0799	1.2002	1.1431	3.2229	3.7521	5.0922	0.2903	0.28268	0.26676	0.43223	0.50778	0.3786	3.4856	2.9601	4.0253
P36951	P36951	Putative hydroxypyruvate isomerase	Gip	sp|P36951|HYI_DROME Putative hydroxypyruvate isomerase OS=Drosophila melanogaster OX=7227 GN=Gip PE=2 SV=1	154480000	175250000	52924000	166740000	269990000	57576000	171590000	255740000	59853000	86139000	115480000	34839000	55491000	80895000	21170000	1591000	1517400	400770	9977200	49061000	34364000	20258000	86205000	53025000	19639000	104150000	51672000	1.1972	1.43	1.5323	1.1857	1.2106	1.1604	4.1796	4.5304	5.158	0.27453	0.32036	0.32973	0.34628	0.32987	0.38941	3.2854	2.5392	2.8683
A4V133;A4V134;D1YSG7;D1YSG8;Q00168-4;Q00168-3;Q00168-2;Q00168;L0MNA2;L0MLP2;L0MLR4	A4V133;A4V134;D1YSG7;D1YSG8;Q00168-4;Q00168-3;Q00168-2;Q00168;L0MNA2;L0MLP2;L0MLR4	Calcium/calmodulin-dependent protein kinase type II alpha chain	CaMKII	tr|A4V133|A4V133_DROME calcium/calmodulin-dependent protein kinase OS=Drosophila melanogaster OX=7227 GN=CaMKII PE=1 SV=1;tr|A4V134|A4V134_DROME calcium/calmodulin-dependent protein kinase OS=Drosophila melanogaster OX=7227 GN=CaMKII PE=1 SV=1;tr|D1YSG7|D1	0	0	0	0	0	0	0	0	0	18112000	6828500	52726000	9206100	3253400	21362000	321750	146710	625370	9386600	9732700	34285000	8647500	3377700	40624000	5132500	4274700	46834000	NaN	NaN	NaN	0.42941	0.27615	1.2905	0.68522	1.8153	0.90803	NaN	NaN	NaN	2.7216	2.3298	1.2581	8.8658	6.75	7.3416
Q9V3Y4	Q9V3Y4		Mtch	tr|Q9V3Y4|Q9V3Y4_DROME LD43650p OS=Drosophila melanogaster OX=7227 GN=Mtch PE=1 SV=1	32905000	34887000	13836000	35310000	37678000	7229100	15729000	56880000	19886000	16496000	12488000	23131000	17891000	11267000	25767000	0	0	0	5699000	14883000	34253000	3363000	9113600	27071000	2987900	8275200	24915000	1.0739	1.1807	1.1979	0.76762	0.58484	NaN	2.6429	3.313	2.957	0.21172	0.22093	0.7617	1.1267	1.2055	NaN	4.8476	6.562	6.518
Q9V4E0;Q9VBR4	Q9V4E0		ND-49	tr|Q9V4E0|Q9V4E0_DROME Complex I-49kD OS=Drosophila melanogaster OX=7227 GN=ND-49 PE=1 SV=2	52838000	33057000	13406000	47485000	25037000	8020900	65870000	41583000	15328000	47323000	18651000	50757000	56417000	22791000	65829000	5132500	927660	2214300	29809000	10519000	34133000	50993000	24910000	59018000	67081000	49392000	125800000	0.69154	0.72407	0.78207	0.58631	0.45387	0.51558	1.8517	2.0049	1.6472	0.26881	0.30551	0.2413	1.0391	1.2535	1.2516	4.8649	6.5534	4.6803
Q9W4P5	Q9W4P5	V-type proton ATPase subunit d 1	VhaAC39-1	sp|Q9W4P5|VA0D1_DROME V-type proton ATPase subunit d 1 OS=Drosophila melanogaster OX=7227 GN=VhaAC39-1 PE=2 SV=1	0	0	0	0	0	0	0	0	0	19166000	10554000	32949000	20051000	6723300	28775000	0	0	0	7656200	9808700	33915000	2528700	3712600	15090000	3009500	8617600	27292000	NaN	NaN	NaN	0.41237	0.26773	NaN	2.243	0.97256	2.5406	NaN	NaN	NaN	1.5764	1.3055	NaN	6.6037	5.0917	9.0614
A0A0B4KHW3;Q9VA73-2;A0A0B4K6V1;Q9VA73-3;Q9VA73	A0A0B4KHW3;Q9VA73-2;A0A0B4K6V1;Q9VA73-3;Q9VA73	Calcium-binding mitochondrial carrier protein Aralar1	aralar1	tr|A0A0B4KHW3|A0A0B4KHW3_DROME Aralar1, isoform F OS=Drosophila melanogaster OX=7227 GN=aralar1 PE=1 SV=1;sp|Q9VA73-2|CMC_DROME Isoform 2 of Calcium-binding mitochondrial carrier protein Aralar1 OS=Drosophila melanogaster OX=7227 GN=aralar1;tr|A0A0B4K6V1|A	177160000	159330000	48080000	190840000	176550000	43657000	200180000	178840000	57855000	90340000	70989000	24105000	60628000	52330000	15261000	2179700	1903800	777460	19541000	42835000	33381000	17959000	42595000	31377000	25112000	60893000	47359000	0.91737	0.88509	0.86258	0.75371	0.88923	0.86944	2.7495	3.4935	3.3055	0.22365	0.20278	0.227	0.25551	0.23424	0.39117	1.9715	1.9706	2.0617
A1ZB79;A1ZB78;Q7JRI6	A1ZB79;A1ZB78;Q7JRI6			tr|A1ZB79|A1ZB79_DROME Uncharacterized protein, isoform M OS=Drosophila melanogaster OX=7227 GN=Dmel\CG5174 PE=1 SV=2;tr|A1ZB78|A1ZB78_DROME Uncharacterized protein, isoform G OS=Drosophila melanogaster OX=7227 GN=BcDNA:RH27395 PE=1 SV=1;tr|Q7JRI6|Q7JRI6_D	10712000	14668000	1719900	16387000	26142000	923910	11270000	15629000	1473000	30150000	23735000	16180000	26156000	22253000	9925400	32990000	19506000	17396000	8329100	25511000	33280000	5978100	18810000	28565000	8446000	20369000	25138000	1.1959	1.6461	1.4454	0.71485	0.84628	0.52457	2.3799	3.3851	1.908	0.10662	0.12706	0.49655	0.54351	0.34194	0.60879	2.8679	4.3456	2.522
Q7JZK1	Q7JZK1		ND-B14	tr|Q7JZK1|Q7JZK1_DROME NADH dehydrogenase [ubiquinone] 1 alpha subcomplex subunit 6 OS=Drosophila melanogaster OX=7227 GN=ND-B14 PE=1 SV=1	19395000	17181000	7132800	33407000	24369000	8528400	23171000	18279000	7262300	26376000	7116300	36424000	27411000	10497000	37748000	8554500	2829200	12868000	6301800	11035000	33130000	0	0	16826000	0	0	39572000	0.70982	0.74355	0.84733	0.29142	0.37763	0.33811	1.4233	NaN	NaN	0.37842	0.2821	0.29648	1.3695	1.2993	1.4174	4.6244	NaN	NaN
Q9VNH7;Q9Y164;Q59E07;E1JJ55;Q95T61;A0A0B4K6A1;Q8IPR0;E1JJ59;E1JJ60	Q9VNH7;Q9Y164;Q59E07;E1JJ55;Q95T61;A0A0B4K6A1		BcDNA.GH02439;BcDNA:GH02439	tr|Q9VNH7|Q9VNH7_DROME Uncharacterized protein, isoform A OS=Drosophila melanogaster OX=7227 GN=Dmel\CG2082 PE=1 SV=1;tr|Q9Y164|Q9Y164_DROME BcDNA.GH02439 OS=Drosophila melanogaster OX=7227 GN=BcDNA.GH02439 PE=1 SV=1;tr|Q59E07|Q59E07_DROME Uncharacterized	0	0	0	0	0	0	0	0	0	18474000	8392500	26850000	7978600	3461700	12007000	0	0	0	18155000	8934000	33111000	14877000	8505100	29675000	5206500	4723700	16678000	NaN	NaN	NaN	0.47088	0.58466	NaN	1.1233	0.9174	1.4233	NaN	NaN	NaN	1.1202	1.5845	NaN	3.6127	3.3729	4.9304
O18335	O18335		Rab11	tr|O18335|O18335_DROME Rab11 OS=Drosophila melanogaster OX=7227 GN=Rab11 PE=1 SV=1	12953000	25275000	4384400	27466000	50451000	5149000	21330000	36340000	3802000	27047000	17300000	18351000	25993000	21240000	20644000	2198200	1601200	1839800	4470500	14392000	33055000	2618000	13914000	26140000	6307800	30193000	44813000	1.9687	1.8402	2.1423	0.66461	0.85621	0.6025	2.6184	3.9989	4.5182	0.41755	0.19555	0.23355	0.78645	0.75697	0.82798	5.4204	7.6333	7.5516
A0A6H2EFX8;P91938-4;P91938-2;P91938-3;P91938;Q9VNT5	A0A6H2EFX8;P91938-4;P91938-2;P91938-3;P91938	Thioredoxin reductase 1, mitochondrial	Trxr-1	tr|A0A6H2EFX8|A0A6H2EFX8_DROME Thioredoxin reductase-1, isoform D OS=Drosophila melanogaster OX=7227 GN=Trxr1 PE=3 SV=1;sp|P91938-4|TRXR1_DROME Isoform D of Thioredoxin reductase 1, mitochondrial OS=Drosophila melanogaster OX=7227 GN=Trxr1;sp|P91938-2|TRXR	35652000	31875000	10070000	50594000	45751000	11319000	24002000	22618000	10437000	26862000	19497000	23060000	22703000	19599000	22140000	1026800	2456600	2515500	5724800	15063000	33036000	4159000	13373000	26399000	3711700	14116000	24247000	0.80455	0.98798	0.96872	0.64494	0.79484	1.4786	2.6597	3.7098	3.3648	0.29733	0.30956	0.41835	0.67957	0.82126	1.8334	4.5761	6.8056	7.0837
Q7K8X7	Q7K8X7		GstE9	tr|Q7K8X7|Q7K8X7_DROME Glutathione S transferase E9 OS=Drosophila melanogaster OX=7227 GN=GstE9 PE=1 SV=1	373400000	363600000	68639000	358730000	394100000	56230000	306070000	329060000	66513000	165970000	238470000	35729000	120550000	162990000	22290000	5853700	8610900	188250	13204000	69665000	32977000	13895000	94826000	58401000	22179000	154090000	66676000	0.93123	1.0429	1.0746	1.5504	1.4728	1.3611	4.7889	6.4475	6.8912	0.14784	0.12455	0.17349	0.15721	0.15885	0.14199	2.53	2.4933	2.911
Q9VL68	Q9VL68			tr|Q9VL68|Q9VL68_DROME RH73277p OS=Drosophila melanogaster OX=7227 GN=Dmel\CG4598 PE=1 SV=2	71759000	46284000	12767000	64829000	55644000	16397000	54429000	39773000	11302000	32128000	24050000	15868000	31115000	26021000	12329000	1907800	1721500	1297300	7407200	21835000	32965000	5936100	17905000	26136000	7118900	21386000	35231000	0.81831	0.86025	0.8305	0.79404	0.7814	0.88748	3.2164	2.3059	4.6245	0.19959	0.21487	0.17868	0.48087	0.48084	0.83568	4.6788	3.8834	5.2621
Q9VSL4	Q9VSL4		GstO2	tr|Q9VSL4|Q9VSL4_DROME Glutathione S transferase O2, isoform B OS=Drosophila melanogaster OX=7227 GN=GstO2 PE=1 SV=2	78861000	58624000	15913000	37499000	30782000	10594000	45308000	43671000	17410000	41219000	30231000	24975000	28055000	19333000	16131000	1292000	1033700	612550	10033000	24887000	32588000	10831000	31089000	46206000	0	0	0	0.72891	0.92737	0.8998	0.69375	0.66223	0.62038	1.6469	2.6333	NaN	0.23859	0.23314	0.29897	0.50636	0.42452	0.53475	2.8854	3.5249	NaN
Q7K511	Q7K511		EG:87B1.3	tr|Q7K511|Q7K511_DROME D-2-hydroxyglutarate dehydrogenase, mitochondrial OS=Drosophila melanogaster OX=7227 GN=D2hgdh PE=1 SV=1	293720000	408520000	59695000	227480000	369360000	46684000	245110000	349970000	45754000	64999000	92723000	17176000	54534000	83604000	16833000	1781900	2834000	298540	24527000	59519000	32438000	17413000	68616000	30125000	24163000	112870000	50654000	1.4162	1.5502	1.4443	1.5283	1.5484	1.4469	2.8917	4.1804	5.9976	0.20299	0.15684	0.18799	0.26432	0.24281	0.15367	1.415	1.9896	2.6124
Q9VG33	Q9VG33	Sulfurtransferase		tr|Q9VG33|Q9VG33_DROME Sulfurtransferase OS=Drosophila melanogaster OX=7227 GN=Dmel\CG12279 PE=1 SV=2	14642000	15655000	3431200	17355000	13618000	5453100	10293000	10154000	3314700	17014000	8354800	10571000	12720000	7285600	5743600	4380700	3608300	4293500	4562900	17188000	32275000	1131000	4741500	13307000	0	0	0	0.90303	0.90263	0.81485	0.54408	0.65677	0.81691	2.9706	3.6633	NaN	0.11558	0.3666	0.32239	0.76318	0.49766	0.7615	4.5465	7.1666	NaN
X2JCE7;Q9VX03;Q1RL06;Q8IQZ1;Q86B44	X2JCE7;Q9VX03;Q1RL06;Q8IQZ1;Q86B44	Glutathione synthetase	GS	tr|X2JCE7|X2JCE7_DROME Glutathione synthetase 1, isoform K OS=Drosophila melanogaster OX=7227 GN=Gss1 PE=1 SV=1;tr|Q9VX03|Q9VX03_DROME Glutathione synthetase 1, isoform F OS=Drosophila melanogaster OX=7227 GN=Gss1 PE=1 SV=4;tr|Q1RL06|Q1RL06_DROME Glutathio	24339000	14441000	23351000	20847000	16496000	9500000	33905000	24650000	19505000	17612000	11350000	7218900	22985000	16648000	7317600	0	0	0	12574000	40211000	32103000	0	0	0	3121500	18639000	10026000	0.59355	0.69805	0.65867	0.68475	0.78898	NaN	3.8951	NaN	4.4859	0.69115	0.42908	0.43966	0.47844	0.32562	NaN	2.7105	NaN	2.9444
M9PDQ0;M9PBI5;M9PGV6;P13395	M9PDQ0;M9PBI5;M9PGV6;P13395	Spectrin alpha chain	alpha-Spec	tr|M9PDQ0|M9PDQ0_DROME Alpha spectrin, isoform D OS=Drosophila melanogaster OX=7227 GN=alpha-Spec PE=3 SV=1;tr|M9PBI5|M9PBI5_DROME Alpha spectrin, isoform C OS=Drosophila melanogaster OX=7227 GN=alpha-Spec PE=3 SV=1;tr|M9PGV6|M9PGV6_DROME Alpha spectrin, i	5610800	5057900	5586100	5849200	5683500	4790700	5404700	5225000	3733300	12451000	6890400	33817000	13737000	10425000	33587000	2065500	1224900	3603300	10505000	9123100	31932000	3999500	5893700	31004000	5174800	8244700	45690000	0.7915	0.94596	0.79984	0.43764	0.4651	0.62145	1.8496	1.9631	1.9315	0.60827	0.68798	0.52038	2.4	2.2855	1.9386	12.099	11.206	13.38
Q7JYW9	Q7JYW9	Hexokinase	Hex-C	tr|Q7JYW9|Q7JYW9_DROME Phosphotransferase OS=Drosophila melanogaster OX=7227 GN=Hex-C PE=1 SV=1	277090000	332520000	70440000	290990000	412520000	73078000	268390000	338450000	65310000	41018000	65567000	15542000	44927000	81946000	13853000	857370	1088200	371680	12747000	56129000	31859000	11656000	48925000	24587000	15078000	71461000	31950000	1.2774	1.3642	1.2879	1.7717	1.8282	1.0453	4.5583	4.4195	3.7973	0.21294	0.21407	0.19191	0.17193	0.49953	0.61995	2.1072	1.9809	1.9868
Q9V429	Q9V429	Thioredoxin-2	Trx-2	sp|Q9V429|THIO2_DROME Thioredoxin-2 OS=Drosophila melanogaster OX=7227 GN=Trx2 PE=1 SV=3	142020000	483400000	58625000	153950000	510360000	54460000	134720000	452710000	50494000	140590000	249810000	73056000	189150000	319010000	124440000	41443000	33712000	26214000	2369100	15404000	31637000	37868000	303660000	173620000	47396000	301300000	235050000	1.0046	1.2092	1.5772	0.82698	0.81641	0.67491	6.3207	4.2832	6.1111	0.27611	0.31942	0.38635	0.64425	0.60677	0.53403	11.705	4.5914	4.2019
Q9V4N3-2;Q9V4N3	Q9V4N3-2;Q9V4N3	Cytochrome b5	Cyt-b5	sp|Q9V4N3-2|CYB5_DROME Isoform A of Cytochrome b5 OS=Drosophila melanogaster OX=7227 GN=Cyt-b5;sp|Q9V4N3|CYB5_DROME Cytochrome b5 OS=Drosophila melanogaster OX=7227 GN=Cyt-b5 PE=2 SV=1	163840000	266640000	27684000	222650000	368050000	38201000	202990000	359980000	27486000	53422000	73188000	14817000	43875000	70807000	12484000	2196900	4956700	1110000	9496200	59486000	31452000	10072000	57625000	31058000	8780900	60462000	34445000	1.6875	1.9477	1.8721	1.4933	1.6299	2.2213	6.1603	8.0027	7.9904	0.13892	0.13687	0.15101	0.24488	0.25379	0.35513	2.5078	3.2317	2.5062
Q7K2X5;D0Z756	Q7K2X5;D0Z756		CG14762-RA	tr|Q7K2X5|Q7K2X5_DROME GH01839p OS=Drosophila melanogaster OX=7227 GN=Dmel\CG14762 PE=1 SV=1;tr|D0Z756|D0Z756_DROME MIP14966p OS=Drosophila melanogaster OX=7227 GN=CG14762-RA PE=1 SV=1	1109300	3651800	580210	0	0	0	0	0	0	8214200	3089800	20162000	9824000	3165400	19731000	1139600	297080	2194900	2507200	5129000	31311000	2232200	3706600	22841000	2536800	5034200	30250000	3.4527	NaN	NaN	0.3613	0.34751	0.23704	1.8755	1.6185	2.2519	0.55764	NaN	NaN	2.0859	1.7893	1.6652	10.578	10.003	13.03
Q8IN43	Q8IN43	Protein Turandot C	TotC	sp|Q8IN43|TOTC_DROME Protein Turandot C OS=Drosophila melanogaster OX=7227 GN=TotC PE=2 SV=1	46543000	77022000	15668000	0	0	0	0	0	0	194380000	237940000	72175000	8372200	18041000	5241200	14009000	18252000	1684700	19424000	125590000	30980000	5030700	30056000	10864000	0	0	0	1.5039	NaN	NaN	1.1666	1.996	1.2238	6.5271	4.6308	NaN	0.40649	NaN	NaN	0.28526	0.34793	0.1185	1.4725	2.0223	NaN
Q9W125	Q9W125		ND-19	tr|Q9W125|Q9W125_DROME NADH dehydrogenase [ubiquinone] 1 alpha subcomplex subunit 8 OS=Drosophila melanogaster OX=7227 GN=ND-19 PE=1 SV=1	17634000	15815000	25151000	39321000	32944000	62135000	10875000	13371000	28028000	39881000	16764000	32839000	10282000	5584600	25031000	1105600	627060	4739500	58620000	8343900	30388000	89195000	7560100	35279000	64360000	8443100	32715000	0.66283	0.88784	1.0575	0.55344	0.70777	0.83793	0.21563	0.15005	0.24994	1.1374	0.22502	2.278	1.0664	1.4499	2.3119	0.80933	0.51123	0.81439
A0A0B4KGY6-9;A0A0B4KGY6-10;A0A0B4KGY6-5;A0A0B4KGY6-4;A0A0B4KGY6-7;A0A0B4KGY6-8;A0A0B4KGY6-3;A0A0B4KGY6-2;A0A0B4KGY6-12;A0A0B4KGY6-11;A0A0B4KGY6-6;A0A0B4KGY6	A0A0B4KGY6-9;A0A0B4KGY6-10;A0A0B4KGY6-5;A0A0B4KGY6-4;A0A0B4KGY6-7;A0A0B4KGY6-8;A0A0B4KGY6-3;A0A0B4KGY6-2;A0A0B4KGY6-12;A0A0B4KGY6-11;A0A0B4KGY6-6;A0A0B4KGY6		ps	sp|A0A0B4KGY6-9|NOVA_DROME Isoform B of RNA-binding protein Pasilla OS=Drosophila melanogaster OX=7227 GN=ps;sp|A0A0B4KGY6-10|NOVA_DROME Isoform Q of RNA-binding protein Pasilla OS=Drosophila melanogaster OX=7227 GN=ps;sp|A0A0B4KGY6-5|NOVA_DROME Isoform I	7641300	17074000	974570	17459000	36545000	0	13051000	30157000	1117700	13731000	10850000	11588000	14617000	11827000	12431000	1185900	1067000	949870	4778300	15391000	30065000	3110700	15772000	30109000	4647400	20963000	41525000	2.0407	2.2063	2.2401	0.88765	0.94153	0.93275	3.5056	7.3538	3.7148	0.57113	1.0235	NaN	0.77098	0.80365	0.6631	6.1478	12.413	5.7948
P52029;CON__Q3ZBD7	P52029	Glucose-6-phosphate isomerase	Pgi	sp|P52029|G6PI_DROME Glucose-6-phosphate isomerase OS=Drosophila melanogaster OX=7227 GN=Pgi PE=2 SV=2	148620000	198930000	55235000	144910000	175820000	39742000	87969000	112690000	28790000	41256000	43138000	26405000	55078000	62610000	36143000	982690	1021300	675760	16267000	25866000	30060000	12431000	37677000	46118000	21081000	69850000	79675000	1.3779	1.4605	1.3528	1.0933	1.0149	1.1478	2.9944	3.2141	4.2579	0.33684	0.29725	0.32161	0.65089	0.64969	0.73942	3.4702	3.3801	4.1254
Q9W022	Q9W022			tr|Q9W022|Q9W022_DROME GEO01508p1 OS=Drosophila melanogaster OX=7227 GN=Dmel\CG8993 PE=1 SV=1	27128000	31177000	7088400	42039000	27240000	4923300	70659000	61248000	17331000	27871000	13620000	18512000	18553000	10899000	15351000	10237000	4901100	9074400	3982600	14856000	29753000	4892500	14886000	32347000	6932100	18988000	40681000	1.0687	0.77234	0.79927	0.60128	0.48525	0.57952	2.7738	2.8768	3.3222	0.2341	0.1362	0.1888	0.75005	0.71026	0.85135	4.7597	5.3739	5.7264
Q8MT58;A0A0B4LEQ0	Q8MT58;A0A0B4LEQ0			tr|Q8MT58|Q8MT58_DROME Carnosine dipeptidase 2, isoform A OS=Drosophila melanogaster OX=7227 GN=Cndp2 PE=1 SV=1;tr|A0A0B4LEQ0|A0A0B4LEQ0_DROME Carnosine dipeptidase 2, isoform C OS=Drosophila melanogaster OX=7227 GN=Cndp2 PE=1 SV=1	16099000	10133000	6659200	24149000	16879000	8985500	28822000	20601000	15598000	24873000	11508000	16961000	11191000	5794500	7762700	683190	356610	555060	12046000	15574000	29462000	6552800	11180000	20098000	10608000	18546000	42331000	0.71566	0.92788	0.75125	0.54541	0.49685	0.59725	2.7027	1.6476	3.4481	0.37955	0.41188	0.29095	0.80997	0.58223	0.78119	5.8423	3.6631	4.9428
M9NE01;Q27889;A0A0B4K6N5;A0A0B4K6V6;P48456;Q9VQL9	M9NE01;Q27889;A0A0B4K6N5;A0A0B4K6V6;P48456	Serine/threonine-protein phosphatase;Serine/threonine-protein phosphatase 2B catalytic subunit 2;Serine/threonine-protein phosphatase 2B catalytic subunit 1	Pp2B-14D;CanA1	tr|M9NE01|M9NE01_DROME Serine/threonine-protein phosphatase OS=Drosophila melanogaster OX=7227 GN=Pp2B-14D PE=3 SV=1;sp|Q27889|PP2B2_DROME Serine/threonine-protein phosphatase 2B catalytic subunit 2 OS=Drosophila melanogaster OX=7227 GN=Pp2B-14D PE=1 SV=2;	0	0	0	0	0	0	0	0	0	21318000	8005700	32877000	18606000	7663800	28290000	0	0	0	8023400	11566000	29227000	2339000	6020300	24963000	3622000	6631900	30554000	NaN	NaN	NaN	0.35148	0.38423	NaN	1.562	1.4184	1.8825	NaN	NaN	NaN	1.3118	1.3889	NaN	3.767	5.6587	7.2376
Q59DQ0;E6EK17;E6EK15;Q9V4C7;E6EK18;Q59DP8;Q59DP9	Q59DQ0;E6EK17;E6EK15;Q9V4C7;E6EK18;Q59DP8;Q59DP9	Calcium-transporting ATPase	PMCA	tr|Q59DQ0|Q59DQ0_DROME Calcium-transporting ATPase OS=Drosophila melanogaster OX=7227 GN=PMCA PE=1 SV=3;tr|E6EK17|E6EK17_DROME Calcium-transporting ATPase OS=Drosophila melanogaster OX=7227 GN=PMCA PE=1 SV=1;tr|E6EK15|E6EK15_DROME Calcium-transporting ATPa	0	0	0	0	0	0	0	0	0	4039000	1378100	14931000	3118800	2210700	12887000	107780	14731	418550	2868900	3006500	29030000	1199300	1464100	10531000	1728700	1606400	11704000	NaN	NaN	NaN	0.36068	0.99619	0.24018	1.2171	1.1166	0.89808	NaN	NaN	NaN	3.0132	2.7242	3.1703	8.6744	7.705	5.0561
Q9VA37;Q9VA37-2	Q9VA37;Q9VA37-2		dj-1beta	sp|Q9VA37|DJ1B_DROME Protein dj-1beta OS=Drosophila melanogaster OX=7227 GN=dj-1beta PE=1 SV=3;sp|Q9VA37-2|DJ1B_DROME Isoform 2 of Protein dj-1beta OS=Drosophila melanogaster OX=7227 GN=dj-1beta	59503000	32203000	61669000	73551000	54447000	39187000	53088000	48273000	27734000	24449000	15337000	18507000	12834000	5683400	6941300	9098600	6636500	15298000	4604500	3867700	28878000	10204000	11956000	70552000	0	0	0	0.63517	0.98758	0.92278	0.6241	0.57097	0.71237	0.95005	1.0083	NaN	0.70205	0.46333	0.45215	0.58785	0.67228	0.98455	6.1917	7.3875	NaN
Q9U915	Q9U915	Adenylate kinase	Adk2	sp|Q9U915|KAD2_DROME Adenylate kinase OS=Drosophila melanogaster OX=7227 GN=Adk2 PE=1 SV=1	49505000	53906000	16655000	92489000	97817000	31052000	88500000	100010000	36364000	24026000	19143000	19878000	17283000	12857000	17865000	4395200	3232100	3768200	7383000	13156000	28807000	7162000	18859000	32676000	12010000	29057000	49764000	1.1208	1.1025	0.95135	0.68549	0.78099	0.83324	2.563	2.0798	2.1708	0.33225	0.3015	0.32125	0.79113	0.85798	0.75446	3.2613	3.1491	4.0066
Q9VA18	Q9VA18		l(3)03670	tr|Q9VA18|Q9VA18_DROME Coiled-coil-helix-coiled-coil-helix domain containing 3 OS=Drosophila melanogaster OX=7227 GN=Chchd3 PE=1 SV=1	17796000	13260000	4233400	22804000	19291000	6130000	20954000	13189000	5468200	3973000	1612800	5129300	3129700	3104900	9173500	0	0	528630	4487800	11784000	28393000	3786300	9373800	26574000	2395200	3478900	16680000	0.83074	0.93661	0.80936	0.40658	0.66698	NaN	2.7317	2.0926	1.2504	0.25683	0.36605	0.29668	0.69782	1.657	NaN	7.7454	5.5833	5.8785
M9PFX7;Q8MYU6;Q9VW17	M9PFX7;Q8MYU6;Q9VW17		CG9368-RA	tr|M9PFX7|M9PFX7_DROME Uncharacterized protein, isoform D OS=Drosophila melanogaster OX=7227 GN=BcDNA:RH51268 PE=4 SV=1;tr|Q8MYU6|Q8MYU6_DROME RH51268p OS=Drosophila melanogaster OX=7227 GN=Dmel\CG9368 PE=2 SV=1;tr|Q9VW17|Q9VW17_DROME RE58036p OS=Drosophil	0	0	0	0	0	0	0	0	0	0	0	0	0	0	0	2258800	529330	3385900	1624200	2661500	28341000	1545800	2687200	20770000	0	0	23862000	NaN	NaN	NaN	NaN	NaN	0.28809	2.1875	1.2032	NaN	NaN	NaN	NaN	NaN	NaN	1.2845	13.917	8.1671	NaN
P13677;P05130-2;A0A0B4KFT3	P13677	Protein kinase C, eye isozyme	inaC	sp|P13677|KPC2_DROME Protein kinase C, eye isozyme OS=Drosophila melanogaster OX=7227 GN=inaC PE=1 SV=1	0	0	0	0	0	0	0	0	0	31060000	14841000	48527000	22607000	11269000	64636000	1313800	903000	475680	6309000	11117000	28251000	6139100	12420000	28858000	8772400	20798000	47354000	NaN	NaN	NaN	0.38419	0.42353	0.51373	2.014	2.128	2.6977	NaN	NaN	NaN	0.32543	0.36102	0.34962	3.0388	4.6051	4.6516
Q7K2W6	Q7K2W6		PPO1	tr|Q7K2W6|Q7K2W6_DROME GH04080p OS=Drosophila melanogaster OX=7227 GN=PPO1 PE=1 SV=1	68077000	19826000	51299000	60801000	22637000	44774000	32135000	10434000	26401000	27759000	7727500	10383000	77969000	26952000	37102000	1058800	325010	389000	5561200	27544000	27897000	6064300	37558000	34046000	11877000	44243000	38387000	0.3587	0.33332	0.3198	0.27353	0.30398	0.35654	4.8981	6.2291	3.4481	0.79803	0.72309	0.76428	0.36698	0.41874	0.37526	4.4319	6.0346	3.2009
X2J516;P00967;Q59DZ6;P00967-2	X2J516;P00967	Trifunctional purine biosynthetic protein adenosine-3;Phosphoribosylamine--glycine ligase;Phosphoribosylformylglycinamidine cyclo-ligase;Phosphoribosylglycinamide formyltransferase	ade3	tr|X2J516|X2J516_DROME Trifunctional purine biosynthetic protein adenosine-3 OS=Drosophila melanogaster OX=7227 GN=Gart PE=1 SV=1;sp|P00967|PUR2_DROME Trifunctional purine biosynthetic protein adenosine-3 OS=Drosophila melanogaster OX=7227 GN=Gart PE=1 SV=	58056000	96139000	14839000	68900000	130290000	17440000	54264000	99776000	15960000	22071000	51291000	8675100	19287000	47576000	4467700	525920	1420500	107120	12658000	39967000	27854000	6752600	28841000	10679000	18397000	68350000	24898000	1.8894	2.0229	1.8717	2.5652	2.7793	2.4212	5.3175	6.332	10.225	0.17361	0.1369	0.16822	0.26192	0.28489	0.34284	2.5595	1.8205	2.6855
A0A0B4LFD2;P29845	A0A0B4LFD2;P29845	Heat shock 70 kDa protein cognate 5	Hsc70-5	tr|A0A0B4LFD2|A0A0B4LFD2_DROME Heat shock protein cognate 5, isoform B OS=Drosophila melanogaster OX=7227 GN=Hsc70-5 PE=3 SV=1;sp|P29845|HSP7E_DROME Heat shock 70 kDa protein cognate 5 OS=Drosophila melanogaster OX=7227 GN=Hsc70-5 PE=1 SV=2	41057000	70579000	13362000	56835000	86273000	19697000	37280000	56041000	7410800	40861000	45433000	20688000	31182000	29211000	16231000	1077900	1037500	827450	8395500	28669000	27780000	15950000	32521000	35240000	20304000	40596000	38374000	1.6539	1.6472	1.4662	1.1898	1.051	1.2147	3.7645	3.2473	3.2944	0.1609	0.21427	0.17906	0.45911	0.37289	0.61227	3.5991	2.7997	3.2208
Q9I7M3;Q8INW5;Q9VIW5	Q9I7M3;Q8INW5;Q9VIW5		CG10237-RC	tr|Q9I7M3|Q9I7M3_DROME Uncharacterized protein, isoform A OS=Drosophila melanogaster OX=7227 GN=Dmel\CG10237 PE=1 SV=1;tr|Q8INW5|Q8INW5_DROME MIP27352p OS=Drosophila melanogaster OX=7227 GN=Dmel\CG10237 PE=1 SV=1;tr|Q9VIW5|Q9VIW5_DROME LD41874p OS=Drosophi	9689200	19207000	1180200	3868300	5258800	561620	8040300	14787000	1174600	33211000	45536000	6842800	40848000	65125000	7746200	3185100	3113400	398340	12046000	49931000	27743000	11136000	42820000	25129000	9725400	35737000	25055000	1.6958	1.2322	1.4856	1.1448	1.1843	1.2309	4.4408	3.5874	3.8922	0.26232	0.12207	0.35093	0.15175	0.10643	0.17126	2.7873	1.6164	2.5022
C0MJA0;Q05783	C0MJA0;Q05783	High mobility group protein D	HmgD	tr|C0MJA0|C0MJA0_DROME CG17950-PA OS=Drosophila melanogaster OX=7227 GN=HmgD PE=1 SV=1;sp|Q05783|HMGD_DROME High mobility group protein D OS=Drosophila melanogaster OX=7227 GN=HmgD PE=1 SV=1	0	0	0	0	0	0	0	0	0	2602900	2769200	26150000	0	0	0	5438600	2936600	22189000	1185000	2763400	27537000	0	0	0	0	0	0	NaN	NaN	NaN	NaN	NaN	0.84523	1.3116	NaN	NaN	NaN	NaN	NaN	8.044	NaN	2.0003	11.67	NaN	NaN
Q8SZN1;A0A0B4KHI6	Q8SZN1;A0A0B4KHI6			tr|Q8SZN1|Q8SZN1_DROME GEO08217p1 OS=Drosophila melanogaster OX=7227 GN=Dmel\CG31313 PE=1 SV=1;tr|A0A0B4KHI6|A0A0B4KHI6_DROME Uncharacterized protein, isoform C OS=Drosophila melanogaster OX=7227 GN=BcDNA:RH02566 PE=1 SV=1	28201000	51070000	3894800	33438000	50047000	8804800	62667000	85136000	15381000	13739000	28667000	3825900	12650000	36919000	30761000	38524000	82963000	9491200	8688400	55156000	27512000	5646200	34432000	13338000	0	0	0	1.3948	1.5233	1.448	1.8871	2.619	2.1076	6.1554	5.7831	NaN	0.20345	1.1854	0.18913	0.22772	2.331	0.20694	2.2164	2.8934	NaN
A0A0B4LGD3;Q8MKK5;Q9W1G5;Q9W1G6;A0A0B4LHE0;Q8MLQ5	A0A0B4LGD3;Q8MKK5;Q9W1G5;Q9W1G6;A0A0B4LHE0;Q8MLQ5		kcc	tr|A0A0B4LGD3|A0A0B4LGD3_DROME Kazachoc, isoform G OS=Drosophila melanogaster OX=7227 GN=kcc PE=1 SV=1;tr|Q8MKK5|Q8MKK5_DROME GH09271p OS=Drosophila melanogaster OX=7227 GN=kcc PE=1 SV=1;tr|Q9W1G5|Q9W1G5_DROME Kazachoc, isoform C OS=Drosophila melanogaster	0	0	0	0	0	0	0	0	0	24166000	40290000	56218000	10070000	2241900	53374000	163550	35690	1192200	7106000	2048800	27462000	6094500	4164300	47818000	11092000	8561400	51657000	NaN	NaN	NaN	0.21975	0.26972	0.2599	0.73631	1.0035	1.1488	NaN	NaN	NaN	3.6075	3.7912	3.2818	8.9842	12.567	9.8838
Q95083	Q95083	Proteasome subunit alpha type-5	Prosalpha5	sp|Q95083|PSA5_DROME Proteasome subunit alpha type-5 OS=Drosophila melanogaster OX=7227 GN=Prosalpha5 PE=2 SV=2	265780000	193380000	45578000	163890000	141660000	43262000	108340000	72373000	22467000	47491000	37182000	28323000	11122000	8913500	7418400	0	0	0	6796700	12435000	27106000	8525500	18076000	30831000	3705800	13354000	19773000	0.73168	0.74437	0.73603	0.74832	0.83772	NaN	2.0256	2.0639	2.8721	0.22537	0.32226	0.2017	0.61107	0.64579	NaN	3.2207	3.3418	3.9319
Q9VRZ1;Q967S0;A0A0B4K6L4;Q27601	Q9VRZ1;Q967S0	Amidophosphoribosyltransferase	Prat2	tr|Q9VRZ1|Q9VRZ1_DROME Amidophosphoribosyltransferase OS=Drosophila melanogaster OX=7227 GN=Prat2 PE=3 SV=2;tr|Q967S0|Q967S0_DROME Amidophosphoribosyltransferase OS=Drosophila melanogaster OX=7227 GN=Prat2 PE=2 SV=1	79839000	182260000	15502000	87538000	190860000	53346000	98217000	171450000	52533000	27945000	86036000	7772400	21885000	74270000	4468700	1298000	3877000	404140	13317000	94944000	27082000	13776000	87856000	24863000	26725000	184530000	51614000	2.0498	2.3421	2.3793	2.342	3.8486	2.785	6.4032	4.5576	5.4035	0.24867	0.2222	0.30957	0.25638	0.21999	0.34343	1.8729	1.5491	1.9295
Q9VBP6	Q9VBP6		Ssadh	tr|Q9VBP6|Q9VBP6_DROME Succinate-semialdehyde dehydrogenase OS=Drosophila melanogaster OX=7227 GN=Ssadh PE=1 SV=1	0	0	0	1567200	2719800	1535600	0	0	0	36988000	16102000	38826000	42643000	13788000	45490000	767440	225650	803850	3487100	5849900	26963000	10397000	10129000	21396000	6982600	10693000	98538000	NaN	1.9959	NaN	0.42456	0.28996	0.25081	2.0608	0.60497	1.6167	NaN	0.98798	NaN	0.9109	1.1432	1.0731	5.2224	1.2864	5.1097
Q6NN28	Q6NN28		Tm1	tr|Q6NN28|Q6NN28_DROME RE21974p OS=Drosophila melanogaster OX=7227 GN=Tm1 PE=1 SV=1	0	0	0	3957200	1863000	30675000	0	0	0	0	0	7435900	1783100	473980	7798600	7295900	2468300	27116000	4382800	2134600	26956000	1756200	3885100	15606000	811250	911230	9612600	NaN	0.31606	NaN	NaN	0.20706	0.31221	0.91956	1.5813	1.1309	NaN	3.4166	NaN	NaN	4.4441	3.5338	7.7422	8.2754	10.473
Q9VYX8	Q9VYX8			tr|Q9VYX8|Q9VYX8_DROME LD04844p OS=Drosophila melanogaster OX=7227 GN=Dmel\CG1572 PE=1 SV=1	0	0	0	0	0	0	0	0	0	10725000	8546800	11815000	10287000	7123100	7392200	0	0	0	2751400	4929900	26560000	4034700	3921600	24133000	0	0	21806000	NaN	NaN	NaN	0.74389	0.55859	NaN	2.0239	0.43971	NaN	NaN	NaN	NaN	0.71414	0.70745	NaN	3.8047	1.3841	NaN
E1JHY0;Q9I7R1;Q0E8F4;Q4LDP7;Q0E8F5;X2JGK6	E1JHY0;Q9I7R1;Q0E8F4;Q4LDP7;Q0E8F5;X2JGK6	NADH-cytochrome b5 reductase	zetaCOP;CG5946-RB	tr|E1JHY0|E1JHY0_DROME NADH-cytochrome b5 reductase OS=Drosophila melanogaster OX=7227 GN=Dmel\CG5946 PE=1 SV=1;tr|Q9I7R1|Q9I7R1_DROME NADH-cytochrome b5 reductase OS=Drosophila melanogaster OX=7227 GN=Dmel\CG5946 PE=1 SV=2;tr|Q0E8F4|Q0E8F4_DROME NADH-cyto	43064000	77813000	14214000	31427000	55385000	7353700	50628000	88260000	17370000	44602000	64342000	27505000	23650000	33388000	16781000	2438500	2759600	1313900	7007800	29975000	26368000	6859200	31913000	26368000	18328000	83706000	71423000	2.0951	2.2723	1.8656	1.3445	1.4635	1.0435	4.1794	6.0422	5.1146	0.41472	0.16929	0.16667	0.63869	0.61125	0.5489	4.1252	4.4952	4.9345
Q5U126	Q5U126			tr|Q5U126|Q5U126_DROME GEO11286p1 OS=Drosophila melanogaster OX=7227 GN=CG7072 PE=2 SV=1	0	0	0	0	0	0	0	0	0	0	0	0	0	0	0	0	0	9556500	38995000	2514700	26231000	0	0	0	0	0	0	NaN	NaN	NaN	NaN	NaN	NaN	0.049742	NaN	NaN	NaN	NaN	NaN	NaN	NaN	NaN	0.58387	NaN	NaN
M9PDK5;Q9V3J1-3;Q9V3J1;Q9V3J1-2	M9PDK5;Q9V3J1-3;Q9V3J1;Q9V3J1-2	V-type proton ATPase subunit H	VhaSFD	tr|M9PDK5|M9PDK5_DROME V-type proton ATPase subunit H OS=Drosophila melanogaster OX=7227 GN=VhaSFD PE=3 SV=1;sp|Q9V3J1-3|VATH_DROME Isoform D of V-type proton ATPase subunit H OS=Drosophila melanogaster OX=7227 GN=VhaSFD;sp|Q9V3J1|VATH_DROME V-type proton	4906700	4502900	0	3565300	3425500	258890	6115700	9387300	1197400	51361000	17698000	21833000	50803000	19052000	25573000	545050	166990	329570	28969000	14600000	26198000	24866000	15297000	31367000	30843000	22690000	37289000	0.87434	1.0227	1.1493	0.49222	0.39465	0.38108	0.45471	1.2627	0.61238	NaN	NaN	0.24037	0.50313	0.6558	0.57342	0.67374	2.3276	0.87814
Q9W3K9	Q9W3K9			tr|Q9W3K9|Q9W3K9_DROME NADP-retinol dehydrogenase OS=Drosophila melanogaster OX=7227 GN=Ldsdh1 PE=1 SV=1	106760000	92706000	18746000	145560000	112110000	28755000	96447000	79365000	17666000	108990000	93536000	22715000	73897000	76414000	16941000	826240	1100200	351960	14437000	55013000	25687000	9867100	47312000	18295000	12189000	42642000	17392000	0.85198	0.79812	0.76329	0.87047	1.0825	1.4446	4.5388	4.3521	5.1869	0.13778	0.17951	0.15963	0.1834	0.17806	0.41222	1.8579	1.8056	1.9758
Q23983	Q23983	Soluble NSF attachment protein	Snap	sp|Q23983|SNAP_DROME Alpha-soluble NSF attachment protein OS=Drosophila melanogaster OX=7227 GN=alphaSnap PE=1 SV=1	0	0	0	18122000	8187100	2846400	0	0	0	16793000	5372700	14600000	43686000	31776000	24423000	0	0	0	26454000	12162000	25570000	42943000	82996000	36213000	50562000	37911000	40188000	NaN	0.3775	NaN	0.38552	0.39895	NaN	0.68624	1.2824	0.42207	NaN	0.24938	NaN	0.88563	0.686	NaN	1.6971	2.9511	3.7223
A0A0B4K6D2;Q9VH95	A0A0B4K6D2;Q9VH95	Uncharacterized protein CG16817	CG16817	tr|A0A0B4K6D2|A0A0B4K6D2_DROME p23, isoform B OS=Drosophila melanogaster OX=7227 GN=cPges PE=1 SV=1;sp|Q9VH95|TEBPH_DROME Prostaglandin E synthase 3 homolog OS=Drosophila melanogaster OX=7227 GN=p23 PE=1 SV=1	43294000	47827000	7847900	46963000	83330000	12726000	48744000	35617000	2788900	0	0	0	0	0	0	3162600	2879600	2241600	5577600	31389000	25437000	2604400	3564700	9451100	0	0	0	1.2603	1.2273	0.82935	NaN	NaN	1.0866	3.9461	1.5237	NaN	0.16479	0.21719	0.16657	NaN	NaN	1.0008	3.6849	4.1232	NaN
Q9VGZ3	Q9VGZ3	Aconitate hydratase	Irp-1B	tr|Q9VGZ3|Q9VGZ3_DROME Iron regulatory protein 1B OS=Drosophila melanogaster OX=7227 GN=Irp-1B PE=1 SV=1	613640000	819850000	145270000	607110000	858120000	141270000	528430000	652180000	111730000	82423000	113830000	38753000	67592000	92888000	37232000	3104100	3996500	551290	8139500	34644000	25409000	11936000	59304000	44595000	14932000	79251000	60394000	1.2995	1.2852	1.2099	1.364	1.328	1.3609	4.3565	5.0855	5.8171	0.19994	0.16548	0.19515	0.16523	0.22014	0.22559	2.9515	3.4581	3.6101
P14318	P14318	Muscle-specific protein 20	Mp20	sp|P14318|MP20_DROME Muscle-specific protein 20 OS=Drosophila melanogaster OX=7227 GN=Mp20 PE=2 SV=2	402300000	209850000	158480000	377030000	174870000	174580000	335860000	143090000	158860000	19550000	5780500	9197700	35723000	12932000	16445000	9448300	2584000	4519100	6481000	11553000	25206000	7342000	26533000	37801000	20355000	36744000	69594000	0.42558	0.4328	0.43494	0.36245	0.43079	0.37895	1.7316	1.7288	2.2158	0.35118	0.37099	0.30952	0.47534	0.47122	0.54953	3.5367	3.9131	3.2238
M9ND27;Q9VMR8	M9ND27;Q9VMR8	Protein Turandot M	TotM	tr|M9ND27|M9ND27_DROME Turandot M, isoform B OS=Drosophila melanogaster OX=7227 GN=TotM PE=1 SV=1;sp|Q9VMR8|TOTM_DROME Protein Turandot M OS=Drosophila melanogaster OX=7227 GN=TotM PE=2 SV=2	1488500	4953500	986540	337720	5183500	1365900	0	0	0	1747800	6528600	1487500	0	0	0	0	0	0	69535000	83142000	25167000	0	0	0	0	0	0	2.9327	12.845	NaN	2.7532	NaN	NaN	3.7279	NaN	NaN	0.66147	3.3594	NaN	0.79854	NaN	NaN	0.95761	NaN	NaN
M9ND19;Q9W0P5	M9ND19;Q9W0P5	UDP-glucose 4-epimerase	Gale	tr|M9ND19|M9ND19_DROME UDP-glucose 4-epimerase OS=Drosophila melanogaster OX=7227 GN=Gale PE=1 SV=1;sp|Q9W0P5|GALE_DROME UDP-glucose 4-epimerase OS=Drosophila melanogaster OX=7227 GN=Gale PE=1 SV=1	94674000	105860000	50677000	109470000	133030000	40025000	92174000	85748000	63567000	21327000	17620000	14445000	8892000	9532700	3986300	0	0	0	6374100	22900000	24730000	1805200	6389100	4744200	16661000	25018000	22608000	1.1226	1.2568	1.0124	1.011	1.3987	NaN	3.3686	3.0563	1.5512	0.31078	0.30681	0.36445	0.92361	0.42003	NaN	2.9502	2.0569	1.9596
E1JI22;Q9VWA1	E1JI22;Q9VWA1	Clathrin light chain	Clc	tr|E1JI22|E1JI22_DROME Clathrin light chain OS=Drosophila melanogaster OX=7227 GN=Clc PE=1 SV=1;sp|Q9VWA1|CLC_DROME Clathrin light chain OS=Drosophila melanogaster OX=7227 GN=Clc PE=1 SV=1	35762000	58973000	47393000	35409000	56839000	35149000	38671000	71792000	28489000	42283000	40455000	32833000	21505000	23132000	13543000	38321000	27002000	26863000	8687100	21215000	24547000	4330100	19062000	28112000	7181400	19902000	32025000	1.3556	1.2944	1.477	0.9282	1.0631	0.97041	2.576	3.0783	2.4712	3.3727	0.70305	0.5548	0.87423	1.2396	0.73489	3.2563	3.217	2.5648
M9PEL1;Q07327	M9PEL1;Q07327	Protein ROP	Rop	tr|M9PEL1|M9PEL1_DROME Ras opposite, isoform B OS=Drosophila melanogaster OX=7227 GN=Rop PE=3 SV=1;sp|Q07327|ROP_DROME Protein ROP OS=Drosophila melanogaster OX=7227 GN=Rop PE=2 SV=2	0	0	0	0	0	0	0	0	0	10634000	3357400	16897000	8176100	2766000	11360000	179530	34843	299550	3578000	4793600	23948000	1395200	2650600	14660000	4913200	5592500	25680000	NaN	NaN	NaN	0.33507	0.36305	0.51464	1.2853	1.6466	1.3412	NaN	NaN	NaN	1.4903	1.2316	1.8596	5.0367	8.6561	5.0054
Q9VPE2	Q9VPE2		ND-39	tr|Q9VPE2|Q9VPE2_DROME NADH dehydrogenase [ubiquinone] 1 alpha subcomplex subunit 9, mitochondrial OS=Drosophila melanogaster OX=7227 GN=ND-39 PE=1 SV=1	18054000	13484000	5331600	24358000	14565000	8651100	17196000	13636000	5882000	32558000	15595000	34479000	15674000	5359100	22336000	1883400	1171700	2547800	4179100	6087700	23841000	4298700	8116700	27453000	5470300	9938700	37062000	0.88301	0.65101	0.82739	0.43251	0.3557	0.55162	1.6743	1.9359	1.6961	0.34121	0.53026	0.49232	1.1812	1.1671	1.1927	4.5002	4.8648	5.7693
A0A4P7VAW6;P25228	A0A4P7VAW6;P25228	Ras-related protein Rab-3	Rab3	tr|A0A4P7VAW6|A0A4P7VAW6_DROME Ras-related protein Rab-3 OS=Drosophila melanogaster OX=7227 GN=Rab3 PE=3 SV=1;sp|P25228|RAB3_DROME Ras-related protein Rab-3 OS=Drosophila melanogaster OX=7227 GN=Rab3 PE=1 SV=1	0	0	0	0	0	0	0	0	0	2091000	1924200	23916000	4933700	4394900	33923000	778380	499780	1515800	774750	1397500	23830000	0	0	17157000	0	0	19833000	NaN	NaN	NaN	0.95951	0.71023	0.78837	1.802	NaN	NaN	NaN	NaN	NaN	2.0416	2.2998	1.7633	4.0157	NaN	NaN
Q9VWV4;Q9VWV2;Q7KUW2;Q9VWV5	Q9VWV4;Q9VWV2;Q7KUW2;Q9VWV5		CG32549-RE;CG32549-RF	tr|Q9VWV4|Q9VWV4_DROME GH28326p OS=Drosophila melanogaster OX=7227 GN=Nt5b PE=1 SV=2;tr|Q9VWV2|Q9VWV2_DROME Uncharacterized protein, isoform D OS=Drosophila melanogaster OX=7227 GN=Nt5b PE=1 SV=2;tr|Q7KUW2|Q7KUW2_DROME RH50433p OS=Drosophila melanogaster O	118390000	208180000	38933000	63808000	137150000	17607000	94368000	165300000	18823000	42621000	62983000	14252000	34100000	49597000	10331000	1803400	2966300	739490	9298500	39739000	23770000	8965600	45634000	26294000	16867000	89976000	44750000	1.8587	1.9992	1.8167	1.6607	1.3493	1.5867	4.7985	4.5004	4.871	0.19984	0.21161	0.20848	0.32343	0.32238	0.42768	2.6674	2.8086	2.7174
Q9VK60	Q9VK60			tr|Q9VK60|Q9VK60_DROME GH25425p OS=Drosophila melanogaster OX=7227 GN=Dmel\CG6180 PE=1 SV=2	6243600	8340200	2016600	16605000	18089000	3595800	24823000	24496000	5813200	16628000	10316000	12774000	15017000	6658000	10626000	0	0	0	10365000	13060000	23724000	3670100	4871400	9939200	2711400	11639000	17751000	1.0495	1.2649	1.2782	0.72561	0.73175	NaN	1.1671	1.4579	2.8848	0.28052	0.23934	0.29044	0.54558	0.53925	NaN	2.353	2.4072	4.1376
D3DMF9;Q24008	D3DMF9;Q24008	Inactivation-no-after-potential D protein	inaD-RA;inaD	tr|D3DMF9|D3DMF9_DROME Inactivation no afterpotential D, isoform B OS=Drosophila melanogaster OX=7227 GN=inaD PE=1 SV=1;sp|Q24008|INAD_DROME Inactivation-no-after-potential D protein OS=Drosophila melanogaster OX=7227 GN=inaD PE=1 SV=2	0	0	0	0	0	0	0	0	0	19513000	4074600	12896000	16988000	4312100	11772000	285730	88817	210650	7889100	7070200	23538000	4466700	7104000	16587000	5464300	13938000	41017000	NaN	NaN	NaN	0.21364	0.2443	0.25824	1.4755	1.9012	1.9249	NaN	NaN	NaN	0.56036	0.60423	0.90737	5.0969	3.9133	5.5183
Q95RA9	Q95RA9		GILT1	sp|Q95RA9|GILT1_DROME GILT-like protein 1 OS=Drosophila melanogaster OX=7227 GN=GILT1 PE=1 SV=1	24686000	36645000	9033300	15713000	18100000	6355800	11828000	20750000	4479000	17054000	15818000	8721000	23867000	25571000	23717000	1939100	1615400	857570	8211300	28523000	23332000	2914100	12272000	15106000	0	0	0	1.6778	1.168	1.7313	0.94614	1.0645	1.062	4.3613	4.8363	NaN	0.29799	0.30795	0.33044	0.49134	0.71699	0.47855	3.28	4.9691	NaN
M9NE89;P08928	M9NE89;P08928	Lamin Dm0	Lam	tr|M9NE89|M9NE89_DROME Lamin, isoform B OS=Drosophila melanogaster OX=7227 GN=Lam PE=3 SV=1;sp|P08928|LAM0_DROME Lamin Dm0 OS=Drosophila melanogaster OX=7227 GN=Lam PE=1 SV=4	0	0	0	0	0	0	0	0	0	3950500	4128200	8843200	4001000	6150500	13710000	0	0	0	13943000	5808700	22986000	4530700	5733300	24486000	10448000	2073700	27740000	NaN	NaN	NaN	0.44915	0.54184	NaN	1.1246	1.3576	0.85329	NaN	NaN	NaN	3.3676	2.5371	NaN	4.9225	4.0154	4.7248
Q9VBR6	Q9VBR6		tobi	tr|Q9VBR6|Q9VBR6_DROME RE74917p OS=Drosophila melanogaster OX=7227 GN=tobi PE=2 SV=1	14751000	73447000	9519000	14347000	110670000	3302200	22405000	140640000	13193000	5717300	26321000	18858000	11408000	62774000	28429000	1140600	3395200	506960	5921700	61323000	22683000	4699200	43004000	8485100	8771500	84262000	38840000	5.0177	7.7782	6.7541	4.3275	4.5641	4.7312	9.7995	5.634	8.1745	0.25244	0.21295	0.4013	0.84825	1.4615	0.50214	2.3404	1.3742	2.2694
Q9VZ24	Q9VZ24			tr|Q9VZ24|Q9VZ24_DROME GEO11412p1 OS=Drosophila melanogaster OX=7227 GN=Dmel\CG15201 PE=2 SV=1	0	0	0	0	0	0	0	0	0	38962000	34502000	5424600	30150000	29816000	7097200	102460000	111280000	42695000	8419000	41627000	22683000	7303300	35725000	29258000	7077700	44329000	27254000	NaN	NaN	NaN	0.97554	1.0995	1.1431	4.7928	5.1567	5.6664	NaN	NaN	NaN	0.13824	0.3098	0.63655	2.7439	3.1137	3.6082
M9PF16;Q00963;M9PHG4	M9PF16;Q00963;M9PHG4	Spectrin beta chain	beta-Spec	tr|M9PF16|M9PF16_DROME Spectrin beta chain OS=Drosophila melanogaster OX=7227 GN=beta-Spec PE=3 SV=1;sp|Q00963|SPTCB_DROME Spectrin beta chain OS=Drosophila melanogaster OX=7227 GN=beta-Spec PE=1 SV=2;tr|M9PHG4|M9PHG4_DROME Spectrin beta chain OS=Drosophil	1503400	1009100	800680	2013000	1504400	1166000	1423400	972980	520700	11941000	6206400	25499000	10070000	3629200	18064000	571930	275480	1526500	3620400	5288800	22627000	3211500	6335700	20937000	5518300	8670300	25711000	0.73231	0.77377	0.78686	0.35776	0.4724	0.56601	1.877	1.813	2.2747	0.59234	0.48688	0.45271	2.22	2.2645	2.4278	8.3134	8.6286	11.101
Q9VXI1	Q9VXI1			tr|Q9VXI1|Q9VXI1_DROME L-gulonate 3-dehydrogenase OS=Drosophila melanogaster OX=7227 GN=Had1 PE=1 SV=2	165700000	234530000	95878000	103250000	208740000	56530000	93065000	157830000	61898000	13257000	19008000	2439500	10758000	18304000	1955600	677290	1042500	362080	7220800	31860000	22373000	2919000	31436000	19773000	8395300	69656000	35115000	1.9428	2.1748	1.9913	1.6288	1.9536	1.4834	6.1278	3.5474	5.2432	0.54447	0.51812	0.59199	0.21262	0.22972	0.51696	2.7154	2.6188	3.3994
Q9VN21	Q9VN21		lost	tr|Q9VN21|Q9VN21_DROME LD30155p OS=Drosophila melanogaster OX=7227 GN=lost PE=1 SV=1	25111000	25426000	21805000	58299000	66884000	22325000	46000000	49723000	19463000	32852000	35488000	15972000	20328000	27840000	11575000	1178100	1163900	459210	6053700	19486000	22288000	6270800	16371000	17522000	7714000	26993000	28249000	1.1585	1.1973	1.0958	1.0854	0.92991	1.1562	3.4882	3.3368	3.4485	0.3717	0.19941	0.13005	0.46081	0.39286	0.48374	3.5712	3.0142	3.315
Q59E30;Q95RI5;M9PFH6;M9PFW1;Q59E29;Q86BI4	Q59E30;Q95RI5	Failed axon connections	fax	tr|Q59E30|Q59E30_DROME Failed axon connections, isoform C OS=Drosophila melanogaster OX=7227 GN=fax PE=1 SV=1;sp|Q95RI5|FAXC_DROME Failed axon connections OS=Drosophila melanogaster OX=7227 GN=fax PE=1 SV=1	0	0	0	0	0	0	0	0	0	26480000	8269300	37811000	14311000	86051000	27745000	626110	201350	597770	2538600	3328800	22210000	2262900	18229000	25441000	4153100	5459600	30968000	NaN	NaN	NaN	0.36962	0.54294	0.50173	0.97568	4.308	0.97734	NaN	NaN	NaN	1.9177	1.8681	0.90524	6.1697	9.4596	7.1668
Q8MLS1	Q8MLS1	5-formyltetrahydrofolate cyclo-ligase		tr|Q8MLS1|Q8MLS1_DROME 5-formyltetrahydrofolate cyclo-ligase OS=Drosophila melanogaster OX=7227 GN=Mthfs PE=3 SV=1	183830000	180760000	48103000	225690000	240310000	49985000	206450000	192760000	37966000	39928000	68344000	13328000	33546000	56323000	22170000	2808200	4607500	269200	19042000	42363000	22143000	5166600	26865000	11278000	12556000	61492000	37048000	0.93963	1.1827	1.0995	1.4032	1.9397	1.4543	3.9341	3.6794	4.6529	0.22182	0.22113	0.18531	0.22439	0.41378	0.11449	1.7995	2.8051	1.9538
Q9VKW5	Q9VKW5			tr|Q9VKW5|Q9VKW5_DROME Prolyl endopeptidase OS=Drosophila melanogaster OX=7227 GN=Dmel\CG5355 PE=1 SV=2	7633600	7611600	4665600	6184000	5177100	2550700	5930900	4982300	2607300	12701000	13130000	11656000	9789400	12620000	8645700	171540	57470	216090	4735600	12842000	22111000	1274000	2958800	8073800	6129400	15792000	23666000	0.91508	1.0317	0.79058	0.81379	0.95355	0.36051	2.5059	2.0706	2.4015	0.45327	0.37059	0.4453	1.0144	1.1662	1.304	6.1674	5.9944	2.5362
Q9VUN8	Q9VUN8			tr|Q9VUN8|Q9VUN8_DROME Sugar transporter SWEET OS=Drosophila melanogaster OX=7227 GN=Dmel\CG7272 PE=1 SV=1	0	0	0	16512000	17535000	3241600	11940000	15172000	3298200	28785000	22570000	10369000	39268000	26865000	11460000	0	0	0	23493000	28293000	21809000	20774000	42684000	37258000	5497500	4819600	4072400	NaN	0.98728	1.2369	0.71891	0.76327	NaN	1.3951	2.3364	0.90734	NaN	0.18714	0.20289	0.27273	0.23911	NaN	0.81651	1.6677	0.65075
A4V4A5;Q9VZ23	A4V4A5;Q9VZ23	GTP-binding nuclear protein Ran	Ran;ran	tr|A4V4A5|A4V4A5_DROME GTP-binding nuclear protein OS=Drosophila melanogaster OX=7227 GN=Ran PE=1 SV=1;sp|Q9VZ23|RAN_DROME GTP-binding nuclear protein Ran OS=Drosophila melanogaster OX=7227 GN=Ran PE=1 SV=1	28580000	32029000	30642000	23676000	27704000	5724400	16489000	24706000	29804000	12409000	9652300	8440600	6201100	2002900	1755900	0	0	0	5268500	11660000	21808000	1968400	2784000	5899700	1619000	3141600	8076200	0.98629	1.231	1.1328	0.86936	0.59332	NaN	1.7193	1.151	2.634	0.22043	0.27706	0.30949	0.63931	0.43399	NaN	2.3031	2.8769	3.9011
P41572;M9PIS3	P41572;M9PIS3	6-phosphogluconate dehydrogenase, decarboxylating	Pgd	sp|P41572|6PGD_DROME 6-phosphogluconate dehydrogenase, decarboxylating OS=Drosophila melanogaster OX=7227 GN=Pgd PE=2 SV=1;tr|M9PIS3|M9PIS3_DROME 6-phosphogluconate dehydrogenase, decarboxylating OS=Drosophila melanogaster OX=7227 GN=Pgd PE=3 SV=1	296060000	352660000	125470000	395770000	476710000	115260000	249290000	305310000	98243000	57711000	91453000	56864000	55562000	80828000	33097000	109130	160900	0	16060000	27386000	21417000	5217900	15284000	8376900	22622000	60567000	41915000	1.1801	1.2981	1.3544	1.3426	1.3593	1.2666	1.7922	3.5442	5.2765	0.26402	0.26192	0.29002	0.51222	0.53835	0.60304	1.4042	2.4664	3.4112
Q9VX36	Q9VX36		ND-24	tr|Q9VX36|Q9VX36_DROME NADH dehydrogenase (Ubiquinone) 24 kDa subunit, isoform A OS=Drosophila melanogaster OX=7227 GN=ND-24 PE=1 SV=1	15640000	12622000	5868600	12324000	11566000	4701500	25195000	18202000	8370500	31783000	18998000	37547000	15956000	7281000	20613000	3565200	1986700	4811600	3999500	5342100	21411000	7549100	10362000	39026000	4268700	6983800	22787000	0.88333	0.88525	0.60074	0.5707	0.41165	0.50621	1.4344	1.9691	1.3044	0.34824	0.38553	0.28534	1.0377	1.1501	1.135	6.9788	4.8901	3.7866
A0A0B4KGI5;E1JIJ8;P07140	A0A0B4KGI5;E1JIJ8;P07140	Carboxylic ester hydrolase;Acetylcholinesterase;Acetylcholinesterase 16 kDa subunit;Acetylcholinesterase 55 kDa subunit	Ace	tr|A0A0B4KGI5|A0A0B4KGI5_DROME Carboxylic ester hydrolase OS=Drosophila melanogaster OX=7227 GN=Ace PE=1 SV=1;tr|E1JIJ8|E1JIJ8_DROME Carboxylic ester hydrolase OS=Drosophila melanogaster OX=7227 GN=Ace PE=1 SV=1;sp|P07140|ACES_DROME Acetylcholinesterase OS	0	0	0	0	0	0	0	0	0	2389000	519870	8119300	9351500	6002300	16801000	0	0	0	2747500	3131300	21139000	1756200	2714900	19850000	2676600	4624800	23095000	NaN	NaN	NaN	0.23212	0.23202	NaN	1.3594	1.6446	1.7816	NaN	NaN	NaN	2.3919	1.867	NaN	5.7994	12.181	10.592
A0A0B4KFZ7;Q9VHB1	A0A0B4KFZ7;Q9VHB1			tr|A0A0B4KFZ7|A0A0B4KFZ7_DROME Mitochondrial pyruvate carrier OS=Drosophila melanogaster OX=7227 GN=Dmel\CG9399 PE=1 SV=1;tr|Q9VHB1|Q9VHB1_DROME Mitochondrial pyruvate carrier OS=Drosophila melanogaster OX=7227 GN=Dmel\CG9399 PE=1 SV=1	22109000	33028000	3278100	34860000	57384000	4734700	50280000	73249000	6290500	29193000	30858000	17987000	22462000	22903000	13724000	0	0	0	6920700	16490000	21125000	5829000	20334000	19931000	11349000	49966000	49358000	1.1934	1.6033	1.9104	0.96897	0.89661	NaN	3.1564	3.543	4.8017	0.15163	0.15364	0.13222	0.47487	0.59117	NaN	2.7624	3.3188	3.8873
A4UZL5;P41043;A0A0B4KFT5	A4UZL5;P41043;A0A0B4KFT5	Glutathione S-transferase S1	GstS1	tr|A4UZL5|A4UZL5_DROME glutathione transferase OS=Drosophila melanogaster OX=7227 GN=GstS1 PE=1 SV=1;sp|P41043|GSTS1_DROME Glutathione S-transferase S1 OS=Drosophila melanogaster OX=7227 GN=GstS1 PE=1 SV=2;tr|A0A0B4KFT5|A0A0B4KFT5_DROME glutathione transfe	117940000	125060000	42730000	64011000	80491000	29081000	90283000	145290000	35244000	54955000	66008000	34134000	29711000	33594000	21865000	9121800	4526100	2881000	3294300	13909000	21045000	33034000	51634000	72995000	36011000	125910000	131000000	1.1102	1.1699	1.1403	1.254	1.0793	0.56363	4.6021	2.1877	3.1608	0.37024	0.40446	0.22109	0.50929	0.70165	0.81409	4.9542	2.7739	4.1627
Q9VXK7	Q9VXK7		ND-20	tr|Q9VXK7|Q9VXK7_DROME LD31474p OS=Drosophila melanogaster OX=7227 GN=ND-20 PE=1 SV=1	24063000	24758000	10455000	17477000	10127000	5872600	8344500	10404000	2439800	24851000	19428000	31006000	17241000	15409000	23602000	0	0	0	3954600	7750000	20775000	8202300	12363000	32137000	3561700	8001900	22138000	1.1164	0.75236	0.82937	0.73087	0.71133	NaN	1.8943	1.7019	2.3798	0.26016	0.31024	0.24296	1.0439	1.2409	NaN	4.6897	3.9917	5.5947
X2JC31;P29742	X2JC31;P29742	Clathrin heavy chain	Chc	tr|X2JC31|X2JC31_DROME Clathrin heavy chain OS=Drosophila melanogaster OX=7227 GN=Chc PE=3 SV=1;sp|P29742|CLH_DROME Clathrin heavy chain OS=Drosophila melanogaster OX=7227 GN=Chc PE=1 SV=1	17915000	23440000	6130700	15826000	20699000	4800900	13672000	16595000	3930200	8985000	6863700	9937200	15194000	11348000	16346000	370670	773880	519810	3577300	10204000	20757000	2978500	7745900	18671000	2723800	9629600	23192000	1.0777	1.3384	1.1264	0.81689	0.68644	0.77749	4.1782	3.1939	4.2671	0.14468	0.14743	0.22264	1.009	1.084	1.2392	6.0336	6.8903	8.5901
Q9VTU2	Q9VTU2		ND-SGDH	tr|Q9VTU2|Q9VTU2_DROME NADH dehydrogenase [ubiquinone] 1 beta subcomplex subunit 5, mitochondrial OS=Drosophila melanogaster OX=7227 GN=ND-SGDH PE=1 SV=1	37523000	33545000	11449000	31160000	30468000	12454000	25175000	32351000	7923600	46984000	50254000	88063000	60348000	51197000	114120000	0	0	0	2148600	5651000	20753000	6788800	7603200	23267000	4021600	6641200	32119000	1.04	0.98453	1.1322	0.80697	0.61759	NaN	2.032	0.90634	1.5464	0.25967	0.28946	0.28988	1.7811	1.8572	NaN	8.6994	3.3794	7.6049
Q9VYU9	Q9VYU9			tr|Q9VYU9|Q9VYU9_DROME RH17287p OS=Drosophila melanogaster OX=7227 GN=Dmel\CG9360 PE=1 SV=1	5017400	3742100	9920400	0	0	0	6946300	4160900	1200000	49548000	30488000	14378000	56369000	41131000	25865000	1611600	1135000	460880	5266400	20073000	20235000	3381000	11793000	10422000	7670200	19844000	23369000	0.71137	NaN	0.72615	0.60818	0.69301	0.67465	3.8602	3.6092	3.2089	1.2963	NaN	0.1639	0.31244	0.43345	0.34574	3.6257	2.6727	3.9359
Q8SZA8	Q8SZA8			sp|Q8SZA8|ADXH2_DROME Adrenodoxin-like protein 2, mitochondrial OS=Drosophila melanogaster OX=7227 GN=Fdx2 PE=2 SV=1	13226000	25358000	7099900	14585000	20254000	4944600	25415000	30373000	27077000	0	0	0	0	0	0	6282700	4250300	4933600	6799300	10884000	20083000	0	0	0	0	0	0	1.957	1.5739	1.2087	NaN	NaN	0.92403	2.2026	NaN	NaN	0.55242	NaN	1.1759	NaN	NaN	0.62114	4.546	NaN	NaN
Q9VTV3;Q8IQG9	Q9VTV3;Q8IQG9		Adk1	tr|Q9VTV3|Q9VTV3_DROME AT17975p OS=Drosophila melanogaster OX=7227 GN=Ak1 PE=1 SV=1;tr|Q8IQG9|Q8IQG9_DROME Adenylate kinase 1, isoform B OS=Drosophila melanogaster OX=7227 GN=Ak1 PE=1 SV=1	0	0	0	0	0	0	0	0	0	22138000	3016000	10260000	0	0	0	0	0	0	10653000	18335000	20028000	10515000	3519000	10437000	18806000	25923000	31552000	NaN	NaN	NaN	0.1963	NaN	NaN	1.2801	0.31377	1.0216	NaN	NaN	NaN	0.50879	NaN	NaN	2.5436	0.62637	1.3001
A0A0B4KHZ1;Q9VCI3-3;Q9VCI3;Q9VCI3-2	A0A0B4KHZ1;Q9VCI3-3;Q9VCI3;Q9VCI3-2	Lipid storage droplets surface-binding protein 1	Lsd-1	tr|A0A0B4KHZ1|A0A0B4KHZ1_DROME Lipid storage droplet-1, isoform D OS=Drosophila melanogaster OX=7227 GN=Lsd-1 PE=1 SV=1;sp|Q9VCI3-3|LSD1_DROME Isoform C of Lipid storage droplets surface-binding protein 1 OS=Drosophila melanogaster OX=7227 GN=Lsd-1;sp|Q9VC	85328000	91845000	16134000	82344000	101040000	17049000	91091000	108340000	18966000	62268000	56784000	11097000	28127000	25551000	6289100	1231300	1375000	430510	11650000	42920000	19990000	16350000	42550000	20559000	17189000	62534000	32894000	1.0842	1.3048	1.166	0.99656	1.0024	1.0584	3.4389	3.2898	3.7676	0.14118	0.31596	0.12996	0.16165	0.15365	NaN	1.7184	1.4573	1.9691
A0A0B4LGZ8;Q8SY61	A0A0B4LGZ8;Q8SY61	General odorant-binding protein 56d	Obp56d	tr|A0A0B4LGZ8|A0A0B4LGZ8_DROME GEO07517p1 OS=Drosophila melanogaster OX=7227 GN=Obp56d PE=1 SV=1;sp|Q8SY61|OB56D_DROME General odorant-binding protein 56d OS=Drosophila melanogaster OX=7227 GN=Obp56d PE=1 SV=2	0	0	0	0	0	0	0	0	0	21574000	31626000	4056900	46753000	65682000	9246200	52682000	64999000	8551000	7601700	47885000	19688000	7169000	30206000	17613000	6328300	32632000	18287000	NaN	NaN	NaN	1.3049	1.3836	1.2495	6.3646	4.6414	5.8179	NaN	NaN	NaN	0.15163	0.18658	0.15829	2.5968	2.1805	2.9189
E2QCF1;A0A0B4LFH8;Q7KN85	E2QCF1;A0A0B4LFH8;Q7KN85		ATPCL	tr|E2QCF1|E2QCF1_DROME ATP-citrate synthase OS=Drosophila melanogaster OX=7227 GN=Acly PE=1 SV=1;tr|A0A0B4LFH8|A0A0B4LFH8_DROME ATP-citrate synthase OS=Drosophila melanogaster OX=7227 GN=Acly PE=1 SV=1;tr|Q7KN85|Q7KN85_DROME ATP-citrate synthase OS=Drosoph	250450000	504170000	95641000	250440000	540490000	94954000	218320000	434730000	61406000	32572000	41171000	25199000	20192000	29366000	14338000	485800	765080	286200	7269400	21683000	19555000	4165700	16231000	15106000	6880500	30177000	23242000	1.8956	2.7385	1.9819	1.8225	1.8514	1.308	3.5185	4.3195	5.1906	0.16418	0.13804	0.13296	0.63971	0.69242	0.57241	2.8736	3.296	3.5443
Q9VB96;A0A0B4K6I6	Q9VB96;A0A0B4K6I6			tr|Q9VB96|Q9VB96_DROME Uncharacterized protein, isoform A OS=Drosophila melanogaster OX=7227 GN=Dmel\CG31075 PE=1 SV=2;tr|A0A0B4K6I6|A0A0B4K6I6_DROME Uncharacterized protein, isoform B OS=Drosophila melanogaster OX=7227 GN=CT19744 PE=1 SV=1	2546200	6879600	2068300	0	0	0	0	0	0	19091000	33527000	9735500	20008000	39612000	9928800	0	0	0	10806000	26505000	19464000	1475700	8227600	5779500	9975500	45854000	27823000	1.9959	NaN	NaN	1.5719	2.0645	NaN	3.3403	5.4413	4.6356	1.3979	NaN	NaN	0.33711	0.53007	NaN	3.1156	3.8131	3.4031
Q9VFR2;Q8I0D4	Q9VFR2;Q8I0D4		CG9297-RA	tr|Q9VFR2|Q9VFR2_DROME FI18807p1 OS=Drosophila melanogaster OX=7227 GN=Dmel\CG9297 PE=1 SV=1;tr|Q8I0D4|Q8I0D4_DROME RE20510p OS=Drosophila melanogaster OX=7227 GN=Dmel\CG9297 PE=1 SV=1	7053900	1941800	9101200	8520300	1398900	11742000	2386000	503410	2602700	17131000	15423000	41488000	8844700	1479500	42156000	238180	63383	1316900	2135100	538390	19405000	3441200	7584600	29797000	13656000	23093000	55763000	0.24926	0.2441	0.21446	1.0459	0.43542	0.22502	0.43583	1.3933	1.2188	1.2439	1.3096	1.3457	2.2475	2.508	3.9713	4.0973	6.9482	7.1164
Q9V3N7;Q8IPQ2;Q9VND9	Q9V3N7;Q8IPQ2;Q9VND9		CRMP	tr|Q9V3N7|Q9V3N7_DROME BcDNA.HL02693 OS=Drosophila melanogaster OX=7227 GN=CRMP PE=1 SV=1;tr|Q8IPQ2|Q8IPQ2_DROME Collapsin response mediator protein OS=Drosophila melanogaster OX=7227 GN=CRMP PE=1 SV=2;tr|Q9VND9|Q9VND9_DROME Collapsin response mediator pro	5345200	1900000	3437700	0	0	0	0	0	0	14702000	5670300	24898000	11946000	11362000	17864000	0	0	0	2277100	9456000	19151000	2666300	2291200	13091000	30059000	7255400	31898000	0.36982	NaN	NaN	0.36119	0.35505	NaN	3.4564	0.8082	0.6192	0.4776	NaN	NaN	1.4937	1.7478	NaN	7.2699	5.4729	2.0771
X2JKU5;Q24186;Q9VFE4;A0A0B4K683	X2JKU5;Q24186;Q9VFE4	40S ribosomal protein S5a;40S ribosomal protein S5b	RpS5a;RpS5b	tr|X2JKU5|X2JKU5_DROME Ribosomal protein S5a, isoform B OS=Drosophila melanogaster OX=7227 GN=RpS5a PE=3 SV=1;sp|Q24186|RS5A_DROME Small ribosomal subunit protein uS7A OS=Drosophila melanogaster OX=7227 GN=RpS5a PE=1 SV=1;sp|Q9VFE4|RS5B_DROME Small ribosom	36171000	43934000	37012000	89668000	88639000	50875000	32524000	48602000	25130000	4443900	6959400	21168000	8202400	8027900	3223100	0	0	0	4069700	4653900	19105000	0	0	0	0	0	0	0.71171	1.1676	1.3216	0.79707	0.8181	NaN	1.6898	NaN	NaN	1.4422	0.46725	0.73157	2.9285	0.3482	NaN	5.6878	NaN	NaN
Q8IN44	Q8IN44	Protein Turandot A	TotA	sp|Q8IN44|TOTA_DROME Protein Turandot A OS=Drosophila melanogaster OX=7227 GN=TotA PE=1 SV=1	69158000	125110000	19761000	6179600	15153000	5176600	0	0	0	80263000	105490000	11404000	4818900	13258000	5675500	19788000	35326000	3081000	10072000	73715000	19009000	1930700	14108000	5059500	3565800	16654000	10231000	1.8228	3.0633	NaN	1.3418	4.1595	2.319	5.7893	2.6879	4.004	0.24329	NaN	NaN	0.16837	2.1597	0.26067	1.7539	0.82412	1.8483
Q27580;X2JF40;M9PHN8	Q27580;X2JF40;M9PHN8	Adenosylhomocysteinase	Ahcy13	sp|Q27580|SAHH_DROME Adenosylhomocysteinase OS=Drosophila melanogaster OX=7227 GN=Ahcy PE=1 SV=2;tr|X2JF40|X2JF40_DROME Adenosylhomocysteinase, isoform C OS=Drosophila melanogaster OX=7227 GN=Ahcy PE=3 SV=1;tr|M9PHN8|M9PHN8_DROME Adenosylhomocysteinase, is	106620000	161090000	30577000	76409000	123320000	25388000	81957000	112600000	28673000	26603000	46298000	10052000	13119000	15943000	4448000	0	0	0	17610000	26897000	18861000	3283100	16208000	11346000	16169000	39313000	28800000	1.4303	1.6004	1.4549	1.8013	1.8363	NaN	1.1031	3.0656	3.6518	0.26379	0.28686	0.2891	0.44524	0.49412	NaN	0.80667	4.7382	3.2665
Q94523	Q94523	Succinate dehydrogenase [ubiquinone] flavoprotein subunit, mitochondrial	SdhA	sp|Q94523|SDHA_DROME Succinate dehydrogenase [ubiquinone] flavoprotein subunit, mitochondrial OS=Drosophila melanogaster OX=7227 GN=SdhA PE=2 SV=3	10977000	9424500	5081100	13050000	12364000	7454600	7333200	8572100	5010600	43209000	15890000	74388000	50374000	15688000	78532000	1538500	659230	2838000	11090000	4041200	18808000	7474600	9991300	51591000	10607000	14705000	68949000	0.86178	0.98245	1.1749	0.32005	0.28806	0.38211	0.8259	1.4651	1.6475	0.44542	0.46306	0.44597	1.5008	1.6053	1.7579	5.4458	5.0599	5.2023
B5RIU6;Q8T390	B5RIU6;Q8T390	Endophilin-A	EndoA;endoA	tr|B5RIU6|B5RIU6_DROME Endophilin-A OS=Drosophila melanogaster OX=7227 GN=EndoA PE=1 SV=1;sp|Q8T390|SH3G3_DROME Endophilin-A OS=Drosophila melanogaster OX=7227 GN=EndoA PE=1 SV=1	0	0	0	0	0	0	0	0	0	14592000	10668000	6762200	15935000	8622700	9900200	0	0	0	33379000	9789100	18638000	37548000	9965000	24529000	33966000	13137000	16179000	NaN	NaN	NaN	0.85949	0.46376	NaN	0.29708	0.43208	0.36326	NaN	NaN	NaN	0.48175	0.83014	NaN	0.34686	2.8514	0.42701
Q9U9Q4	Q9U9Q4	Eukaryotic translation initiation factor 3 subunit H	eIF-3p40	sp|Q9U9Q4|EIF3H_DROME Eukaryotic translation initiation factor 3 subunit H OS=Drosophila melanogaster OX=7227 GN=eIF3h PE=1 SV=2	16365000	14357000	2913500	17628000	20177000	2530400	9396800	11162000	1806700	8967500	8729200	3986300	8867900	9117600	3916300	265410	201930	100550	4419600	16457000	18362000	2065300	6633300	7812400	2772800	8172400	11532000	1.0516	1.1012	1.1658	0.91513	0.98374	1.0718	3.157	2.814	3.1398	0.19401	0.15986	0.18292	0.31517	0.35636	0.59685	3.368	4.395	3.484
Q7KV34	Q7KV34			tr|Q7KV34|Q7KV34_DROME CHK kinase-like domain-containing protein OS=Drosophila melanogaster OX=7227 GN=pkm PE=1 SV=1	0	0	0	0	0	0	0	0	0	15264000	39460000	7004800	19098000	10533000	10163000	2009700	1278900	813980	5845800	14761000	18183000	3686400	8669100	10567000	5201100	13562000	15959000	NaN	NaN	NaN	0.54636	0.51705	0.66577	2.1698	2.3714	2.203	NaN	NaN	NaN	0.37821	0.4685	0.45579	3.0072	3.6318	3.0813
A0A0B4K7L1;P52034-3;P52034;P52034-2;A0A0B4KFI7	A0A0B4K7L1;P52034-3;P52034;P52034-2;A0A0B4KFI7	ATP-dependent 6-phosphofructokinase	Pfk	tr|A0A0B4K7L1|A0A0B4K7L1_DROME ATP-dependent 6-phosphofructokinase OS=Drosophila melanogaster OX=7227 GN=Pfk PE=1 SV=1;sp|P52034-3|PFKA_DROME Isoform C of ATP-dependent 6-phosphofructokinase OS=Drosophila melanogaster OX=7227 GN=Pfk;sp|P52034|PFKA_DROME AT	8147500	12684000	8343100	3295400	7040000	1713100	3948700	7605200	2433700	8906400	6183200	12663000	14181000	8858500	14616000	145990	69104	90513	3832100	8271000	18164000	2336200	4264400	10858000	4867800	10820000	20018000	1.3986	1.7343	4.597	0.65785	0.58319	0.57502	2.282	1.9985	1.9019	0.51845	0.55029	0.77749	0.88779	0.92455	0.65302	4.225	6.8807	3.7164
Q9W4A6	Q9W4A6			tr|Q9W4A6|Q9W4A6_DROME Otopetrin-like a, isoform A OS=Drosophila melanogaster OX=7227 GN=OtopLa PE=1 SV=1	0	0	0	0	0	0	0	0	0	1245700	641580	26237000	1159200	525900	9480100	0	0	0	2416400	1761400	18116000	429320	842500	15108000	392230	1064800	26323000	NaN	NaN	NaN	0.3634	0.35658	NaN	0.90238	1.3524	3.21	NaN	NaN	NaN	9.7158	6.3184	NaN	14.634	25.479	39.087
B7YZI0;Q9V7N5-2;Q9V7N5-3;Q9V7N5	B7YZI0;Q9V7N5-2;Q9V7N5-3;Q9V7N5	V-type proton ATPase subunit C	Vha44	tr|B7YZI0|B7YZI0_DROME Vacuolar H[+] ATPase 44kD subunit, isoform F OS=Drosophila melanogaster OX=7227 GN=Vha44 PE=1 SV=1;sp|Q9V7N5-2|VATC_DROME Isoform A of V-type proton ATPase subunit C OS=Drosophila melanogaster OX=7227 GN=Vha44;sp|Q9V7N5-3|VATC_DROME	2448900	2041700	958770	2135800	2572000	1067400	0	0	0	32993000	12986000	25202000	34031000	13024000	19642000	411010	159820	388000	3717100	8332700	17962000	2999200	9686300	19712000	4110000	12006000	24108000	0.74554	1.0247	NaN	0.40095	0.4524	0.36449	2.3954	2.4538	2.3387	0.9429	0.63185	NaN	0.73921	0.65081	0.81066	4.3018	4.0923	4.551
Q9VAI9;A0A0B4KI20	Q9VAI9;A0A0B4KI20		Obp99c	tr|Q9VAI9|Q9VAI9_DROME GEO07291p1 OS=Drosophila melanogaster OX=7227 GN=Obp99c PE=1 SV=1;tr|A0A0B4KI20|A0A0B4KI20_DROME Odorant-binding protein 99c, isoform B OS=Drosophila melanogaster OX=7227 GN=Obp99c PE=1 SV=1	31151000	111700000	27434000	42866000	107930000	12220000	36646000	62762000	13002000	57409000	82165000	16110000	50656000	120840000	18429000	30566000	120070000	22538000	14545000	76437000	17740000	16824000	84136000	43754000	25769000	120180000	38228000	6.3661	3.9297	2.6154	1.7675	1.5426	3.6782	7.4551	3.3239	4.6076	0.83222	0.31721	0.5777	0.2931	0.31351	0.38118	1.8721	1.3396	1.5455
P36241	P36241	60S ribosomal protein L19	RpL19	sp|P36241|RL19_DROME Large ribosomal subunit protein eL19 OS=Drosophila melanogaster OX=7227 GN=RpL19 PE=1 SV=2	138740000	158840000	106140000	173410000	246670000	89698000	112920000	132950000	65100000	24809000	34389000	11995000	17427000	17875000	8043000	4663900	6450900	1635100	5254300	14037000	17448000	5073900	24501000	19112000	8645100	29819000	35224000	1.1849	1.3891	1.2366	1.007	0.92579	1.1045	2.4951	4.5563	3.7833	0.30835	0.26883	0.27914	0.33187	0.29172	0.54846	2.9855	4.1291	3.1172
A4V2K7;P22058	A4V2K7;P22058	Chromosomal protein D1	D1	tr|A4V2K7|A4V2K7_DROME D1 chromosomal protein, isoform C OS=Drosophila melanogaster OX=7227 GN=D1 PE=1 SV=1;sp|P22058|CPD1_DROME Chromosomal protein D1 OS=Drosophila melanogaster OX=7227 GN=D1 PE=1 SV=3	0	0	0	0	0	0	0	0	0	0	0	0	0	0	0	12446000	6644800	21603000	1274500	3156900	17402000	0	0	0	912030	2951100	18567000	NaN	NaN	NaN	NaN	NaN	0.5616	1.8402	NaN	4.3042	NaN	NaN	NaN	NaN	NaN	1.4115	7.8346	NaN	19.041
A4V4F2;M9PHT0;F2FB46;M9PJN2;M9PHL7;O61492-3;O61492-2;O61492;C9QP31;E1JJL2;O61492-4	A4V4F2;M9PHT0;F2FB46;M9PJN2;M9PHL7;O61492-3;O61492-2;O61492;C9QP31;E1JJL2;O61492-4	Flotillin-2	Flo2;Flo-2	tr|A4V4F2|A4V4F2_DROME Flotillin 2, isoform F OS=Drosophila melanogaster OX=7227 GN=Flo2 PE=1 SV=1;tr|M9PHT0|M9PHT0_DROME Flotillin 2, isoform I OS=Drosophila melanogaster OX=7227 GN=Flo2 PE=1 SV=1;tr|F2FB46|F2FB46_DROME Flotillin 2, isoform K OS=Drosophil	0	0	0	0	0	0	0	0	0	1998300	383960	2074200	4757000	5566500	6344000	0	0	0	3606200	3737500	17128000	2688600	999710	12206000	5208600	6808200	21984000	NaN	NaN	NaN	0.29468	0.67794	NaN	1.3143	0.2955	1.3822	NaN	NaN	NaN	1.0427	1.2098	NaN	5.8682	1.4898	7.947
Q7KUQ5;Q9VVB7;Q8IQQ3;Q9VVB5;M9PFX9;M9MRX0;Q9VVB8	Q7KUQ5;Q9VVB7;Q8IQQ3;Q9VVB5;M9PFX9;M9MRX0;Q9VVB8		Lmpt	tr|Q7KUQ5|Q7KUQ5_DROME Limpet, isoform F OS=Drosophila melanogaster OX=7227 GN=Lmpt PE=1 SV=1;tr|Q9VVB7|Q9VVB7_DROME FI02842p OS=Drosophila melanogaster OX=7227 GN=Lmpt PE=1 SV=2;tr|Q8IQQ3|Q8IQQ3_DROME Limpet, isoform D OS=Drosophila melanogaster OX=7227 G	3904500	717460	9278000	5498000	706400	14189000	3815600	441930	10363000	3951000	515470	14095000	0	0	16951000	0	0	1591400	0	0	17024000	1005400	857430	11664000	2010100	1198500	19689000	0.17146	0.16959	0.14863	0.18515	NaN	NaN	NaN	0.94694	1.0177	2.2807	2.2761	2.1046	2.8166	NaN	NaN	NaN	10.787	9.6055
Q9VGF7	Q9VGF7		GC1	tr|Q9VGF7|Q9VGF7_DROME Glutamate carrier 1, isoform A OS=Drosophila melanogaster OX=7227 GN=GC1 PE=1 SV=1	0	0	0	419280	157950	35381	0	0	0	18045000	9089400	32912000	11867000	4879700	21688000	0	0	798710	439140	1439100	16988000	2105700	2008600	18269000	9392200	3794900	12267000	NaN	0.60351	NaN	0.36453	0.37456	NaN	4.3476	0.86825	0.65382	NaN	NaN	NaN	1.5737	1.5753	NaN	15.42	4.7136	2.4375
Q9W3L4	Q9W3L4			tr|Q9W3L4|Q9W3L4_DROME GH20802p OS=Drosophila melanogaster OX=7227 GN=Dmel\CG2233 PE=1 SV=1	90126000	245830000	30710000	98936000	250610000	32060000	93867000	284970000	51332000	122640000	384020000	44134000	110490000	331590000	36482000	7999500	24746000	1242800	8904200	95648000	16606000	15879000	193840000	36853000	21573000	351940000	61118000	3.2406	2.6511	3.3692	2.8435	3.0935	3.0628	11.362	12.135	15.278	0.17285	0.14438	0.14706	0.15311	0.11633	0.18293	1.7793	2.3484	2.899
Q9VI64	Q9VI64			tr|Q9VI64|Q9VI64_DROME LD30995p OS=Drosophila melanogaster OX=7227 GN=Dmel\CG10098 PE=1 SV=1	0	0	0	0	0	0	0	0	0	1481500	733000	3986600	1008800	595630	2648000	0	0	0	10870000	640290	16521000	0	0	12742000	4404600	692350	15181000	NaN	NaN	NaN	0.34691	0.80696	NaN	0.17753	NaN	0.14589	NaN	NaN	NaN	2.0861	2.4228	NaN	0.93231	NaN	0.83286
A1Z7H3;A0A0B4KFE4;Q8T3L1;A1Z7H2	A1Z7H3;A0A0B4KFE4;Q8T3L1;A1Z7H2		Acsl	tr|A1Z7H3|A1Z7H3_DROME long-chain-fatty-acid--CoA ligase OS=Drosophila melanogaster OX=7227 GN=Acsl PE=1 SV=1;tr|A0A0B4KFE4|A0A0B4KFE4_DROME long-chain-fatty-acid--CoA ligase OS=Drosophila melanogaster OX=7227 GN=Acsl PE=1 SV=1;tr|Q8T3L1|Q8T3L1_DROME long-	203380000	280440000	53312000	298920000	482120000	77100000	208880000	338970000	68093000	97095000	94610000	28370000	42562000	59135000	14886000	0	0	0	8169500	25272000	16450000	4696300	16148000	9168500	22336000	50212000	26866000	1.5285	1.624	1.5816	1.3053	1.3372	NaN	3.9182	6.4364	4.6684	0.18859	0.12685	0.12131	0.30102	0.26622	NaN	2.404	4.1901	2.2684
Q9VMI3;A1ZAW7	Q9VMI3		ND-51	tr|Q9VMI3|Q9VMI3_DROME NADH dehydrogenase [ubiquinone] flavoprotein 1, mitochondrial OS=Drosophila melanogaster OX=7227 GN=ND-51 PE=1 SV=1	24873000	23045000	8355700	51725000	41555000	14514000	36377000	37183000	14701000	32320000	12121000	19960000	21040000	10155000	17945000	0	0	0	6041200	8078800	16410000	5524000	8584100	25435000	4598400	9514600	24979000	1.1489	0.94794	0.85817	0.61462	0.65834	NaN	1.9392	1.4602	1.8722	0.39314	0.26236	0.34694	0.81273	0.90667	NaN	2.5426	3.8024	4.865
X2J8F5;P11996;P11995;P11997	X2J8F5;P11996	Larval serum protein 1 beta chain	Lsp1beta	tr|X2J8F5|X2J8F5_DROME Larval serum protein 1 beta, isoform B OS=Drosophila melanogaster OX=7227 GN=Lsp1beta PE=3 SV=1;sp|P11996|LSP1B_DROME Larval serum protein 1 beta chain OS=Drosophila melanogaster OX=7227 GN=Lsp1beta PE=2 SV=3	25395000	62894000	13377000	8110300	23072000	989440	3267100	10581000	652080	27616000	92322000	15483000	88229000	266910000	35249000	2219300	10691000	3357800	7217600	37529000	16403000	1667700	19497000	6131800	8231700	77329000	24456000	3.5207	2.9611	2.9384	3.1329	3.0099	3.5868	5.1347	8.4763	8.3049	0.49919	0.1457	0.22469	0.45205	0.41414	0.67457	2.0903	2.6473	2.5407
Q8SXQ1	Q8SXQ1			tr|Q8SXQ1|Q8SXQ1_DROME aldehyde dehydrogenase (NAD(+)) OS=Drosophila melanogaster OX=7227 GN=Aldh7A1 PE=1 SV=1	57006000	48226000	13387000	75850000	76480000	15314000	53735000	50139000	10557000	32454000	31284000	9176200	40761000	32558000	9652400	322450	446940	71090	6421500	23232000	16359000	5777900	22360000	12679000	8568000	40529000	26379000	1.0475	1.0926	0.96999	0.89692	0.89263	1.0564	3.8501	3.9649	4.8864	0.22534	0.20177	0.19485	0.27138	0.30441	0.19097	2.2729	2.4459	2.8867
Q9I7J0	Q9I7J0			tr|Q9I7J0|Q9I7J0_DROME GH21596p OS=Drosophila melanogaster OX=7227 GN=Dmel\CG5023 PE=1 SV=1	50555000	15815000	58835000	53947000	15386000	67354000	54161000	11626000	51524000	8034200	740450	3857400	0	0	0	0	0	0	4792700	3782900	16338000	852690	712780	2645900	2857900	3426500	11938000	0.35767	0.31457	0.27729	0.2891	NaN	NaN	0.95784	0.96041	1.3699	0.90446	0.88159	0.8536	0.98445	NaN	NaN	3.2104	3.1533	4.0063
Q9VMU0	Q9VMU0		ND-13A	tr|Q9VMU0|Q9VMU0_DROME NADH dehydrogenase [ubiquinone] iron-sulfur protein 6, mitochondrial OS=Drosophila melanogaster OX=7227 GN=ND-13A PE=1 SV=1	21473000	16192000	7798900	17614000	18538000	6708200	15074000	13931000	4480100	0	0	0	4606800	4461600	9024200	0	0	0	3100800	4498200	16213000	1001200	3292900	10143000	1703600	7037500	13389000	0.87557	0.93127	1.1798	NaN	1.3831	NaN	1.2661	2.9062	2.4005	0.61044	0.29421	0.3997	NaN	1.7803	NaN	4.6623	8.4342	3.2196
O18373	O18373	Selenide, water dikinase	SelD	sp|O18373|SPS1_DROME Inactive selenide, water dikinase-like protein OS=Drosophila melanogaster OX=7227 GN=Sps1 PE=2 SV=1	10056000	5672900	5679700	0	0	0	0	0	0	2485100	1015200	4051600	4508500	2728600	11925000	0	0	0	1732900	2498400	16154000	653400	1231700	5954600	622770	1169300	7246000	0.9457	NaN	NaN	0.38359	0.55071	NaN	1.2885	2.7984	1.3544	0.83303	NaN	NaN	1.4694	2.696	NaN	11.688	6.264	5.6186
Q9VZY0	Q9VZY0		Non2	tr|Q9VZY0|Q9VZY0_DROME LD45195p OS=Drosophila melanogaster OX=7227 GN=Non2 PE=1 SV=1	0	0	0	0	0	0	0	0	0	0	0	0	10328000	21993000	13743000	2243100	1324500	5314200	7336100	3097500	16017000	7254600	4409100	12896000	6929500	3479100	10872000	NaN	NaN	NaN	NaN	1.5791	0.62741	0.46612	0.6081	0.9196	NaN	NaN	NaN	NaN	1.6682	2.0774	1.9682	1.5919	2.5824
M9PE40;M9MRD0;P35122	M9PE40;M9MRD0;P35122	Ubiquitin carboxyl-terminal hydrolase	Uch	tr|M9PE40|M9PE40_DROME Ubiquitin carboxyl-terminal hydrolase OS=Drosophila melanogaster OX=7227 GN=Uch PE=3 SV=1;tr|M9MRD0|M9MRD0_DROME Ubiquitin carboxyl-terminal hydrolase OS=Drosophila melanogaster OX=7227 GN=Uch PE=3 SV=1;sp|P35122|UCHL_DROME Ubiquitin	16308000	14118000	7878000	19575000	14366000	4654000	14921000	8894100	2447400	11644000	4656900	12517000	0	0	0	1028600	660340	1487700	2649700	4184500	15996000	1385500	2764500	8368600	6629600	4201200	11559000	0.83095	0.58398	0.6829	0.39803	NaN	0.61471	2.0801	2.0515	0.52985	0.38013	0.19982	0.18995	0.90205	NaN	1.5268	5.6732	5.7692	1.3937
A8JQU3;Q9VNL0	A8JQU3;Q9VNL0		Gasp	tr|A8JQU3|A8JQU3_DROME Gasp, isoform B OS=Drosophila melanogaster OX=7227 GN=Gasp PE=1 SV=1;tr|Q9VNL0|Q9VNL0_DROME Gasp, isoform A OS=Drosophila melanogaster OX=7227 GN=Gasp PE=1 SV=1	0	0	0	0	0	0	0	0	0	0	0	0	0	0	0	357240	165140	2317500	2515800	5848700	15959000	2492100	8104800	14573000	0	0	0	NaN	NaN	NaN	NaN	NaN	0.8881	1.9227	1.6094	NaN	NaN	NaN	NaN	NaN	NaN	7.7003	6.3822	5.0195	NaN
Q9VC31	Q9VC31		RabX4	tr|Q9VC31|Q9VC31_DROME RabX4 OS=Drosophila melanogaster OX=7227 GN=RabX4 PE=1 SV=2	0	0	0	0	0	0	0	0	0	11356000	3759400	19104000	9004700	3069000	18254000	0	0	0	1945400	3403300	15732000	2133200	3765900	13012000	2181700	3602500	23452000	NaN	NaN	NaN	0.34301	0.31344	NaN	1.2463	1.6675	1.7607	NaN	NaN	NaN	0.87487	2.1602	NaN	7.513	7.2563	9.4717
Q9W0S7	Q9W0S7		Tudor-SN	sp|Q9W0S7|SND1_DROME Staphylococcal nuclease domain-containing protein 1 OS=Drosophila melanogaster OX=7227 GN=Tudor-SN PE=1 SV=1	42861000	48677000	13044000	35002000	49001000	7528100	43438000	51227000	9356800	24673000	27544000	26428000	15212000	17420000	6934100	731800	550360	153340	4026900	12561000	15717000	4225800	14951000	13121000	4673300	22692000	17409000	1.2485	1.3991	1.1909	1.0742	0.94725	0.80205	3.1829	4.5775	5.1925	0.20858	0.19611	0.16623	0.25052	0.23752	0.22519	3.2243	4.8836	3.9638
Q8T0J5;Q9VE80	Q8T0J5;Q9VE80			tr|Q8T0J5|Q8T0J5_DROME GH26851p OS=Drosophila melanogaster OX=7227 GN=Dmel\CG7675 PE=1 SV=1;tr|Q9VE80|Q9VE80_DROME Uncharacterized protein, isoform B OS=Drosophila melanogaster OX=7227 GN=Dmel\CG7675 PE=1 SV=2	0	0	0	0	0	0	0	0	0	18936000	18001000	10078000	24218000	19932000	10090000	1283600	981420	459320	4779100	16346000	15671000	3837700	13672000	14706000	2571500	17084000	20009000	NaN	NaN	NaN	0.71645	0.86436	0.73487	2.85	3.0699	NaN	NaN	NaN	NaN	0.45609	0.43729	0.36846	3.1524	3.5948	5.3516
A1Z9E3	A1Z9E3	Elongation factor Tu	EfTuM	tr|A1Z9E3|A1Z9E3_DROME Elongation factor Tu OS=Drosophila melanogaster OX=7227 GN=mEFTu1 PE=1 SV=1	7583500	6054800	2132400	13535000	13804000	3398200	7992300	7317900	2615600	8762700	4675600	14017000	13334000	6989200	18743000	1527000	667370	1997700	2289300	5022000	15588000	1812900	4212200	15090000	1942500	6092100	18923000	1.0093	0.7517	0.80692	0.50999	0.45714	0.29983	1.3602	2.0813	2.2275	0.29661	0.25168	0.25629	1.4649	1.1774	0.8535	4.8567	7.818	7.3958
D1FYT3;Q9VAI6	D1FYT3;Q9VAI6	General odorant-binding protein 99b	Obp99b	tr|D1FYT3|D1FYT3_DROME GEO09079p1 OS=Drosophila melanogaster OX=7227 GN=Obp99b PE=1 SV=1;sp|Q9VAI6|OB99B_DROME General odorant-binding protein 99b OS=Drosophila melanogaster OX=7227 GN=Obp99b PE=2 SV=1	0	0	0	0	0	0	0	0	0	0	0	0	0	0	0	6763000	2368800	849400	4664300	2108200	15478000	3637000	1482500	11777000	5100900	2679200	14907000	NaN	NaN	NaN	NaN	NaN	0.59652	0.17528	0.88048	0.38187	NaN	NaN	NaN	NaN	NaN	0.16364	0.93408	3.0027	1.0882
Q9VWP2	Q9VWP2			tr|Q9VWP2|Q9VWP2_DROME RH57257p OS=Drosophila melanogaster OX=7227 GN=Dmel\CG7322 PE=1 SV=1	85229000	127130000	46301000	72745000	109010000	29826000	78005000	103840000	30609000	19312000	28874000	5613100	22256000	36661000	5661900	0	0	0	17482000	36563000	15162000	3026900	21070000	7028900	7507800	35743000	15233000	1.6517	1.5671	1.4884	1.5753	1.5728	NaN	4.593	5.4042	6.0989	0.50795	0.34458	0.45384	0.30115	0.39197	NaN	2.3553	2.6138	2.8629
A0A0C4DHG6;A0A0C4DHG2;Q07171-2;Q07171-6;Q07171	A0A0C4DHG6;A0A0C4DHG2;Q07171-2;Q07171-6;Q07171	Gelsolin	Gel	tr|A0A0C4DHG6|A0A0C4DHG6_DROME Gelsolin, isoform L OS=Drosophila melanogaster OX=7227 GN=Gel PE=4 SV=1;tr|A0A0C4DHG2|A0A0C4DHG2_DROME Gelsolin, isoform J OS=Drosophila melanogaster OX=7227 GN=Gel PE=4 SV=1;sp|Q07171-2|GELS_DROME Isoform 2 of Gelsolin OS=Dr	13332000	23198000	14971000	11031000	20094000	16183000	5109400	9247100	9916500	7135100	14111000	1958500	10502000	10722000	3453800	631330	1938900	635500	5417900	20009000	15061000	1446200	10267000	11295000	4526800	17287000	11846000	2.2426	1.6058	1.5676	2.5712	2.4113	3.0611	3.3617	6.7398	4.2414	1.0814	1.2523	0.9703	0.37694	0.18904	0.96748	2.5628	2.1011	1.8988
Q9VLL3;Q86BM5;Q9VLL3-2	Q9VLL3;Q86BM5;Q9VLL3-2		Akap200	sp|Q9VLL3|AK200_DROME A-kinase anchor protein 200 OS=Drosophila melanogaster OX=7227 GN=Akap200 PE=1 SV=3;tr|Q86BM5|Q86BM5_DROME A kinase anchor protein 200, isoform D OS=Drosophila melanogaster OX=7227 GN=Akap200 PE=1 SV=1;sp|Q9VLL3-2|AK200_DROME Isoform	5985700	14941000	3200800	14380000	24046000	2784500	12158000	14610000	1097500	11520000	10070000	4982100	8153400	8060300	2506000	12729000	9891100	4841700	9973700	14946000	14867000	9851400	13096000	14856000	11669000	21979000	18674000	2.4923	2.5681	2.0152	1.0877	0.97739	0.92504	2.831	2.8906	2.4992	0.88102	0.41606	0.17808	0.44716	0.3465	0.46349	1.6217	3.0243	2.2153
A0A0C4DHG5;P26686-3;P26686-2;P26686-5;P26686;P26686-4;P26686-6;P26686-7	A0A0C4DHG5;P26686-3;P26686-2;P26686-5;P26686	Serine-arginine protein 55	B52	tr|A0A0C4DHG5|A0A0C4DHG5_DROME B52, isoform O OS=Drosophila melanogaster OX=7227 GN=B52 PE=4 SV=1;sp|P26686-3|SRR55_DROME Isoform B of Serine-arginine protein 55 OS=Drosophila melanogaster OX=7227 GN=B52;sp|P26686-2|SRR55_DROME Isoform A of Serine-arginine	0	0	0	0	0	0	5098800	5873400	1225600	35903000	9006300	16180000	0	0	0	22104000	14792000	32065000	54636000	4110800	14836000	52150000	9449700	30076000	171870000	13029000	30759000	NaN	NaN	0.9664	0.41153	NaN	0.70035	0.099608	0.82166	0.091346	NaN	NaN	0.21907	0.66969	NaN	1.2439	0.2981	1.5455	0.20387
M9MQH9;P36179;M9NDI6;H5V8B8	M9MQH9;P36179;M9NDI6;H5V8B8	Serine/threonine-protein phosphatase PP2A 65 kDa regulatory subunit	Pp2A-29B	tr|M9MQH9|M9MQH9_DROME Protein phosphatase 2A at 29B, isoform C OS=Drosophila melanogaster OX=7227 GN=Pp2A-29B PE=1 SV=1;sp|P36179|2AAA_DROME Serine/threonine-protein phosphatase PP2A 65 kDa regulatory subunit OS=Drosophila melanogaster OX=7227 GN=Pp2A-29B	19029000	24212000	4868100	16191000	25291000	4065500	17750000	25398000	5965600	14686000	13156000	12989000	17496000	15825000	15567000	358850	161920	240140	2739400	9460200	14817000	1188300	3877500	8434200	4709900	13609000	24834000	1.3726	1.5488	1.529	0.8198	0.843	0.7842	3.366	3.7822	3.8069	0.22727	0.21708	0.26084	0.7211	0.79512	0.85349	4.808	5.5269	5.4528
Q9VTY2	Q9VTY2			tr|Q9VTY2|Q9VTY2_DROME Uncharacterized protein, isoform A OS=Drosophila melanogaster OX=7227 GN=anon-WO0172774.89 PE=1 SV=1	12948000	11693000	3255500	11029000	7732000	4253000	7924200	10800000	5441000	12988000	7590500	13891000	9898000	6143200	10943000	779080	424290	676810	2633000	5304600	14636000	1820000	4337500	10961000	2568200	7379800	21935000	0.95814	0.72795	0.89203	0.57546	0.55345	0.70665	2.6888	2.7303	3.1066	0.31787	0.38748	0.53552	0.79267	0.76791	0.93986	6.5942	6.8227	8.3031
Q7JRL9;A0A0B4KGY8	Q7JRL9;A0A0B4KGY8			tr|Q7JRL9|Q7JRL9_DROME GH25289p OS=Drosophila melanogaster OX=7227 GN=CG7237 PE=1 SV=1;tr|A0A0B4KGY8|A0A0B4KGY8_DROME Uncharacterized protein, isoform C OS=Drosophila melanogaster OX=7227 GN=CG11625 PE=1 SV=1	0	0	0	0	0	0	0	0	0	6777500	5234200	3757200	0	0	0	6074500	1829300	4246600	3073300	4099600	14617000	0	0	0	0	0	0	NaN	NaN	NaN	0.91066	NaN	0.32801	0.92924	NaN	NaN	NaN	NaN	NaN	0.72211	NaN	0.66538	4.2788	NaN	NaN
P06754-2	P06754-2	Tropomyosin-1, isoforms 9A/A/B	Tm1	sp|P06754-2|TPM1_DROME Isoform A of Tropomyosin-1, isoforms 9A/A/B OS=Drosophila melanogaster OX=7227 GN=Tm1	0	0	0	0	0	0	0	0	0	0	0	4828500	905170	113400	7167800	5474500	1690600	19986000	1520900	1186200	14527000	598910	221950	9341200	558000	261580	8542700	NaN	NaN	NaN	NaN	0.41189	0.28192	0.96731	0.84304	1.4605	NaN	NaN	NaN	NaN	3.457	3.209	7.9783	6.2305	5.5597
Q8IPT9;Q8IPU0;Q9VP68	Q8IPT9;Q8IPU0;Q9VP68		CG10512-RD	tr|Q8IPT9|Q8IPT9_DROME SD05439p1 OS=Drosophila melanogaster OX=7227 GN=Dmel\CG10512 PE=1 SV=1;tr|Q8IPU0|Q8IPU0_DROME Uncharacterized protein, isoform B OS=Drosophila melanogaster OX=7227 GN=Dmel\CG10512 PE=1 SV=1;tr|Q9VP68|Q9VP68_DROME Uncharacterized prot	122900000	110400000	36211000	106650000	109020000	24932000	116720000	112110000	24053000	19957000	20568000	21405000	20832000	21552000	21615000	595450	398130	264340	69910000	21533000	14497000	23022000	10004000	9770900	10562000	33692000	34282000	0.91132	1.1059	1.1117	1.0811	0.97149	0.84901	0.83955	1.0136	2.9864	0.26066	0.25449	0.27589	0.48358	0.70678	0.57049	0.55178	1.001	2.9969
Q0E924;A8DYI7;A8DYI6	Q0E924;A8DYI7;A8DYI6		Phb2	tr|Q0E924|Q0E924_DROME Prohibitin OS=Drosophila melanogaster OX=7227 GN=Phb2 PE=1 SV=2;tr|A8DYI7|A8DYI7_DROME Prohibitin OS=Drosophila melanogaster OX=7227 GN=Phb2 PE=1 SV=1;tr|A8DYI6|A8DYI6_DROME Prohibitin OS=Drosophila melanogaster OX=7227 GN=Phb2 PE=1	35330000	33166000	13568000	22215000	19973000	9492600	15615000	12348000	6635400	15615000	10428000	18623000	19537000	16252000	29572000	557230	390280	783100	2132800	3754900	14491000	3789900	10341000	32208000	3700000	11724000	44550000	0.94834	0.81896	1.0293	0.73501	0.95204	0.79511	1.4581	2.1666	2.9129	0.34842	0.36467	0.42275	1.0349	1.4374	1.3649	4.0046	6.5095	7.7513
Q9VG23;Q86PF4	Q9VG23;Q86PF4		CG10126-RB	tr|Q9VG23|Q9VG23_DROME GH22994p OS=Drosophila melanogaster OX=7227 GN=CT28495 PE=1 SV=2;tr|Q86PF4|Q86PF4_DROME GH08978p OS=Drosophila melanogaster OX=7227 GN=Dmel\CG10126 PE=1 SV=2	0	0	0	0	0	0	0	0	0	19241000	10956000	11546000	41947000	21527000	15681000	17480000	9551800	7721600	13795000	8525200	14426000	0	0	0	5011700	11820000	18235000	NaN	NaN	NaN	0.6139	0.61894	0.5807	0.51001	NaN	2.465	NaN	NaN	NaN	0.44758	0.36493	0.43303	0.78428	NaN	2.5862
Q9VL16	Q9VL16			tr|Q9VL16|Q9VL16_DROME RE45833p OS=Drosophila melanogaster OX=7227 GN=Fundc1 PE=2 SV=1	0	0	0	0	0	0	0	0	0	9926900	5163200	14031000	14156000	9671600	14396000	0	0	0	2078600	5493500	14425000	1990200	4680700	14681000	2282400	6391900	21295000	NaN	NaN	NaN	0.36361	0.43636	NaN	2.9619	2.2326	2.7153	NaN	NaN	NaN	1.2822	1.2529	NaN	7.5582	6.665	8.1941
Q9VGS3	Q9VGS3		SdhC	tr|Q9VGS3|Q9VGS3_DROME RH44771p OS=Drosophila melanogaster OX=7227 GN=SdhC PE=1 SV=2	0	0	0	0	0	0	0	0	0	26101000	9424100	37454000	27262000	8185500	32884000	0	0	0	2139500	3417900	14412000	1900400	3241600	10820000	2485400	3883900	14845000	NaN	NaN	NaN	0.36339	0.30031	NaN	1.6234	1.9408	1.9789	NaN	NaN	NaN	1.3181	1.093	NaN	6.0524	5.8691	6.3234
I0DHK3;P12881	I0DHK3;P12881	Proteasome subunit alpha type;Proteasome subunit alpha type-1	Prosalpha6	tr|I0DHK3|I0DHK3_DROME Proteasome subunit alpha type OS=Drosophila melanogaster OX=7227 GN=Prosalpha6 PE=2 SV=1;sp|P12881|PSA1_DROME Proteasome subunit alpha type-1 OS=Drosophila melanogaster OX=7227 GN=Prosalpha6 PE=1 SV=1	45888000	64588000	32244000	47976000	48762000	27815000	32681000	30659000	19574000	2267300	3845300	1780500	2314800	3891700	3622300	0	0	0	3239300	6638000	14299000	1478500	2796300	3938300	2922100	7667600	12109000	1.1532	1.1331	1.1703	1.218	1.3003	NaN	2.5278	2.2297	2.7819	0.32551	0.29468	0.34431	0.97053	1.1683	NaN	3.6976	2.3151	4.1038
A0A0B4LGC6;Q8MLS7;A0A0B4LG95;Q7K274	A0A0B4LGC6;Q8MLS7;A0A0B4LG95;Q7K274		l(2)k09913	tr|A0A0B4LGC6|A0A0B4LGC6_DROME Lethal (2) k09913, isoform G OS=Drosophila melanogaster OX=7227 GN=l(2)k09913 PE=1 SV=1;tr|Q8MLS7|Q8MLS7_DROME Lethal (2) k09913, isoform D OS=Drosophila melanogaster OX=7227 GN=l(2)k09913 PE=1 SV=1;tr|A0A0B4LG95|A0A0B4LG95_D	0	0	0	2206100	5530100	706860	5053000	11225000	1171600	2145300	3177800	4599500	6740900	3942900	4441000	0	0	0	4039400	6413800	14176000	918810	4093800	7990900	4349600	14956000	26193000	NaN	2.6538	1.9685	0.78274	0.68372	NaN	2.067	4.1067	5.029	NaN	0.23725	0.22724	0.9972	0.61857	NaN	3.9014	6.2644	6.2257
A1Z6Z3;A0A0B4KEE1;Q7JR61;A0A0B4KEL0;A0A0B4KF99;A4UZ69;A1Z6Z4;A0A0C4FEI5;A0A0C4DHC8	A1Z6Z3;A0A0B4KEE1;Q7JR61;A0A0B4KEL0;A0A0B4KF99;A4UZ69;A1Z6Z4;A0A0C4FEI5;A0A0C4DHC8	Aldehyde dehydrogenase	Aldh-III	tr|A1Z6Z3|A1Z6Z3_DROME Aldehyde dehydrogenase OS=Drosophila melanogaster OX=7227 GN=Aldh-III PE=1 SV=1;tr|A0A0B4KEE1|A0A0B4KEE1_DROME Aldehyde dehydrogenase OS=Drosophila melanogaster OX=7227 GN=Aldh-III PE=1 SV=1;tr|Q7JR61|Q7JR61_DROME Aldehyde dehydrogen	118380000	126710000	19561000	89646000	128690000	19046000	129940000	118860000	13985000	40708000	40382000	15433000	23119000	21257000	8587900	0	0	0	12274000	20820000	14162000	10463000	22995000	20213000	11196000	26896000	18465000	1.4024	1.6711	1.3035	1.0029	1.1937	NaN	3.8269	4.318	5.6212	0.15273	0.20425	0.12136	0.36446	0.36044	NaN	2.723	3.3692	3.5489
Q8T6I0;Q8T8W3	Q8T6I0;Q8T8W3		Past1	tr|Q8T6I0|Q8T6I0_DROME EH domain containing protein OS=Drosophila melanogaster OX=7227 GN=Past1 PE=1 SV=1;tr|Q8T8W3|Q8T8W3_DROME AT21416p OS=Drosophila melanogaster OX=7227 GN=Past1 PE=1 SV=1	46440000	39654000	20403000	40004000	31613000	14516000	52465000	46760000	21093000	13048000	10189000	12519000	10570000	8296600	10776000	222670	132710	109170	10065000	5879800	14028000	9900300	2446400	5894200	9373800	11026000	18965000	0.64124	0.75204	0.71501	0.67955	0.68773	0.53528	0.73332	0.41782	2.2904	0.36066	0.30993	0.37084	0.93635	1.1585	0.61967	0.99105	0.84852	2.5413
Q9VVA4;M9NFH8;M9PCU8	Q9VVA4;M9NFH8;M9PCU8			tr|Q9VVA4|Q9VVA4_DROME glutamate synthase (NADH) OS=Drosophila melanogaster OX=7227 GN=GS PE=1 SV=2;tr|M9NFH8|M9NFH8_DROME glutamate synthase (NADH) OS=Drosophila melanogaster OX=7227 GN=GS PE=1 SV=1;tr|M9PCU8|M9PCU8_DROME Uncharacterized protein, isoform	3458000	3916000	563550	2529200	2696900	515830	1955700	2071500	495990	20661000	11416000	10545000	21056000	12380000	10240000	608640	153670	146620	3883700	11897000	13981000	4291500	11911000	14755000	6278200	17815000	20109000	0.96716	1.195	0.98826	0.58575	0.63229	0.67223	2.7511	3.8756	3.8804	0.21641	0.29499	0.40736	0.52185	0.58607	0.4696	3.7936	4.2251	4.2709
A0A6M3Q7Q7;A0A0B4K849;A0A0B4K7A5;A8DYJ2;Q02645-4;Q02645-2;Q02645	A0A6M3Q7Q7;A0A0B4K849;A0A0B4K7A5;A8DYJ2;Q02645-4;Q02645-2;Q02645	Protein hu-li tai shao	hts	tr|A0A6M3Q7Q7|A0A6M3Q7Q7_DROME Hu li tai shao, isoform T OS=Drosophila melanogaster OX=7227 GN=hts PE=1 SV=1;tr|A0A0B4K849|A0A0B4K849_DROME Hu li tai shao, isoform O OS=Drosophila melanogaster OX=7227 GN=hts PE=1 SV=1;tr|A0A0B4K7A5|A0A0B4K7A5_DROME Hu li t	1632700	893050	510390	0	0	0	0	0	0	16793000	12049000	30519000	19096000	9373200	35889000	572630	145160	413150	1268600	2344100	13893000	879010	1273900	7801600	21484000	8960800	26751000	0.90829	0.91905	1.742	0.75281	0.52023	0.27681	1.663	1.4519	2.2804	0.48378	0.63871	0.9313	1.6664	1.8458	1.0642	5.1079	8.2334	6.5855
Q9VKR4	Q9VKR4	Aminomethyltransferase		tr|Q9VKR4|Q9VKR4_DROME Aminomethyltransferase OS=Drosophila melanogaster OX=7227 GN=Dmel\CG6415 PE=1 SV=1	63437000	71611000	16439000	103720000	131250000	21750000	86950000	92159000	21031000	35793000	38199000	5704300	23532000	26906000	3603800	2661900	3093700	535920	6527100	24989000	13796000	6349700	34572000	17338000	12117000	46680000	26435000	1.1013	1.1297	1.1043	1.1884	1.1118	1.2553	3.4987	4.7903	4.0067	0.22595	0.18522	0.20771	0.17563	0.13782	0.21976	2.268	2.4092	2.163
Q9VQL1	Q9VQL1			tr|Q9VQL1|Q9VQL1_DROME serine--tRNA ligase OS=Drosophila melanogaster OX=7227 GN=SerRS PE=1 SV=1	19045000	17651000	5785800	22161000	20722000	4896900	12235000	13371000	3590200	7554200	7788100	6642500	5088900	7105700	3929100	626690	583850	572940	2918300	10816000	13710000	1685400	6804100	10504000	693540	10428000	10768000	0.74517	0.83165	1.1157	0.6847	1.274	0.99167	3.1358	3.0582	3.6725	0.19682	0.22491	0.25729	0.54621	0.65687	0.93389	3.5698	4.4844	5.5991
A0A0B4KF46;Q8T0L3	A0A0B4KF46;Q8T0L3		Uba1	tr|A0A0B4KF46|A0A0B4KF46_DROME E1 ubiquitin-activating enzyme OS=Drosophila melanogaster OX=7227 GN=Uba1 PE=1 SV=1;tr|Q8T0L3|Q8T0L3_DROME E1 ubiquitin-activating enzyme OS=Drosophila melanogaster OX=7227 GN=Uba1 PE=1 SV=1	15658000	11003000	3687000	11396000	10093000	2292100	11483000	9911200	3385000	7831400	5300300	7105500	11290000	7196200	9507900	201580	67867	176860	1697900	3564900	13492000	2134800	4470400	13086000	1687000	5679700	11963000	0.80847	0.94617	0.83398	0.79267	0.7269	0.58483	2.2344	2.4611	2.5456	0.21698	0.28203	0.28722	0.91659	0.80751	0.87028	4.5265	3.4018	5.2162
Q9VGF1;Q9VGF2	Q9VGF1;Q9VGF2		CG12224-RA	tr|Q9VGF1|Q9VGF1_DROME GH17980p OS=Drosophila melanogaster OX=7227 GN=Dmel\CG3397 PE=1 SV=1;tr|Q9VGF2|Q9VGF2_DROME NADP-dependent oxidoreductase domain-containing protein OS=Drosophila melanogaster OX=7227 GN=Dmel\CG12224 PE=4 SV=3	46688000	27596000	12865000	106530000	84139000	25698000	112320000	90879000	31356000	19763000	18844000	4310200	31564000	29807000	9311400	289890	653810	147230	6793100	24412000	13479000	6711400	23691000	14658000	7174300	30750000	17797000	0.59585	0.74456	0.75311	0.83741	1.1143	1.3038	3.503	3.4343	3.9794	0.26313	0.26229	0.27864	0.27316	0.3368	NaN	2.2102	2.3441	2.376
Q8STG9	Q8STG9		Sec61alpha	tr|Q8STG9|Q8STG9_DROME DSec61alpha OS=Drosophila melanogaster OX=7227 GN=Sec61alpha PE=1 SV=1	74071000	66795000	68067000	53366000	73480000	12771000	38142000	44767000	7814900	38420000	34977000	7825500	52925000	63021000	17960000	2413900	3226400	709000	5880400	13712000	13369000	4533100	25015000	16492000	9435500	38366000	32071000	1.4257	1.5991	1.2666	0.99021	1.4737	1.3747	3.0408	4.905	4.0964	0.43839	0.25831	0.22457	0.22878	0.19014	0.24536	2.4971	3.4325	3.0365
Q9VDC3	Q9VDC3		AP-2sigma	tr|Q9VDC3|Q9VDC3_DROME AP complex subunit sigma OS=Drosophila melanogaster OX=7227 GN=AP-2sigma PE=1 SV=1	0	0	0	0	0	0	0	0	0	11931000	3852400	15471000	0	0	0	0	0	0	8596200	2837800	13232000	10355000	3502400	17866000	12035000	6816300	28237000	NaN	NaN	NaN	0.15442	NaN	NaN	0.26809	0.42608	0.88114	NaN	NaN	NaN	0.95632	NaN	NaN	1.2926	1.5195	2.0792
Q7KVX5;Q9W4N8	Q7KVX5;Q9W4N8		Vap-33A	tr|Q7KVX5|Q7KVX5_DROME VAMP-associated protein 33kDa, isoform A OS=Drosophila melanogaster OX=7227 GN=Vap33 PE=1 SV=1;tr|Q9W4N8|Q9W4N8_DROME LD30122p OS=Drosophila melanogaster OX=7227 GN=Vap33 PE=1 SV=1	0	0	0	6599600	5618500	1295500	6499800	4553200	1688000	10798000	4810300	10181000	20014000	11262000	24676000	0	0	0	2085900	3518900	13217000	0	0	0	3383500	7891600	21821000	NaN	0.99515	0.87089	0.50515	0.49991	NaN	1.772	NaN	1.9108	NaN	0.21626	0.33073	0.96299	1.1075	NaN	6.0254	NaN	5.5513
Q9W3N1	Q9W3N1			tr|Q9W3N1|Q9W3N1_DROME RH59310p OS=Drosophila melanogaster OX=7227 GN=spidey PE=1 SV=1	302570000	476630000	58366000	430690000	685030000	74214000	308660000	492350000	54037000	3189100	1866200	3178700	11607000	17216000	8716300	0	0	0	4071500	12857000	13054000	1537200	5129300	4757200	0	0	0	1.4145	1.2778	1.4092	0.70167	1.8025	NaN	3.2542	2.6724	NaN	0.16218	0.13603	0.16251	1.5318	0.83132	NaN	2.8217	2.4874	NaN
B4F5U4;Q9VYY2	B4F5U4;Q9VYY2	Signal peptidase complex subunit 2	Spase25	tr|B4F5U4|B4F5U4_DROME Signal peptidase complex subunit 2 OS=Drosophila melanogaster OX=7227 GN=Spase25 PE=1 SV=1;sp|Q9VYY2|SPCS2_DROME Signal peptidase complex subunit 2 OS=Drosophila melanogaster OX=7227 GN=Spase25 PE=2 SV=1	11687000	16894000	2255400	12918000	14690000	1438700	8542100	13320000	1329700	10877000	10075000	3827100	3770300	4649000	2087200	0	0	0	9329800	11668000	13027000	0	0	0	577720	5460500	3770200	1.6045	1.0903	1.7115	1.0084	1.2364	NaN	0.86744	NaN	5.4052	0.18525	0.15312	0.18738	0.3623	0.57248	NaN	0.81342	NaN	4.1761
Q9VL18;Q9VL18-2	Q9VL18;Q9VL18-2	Probable elongation factor 1-delta	eEF1delta	sp|Q9VL18|EF1D_DROME Probable elongation factor 1-delta OS=Drosophila melanogaster OX=7227 GN=eEF1delta PE=1 SV=1;sp|Q9VL18-2|EF1D_DROME Isoform A of Probable elongation factor 1-delta OS=Drosophila melanogaster OX=7227 GN=eEF1delta	56118000	136250000	13214000	37468000	122990000	16674000	34738000	107790000	9489800	34788000	59155000	12361000	19704000	33844000	7863400	2385200	4423300	816960	5862700	23506000	12873000	3250000	12704000	5978200	8871100	48387000	24544000	2.3814	2.8139	2.8203	1.8252	1.7801	1.8573	4.0193	3.3541	3.7188	0.15554	0.2828	0.16201	0.44833	0.31383	0.35597	2.162	1.7548	2.5649
Q9VZG2	Q9VZG2		Cpr64Aa	tr|Q9VZG2|Q9VZG2_DROME Cuticular protein 64Aa OS=Drosophila melanogaster OX=7227 GN=Cpr64Aa PE=2 SV=1	0	0	0	0	0	0	0	0	0	0	0	35063000	0	0	0	0	0	0	0	0	12841000	0	0	0	0	0	0	NaN	NaN	NaN	NaN	NaN	NaN	NaN	NaN	NaN	NaN	NaN	NaN	NaN	NaN	NaN	NaN	NaN	NaN
E2QCZ0;E2QCY9;Q24546;Q24546-3	E2QCZ0;E2QCY9;Q24546;Q24546-3	Synapsin;Synapsin-1;Synapsin-2	Syn	tr|E2QCZ0|E2QCZ0_DROME Synapsin, isoform E OS=Drosophila melanogaster OX=7227 GN=Syn PE=1 SV=1;tr|E2QCY9|E2QCY9_DROME Synapsin, isoform D OS=Drosophila melanogaster OX=7227 GN=Syn PE=1 SV=1;sp|Q24546|SYN_DROME Synapsin OS=Drosophila melanogaster OX=7227 GN	0	0	0	0	0	0	0	0	0	6008100	1740000	16375000	5218600	1222400	12086000	0	0	0	2688900	1904900	12760000	685340	934980	6585500	0	0	0	NaN	NaN	NaN	0.15235	0.23848	NaN	1.3521	1.3284	NaN	NaN	NaN	NaN	2.4626	1.9405	NaN	6.9175	11.289	NaN
Q9VJ59	Q9VJ59		Jwa	tr|Q9VJ59|Q9VJ59_DROME PRA1 family protein OS=Drosophila melanogaster OX=7227 GN=Jwa PE=1 SV=6	7644300	23266000	2499400	8769700	18451000	8150900	6045000	13981000	2331500	16774000	16665000	10658000	15436000	14417000	10960000	0	0	0	3433600	9182300	12736000	3266100	10463000	13509000	4244200	14965000	17545000	2.8744	2.2748	1.9265	0.94856	0.92773	NaN	3.2224	2.8269	3.5006	0.37888	NaN	0.45794	0.50046	0.67307	NaN	3.6717	3.0299	3.4692
Q8T0T9	Q8T0T9		BEST:CK00246	tr|Q8T0T9|Q8T0T9_DROME Novel acetylcholine receptor chaperone OS=Drosophila melanogaster OX=7227 GN=BEST:CK00246 PE=1 SV=1	2957400	329870	4139000	0	0	0	2847300	557450	3066400	7073700	1753600	16241000	12357000	2542100	27371000	419420	135400	759750	1677700	1067500	12491000	1838000	1412600	15075000	2024800	1972600	23629000	0.1858	NaN	0.21495	0.18353	0.21108	0.342	0.90344	0.94187	1.2032	1.4106	NaN	0.93913	1.968	1.9923	1.8423	7.4852	9.196	9.443
A4V3W2;A4V3W1;Q0KHW6;A8JUV9;M9PGC4;M9PGV7;P18431-4;P18431;P18431-3;P18431-1;Q7KVY5;C0PUX5	A4V3W2;A4V3W1;Q0KHW6;A8JUV9;M9PGC4;M9PGV7;P18431-4;P18431;P18431-3;P18431-1;Q7KVY5;C0PUX5	Protein kinase shaggy	sgg	tr|A4V3W2|A4V3W2_DROME Shaggy, isoform C OS=Drosophila melanogaster OX=7227 GN=sgg PE=1 SV=1;tr|A4V3W1|A4V3W1_DROME Shaggy, isoform J OS=Drosophila melanogaster OX=7227 GN=sgg PE=1 SV=1;tr|Q0KHW6|Q0KHW6_DROME Shaggy, isoform R OS=Drosophila melanogaster OX	0	0	0	0	0	0	0	0	0	3162700	2222800	5571300	5297000	3828800	4367800	0	0	0	1623900	4938000	12484000	745390	1779900	6309800	370520	2472900	4499100	NaN	NaN	NaN	0.54189	0.785	NaN	3.5688	2.4626	3.099	NaN	NaN	NaN	1.2078	0.9109	NaN	7.3633	8.2365	6.6671
O62530	O62530		AP-2mu	tr|O62530|O62530_DROME Adaptor protein complex 2, mu subunit, isoform A OS=Drosophila melanogaster OX=7227 GN=AP-2mu PE=1 SV=1	0	0	0	0	0	0	0	0	0	1355200	517470	3061400	732190	342110	1687100	0	0	0	2483100	2274500	12480000	1288300	3276400	10115000	845360	1867200	8489000	NaN	NaN	NaN	0.34218	0.36471	NaN	1.4763	2.2184	1.658	NaN	NaN	NaN	2.2002	1.6618	NaN	6.2439	8.2183	7.2697
Q9VUC1;M9MSL3	Q9VUC1;M9MSL3		Hsc70Cb	tr|Q9VUC1|Q9VUC1_DROME Hsc70Cb, isoform A OS=Drosophila melanogaster OX=7227 GN=Hsp110 PE=1 SV=1;tr|M9MSL3|M9MSL3_DROME Hsc70Cb, isoform G OS=Drosophila melanogaster OX=7227 GN=Hsp110 PE=1 SV=1	19277000	37706000	6285600	30468000	45706000	7729800	19396000	33079000	5533800	6772000	5772400	4030200	9592600	7687700	6138900	0	0	0	2451400	8693200	12457000	2398700	7851000	13459000	1606200	4457400	7880000	1.6468	1.8182	1.8232	0.92372	0.83198	NaN	3.0036	3.2505	2.8842	0.43811	0.43137	0.28557	0.67229	0.79068	NaN	4.8621	4.7589	4.5572
A0AVW1;A0A0B4LGM0;B7YZQ3;Q8MLN9	A0AVW1;A0A0B4LGM0;B7YZQ3;Q8MLN9		prom	tr|A0AVW1|A0AVW1_DROME IP13255p OS=Drosophila melanogaster OX=7227 GN=prom PE=1 SV=1;tr|A0A0B4LGM0|A0A0B4LGM0_DROME Prominin, isoform E OS=Drosophila melanogaster OX=7227 GN=prom PE=1 SV=1;tr|B7YZQ3|B7YZQ3_DROME Prominin, isoform D OS=Drosophila melanogast	6062100	5860600	450200	0	0	0	0	0	0	2211000	1642800	6304400	996740	177900	5325900	90155	202850	232280	4938300	5955300	12436000	1555400	1154500	7372400	2116000	1491500	2796400	0.80685	NaN	NaN	0.43034	0.46305	2.973	0.99961	0.53257	0.53597	0.13851	NaN	NaN	3.4516	3.7639	2.9473	11.077	3.214	1.2072
Q9VNX1	Q9VNX1		DNApol-eta	sp|Q9VNX1|POLH_DROME DNA polymerase eta OS=Drosophila melanogaster OX=7227 GN=PolH PE=1 SV=1	5431100	4571800	2329000	6993300	4473700	1774900	5004400	4137000	1829600	6477200	1982300	10630000	6795100	2094300	14224000	0	0	3238100	1953400	2173800	12339000	3207900	5662600	25850000	1603900	2078000	9275100	0.77513	0.72172	0.7779	0.33541	0.27872	NaN	1.2198	1.4054	1.4035	0.36106	0.25174	0.34623	1.6829	2.2513	NaN	7.0121	7.3815	7.8981
A0A0B4JCZ4;A0A126GV04;Q24547	A0A0B4JCZ4;A0A126GV04;Q24547	Syntaxin-1A	Syx1A	tr|A0A0B4JCZ4|A0A0B4JCZ4_DROME Syntaxin 1A, isoform B OS=Drosophila melanogaster OX=7227 GN=Syx1A PE=3 SV=1;tr|A0A126GV04|A0A126GV04_DROME Syntaxin 1A, isoform C OS=Drosophila melanogaster OX=7227 GN=Syx1A PE=3 SV=1;sp|Q24547|STX1A_DROME Syntaxin-1A OS=Dro	0	0	0	0	0	0	0	0	0	0	0	0	1582500	274240	6102700	0	0	0	1463500	1291200	12220000	2011600	1478300	8535400	0	0	5783900	NaN	NaN	NaN	NaN	0.58513	NaN	0.60141	0.71109	NaN	NaN	NaN	NaN	NaN	3.0115	NaN	4.1944	4.4217	NaN
Q9U616	Q9U616	Glycine cleavage system H protein, mitochondrial	ppl	sp|Q9U616|GCSH_DROME Glycine cleavage system H protein, mitochondrial OS=Drosophila melanogaster OX=7227 GN=ppl PE=2 SV=1	37255000	34367000	29590000	76667000	80513000	35769000	174550000	159110000	47198000	19217000	22038000	5402700	34961000	36139000	17959000	24701000	28490000	11975000	5822600	16697000	12141000	0	0	0	5463200	23159000	17441000	0.86562	1.007	0.897	0.94758	1.0569	1.1213	3.0212	NaN	4.0998	0.6003	0.60813	0.2716	0.29684	0.32364	0.38413	2.2236	NaN	2.9807
Q9W0E4;Q8IRH0;Q8IRH1	Q9W0E4;Q8IRH0;Q8IRH1		Psa	tr|Q9W0E4|Q9W0E4_DROME Aminopeptidase OS=Drosophila melanogaster OX=7227 GN=Psa PE=1 SV=1;tr|Q8IRH0|Q8IRH0_DROME LP21249p OS=Drosophila melanogaster OX=7227 GN=Psa PE=1 SV=1;tr|Q8IRH1|Q8IRH1_DROME FI19310p1 OS=Drosophila melanogaster OX=7227 GN=Psa PE=1 SV	27852000	31701000	10770000	19110000	23086000	4944600	22158000	23706000	5298700	3400300	2201200	4313900	2743500	1869600	4146300	0	0	0	3102100	5582700	12108000	301490	1318700	3327600	1608500	3157100	7922200	1.0132	0.99734	0.87841	0.75243	0.73522	NaN	2.5366	3.6087	2.0203	0.30394	0.23618	0.23283	1.3112	1.3528	NaN	4.7054	9.1094	4.343
Q9VPX7;Q9VPX6	Q9VPX7;Q9VPX6	Adenylyl cyclase-associated protein	capt	tr|Q9VPX7|Q9VPX7_DROME Capulet, isoform A OS=Drosophila melanogaster OX=7227 GN=capt PE=1 SV=2;tr|Q9VPX6|Q9VPX6_DROME Adenylyl cyclase-associated protein OS=Drosophila melanogaster OX=7227 GN=capt PE=1 SV=2	0	0	0	328980	147360	148320	0	0	0	287530	111840	403220	6979200	3121900	11066000	0	0	0	1514400	2525700	12043000	272810	929390	3947500	820710	1393600	4723700	NaN	1.2713	NaN	0.42681	0.48967	NaN	0.94757	1.9467	1.6694	NaN	0.55316	NaN	1.1862	1.3112	NaN	2.7786	6.6522	4.5982
Q9Y143	Q9Y143		CG5867-RA	tr|Q9Y143|Q9Y143_DROME BcDNA.GH05536 OS=Drosophila melanogaster OX=7227 GN=Jhbp14 PE=1 SV=1	0	0	0	0	0	0	0	0	0	48248000	29618000	9260700	14651000	29477000	10658000	1086200	2155100	7968400	6381300	28138000	11889000	4730600	19972000	12783000	27979000	43890000	20600000	NaN	NaN	NaN	1.7366	2.0132	1.4891	4.7487	4.1749	5.4468	NaN	NaN	NaN	0.48548	0.5815	2.1363	2.3971	2.6627	2.8449
Q7JV23;A8DY67;A1Z784	Q7JV23;A8DY67;A1Z784		ACC	tr|Q7JV23|Q7JV23_DROME Acetyl-CoA carboxylase, isoform B OS=Drosophila melanogaster OX=7227 GN=ACC PE=1 SV=1;tr|A8DY67|A8DY67_DROME Acetyl-CoA carboxylase, isoform E OS=Drosophila melanogaster OX=7227 GN=ACC PE=1 SV=2;tr|A1Z784|A1Z784_DROME Acetyl-CoA carb	209880000	388140000	46399000	229120000	441990000	45308000	235170000	422350000	47514000	24070000	55088000	6600300	22143000	52435000	5826700	433360	869180	227770	6881000	31403000	11429000	5214100	31611000	11431000	8784900	59169000	20300000	1.7897	1.832	1.6676	1.8938	2.5108	0.98231	5.9332	8.0563	7.2505	0.12581	0.1333	0.14416	0.18377	0.20469	0.68047	1.8057	2.6685	2.3397
P46415	P46415	Alcohol dehydrogenase class-3	Fdh	sp|P46415|ADHX_DROME Alcohol dehydrogenase class-3 OS=Drosophila melanogaster OX=7227 GN=Fdh PE=1 SV=3	51676000	46132000	18133000	73266000	71562000	24270000	63675000	59605000	19323000	21733000	19242000	8583100	13951000	13250000	5878600	0	0	0	2858000	11151000	11379000	3335300	12472000	14177000	4138800	20597000	21667000	0.89066	1.2296	1.0249	1.0403	1.0408	NaN	3.8761	3.5101	3.8132	0.42082	0.34543	0.27135	0.33785	0.41645	NaN	4.2375	3.9951	4.1579
Q9VD29	Q9VD29		Sar1	tr|Q9VD29|Q9VD29_DROME RE74312p OS=Drosophila melanogaster OX=7227 GN=Sar1 PE=1 SV=1	36844000	60923000	6842800	32279000	52242000	5718900	28441000	62011000	6042500	12292000	23118000	10002000	12254000	16545000	8371400	476600	757290	247870	2568200	12505000	11255000	2886000	12239000	13169000	4096600	28559000	20592000	1.6261	1.5399	2.2973	1.1706	1.3706	1.28	4.092	3.9866	4.4567	0.21351	0.1206	0.11559	0.36365	0.5665	0.53133	4.0134	4.0553	4.0155
Q9VEY5	Q9VEY5			tr|Q9VEY5|Q9VEY5_DROME MICOS complex subunit OS=Drosophila melanogaster OX=7227 GN=Mic26-27 PE=1 SV=1	5848700	3972400	1699000	15255000	12346000	4440400	10449000	10271000	2882100	7130900	2906200	11732000	9429300	3525600	15042000	0	0	0	1759000	1911700	11254000	1688800	2762700	11697000	3061800	5482100	24136000	0.67913	0.86699	0.85636	0.38678	0.45122	NaN	1.1624	1.257	1.4877	0.19289	0.31561	0.3303	1.3921	1.4441	NaN	4.8089	6.4353	5.7951
Q9VXQ5	Q9VXQ5		Tcp-1zeta	tr|Q9VXQ5|Q9VXQ5_DROME T-complex protein 1 subunit zeta OS=Drosophila melanogaster OX=7227 GN=CCT6 PE=1 SV=1	4100700	4218400	933600	12498000	13718000	3348000	6671800	7176900	1526100	2778800	2222500	1476800	746080	592260	605910	452370	389590	209210	19685000	4562900	11127000	5774700	1725600	3673300	543810	1687500	3936500	1.1077	1.1254	1.0854	0.85566	0.90627	0.8513	1.3396	0.35911	2.8088	0.19575	0.18648	0.27548	0.59911	0.62711	0.55472	2.329	0.73358	4.6984
Q9VAC4	Q9VAC4		Nph	tr|Q9VAC4|Q9VAC4_DROME GEO09167p1 OS=Drosophila melanogaster OX=7227 GN=Nph PE=1 SV=1	0	0	0	8916900	17886000	840970	11165000	19732000	0	9607000	9460600	4062200	8542800	13203000	6590500	12468000	11695000	12303000	1732200	5923400	11116000	0	0	0	0	7326300	13229000	NaN	2.569	2.1674	1.2305	1.3365	0.96516	4.123	NaN	NaN	NaN	NaN	NaN	0.42309	0.61187	1.003	7.2016	NaN	NaN
Q9V521;Q9W1V6	Q9V521	Phenoloxidase 2	PPO2	sp|Q9V521|PPO2_DROME Phenoloxidase 2 OS=Drosophila melanogaster OX=7227 GN=PPO2 PE=1 SV=1	31912000	13908000	13507000	23902000	10446000	6702100	24099000	7183300	10027000	24069000	8615600	7306000	30503000	12368000	11114000	2680300	1235300	1750200	5469700	23423000	11087000	8440800	34161000	17025000	16788000	39495000	23209000	0.38384	0.42526	0.31069	0.40437	0.39759	0.51795	5.0275	3.7599	4.6462	0.27803	0.32166	0.34961	0.36135	0.32442	0.45586	2.9184	2.5267	2.8396
Q9W3N9	Q9W3N9			tr|Q9W3N9|Q9W3N9_DROME LD24105p OS=Drosophila melanogaster OX=7227 GN=Acat1 PE=1 SV=1	27229000	57055000	8256900	10046000	15027000	2704800	10486000	15017000	3385200	13345000	14747000	6711700	22704000	19885000	11113000	1213100	1593700	635030	2821200	10586000	10987000	1339600	7815600	6772000	2606100	14346000	11809000	1.3073	1.2412	1.3528	1.0403	0.89645	1.5166	3.45	4.8012	4.1225	0.35338	0.2237	0.2798	0.51994	0.39843	0.52836	3.0677	3.9395	5.646
Q9W258	Q9W258		babos	tr|Q9W258|Q9W258_DROME Babos, isoform A OS=Drosophila melanogaster OX=7227 GN=babos PE=2 SV=2	0	0	0	5091900	15712000	2974600	4215500	13558000	1818000	0	0	0	0	0	0	0	0	0	1683700	7738300	10979000	0	0	0	1087700	9315000	11184000	NaN	2.7514	2.6569	NaN	NaN	NaN	2.5775	NaN	4.268	NaN	0.61249	0.36531	NaN	NaN	NaN	4.2409	NaN	4.5564
Q8SZK9	Q8SZK9		Clect27	tr|Q8SZK9|Q8SZK9_DROME HL04814p OS=Drosophila melanogaster OX=7227 GN=slf PE=1 SV=1	0	0	0	0	0	0	0	0	0	0	0	0	4246700	3236000	6850500	0	0	0	1374700	3152100	10847000	764980	6092800	10502000	272790	1090600	4403800	NaN	NaN	NaN	NaN	0.76681	NaN	2.8066	8.9295	3.4386	NaN	NaN	NaN	NaN	1.3761	NaN	7.4254	8.9638	10.53
O96607;Q9VM94;M9PB54;M9PEX1;Q0E8S7	O96607;Q9VM94;M9PB54;M9PEX1;Q0E8S7		homer	tr|O96607|O96607_DROME Homer OS=Drosophila melanogaster OX=7227 GN=homer PE=1 SV=1;tr|Q9VM94|Q9VM94_DROME Homer, isoform B OS=Drosophila melanogaster OX=7227 GN=homer PE=1 SV=1;tr|M9PB54|M9PB54_DROME Homer, isoform F OS=Drosophila melanogaster OX=7227 GN=h	0	0	0	0	0	0	0	0	0	5727300	2598400	13258000	8646400	5584500	26432000	437260	58236	1048800	3509100	2007100	10812000	5205300	2176600	15320000	8625200	7554100	39526000	NaN	NaN	NaN	0.56302	0.4606	0.23882	0.94539	0.52286	0.85094	NaN	NaN	NaN	1.8684	1.2586	1.886	4.1822	2.6064	3.3133
Q9VAK5	Q9VAK5		ND-20L	tr|Q9VAK5|Q9VAK5_DROME NADH dehydrogenase (Ubiquinone) 20 kDa subunit-like, isoform A OS=Drosophila melanogaster OX=7227 GN=ND-20L PE=3 SV=1	0	0	0	0	0	0	0	0	0	0	0	0	0	0	0	0	0	0	1947600	2625300	10811000	0	0	0	1448200	2017700	9671800	NaN	NaN	NaN	NaN	NaN	NaN	1.1658	NaN	1.7617	NaN	NaN	NaN	NaN	NaN	NaN	5.047	NaN	6.5134
Q9W3R8	Q9W3R8			tr|Q9W3R8|Q9W3R8_DROME sn-1-specific diacylglycerol lipase ABHD11 OS=Drosophila melanogaster OX=7227 GN=Dmel\CG2059 PE=1 SV=1	21549000	15242000	5247900	11234000	8199800	2726300	11951000	10531000	3084800	8418900	4603100	8621500	6603100	5383300	7065500	0	0	0	1975900	4860300	10709000	1345200	3965700	8990500	2079600	5392000	10244000	0.67113	0.84154	0.9066	0.61481	0.64275	NaN	2.5339	3.247	3.2023	NaN	0.2583	0.2581	0.97713	0.80217	NaN	4.8273	5.7406	5.8621
M9PB90;Q9VKY2	M9PB90;Q9VKY2	Cullin-associated NEDD8-dissociated protein 1	Cand1	tr|M9PB90|M9PB90_DROME Cullin-associated and neddylation-dissociated 1, isoform B OS=Drosophila melanogaster OX=7227 GN=Cand1 PE=1 SV=1;sp|Q9VKY2|CAND1_DROME Cullin-associated NEDD8-dissociated protein 1 OS=Drosophila melanogaster OX=7227 GN=Cand1 PE=2 SV=	9027400	19951000	982090	7390900	21625000	994610	438010	156140	35666	12823000	26546000	1995700	10690000	29633000	1814500	0	0	0	2746300	18641000	10680000	3472600	30793000	11405000	5331500	37869000	12425000	2.2698	2.5272	0.78479	1.9421	1.7447	NaN	7.1242	7.8722	1.7275	0.10707	0.13077	0.10417	0.25079	0.3236	NaN	2.6399	2.3493	1.0837
Q9VXM4	Q9VXM4		MSBP	tr|Q9VXM4|Q9VXM4_DROME LD12946p OS=Drosophila melanogaster OX=7227 GN=MSBP PE=1 SV=1	67300000	87126000	18105000	69709000	99472000	14932000	77346000	95897000	11772000	13217000	13877000	5301400	11715000	15034000	6255200	857420	429290	80736	4889400	10762000	10596000	752870	3322700	1978000	1353400	5927700	4134500	1.5898	1.429	1.2675	0.96526	1.0952	0.38749	2.3651	5.2182	3.7466	0.21738	0.20316	0.14873	0.41492	0.88334	NaN	2.1869	3.0037	2.0971
A4V2B8;P08181	A4V2B8;P08181	Casein kinase II subunit alpha	CkIIalpha	tr|A4V2B8|A4V2B8_DROME Casein kinase IIalpha, isoform C OS=Drosophila melanogaster OX=7227 GN=CkIIalpha PE=1 SV=1;sp|P08181|CSK2A_DROME Casein kinase II subunit alpha OS=Drosophila melanogaster OX=7227 GN=CkIIalpha PE=1 SV=2	10113000	10774000	6319000	13359000	17408000	10156000	18289000	19855000	6296300	12649000	8773300	10939000	5795900	4099900	6796800	0	0	0	1634000	3416800	10573000	2646700	7323300	17998000	4700800	10941000	31266000	1.0737	1.1578	1.1622	0.76433	0.62205	NaN	2.093	2.4634	2.9106	0.81461	0.38609	0.59697	0.8796	0.92243	NaN	5.3701	6.5512	7.4257
Q8SXR1;M9PBN2	Q8SXR1;M9PBN2		NLaz	tr|Q8SXR1|Q8SXR1_DROME Neural lazarillo, isoform A OS=Drosophila melanogaster OX=7227 GN=NLaz PE=1 SV=1;tr|M9PBN2|M9PBN2_DROME Neural lazarillo, isoform B OS=Drosophila melanogaster OX=7227 GN=NLaz PE=1 SV=1	0	0	0	0	0	0	0	0	0	0	0	0	0	0	0	0	0	0	2335100	4745800	10557000	0	0	0	0	0	0	NaN	NaN	NaN	NaN	NaN	NaN	1.7041	NaN	NaN	NaN	NaN	NaN	NaN	NaN	NaN	4.2287	NaN	NaN
Q9VBS7	Q9VBS7			tr|Q9VBS7|Q9VBS7_DROME Uncharacterized protein, isoform B OS=Drosophila melanogaster OX=7227 GN=Dmel\CG10550 PE=1 SV=1	0	0	0	0	0	0	0	0	0	15605000	15918000	3569300	33430000	29738000	7072400	0	0	0	4485300	15404000	10508000	3572100	11090000	7431400	5552800	25541000	18490000	NaN	NaN	NaN	0.99896	0.981	NaN	3.0655	3.5355	4.1546	NaN	NaN	NaN	0.21998	0.2356	NaN	2.1203	2.4929	2.8909
Q24253	Q24253	AP complex subunit beta	AP-1-2beta	tr|Q24253|Q24253_DROME AP complex subunit beta OS=Drosophila melanogaster OX=7227 GN=AP-1-2beta PE=1 SV=1	3053500	1890600	833750	1410100	1327600	480530	1620300	784460	260520	3170400	1146900	8282200	3764100	1843100	7742200	0	0	0	1555800	1849600	10496000	3105400	3186200	12786000	2089000	10161000	18451000	0.63132	0.71401	0.64388	0.52341	0.64672	NaN	0.97043	0.82138	2.1729	0.27956	0.20243	0.30691	1.697	2.2676	NaN	4.3569	3.5144	8.117
Q09103-3;A0A023GPM5;M9MSN3;M9MS31;M9PH20;M9PHG3;Q09103-2;Q09103;X2JE67;X2JEJ9;A0A6H2EFG8	Q09103-3;A0A023GPM5;M9MSN3;M9MS31;M9PH20;M9PHG3;Q09103-2;Q09103;X2JE67;X2JEJ9;A0A6H2EFG8	Eye-specific diacylglycerol kinase;Diacylglycerol kinase	rdgA	sp|Q09103-3|DGK2_DROME Isoform B of Eye-specific diacylglycerol kinase OS=Drosophila melanogaster OX=7227 GN=rdgA;tr|A0A023GPM5|A0A023GPM5_DROME Diacylglycerol kinase OS=Drosophila melanogaster OX=7227 GN=rdgA PE=3 SV=1;tr|M9MSN3|M9MSN3_DROME Diacylglycero	0	0	0	0	0	0	0	0	0	5164300	1378600	7237800	1449100	294740	2633100	0	0	0	1423900	2300100	10400000	1206500	1865400	8985400	1470800	1587100	8664100	NaN	NaN	NaN	0.34734	0.29559	NaN	1.5267	1.9147	2.3618	NaN	NaN	NaN	1.2304	1.3368	NaN	6.3737	6.3314	5.3067
O76268;Q9VQI8;M9PBV2;Q8IPZ6	O76268;Q9VQI8;M9PBV2;Q8IPZ6		NTPase	tr|O76268|O76268_DROME LD11641p OS=Drosophila melanogaster OX=7227 GN=NTPase PE=1 SV=1;tr|Q9VQI8|Q9VQI8_DROME FI18627p1 OS=Drosophila melanogaster OX=7227 GN=NTPase PE=1 SV=1;tr|M9PBV2|M9PBV2_DROME NTPase, isoform F OS=Drosophila melanogaster OX=7227 GN=NT	0	0	0	0	0	0	6195200	6233800	970390	10730000	9103900	4252000	6774000	4622200	2073900	0	0	0	27067000	10631000	10375000	28997000	8340200	8271200	45195000	15539000	13725000	NaN	NaN	1.0332	0.61239	0.55258	NaN	0.59456	0.3522	0.45449	NaN	NaN	0.16595	0.39111	0.18924	NaN	0.55841	0.39586	0.40938
A1ZAH8;Q7JZW2	A1ZAH8;Q7JZW2		RpS15	tr|A1ZAH8|A1ZAH8_DROME Small ribosomal subunit protein uS19 OS=Drosophila melanogaster OX=7227 GN=RpS15 PE=1 SV=1;tr|Q7JZW2|Q7JZW2_DROME Small ribosomal subunit protein uS19 OS=Drosophila melanogaster OX=7227 GN=RpS15 PE=1 SV=1	81842000	96731000	28029000	59529000	100860000	24691000	16384000	18691000	4834100	31257000	30952000	16746000	9629300	8071200	11713000	1778900	1554300	1213400	3035900	6912700	10323000	0	0	0	0	0	0	1.1572	1.2183	1.0477	0.90011	0.90334	0.76778	1.6417	NaN	NaN	0.30437	0.31024	0.25849	0.387	0.80043	0.57255	1.8656	NaN	NaN
O46231;E1JJ21;Q9VA56;Q9VA58;C7LAH8;A0A0B4KHF2;Q9VA59;A0A0B4K7R6;A0A0B4KHW6;A8JRH3;A0A6H2EEH6;A0A0B4K6N4	O46231;E1JJ21;Q9VA56;Q9VA58;C7LAH8;A0A0B4KHF2;Q9VA59;A0A0B4K7R6;A0A0B4KHW6;A8JRH3;A0A6H2EEH6;A0A0B4K6N4		tmod;tmod-RC	tr|O46231|O46231_DROME FI18705p1 OS=Drosophila melanogaster OX=7227 GN=tmod PE=1 SV=1;tr|E1JJ21|E1JJ21_DROME Tropomodulin, isoform H OS=Drosophila melanogaster OX=7227 GN=tmod PE=1 SV=1;tr|Q9VA56|Q9VA56_DROME GH23271p OS=Drosophila melanogaster OX=7227 GN=	0	0	0	0	0	0	2154400	3495200	1111800	4833600	1627200	5896100	18021000	7014600	53109000	466510	197430	583340	3168000	4062500	10252000	3923800	4261000	13695000	2130100	2589800	9284500	NaN	NaN	1.0349	0.32043	0.42256	0.41668	0.88142	1.3114	1.3982	NaN	NaN	0.37391	1.0866	0.85865	1.216	2.196	4.0399	4.7281
Q9VRL1	Q9VRL1		Uev1A	tr|Q9VRL1|Q9VRL1_DROME GEO06356p1 OS=Drosophila melanogaster OX=7227 GN=Uev1A PE=1 SV=1	0	0	0	0	0	0	0	0	0	0	0	0	0	0	0	0	0	0	7317200	5720900	10132000	12202000	8417800	18417000	0	0	0	NaN	NaN	NaN	NaN	NaN	NaN	0.94078	0.63419	NaN	NaN	NaN	NaN	NaN	NaN	NaN	1.2344	1.2708	NaN
P91926;P91926-2	P91926;P91926-2	AP-2 complex subunit alpha	AP-2alpha	sp|P91926|AP2A_DROME AP-2 complex subunit alpha OS=Drosophila melanogaster OX=7227 GN=AP-2alpha PE=1 SV=1;sp|P91926-2|AP2A_DROME Isoform B of AP-2 complex subunit alpha OS=Drosophila melanogaster OX=7227 GN=AP-2alpha	0	0	0	0	0	0	0	0	0	8517500	4129700	17348000	9075100	3700700	18682000	0	0	0	1397200	1425100	10126000	2262300	2427600	13069000	4079600	3113100	22635000	NaN	NaN	NaN	0.37216	0.30294	NaN	1.7244	0.4498	0.99405	NaN	NaN	NaN	1.8546	1.8111	NaN	4.954	5.5844	5.801
Q9VIB5	Q9VIB5	Carboxylic ester hydrolase	alpha-Est7	tr|Q9VIB5|Q9VIB5_DROME Carboxylic ester hydrolase OS=Drosophila melanogaster OX=7227 GN=alpha-Est7 PE=1 SV=1	17432000	41933000	9217700	15792000	36663000	6240200	6527700	16176000	1617900	20607000	27466000	12965000	22506000	35730000	6913900	622750	1003200	265960	3967400	21173000	10102000	6326500	23483000	12328000	2191700	15588000	6646500	2.3281	2.9731	2.1964	1.3676	1.9149	1.4059	6.6808	5.1905	4.8314	0.32514	0.47577	0.19877	0.97959	0.3156	0.39299	2.214	2.6304	2.2781
Q9W1I7;A0A0B4LHC9	Q9W1I7;A0A0B4LHC9			tr|Q9W1I7|Q9W1I7_DROME GH07506p OS=Drosophila melanogaster OX=7227 GN=Dmel\CG5554 PE=1 SV=1;tr|A0A0B4LHC9|A0A0B4LHC9_DROME Uncharacterized protein, isoform B OS=Drosophila melanogaster OX=7227 GN=Dmel\CG5554 PE=1 SV=1	0	0	0	6768100	9085900	2939700	7707600	10126000	1508200	0	0	0	6678600	5914200	4488400	0	0	0	1987000	3996900	10092000	1053300	5728800	9793200	1937600	6691200	10740000	NaN	1.5742	1.3236	NaN	0.89843	NaN	2.9557	3.8203	3.5459	NaN	0.36565	0.18699	NaN	0.66048	NaN	5.2661	7.6385	4.6561
M9PBU9;A0A1F4	M9PBU9;A0A1F4	Protein eyes shut	eys	tr|M9PBU9|M9PBU9_DROME Eyes shut, isoform E OS=Drosophila melanogaster OX=7227 GN=eys PE=4 SV=2;sp|A0A1F4|EYS_DROME Protein eyes shut OS=Drosophila melanogaster OX=7227 GN=eys PE=1 SV=1	0	0	0	0	0	0	0	0	0	1696800	820200	4410400	2848200	918220	9671300	0	0	852650	1588000	9476900	10021000	631560	207020	3612100	1082800	878710	4055300	NaN	NaN	NaN	0.54621	0.32417	NaN	1.0907	0.47333	0.78083	NaN	NaN	NaN	2.7954	5.3578	NaN	5.5579	4.5195	3.243
M9NEZ5;P20241-2;P20241	M9NEZ5;P20241-2;P20241	Neuroglian	Nrg	tr|M9NEZ5|M9NEZ5_DROME Neuroglian, isoform G OS=Drosophila melanogaster OX=7227 GN=Nrg PE=1 SV=1;sp|P20241-2|NRG_DROME Isoform A of Neuroglian OS=Drosophila melanogaster OX=7227 GN=Nrg;sp|P20241|NRG_DROME Neuroglian OS=Drosophila melanogaster OX=7227 GN=Nr	0	0	0	0	0	0	0	0	0	4522800	975670	5770400	1168800	373350	3111900	184480	53903	255290	1014000	2211500	9983000	1365100	2780600	9541300	899320	2216800	10024000	NaN	NaN	NaN	0.32463	0.3578	0.35069	1.9639	1.6425	2.0471	NaN	NaN	NaN	1.4995	2.3133	1.238	9.0301	6.4143	7.4719
Q9V3G7	Q9V3G7	26S proteasome non-ATPase regulatory subunit 6	Rpn7	sp|Q9V3G7|PSMD6_DROME 26S proteasome non-ATPase regulatory subunit 6 OS=Drosophila melanogaster OX=7227 GN=Rpn7 PE=2 SV=1	30929000	24465000	22901000	21894000	21105000	18755000	29328000	28066000	16277000	7890700	6652100	5642000	3805100	3413300	860320	253490	274750	168430	1641600	3748700	9923400	524690	2614300	4642000	0	4211800	8023200	0.75974	0.92805	1.4037	0.77716	0.99324	0.95097	2.3446	7.0558	NaN	0.75343	0.96203	0.58189	0.7704	0.28349	0.68009	4.3904	6.8231	NaN
Q9VSK4	Q9VSK4			tr|Q9VSK4|Q9VSK4_DROME Adipose-secreted signaling protein OS=Drosophila melanogaster OX=7227 GN=Dmel\CG6983 PE=1 SV=1	0	0	0	0	0	0	0	0	0	20426000	5141400	9868200	12073000	3231200	6653000	1770200	597980	842270	2792100	5317000	9870300	3190000	4530500	15230000	3007700	6031900	15216000	NaN	NaN	NaN	0.22332	0.29698	0.40116	1.7308	1.6494	1.2928	NaN	NaN	NaN	0.45429	0.45723	0.47181	2.7366	4.6842	3.9151
Q9V3V6	Q9V3V6		Rpt5	tr|Q9V3V6|Q9V3V6_DROME 26S proteasome regulatory complex subunit p50 OS=Drosophila melanogaster OX=7227 GN=Rpt5 PE=1 SV=1	29427000	27627000	5512700	19021000	30851000	2222100	13474000	12523000	2017100	6336900	7914100	20427000	11481000	13758000	7652800	0	0	0	2450600	6637700	9855300	2137200	4986500	8945200	3087200	7040300	11213000	1.0034	0.88992	0.85482	0.9602	1.3031	NaN	3.4238	2.5634	2.0822	0.21688	0.21308	0.16972	2.0718	0.6481	NaN	7.8498	3.4765	3.411
E3CTP7;Q8MMD3;Q8MMD2;Q9W111	E3CTP7;Q8MMD3;Q8MMD2;Q9W111		Eps-15-RB;Eps-15	tr|E3CTP7|E3CTP7_DROME Epidermal growth factor receptor pathway substrate clone 15, isoform D OS=Drosophila melanogaster OX=7227 GN=Eps-15 PE=1 SV=1;tr|Q8MMD3|Q8MMD3_DROME Epidermal growth factor receptor pathway substrate clone 15, isoform C OS=Drosophila	0	0	0	0	0	0	0	0	0	5092800	926980	12444000	1483000	592480	5350300	187950	53604	594180	4542200	11323000	9815000	2622500	1118500	8465600	3336400	944080	11002000	NaN	NaN	NaN	0.54139	0.35829	0.5627	1.4206	1.1353	0.56915	NaN	NaN	NaN	3.5621	2.748	2.5787	2.8065	9.0343	4.4198
L0MNA8;P40945	L0MNA8;P40945	ADP-ribosylation factor 2	Arf102F	tr|L0MNA8|L0MNA8_DROME ADP-ribosylation factor OS=Drosophila melanogaster OX=7227 GN=Arf4 PE=3 SV=1;sp|P40945|ARF4_DROME ADP ribosylation factor 4 OS=Drosophila melanogaster OX=7227 GN=Arf4 PE=2 SV=2	0	0	0	0	0	0	0	0	0	6745100	3812900	2240000	0	0	0	0	0	0	3139200	7771600	9810000	1349200	3558200	4400500	3773000	11497000	13056000	NaN	NaN	NaN	0.71285	NaN	NaN	2.6025	2.618	3.574	NaN	NaN	NaN	0.27692	NaN	NaN	2.953	3.0485	3.6903
A1Z992	A1Z992		AGBE	tr|A1Z992|A1Z992_DROME 1,4-alpha-glucan branching enzyme OS=Drosophila melanogaster OX=7227 GN=Agbe PE=1 SV=1	95004000	48924000	149210000	98196000	44592000	135630000	76648000	40053000	115580000	8017700	5355400	7108400	11483000	7249200	7167100	0	0	0	2100800	4565900	9724900	1835100	3808500	9386200	7292900	14074000	23586000	0.49262	0.47731	0.52907	0.62286	0.63961	NaN	2.8128	2.5673	2.2636	1.3975	1.2999	1.3761	0.90241	0.56239	NaN	5.1994	3.7851	3.8915
E2QD63;Q86DS1;C4NYP8	E2QD63;Q86DS1;C4NYP8	Hsc70-interacting protein 2;Hsc70-interacting protein 1	HIP-R;HIP	tr|E2QD63|E2QD63_DROME Hsc/Hsp70-interacting protein related, isoform B OS=Drosophila melanogaster OX=7227 GN=HIP-R PE=3 SV=1;sp|Q86DS1|F10A2_DROME Hsc70-interacting protein 2 OS=Drosophila melanogaster OX=7227 GN=HIP-R PE=1 SV=2;sp|C4NYP8|F10A1_DROME Hsc7	3652000	8729500	690180	0	0	0	0	0	0	0	0	0	0	0	0	0	0	0	2520800	4545500	9696000	1945300	3816300	10429000	2791100	4743600	13957000	2.0372	NaN	NaN	NaN	NaN	NaN	2.3368	1.2748	2.0007	NaN	NaN	NaN	NaN	NaN	NaN	4.0841	2.7572	4.7204
P35416;A4V1N9;M9NDM6	P35416;A4V1N9	Paramyosin, short form	Prm	sp|P35416|MYSP2_DROME Paramyosin, short form OS=Drosophila melanogaster OX=7227 GN=Prm PE=2 SV=2;tr|A4V1N9|A4V1N9_DROME Paramyosin, isoform D OS=Drosophila melanogaster OX=7227 GN=Prm PE=1 SV=1	0	0	0	0	0	0	0	0	0	1657400	703810	15508000	2383700	607920	14489000	0	0	1187200	1213400	462030	9669000	1085400	365840	9291800	999130	530560	12306000	NaN	NaN	NaN	0.43537	0.46575	NaN	0.37924	0.4243	0.48431	NaN	NaN	NaN	5.5407	6.4101	NaN	6.1423	7.1129	9.5174
X2JDP6;M9MRG2;Q8T079	X2JDP6;M9MRG2;Q8T079	Putative oxidoreductase GLYR1 homolog	CG4747	tr|X2JDP6|X2JDP6_DROME Cytokine-like nuclear factor N-PAC OS=Drosophila melanogaster OX=7227 GN=Ndf PE=3 SV=1;tr|M9MRG2|M9MRG2_DROME Cytokine-like nuclear factor N-PAC OS=Drosophila melanogaster OX=7227 GN=Ndf PE=3 SV=1;sp|Q8T079|GLYR1_DROME Cytokine-like	0	0	0	0	0	0	0	0	0	947080	469350	1240500	828900	355780	1253300	0	0	0	2272900	2274700	9567500	0	0	0	462380	391370	3896900	NaN	NaN	NaN	0.45102	0.39804	NaN	0.92915	NaN	1.1357	NaN	NaN	NaN	1.0474	1.1018	NaN	2.7687	NaN	4.2124
M9PG83;D0IQJ8;Q03751-3;Q03751-2;Q03751	M9PG83;D0IQJ8;Q03751-3;Q03751-2;Q03751	Cysteine string protein	Csp	tr|M9PG83|M9PG83_DROME Cysteine string protein, isoform D OS=Drosophila melanogaster OX=7227 GN=Csp PE=1 SV=1;tr|D0IQJ8|D0IQJ8_DROME Cysteine string protein, isoform F OS=Drosophila melanogaster OX=7227 GN=Csp PE=1 SV=1;sp|Q03751-3|DNJC5_DROME Isoform CSP3	0	0	0	0	0	0	0	0	0	1929700	383320	4610700	0	0	0	0	0	0	878900	1084900	9475200	0	0	0	0	0	9420300	NaN	NaN	NaN	0.21278	NaN	NaN	1.0917	NaN	NaN	NaN	NaN	NaN	2.1081	NaN	NaN	8.9361	NaN	NaN
Q9VAJ9	Q9VAJ9			tr|Q9VAJ9|Q9VAJ9_DROME Mitochondrial 2-oxoglutarate/malate carrier protein OS=Drosophila melanogaster OX=7227 GN=Dmel\CG1907 PE=1 SV=1	89705000	104910000	26855000	115760000	136030000	34541000	107310000	126400000	34056000	20299000	21711000	11991000	16861000	16665000	5646100	0	0	0	3940200	10045000	9436800	4373000	17463000	17952000	9066400	30873000	30422000	1.1168	1.0789	1.1287	1.0244	1.0321	NaN	2.6732	4.3757	4.0377	0.18269	0.11438	0.18734	0.55139	0.37692	NaN	2.2034	3.7526	3.0742
M9NGG5;Q9W596	M9NGG5;Q9W596	Microtubule-associated protein futsch;Futsch heavy chain;Futsch light chain LC(f)	futsch	tr|M9NGG5|M9NGG5_DROME Futsch, isoform F OS=Drosophila melanogaster OX=7227 GN=futsch PE=1 SV=1;sp|Q9W596|FUTSC_DROME Microtubule-associated protein futsch OS=Drosophila melanogaster OX=7227 GN=futsch PE=1 SV=4	0	0	0	0	0	0	0	0	0	3263200	555200	5882500	3642200	746770	5351900	5680000	1570400	10915000	1865400	1322300	9415400	644340	442460	6253800	598770	517970	6032800	NaN	NaN	NaN	0.21398	0.21701	0.21582	0.95291	0.99694	1.0374	NaN	NaN	NaN	1.7066	1.7955	1.9989	5.6143	6.2853	13.741
Q7KMP8	Q7KMP8		Rpn9	tr|Q7KMP8|Q7KMP8_DROME 26S proteasome non-ATPase regulatory subunit 13 OS=Drosophila melanogaster OX=7227 GN=Rpn9 PE=1 SV=1	18925000	18116000	6150000	8843500	12434000	1900900	9910700	11338000	2755100	3538400	4735900	3316600	4353500	4266500	3444600	295340	332300	250950	835540	3490800	9403700	900620	3627900	6200700	810290	4583700	7349500	1.0243	1.3172	1.2144	1.0392	0.98865	1.0895	4.352	4.3902	4.677	0.3133	0.23917	0.28133	0.7983	0.72896	0.64495	7.7017	7.0366	8.661
Q9VN13	Q9VN13	Sideroflexin		sp|Q9VN13|SFXN1_DROME Sideroflexin-1-3 OS=Drosophila melanogaster OX=7227 GN=Sfxn1-3 PE=2 SV=1	103630000	93578000	38088000	97762000	88156000	36329000	118150000	93932000	54397000	19141000	18036000	11668000	0	0	0	3307800	4276100	892300	2130500	10191000	9395600	0	0	0	4574700	22107000	16714000	0.77932	0.921	0.83873	1.0916	NaN	2.0604	3.5692	NaN	5.6563	0.22674	0.24655	0.19877	0.56272	NaN	0.48745	3.9515	NaN	4.1664
Q9VHX9;A0A0B4KFA6;A0A0B4KGE4	Q9VHX9;A0A0B4KFA6;A0A0B4KGE4		CD98hc	tr|Q9VHX9|Q9VHX9_DROME alpha-glucosidase OS=Drosophila melanogaster OX=7227 GN=CD98hc PE=1 SV=1;tr|A0A0B4KFA6|A0A0B4KFA6_DROME alpha-glucosidase OS=Drosophila melanogaster OX=7227 GN=CD98hc PE=1 SV=1;tr|A0A0B4KGE4|A0A0B4KGE4_DROME alpha-glucosidase OS=Dros	4529900	15776000	490640	2100300	9625300	348280	2238000	7679000	598670	14796000	11329000	14441000	11590000	7953300	8240700	0	0	0	1166600	4430500	9346700	1262100	5409400	12570000	3842200	17970000	38710000	2.3939	3.259	2.8958	0.77427	0.64845	NaN	2.814	3.447	4.2043	0.32006	NaN	0.33716	0.7952	0.7396	NaN	7.339	5.9402	7.1234
Q9VH72	Q9VH72		CG9471-RA	tr|Q9VH72|Q9VH72_DROME TA01656p1 OS=Drosophila melanogaster OX=7227 GN=BVR PE=1 SV=1	5735900	13881000	1753800	17105000	32442000	6587000	4504200	10691000	1614000	8215200	6580900	3339100	8655000	10747000	3774800	0	0	0	2830100	10094000	9345100	3634400	13654000	11752000	1874600	7550100	8790100	1.4182	1.7169	1.9454	1.0373	1.1118	NaN	1.7792	4.0285	4.4914	0.27567	0.3524	0.33967	0.49863	0.42803	NaN	2.0111	3.4024	4.1837
Q9W1F7	Q9W1F7			tr|Q9W1F7|Q9W1F7_DROME IP15825p OS=Drosophila melanogaster OX=7227 GN=Stoml2 PE=1 SV=2	114180000	54998000	19466000	67522000	43727000	10217000	100450000	53738000	16517000	14541000	7629700	12007000	4535100	2336100	6820000	15457000	12041000	4221900	898160	2053700	9340900	2232600	7016500	9608000	1375300	4076500	16212000	0.46909	0.6027	0.51242	0.55725	0.53135	0.61868	2.7248	2.2235	3.3458	0.38396	0.12315	0.25443	0.74683	1.439	0.36441	10.122	3.3418	12.51
Q9VU02	Q9VU02	Probable small nuclear ribonucleoprotein Sm D1	SmD1	sp|Q9VU02|SMD1_DROME Probable small nuclear ribonucleoprotein Sm D1 OS=Drosophila melanogaster OX=7227 GN=SmD1 PE=1 SV=1	17231000	15005000	9141500	9068300	8546100	4963700	6224400	5669200	3099500	3869100	2780100	7987800	4110800	3441500	8524900	0	0	449940	1109000	2991900	9186100	0	0	6074600	1871200	6961200	31540000	0.80917	0.7607	0.79765	0.72349	0.65007	NaN	3.0992	2.3348	2.3562	0.47948	0.43883	0.36727	1.336	1.4028	NaN	9.4145	7.6099	10.053
Q7KMQ0;M9PC18;Q9VQN8	Q7KMQ0		Rpt1	tr|Q7KMQ0|Q7KMQ0_DROME 26S proteasome regulatory subunit 7 OS=Drosophila melanogaster OX=7227 GN=Rpt1 PE=1 SV=1	6990100	11054000	2122500	18406000	20828000	3508200	15065000	14819000	2624500	3420000	1199000	5078600	3201900	679650	5073600	0	0	0	2723000	8201500	9062100	278420	853040	918210	0	0	0	1.1158	1.4489	1.03	0.49107	0.21082	NaN	2.1257	3.4234	NaN	0.4619	0.2256	0.16542	1.0272	1.2126	NaN	3.4774	4.62	NaN
Q9VHR8-2;Q9VHR8	Q9VHR8-2;Q9VHR8	Dipeptidyl peptidase 3	DppIII	sp|Q9VHR8-2|DPP3_DROME Isoform 2 of Dipeptidyl peptidase 3 OS=Drosophila melanogaster OX=7227 GN=DppIII;sp|Q9VHR8|DPP3_DROME Dipeptidyl peptidase 3 OS=Drosophila melanogaster OX=7227 GN=DppIII PE=2 SV=2	14478000	12430000	25803000	26823000	23722000	10642000	10573000	9306300	4157500	10753000	6919700	8719700	7226400	5448900	6455000	489010	288610	397550	1560600	4281700	9011300	2542000	5587900	11044000	2954600	7673100	19788000	0.83389	0.86915	0.84557	0.65727	0.84392	0.64359	2.8113	3.2449	4.0028	0.38099	0.36399	0.40147	0.6249	0.77614	0.89167	5.966	6.066	6.9175
Q8T0Q4	Q8T0Q4		shrb	sp|Q8T0Q4|CHM4_DROME Charged multivesicular body protein 4 OS=Drosophila melanogaster OX=7227 GN=shrb PE=1 SV=1	0	0	0	3877600	9661200	1741300	3524300	8763200	1028000	9579200	11954000	3521500	4537500	4099800	1267900	9916100	8523500	3467700	2134300	9399500	8985200	0	4441000	4282000	0	4358200	0	NaN	2.6102	2.4341	1.8336	1.3678	0.81178	5.8585	2.9807	2.4891	NaN	0.60433	0.68711	0.932	0.49844	0.35634	4.0107	2.3335	1.9281
P08646	P08646	Ras-like protein 1	Ras85D	sp|P08646|RAS1_DROME Ras-like protein 1 OS=Drosophila melanogaster OX=7227 GN=Ras85D PE=1 SV=2	0	0	0	0	0	0	0	0	0	0	0	0	0	0	0	0	0	0	4343400	16912000	8968200	2372300	18185000	7407200	4880500	15616000	15358000	NaN	NaN	NaN	NaN	NaN	NaN	3.4094	4.3154	3.0837	NaN	NaN	NaN	NaN	NaN	NaN	2.3014	4.3405	3.8784
Q9VSA9	Q9VSA9			tr|Q9VSA9|Q9VSA9_DROME CG7409 OS=Drosophila melanogaster OX=7227 GN=Dmel\CG7409 PE=2 SV=1	0	0	0	0	0	0	0	0	0	51247000	27738000	37409000	58946000	10183000	26349000	4749600	2771200	3498700	4116600	7101000	8788000	6828400	10615000	15981000	10324000	13613000	24130000	NaN	NaN	NaN	0.35816	0.28349	0.25468	1.2879	1.8322	1.8281	NaN	NaN	NaN	0.70536	0.66522	0.72938	1.9081	2.0456	2.6768
Q9VUK8-2;Q9VUK8	Q9VUK8-2;Q9VUK8		Aats-gly	sp|Q9VUK8-2|GARS_DROME Isoform A of Glycine--tRNA ligase OS=Drosophila melanogaster OX=7227 GN=GlyRS;sp|Q9VUK8|GARS_DROME Glycine--tRNA ligase OS=Drosophila melanogaster OX=7227 GN=GlyRS PE=1 SV=1	8182600	7757400	2164900	4772300	3587100	962070	8847600	9941900	2537600	6165600	5165900	4952800	3460400	3360400	3736300	0	0	0	1402000	3487400	8758500	401820	1917600	7506200	428810	1726100	6613000	0.89844	0.81696	1.0868	0.80088	1.0159	NaN	2.0621	3.1016	2.8337	0.30606	0.1745	0.28107	0.79396	1.0787	NaN	3.7939	4.874	4.5075
Q8IMH4;Q9Y125	Q8IMH4;Q9Y125		Sap-r	tr|Q8IMH4|Q8IMH4_DROME Saposin-related, isoform B OS=Drosophila melanogaster OX=7227 GN=Sap-r PE=1 SV=2;tr|Q9Y125|Q9Y125_DROME BcDNA.GH08312 OS=Drosophila melanogaster OX=7227 GN=Sap-r PE=1 SV=1	25542000	24389000	3367000	22677000	30362000	4090400	25487000	33000000	3873200	8807300	8517800	2823500	6475300	8985200	2754400	17119000	22309000	6916800	1540300	9130300	8743000	1169100	6761900	6154900	1351800	8192000	8241300	0.98337	1.3589	1.4743	1.0815	1.4504	1.466	4.7025	4.7412	5.5039	0.14788	0.16258	0.14569	0.3554	0.4176	0.42402	4.8379	3.8673	5.4145
M9PCU0;P10676-2;Q9VH97;A0A0B4K648;A0A0B4K614;A0A0B4LH20	M9PCU0;P10676-2	Neither inactivation nor afterpotential protein C	ninaC	tr|M9PCU0|M9PCU0_DROME FI21215p1 OS=Drosophila melanogaster OX=7227 GN=ninaC PE=2 SV=1;sp|P10676-2|NINAC_DROME Isoform A of Neither inactivation nor afterpotential protein C OS=Drosophila melanogaster OX=7227 GN=ninaC	0	0	0	0	0	0	0	0	0	7749300	2984300	5713500	7105800	2984700	4782900	1733900	904410	1274500	1338100	3431500	8729800	0	0	0	1972000	4324000	10676000	NaN	NaN	NaN	0.32282	0.46544	0.43	2.2591	NaN	2.4047	NaN	NaN	NaN	0.74702	0.6953	0.90055	4.3313	NaN	3.2768
Q9VHA1;Q9VHA2	Q9VHA1;Q9VHA2		SpdS	tr|Q9VHA1|Q9VHA1_DROME Spermidine synthase, isoform A OS=Drosophila melanogaster OX=7227 GN=SpdS PE=1 SV=1;tr|Q9VHA2|Q9VHA2_DROME GH08387p OS=Drosophila melanogaster OX=7227 GN=SpdS PE=1 SV=2	70373000	70552000	20286000	152060000	163890000	40248000	110500000	102890000	23301000	32417000	30304000	4980500	48757000	56734000	18370000	0	0	0	2662200	15012000	8725400	21047000	42800000	20569000	27508000	39788000	21453000	0.99127	1.1555	1.0233	1.0506	1.1998	NaN	4.2105	3.2737	0.60912	0.31893	0.2895	0.19202	0.37804	0.42819	NaN	2.6773	1.2355	0.35693
Q7JWF1	Q7JWF1		Etf-QO	tr|Q7JWF1|Q7JWF1_DROME Electron transfer flavoprotein-ubiquinone oxidoreductase OS=Drosophila melanogaster OX=7227 GN=Etf-QO PE=1 SV=1	102790000	77666000	40636000	83845000	82511000	26445000	133930000	115880000	51232000	32772000	21818000	22121000	20457000	14857000	8630800	512950	381380	249850	11789000	8761300	8696000	2472300	3891600	3879900	23752000	19048000	18271000	0.90499	0.97449	1.0874	0.88258	0.72392	1.0309	0.95075	2.3723	1.9704	0.19688	0.17203	0.20835	0.34147	0.38311	0.64134	0.93439	3.2865	1.6498
Q7JXZ2	Q7JXZ2		Eip55E	tr|Q7JXZ2|Q7JXZ2_DROME cystathionine gamma-lyase OS=Drosophila melanogaster OX=7227 GN=Cth PE=1 SV=1	35924000	28011000	12762000	13841000	17283000	4377700	46243000	31892000	11689000	12526000	17081000	8215900	17886000	14535000	6390400	254650	277750	157390	2133300	7511300	8629300	11127000	15127000	17287000	21069000	31544000	31189000	0.85251	1.3808	0.9926	1.2708	1.3866	1.4401	3.8747	4.0813	4.3006	0.31654	0.30009	0.28578	0.51916	0.48487	0.834	3.7246	3.6706	3.8883
Q9VFG5;H8F4T3	Q9VFG5;H8F4T3		smp-30;smp-30-RB	tr|Q9VFG5|Q9VFG5_DROME RE17477p OS=Drosophila melanogaster OX=7227 GN=smp-30 PE=1 SV=1;tr|H8F4T3|H8F4T3_DROME MIP34848p1 OS=Drosophila melanogaster OX=7227 GN=smp-30 PE=1 SV=1	125070000	167570000	39148000	247280000	390170000	62100000	187400000	253710000	54434000	67206000	56640000	17617000	36150000	73242000	5420500	0	0	0	5478300	26725000	8602800	1766700	17716000	4458500	24974000	102870000	44398000	1.3189	1.6183	1.4976	1.6352	2.0256	NaN	4.0063	3.2383	5.0704	0.27727	0.23282	0.27248	0.31776	0.11773	NaN	1.6519	1.5088	1.6069
Q9W4X7	Q9W4X7	Eukaryotic translation initiation factor 3 subunit G-1	eIF3-S4-1	sp|Q9W4X7|EI3G1_DROME Eukaryotic translation initiation factor 3 subunit G-1 OS=Drosophila melanogaster OX=7227 GN=eIF3g1 PE=1 SV=1	14399000	19100000	3152700	8078500	11626000	1262400	12860000	18977000	1922800	4264600	7297000	1606500	0	0	0	0	0	0	2036300	11245000	8456500	3587500	13436000	11447000	0	0	0	1.3686	1.3294	1.648	1.4714	NaN	NaN	4.8869	3.0957	NaN	0.22226	0.19138	0.1473	0.3985	NaN	NaN	3.7283	2.9742	NaN
Q9VMW1;Q9VMW4;E1JHT9;Q7KTP4	Q9VMW1;Q9VMW4;E1JHT9;Q7KTP4	Reticulon-like protein	Rtnl1	tr|Q9VMW1|Q9VMW1_DROME Reticulon-like protein OS=Drosophila melanogaster OX=7227 GN=Rtnl1 PE=1 SV=2;tr|Q9VMW4|Q9VMW4_DROME Reticulon-like protein OS=Drosophila melanogaster OX=7227 GN=Rtnl1 PE=1 SV=1;tr|E1JHT9|E1JHT9_DROME Reticulon-like protein OS=Drosoph	7819700	5871600	3533100	0	0	0	0	0	0	9003200	7121000	9078800	11758000	9239200	10515000	0	0	0	1753800	4320100	8300000	1576900	4830400	7133300	2780600	7799200	11587000	0.86312	NaN	NaN	0.62971	0.61762	NaN	2.422	2.5161	2.2867	0.54796	NaN	NaN	1.1813	0.85596	NaN	4.266	5.0988	4.1654
A0A0B4JD48;Q95029-2;Q95029	A0A0B4JD48;Q95029-2;Q95029	Cathepsin L;Cathepsin L heavy chain;Cathepsin L light chain	Cp1	tr|A0A0B4JD48|A0A0B4JD48_DROME Cysteine proteinase-1, isoform D OS=Drosophila melanogaster OX=7227 GN=CtsL1 PE=1 SV=1;sp|Q95029-2|CATL1_DROME Isoform A of Cathepsin L1 OS=Drosophila melanogaster OX=7227 GN=CtsL1;sp|Q95029|CATL1_DROME Cathepsin L1 OS=Drosop	82669000	184340000	22844000	36916000	93094000	19973000	54283000	158100000	19809000	9815500	23992000	4573600	7594800	19810000	1154500	0	0	0	2207300	12014000	8286500	4417500	14762000	4696300	1529000	9690800	6399500	1.9106	1.9704	2.5784	2.3146	2.657	NaN	4.4239	3.8286	7.2874	0.27679	0.31706	0.33752	0.37835	0.13851	NaN	2.4267	1.2875	3.9172
Q0KHS7;Q9VXY7;Q0KHS6;X2JKC1	Q0KHS7;Q9VXY7;Q0KHS6;X2JKC1	Lipid storage droplets surface-binding protein 2	Lsd-2	tr|Q0KHS7|Q0KHS7_DROME Lipid storage droplet-2, isoform B OS=Drosophila melanogaster OX=7227 GN=Lsd-2 PE=1 SV=1;sp|Q9VXY7|LSD2_DROME Lipid storage droplets surface-binding protein 2 OS=Drosophila melanogaster OX=7227 GN=Lsd-2 PE=1 SV=1;tr|Q0KHS6|Q0KHS6_DRO	21236000	48410000	35401000	26472000	62653000	40751000	12863000	39423000	6505900	0	0	0	223280	1097600	2515900	0	0	0	4846000	29548000	8224500	2358600	11215000	4232000	5047100	31206000	9629100	2.4698	2.9021	4.2412	NaN	2.2258	NaN	5.5023	5.0356	5.8878	5.8548	2.7236	3.209	NaN	3.1655	NaN	1.6619	1.5948	1.645
A0A0B4LHX1;O76206	A0A0B4LHX1;O76206	Putative riboflavin kinase	anon-84Ea	tr|A0A0B4LHX1|A0A0B4LHX1_DROME riboflavin kinase OS=Drosophila melanogaster OX=7227 GN=Rfk PE=2 SV=1;sp|O76206|RIFK_DROME Putative riboflavin kinase OS=Drosophila melanogaster OX=7227 GN=Rfk PE=2 SV=1	2292000	3877200	372310	0	0	0	0	0	0	0	0	0	13534000	9572800	7094900	0	0	0	1920000	3284700	8223400	3350600	2627200	5702900	0	0	0	1.8196	NaN	NaN	NaN	0.86921	NaN	1.8752	0.65935	NaN	NaN	NaN	NaN	NaN	0.5656	NaN	3.1278	1.141	NaN
Q9VQM2	Q9VQM2	NADH dehydrogenase [ubiquinone] 1 subunit C2	ND-B14.5B	tr|Q9VQM2|Q9VQM2_DROME NADH dehydrogenase [ubiquinone] 1 subunit C2 OS=Drosophila melanogaster OX=7227 GN=ND-B14.5B PE=1 SV=1	63500000	45274000	27268000	36559000	37374000	19385000	0	0	0	10829000	4200900	14967000	7525800	2938000	13115000	0	0	0	1956500	1824100	8218000	0	0	0	0	0	13647000	0.65648	0.84729	NaN	0.63097	0.44559	NaN	1.868	NaN	NaN	0.3955	0.39285	NaN	1.6491	1.9383	NaN	6.3874	NaN	NaN
Q7K3U4	Q7K3U4	Flavin-containing monooxygenase	Fmo-2	tr|Q7K3U4|Q7K3U4_DROME Flavin-containing monooxygenase OS=Drosophila melanogaster OX=7227 GN=Fmo-2 PE=2 SV=1	17873000	31748000	23096000	8387900	20391000	4557100	17149000	29802000	19699000	19603000	27338000	8610800	7028300	13836000	2582100	0	0	0	12254000	20471000	8210200	6966400	15042000	4738900	12747000	9256700	4251300	2.1007	2.1255	1.689	1.449	1.8752	NaN	1.017	1.8992	0.87444	0.78706	0.64601	1.1814	0.35965	0.46849	NaN	0.43173	0.61656	0.49917
Q9VQ62	Q9VQ62	Protein NPC2 homolog	Npc2a	sp|Q9VQ62|NPC2_DROME NPC intracellular cholesterol transporter 2 homolog a OS=Drosophila melanogaster OX=7227 GN=Npc2a PE=2 SV=1	8153300	36587000	20526000	5739800	37080000	9850400	7178300	38671000	17813000	15863000	20099000	2283300	25964000	52940000	13724000	6257600	11389000	1430300	2517400	19841000	8186900	3489200	22556000	8521400	2498400	26561000	10764000	4.3489	5.6797	4.9861	1.3277	2.1288	1.7963	6.7505	5.3961	9.5302	1.8031	1.1497	1.2443	0.17381	0.3759	0.20324	3.0985	2.5409	4.2595
Q9V438	Q9V438		CaBP1	sp|Q9V438|PDIA6_DROME Protein disulfide-isomerase A6 homolog OS=Drosophila melanogaster OX=7227 GN=CaBP1 PE=1 SV=1	9242300	10967000	1572300	14046000	20508000	0	1997900	4134500	494830	8586900	11277000	3177200	12577000	10329000	2255100	0	0	0	1566700	7820700	8186600	1991800	9303900	8607800	0	0	0	1.072	1.6278	1.6684	1.1728	0.93542	NaN	7.8352	4.3245	NaN	NaN	NaN	0.1803	0.29555	0.24683	NaN	5.2348	2.5018	NaN
A0A0B4KFR7;A0A0B4KEW6;Q7KLE5	A0A0B4KFR7;A0A0B4KEW6;Q7KLE5		Amph	tr|A0A0B4KFR7|A0A0B4KFR7_DROME Amphiphysin, isoform C OS=Drosophila melanogaster OX=7227 GN=Amph PE=1 SV=1;tr|A0A0B4KEW6|A0A0B4KEW6_DROME Amphiphysin, isoform B OS=Drosophila melanogaster OX=7227 GN=Amph PE=1 SV=1;tr|Q7KLE5|Q7KLE5_DROME Amphiphysin OS=Dros	0	0	0	0	0	0	0	0	0	0	0	0	6958600	4453400	5777800	0	0	0	864520	2224000	8176400	1376500	4041100	8820000	2735400	5827600	13422000	NaN	NaN	NaN	NaN	0.61648	NaN	2.6751	2.2999	2.1374	NaN	NaN	NaN	NaN	0.85698	NaN	5.7846	4.7699	4.682
P02515	P02515	Heat shock protein 22	Hsp22	sp|P02515|HSP22_DROME Heat shock protein 22 OS=Drosophila melanogaster OX=7227 GN=Hsp22 PE=1 SV=4	0	0	0	0	0	0	0	0	0	18764000	19237000	4695900	19037000	22366000	3783800	5109000	4189600	1158200	1938200	8070400	8175700	0	0	0	0	0	0	NaN	NaN	NaN	0.84812	1.1441	0.89829	2.7499	NaN	NaN	NaN	NaN	NaN	0.2362	0.20367	0.21596	2.3839	NaN	NaN
Q9VU68-2;Q9VU68	Q9VU68-2;Q9VU68	Actin-interacting protein 1	flr	sp|Q9VU68-2|WDR1_DROME Isoform B of Actin-interacting protein 1 OS=Drosophila melanogaster OX=7227 GN=flr;sp|Q9VU68|WDR1_DROME Actin-interacting protein 1 OS=Drosophila melanogaster OX=7227 GN=flr PE=2 SV=1	0	0	0	0	0	0	2223000	0	2877000	2101000	779320	9385200	0	0	4796900	0	0	0	2187300	2057900	8129400	795910	734000	11378000	2373400	1388000	13090000	NaN	NaN	NaN	0.40321	NaN	NaN	0.34963	1.0492	0.7385	NaN	NaN	NaN	1.8743	NaN	NaN	3.0732	5.8471	4.788
M9PJP0;Q9VXK0	M9PJP0;Q9VXK0	Protein NipSnap	Nipsnap	tr|M9PJP0|M9PJP0_DROME Nipsnap, isoform F OS=Drosophila melanogaster OX=7227 GN=Nipsnap PE=3 SV=2;sp|Q9VXK0|NIPSN_DROME Protein NipSnap OS=Drosophila melanogaster OX=7227 GN=Nipsnap PE=2 SV=2	40453000	29884000	9186600	41963000	35389000	9262700	35878000	32219000	8270300	12599000	8487800	4343600	12002000	9689000	4495400	0	0	0	1727000	7010300	8107400	2351000	4566400	6937600	3019900	8834300	11093000	0.91718	0.86445	0.8884	0.75947	0.88683	NaN	2.8895	2.1396	3.0834	0.18648	0.29612	0.2937	0.31022	0.36711	NaN	3.6001	2.6518	3.4424
Q9VLG9	Q9VLG9			tr|Q9VLG9|Q9VLG9_DROME Argininosuccinate lyase, isoform B OS=Drosophila melanogaster OX=7227 GN=Argl PE=1 SV=3	163090000	267970000	55981000	198580000	350770000	77478000	213360000	337190000	71110000	31195000	54560000	9875900	17006000	38206000	13722000	210020	696070	1235.6	2823900	19011000	8073900	15445000	45729000	19741000	29792000	98362000	48627000	1.6946	1.5544	1.5318	1.9042	1.9535	2.6936	6.8572	4.8466	6.4085	0.17128	0.24632	0.18432	0.28757	1.269	NaN	2.4646	2.3681	2.2511
M9NCR7;M9ND31;M9NE92;Q9VMP9	M9NCR7;M9ND31;M9NE92;Q9VMP9	Glucosamine-6-phosphate isomerase	Oscillin;Gnpda1	tr|M9NCR7|M9NCR7_DROME Glucosamine-6-phosphate isomerase OS=Drosophila melanogaster OX=7227 GN=Oscillin PE=3 SV=1;tr|M9ND31|M9ND31_DROME Glucosamine-6-phosphate isomerase OS=Drosophila melanogaster OX=7227 GN=Oscillin PE=3 SV=1;tr|M9NE92|M9NE92_DROME Gluco	48922000	32679000	15647000	32610000	29962000	8780400	23926000	17796000	5825900	10418000	6869000	8112900	6568900	6825500	3940400	0	0	0	10149000	16201000	8013100	1259500	3769500	3232300	1180200	8207300	7523800	0.763	0.99415	0.76308	0.54514	0.88034	NaN	2.4773	3.0416	4.708	0.38938	0.31752	0.26925	0.99191	0.55876	NaN	1.5446	1.8931	4.3341
Q9VZ64	Q9VZ64	Probable 6-phosphogluconolactonase	CG17333	sp|Q9VZ64|6PGL_DROME Probable 6-phosphogluconolactonase OS=Drosophila melanogaster OX=7227 GN=Pgls PE=2 SV=1	85094000	95921000	26305000	85761000	99892000	20295000	93005000	103140000	24270000	9137000	8065400	1664400	4477300	6274600	1366200	0	0	0	2383600	10736000	7966700	2008600	6651100	4925300	2579400	10297000	7914700	1.1129	1.2947	1.1546	0.88051	1.1964	NaN	4.9197	3.4537	3.9931	0.22458	0.22004	0.22173	0.20733	0.27681	NaN	2.7513	2.4746	3.1144
P15425	P15425	Peptidyl-prolyl cis-trans isomerase, rhodopsin-specific isozyme	ninaA	sp|P15425|CYPR_DROME Peptidyl-prolyl cis-trans isomerase, rhodopsin-specific isozyme OS=Drosophila melanogaster OX=7227 GN=ninaA PE=1 SV=1	0	0	0	0	0	0	0	0	0	17282000	6238100	5320300	13329000	3600100	3116100	1611600	570320	605230	3156500	6566000	7939200	6526100	11770000	16768000	6406300	26385000	19336000	NaN	NaN	NaN	0.38347	0.31521	0.44028	2.3031	1.855	1.4292	NaN	NaN	NaN	0.30125	0.36675	0.3778	2.6228	2.4531	2.0784
Q962I2;P48555	Q962I2;P48555	Ras-related protein Ral-a	Rala	tr|Q962I2|Q962I2_DROME RAL2 OS=Drosophila melanogaster OX=7227 GN=Rala PE=1 SV=1;sp|P48555|RALA_DROME Ras-related protein Ral-a OS=Drosophila melanogaster OX=7227 GN=Rala PE=1 SV=2	0	0	0	0	0	0	0	0	0	0	0	0	0	0	0	0	0	0	1024600	4392700	7936100	0	0	0	0	0	0	NaN	NaN	NaN	NaN	NaN	NaN	1.5131	NaN	NaN	NaN	NaN	NaN	NaN	NaN	NaN	4.428	NaN	NaN
Q9U4G1	Q9U4G1		bdl	sp|Q9U4G1|BDL_DROME Protein borderless OS=Drosophila melanogaster OX=7227 GN=bdl PE=1 SV=1	0	0	0	0	0	0	0	0	0	6090100	1029800	6790600	5045200	1750800	4957300	0	0	180780	1243700	2169000	7826000	1610700	2081200	7146400	2030800	4458900	10642000	NaN	NaN	NaN	0.23009	0.34984	NaN	1.7394	1.5711	1.962	NaN	NaN	NaN	0.97372	0.98898	NaN	4.8887	5.0207	4.8225
O61491;O61491-2	O61491;O61491-2	Flotillin-1	Flo-1	sp|O61491|FLOT1_DROME Flotillin-1 OS=Drosophila melanogaster OX=7227 GN=Flo1 PE=2 SV=1;sp|O61491-2|FLOT1_DROME Isoform Long of Flotillin-1 OS=Drosophila melanogaster OX=7227 GN=Flo1	0	0	0	0	0	0	0	0	0	0	0	0	0	0	0	0	0	0	802910	247160	7789900	641930	1980500	6334100	0	0	4603700	NaN	NaN	NaN	NaN	NaN	NaN	0.42543	5.8331	NaN	NaN	NaN	NaN	NaN	NaN	NaN	2.0221	6.1831	NaN
Q9VQB4	Q9VQB4			tr|Q9VQB4|Q9VQB4_DROME Trans-1,2-dihydrobenzene-1,2-diol dehydrogenase OS=Drosophila melanogaster OX=7227 GN=Dmel\CG3609 PE=1 SV=1	74346000	115960000	21469000	88698000	124190000	22862000	60396000	82194000	17258000	12655000	13622000	2761100	0	0	0	0	0	0	2594500	9216800	7765500	1159300	4498400	3968200	1337600	11639000	5774200	1.517	1.5021	1.4875	1.0921	NaN	NaN	3.2701	3.881	4.4424	0.3021	0.27668	0.29088	0.28648	NaN	NaN	2.4208	3.8378	4.2701
Q9VDC0	Q9VDC0			tr|Q9VDC0|Q9VDC0_DROME GH01837p OS=Drosophila melanogaster OX=7227 GN=FOHSDR PE=1 SV=1	0	0	0	0	0	0	0	0	0	13153000	11631000	2024000	0	0	0	0	0	0	2035100	10499000	7727900	0	0	0	5205400	26807000	9699000	NaN	NaN	NaN	0.82871	NaN	NaN	8.3868	NaN	3.3998	NaN	NaN	NaN	0.16439	NaN	NaN	3.8262	NaN	2.2756
Q9VY92	Q9VY92			tr|Q9VY92|Q9VY92_DROME GEO07753p1 OS=Drosophila melanogaster OX=7227 GN=Dmel\CG11151 PE=1 SV=1	113030000	126420000	21919000	128920000	127680000	11293000	153180000	198630000	25236000	13038000	18267000	2644800	19454000	29220000	8525700	10737000	10900000	1319900	3987200	11246000	7622200	2955000	14830000	7731400	7693300	16188000	7695100	1.3144	1.3248	1.3436	1.6308	1.7852	1.3074	3.249	4.8602	4.4547	0.20219	0.122	0.20133	0.18985	0.59228	0.22635	1.7208	2.4441	2.4544
Q9VZL3	Q9VZL3		Sc2	tr|Q9VZL3|Q9VZL3_DROME very-long-chain enoyl-CoA reductase OS=Drosophila melanogaster OX=7227 GN=Sc2 PE=1 SV=1	132750000	154520000	55738000	151780000	205480000	20872000	107660000	175810000	28923000	19025000	20106000	13330000	15657000	23074000	8767600	713950	578630	416160	5793700	5413600	7601200	13141000	22691000	20578000	9446300	10784000	10765000	1.2613	1.0402	1.2448	1.0874	1.5095	0.7723	1.2057	1.7724	1.1224	0.28514	0.080132	0.18077	0.37591	0.35472	0.51325	1.3916	1.5387	0.82852
Q24372	Q24372	Lachesin	Lac	sp|Q24372|LACH_DROME Lachesin OS=Drosophila melanogaster OX=7227 GN=Lac PE=1 SV=2	0	0	0	0	0	0	0	0	0	22505000	13520000	13381000	6440200	9882100	5303000	0	0	0	3701900	2347700	7594700	3194700	5144400	23150000	7709300	4247700	12596000	NaN	NaN	NaN	0.43091	1.7691	NaN	0.56185	2.035	0.27381	NaN	NaN	NaN	0.58095	0.93281	NaN	2.4057	7.5982	0.97241
Q9VK12	Q9VK12			tr|Q9VK12|Q9VK12_DROME GH20621p OS=Drosophila melanogaster OX=7227 GN=Jhbp13 PE=1 SV=1	43069000	48422000	21390000	43340000	57614000	20151000	7624400	11693000	776550	25823000	34096000	10779000	7370000	15370000	3247400	6132400	13081000	1363600	3851100	18314000	7528400	6173100	22661000	13820000	6400000	29021000	19534000	1.3775	1.6467	1.6968	1.2918	2.2566	2.5719	3.5454	3.0514	3.8266	0.41026	0.36133	0.31218	0.32769	0.55409	0.23747	1.2714	1.5235	1.7645
Q9VTW1;Q9VTW0;X2JB05;X2JGL7	Q9VTW1;Q9VTW0;X2JB05;X2JGL7			tr|Q9VTW1|Q9VTW1_DROME RE15265p OS=Drosophila melanogaster OX=7227 GN=Sms PE=1 SV=1;tr|Q9VTW0|Q9VTW0_DROME GH19412p OS=Drosophila melanogaster OX=7227 GN=Sms PE=1 SV=1;tr|X2JB05|X2JB05_DROME Spermine synthase, isoform C OS=Drosophila melanogaster OX=7227 G	2771400	2608500	1869400	2264200	2658600	1853700	1983300	2255200	1536800	2785800	3608800	5091900	0	0	0	0	0	0	1582400	1612100	7441500	738810	535760	3010800	1469400	792270	6283700	0.90196	1.137	1.0562	0.73981	NaN	NaN	1.2678	0.63064	0.94743	0.6448	0.84368	1.153	2.009	NaN	NaN	4.9773	2.8541	4.8534
Q9VUW2	Q9VUW2			tr|Q9VUW2|Q9VUW2_DROME Inositol-1-monophosphatase OS=Drosophila melanogaster OX=7227 GN=IMP PE=1 SV=1	7747300	9064800	2621000	16824000	15020000	2655600	7989300	9376900	1834100	0	0	0	0	0	0	0	0	0	3758600	4318500	7411700	6773600	9636000	13010000	5416500	6535200	11491000	1.0206	1.1543	1.1535	NaN	NaN	NaN	1.1048	1.7015	1.5081	0.25607	0.18322	0.21773	NaN	NaN	NaN	1.5756	2.1125	1.9572
Q9VJQ3	Q9VJQ3		yellow-c	tr|Q9VJQ3|Q9VJQ3_DROME RH54244p OS=Drosophila melanogaster OX=7227 GN=yellow-c PE=1 SV=3	9878600	8396800	2164600	5250100	5708400	1282200	8867900	6807400	1578000	5206000	5383500	1729600	6365700	7621800	1839900	0	0	0	2006500	8975900	7402500	1041200	5577600	3311500	3914000	15756000	13653000	0.85587	0.97973	0.82316	1.0803	1.2313	NaN	3.7551	5.3817	4.2245	0.22467	0.25113	0.23019	0.317	0.26103	NaN	3.2566	2.553	3.4106
Q8IPP8	Q8IPP8			tr|Q8IPP8|Q8IPP8_DROME Uncharacterized protein OS=Drosophila melanogaster OX=7227 GN=Dmel\CG31548 PE=1 SV=1	36760000	40505000	9096700	32401000	29375000	5413400	30007000	26092000	8031000	13074000	10303000	4882100	5820800	11972000	2956200	0	0	0	1995500	9128800	7355300	2448100	10792000	10081000	3334400	13650000	12130000	1.0504	1.2523	1.0376	1.391	1.1949	NaN	3.4111	5.0269	4.3407	0.22743	0.14821	0.2955	0.53468	0.40056	NaN	2.9576	2.6025	3.0406
Q03427;A0A0B4KFY9	Q03427;A0A0B4KFY9	Lamin-C	LamC	sp|Q03427|LAMC_DROME Lamin-C OS=Drosophila melanogaster OX=7227 GN=LamC PE=1 SV=2;tr|A0A0B4KFY9|A0A0B4KFY9_DROME Lamin C, isoform B OS=Drosophila melanogaster OX=7227 GN=LamC PE=3 SV=1	7328000	5798400	5098700	5488200	5227600	3989400	6961600	5681000	5141800	2848200	2278000	2682700	1942400	1078400	1614200	118920	93771	116670	962230	2493600	7298000	712940	1549500	5563100	304560	702930	2703100	0.86246	0.95129	0.81145	0.72023	0.55949	0.6342	2.4331	2.8029	2.6669	0.8386	0.75039	0.67369	1.1306	0.91649	1.0633	6.7362	6.7331	8.4173
Q6NP72	Q6NP72			tr|Q6NP72|Q6NP72_DROME GEO09659p1 OS=Drosophila melanogaster OX=7227 GN=Dmel\CG13220 PE=1 SV=1	3188100	1638900	0	18391000	16116000	4269700	9178700	7791100	2391000	21650000	133650000	27561000	27621000	96521000	21774000	0	0	0	1401200	4302400	7246200	0	0	0	51075000	185410000	47287000	0.88778	0.91701	0.80188	0.69886	1.6151	NaN	2.4845	NaN	2.5401	0.34635	0.27804	0.26512	1.3376	1.0713	NaN	4.9353	NaN	2.3004
Q9W0J9;Q8SXQ8	Q9W0J9			tr|Q9W0J9|Q9W0J9_DROME GH07301p OS=Drosophila melanogaster OX=7227 GN=CT9987 PE=1 SV=1	63453000	131100000	41159000	72724000	106800000	20581000	55221000	93843000	23419000	7077700	16356000	2240900	4123800	9868400	1569100	216400	626970	115840	1629600	10619000	7226900	2003000	13238000	7109700	2698800	21727000	11792000	2.0708	2.3835	1.9359	2.2336	2.1691	2.3675	5.8486	4.8739	7.5989	0.49374	0.44725	0.45777	0.28425	0.26906	0.53678	3.8015	3.3236	4.8231
Q9VFC8;A0A0B4KHJ5;Q9VFC8-2	Q9VFC8;A0A0B4KHJ5;Q9VFC8-2	Glycogen [starch] synthase	GlyS	sp|Q9VFC8|GYS_DROME Glycogen [starch] synthase OS=Drosophila melanogaster OX=7227 GN=Glys PE=1 SV=2;tr|A0A0B4KHJ5|A0A0B4KHJ5_DROME Glycogen [starch] synthase OS=Drosophila melanogaster OX=7227 GN=Glys PE=1 SV=1;sp|Q9VFC8-2|GYS_DROME Isoform B of Glycogen [	48516000	34742000	76515000	71698000	53307000	126890000	41867000	34231000	71084000	15533000	10403000	14830000	9886400	3582800	10365000	0	0	0	1836600	2947400	7210000	2631800	3900000	10376000	2290500	4346900	12997000	0.60936	0.56651	0.52208	0.32292	0.29461	NaN	2.1067	1.818	1.9327	1.6086	1.5014	1.8264	1.1994	1.0268	NaN	4.4407	4.3965	4.1218
A0A0B4K7V5;A0A0B4KFG2;A8DY78;P91622	A0A0B4K7V5;A0A0B4KFG2;A8DY78;P91622	[Pyruvate dehydrogenase (acetyl-transferring)] kinase, mitochondrial	Pdk	tr|A0A0B4K7V5|A0A0B4K7V5_DROME Protein-serine/threonine kinase OS=Drosophila melanogaster OX=7227 GN=Pdk PE=1 SV=1;tr|A0A0B4KFG2|A0A0B4KFG2_DROME Protein-serine/threonine kinase OS=Drosophila melanogaster OX=7227 GN=Pdk PE=1 SV=1;tr|A8DY78|A8DY78_DROME Pro	11282000	29307000	10154000	10640000	27646000	9987900	11012000	36644000	7548400	9235800	17853000	4270700	2122900	5499300	1813500	279770	559020	401740	6917900	9764600	7179100	2597000	7075500	3762000	2553400	12546000	6571600	2.7687	3.088	3.4595	2.1443	2.9191	2.5403	6.3542	1.9521	5.1183	0.91817	0.94389	0.57302	0.4245	0.77541	1.6986	0.36259	1.003	2.2522
Q9W1G7	Q9W1G7		Nap1	tr|Q9W1G7|Q9W1G7_DROME LD21576p OS=Drosophila melanogaster OX=7227 GN=Nap1 PE=1 SV=1	34680000	49240000	6807300	46182000	79033000	11717000	29544000	54898000	8153800	17368000	19220000	6369700	16754000	24287000	4828600	649350	1301600	222160	2999200	14541000	7113800	4259800	18626000	11196000	1995800	11721000	7875600	1.5623	1.6283	1.8424	1.1745	1.5238	1.496	3.443	3.5878	3.7254	0.25264	0.27086	0.29053	0.40202	0.74169	0.51744	2.3381	2.2822	2.674
Q7K485	Q7K485		cathD	tr|Q7K485|Q7K485_DROME Cathepsin D OS=Drosophila melanogaster OX=7227 GN=cathD PE=1 SV=1	221580000	196210000	37998000	148990000	163190000	28761000	138570000	141930000	22992000	58903000	59499000	12448000	63270000	81721000	16180000	0	0	0	2796600	15842000	7109000	2221200	12615000	6950500	8883200	51550000	28779000	1.0324	1.0049	1.0148	1.4971	1.4495	NaN	5.3407	4.0073	6.2978	0.15131	0.17775	0.1538	0.24441	0.28909	NaN	2.4748	3.1656	2.7696
Q9VPF3;Q961W1	Q9VPF3;Q961W1	4-hydroxyphenylpyruvate dioxygenase		tr|Q9VPF3|Q9VPF3_DROME 4-hydroxyphenylpyruvate dioxygenase OS=Drosophila melanogaster OX=7227 GN=Hpd PE=1 SV=1;tr|Q961W1|Q961W1_DROME 4-hydroxyphenylpyruvate dioxygenase OS=Drosophila melanogaster OX=7227 GN=Hpd PE=1 SV=1	14380000	19577000	5751200	21289000	38088000	14598000	16401000	14542000	6917100	1800300	4952800	281020	15115000	24476000	4804600	0	0	0	5273900	16900000	7035500	1483700	6482800	2973800	7269500	31351000	16794000	1.568	1.7969	1.0683	1.9009	1.5004	NaN	4.7465	3.7829	10.611	0.35442	0.32077	0.22904	0.19578	0.34124	NaN	1.8302	1.7649	1.8186
Q9VDE2	Q9VDE2			tr|Q9VDE2|Q9VDE2_DROME Uncharacterized protein, isoform B OS=Drosophila melanogaster OX=7227 GN=Dmel\CG5793 PE=1 SV=3	25065000	25921000	59487000	47143000	63861000	62871000	31608000	32005000	72460000	15807000	27625000	6926700	16941000	23080000	7643000	0	0	0	2766600	10594000	7030600	4085800	11878000	9823000	2092400	14027000	8294700	1.3757	1.2849	1.1507	1.4251	1.376	NaN	3.5998	4.2045	5.9849	0.32284	0.2905	1.2846	0.4233	0.54312	NaN	2.7071	2.9151	3.3558
P40417-1;P40417-2;P40417	P40417-1;P40417-2;P40417	Mitogen-activated protein kinase ERK-A	rl	sp|P40417-1|ERKA_DROME Isoform H of Mitogen-activated protein kinase ERK-A OS=Drosophila melanogaster OX=7227 GN=rl;sp|P40417-2|ERKA_DROME Isoform G of Mitogen-activated protein kinase ERK-A OS=Drosophila melanogaster OX=7227 GN=rl;sp|P40417|ERKA_DROME Mit	2928600	3430100	2966900	3514000	5370700	2443500	1977500	2146200	1068400	4022700	2381900	4638100	8172000	3686100	8268700	0	0	0	973780	2836500	6924600	1163400	3255100	11197000	0	0	0	1.2233	1.6144	1.2001	0.57759	0.55954	NaN	3.6479	2.1072	NaN	0.926	0.7587	0.56435	1.0426	1.1222	NaN	8.4265	6.4336	NaN
O46067	O46067		EG:25E8.1	tr|O46067|O46067_DROME Hypoxia up-regulated protein 1 OS=Drosophila melanogaster OX=7227 GN=Grp170 PE=1 SV=1	9519900	15957000	1981100	8006100	17496000	2035200	3854400	7558300	977120	5883400	15124000	2183900	9952100	11330000	3878200	388010	162730	0	2746200	7148400	6916200	1011500	3995300	3375300	1686900	6877500	4304300	1.5569	2.5808	1.8658	1.0826	1.1859	1.0289	2.849	3.9758	4.3243	0.076664	0.21997	0.31879	0.3976	0.35329	NaN	3.2925	3.6582	3.2624
Q9VN93-2;Q9VN93	Q9VN93-2;Q9VN93	Putative cysteine proteinase CG12163	CG12163	sp|Q9VN93-2|CATF_DROME Isoform B of Cathepsin F OS=Drosophila melanogaster OX=7227 GN=CtsF;sp|Q9VN93|CATF_DROME Cathepsin F OS=Drosophila melanogaster OX=7227 GN=CtsF PE=2 SV=2	49830000	44785000	13062000	34505000	46566000	8904400	33896000	37578000	8701300	16022000	24577000	6295500	9987600	13183000	2702300	1231300	1610600	405170	1829100	14000000	6880100	2650300	11548000	10302000	2833200	12432000	12242000	0.92257	1.2121	1.0188	1.3495	1.2277	1.2727	5.5531	4.4137	3.8862	0.29618	0.30568	0.26977	0.30757	0.31555	0.39417	3.6491	3.4733	2.6286
P82890	P82890	Low molecular weight phosphotyrosine protein phosphatase 1	primo-1	sp|P82890|PPAC1_DROME Low molecular weight phosphotyrosine protein phosphatase 1 OS=Drosophila melanogaster OX=7227 GN=primo-1 PE=1 SV=1	18425000	17885000	2901800	12641000	21546000	2550300	15609000	21747000	2435900	0	0	0	12400000	10575000	6144000	0	0	0	26228000	8109300	6871800	27252000	10422000	8185500	0	0	0	1.1044	1.5762	1.3509	NaN	1.0468	NaN	0.49373	0.6496	NaN	0.18056	0.20096	0.21507	NaN	0.64913	NaN	0.393	0.37638	NaN
M9PGW0;P27716	M9PGW0;P27716	Innexin;Innexin inx1	ogre	tr|M9PGW0|M9PGW0_DROME Innexin OS=Drosophila melanogaster OX=7227 GN=ogre PE=3 SV=1;sp|P27716|INX1_DROME Innexin inx1 OS=Drosophila melanogaster OX=7227 GN=ogre PE=1 SV=1	5114700	2394400	6308700	0	0	0	2797100	1385400	2247600	6972400	2545400	15971000	13053000	3981300	21940000	401180	558830	1454700	1113000	1652600	6721800	6953800	7550500	32597000	2986600	6437600	29756000	0.54775	NaN	0.55231	0.38346	0.32475	1.7077	1.6028	0.97001	2.0342	1.4543	NaN	0.50522	2.0159	1.7721	3.3965	6.3913	3.7312	8.6278
Q9VDY8;A0A0B4KGG5	Q9VDY8;A0A0B4KGG5		vib	tr|Q9VDY8|Q9VDY8_DROME MIP08680p OS=Drosophila melanogaster OX=7227 GN=vib PE=1 SV=1;tr|A0A0B4KGG5|A0A0B4KGG5_DROME Vibrator, isoform B OS=Drosophila melanogaster OX=7227 GN=vib PE=1 SV=1	16479000	15245000	3247800	5626700	10284000	1720000	5915200	6388700	1546400	13384000	10206000	13014000	3176500	2967800	4213000	244610	457450	217970	1053400	2398700	6711500	1155200	2362500	5748900	2378300	3821300	9406000	1.2905	1.5742	1.4008	0.81725	0.88757	1.1093	3.044	1.8643	2.016	0.2472	0.62739	1.2945	0.91555	0.89845	0.71477	5.7057	5.2191	5.3016
Q9V9S8;Q9V9S8-3;Q9V9S8-2	Q9V9S8;Q9V9S8-3	Ferrochelatase, mitochondrial	FeCh	sp|Q9V9S8|HEMH_DROME Ferrochelatase, mitochondrial OS=Drosophila melanogaster OX=7227 GN=FeCh PE=2 SV=1;sp|Q9V9S8-3|HEMH_DROME Isoform C of Ferrochelatase, mitochondrial OS=Drosophila melanogaster OX=7227 GN=FeCh	40035000	38341000	2465800	23409000	23534000	5265700	10872000	8806400	2149700	7001300	3843900	4028000	15960000	8132700	10654000	0	0	0	1407600	2408600	6633900	0	0	0	0	0	10555000	0.72574	0.98902	0.68916	0.52461	0.56877	NaN	1.2641	NaN	NaN	0.24435	0.24767	0.24419	0.79665	0.71193	NaN	2.4622	NaN	NaN
Q7K738	Q7K738		Ubc10	sp|Q7K738|UBC10_DROME Ubiquitin-conjugating enzyme E2-18 kDa OS=Drosophila melanogaster OX=7227 GN=Ubc10 PE=1 SV=1	0	0	0	0	0	0	0	0	0	6118100	2992200	2618500	0	0	0	2349300	1556100	1100500	705880	4153900	6516000	0	0	0	0	0	0	NaN	NaN	NaN	0.60098	NaN	0.58912	4.4525	NaN	NaN	NaN	NaN	NaN	0.37095	NaN	0.51182	6.5706	NaN	NaN
Q7K3N4	Q7K3N4			tr|Q7K3N4|Q7K3N4_DROME GH26015p OS=Drosophila melanogaster OX=7227 GN=Dmel\CG8888 PE=1 SV=1	2137500	796780	5054300	6000800	1071200	9593700	2439200	570380	3685700	0	0	9616900	0	0	8571100	0	0	0	0	0	6423600	0	0	7024500	682950	950710	14444000	0.33953	0.21694	0.26163	NaN	NaN	NaN	NaN	NaN	1.0722	2.0292	1.4842	1.4182	NaN	NaN	NaN	NaN	NaN	5.31
A0A0B4LGP3;Q7KVF1;Q9W0X0	A0A0B4LGP3;Q7KVF1;Q9W0X0		emp	tr|A0A0B4LGP3|A0A0B4LGP3_DROME Epithelial membrane protein, isoform E OS=Drosophila melanogaster OX=7227 GN=emp PE=3 SV=1;tr|Q7KVF1|Q7KVF1_DROME Epithelial membrane protein, isoform A OS=Drosophila melanogaster OX=7227 GN=emp PE=3 SV=1;tr|Q9W0X0|Q9W0X0_DRO	8465000	17184000	6616400	15328000	25517000	2939800	6723300	13140000	1712600	3620900	7550600	441340	7896200	15047000	1672200	0	0	0	3138900	13541000	6334200	2157100	12378000	4722000	2800100	15808000	5574600	2.0702	2.0123	1.7739	1.6496	2.0288	NaN	3.2805	5.5919	5.2563	0.57911	0.20162	0.18571	0.13985	0.20511	NaN	1.1375	1.8897	1.9642
Q9VN86	Q9VN86			tr|Q9VN86|Q9VN86_DROME AT14148p OS=Drosophila melanogaster OX=7227 GN=Sccpdh1 PE=1 SV=1	31089000	50831000	6869000	38360000	73397000	6675300	14135000	34643000	1657800	13441000	26723000	2079400	17210000	43633000	3870500	0	0	0	2796300	17710000	6299700	1412900	9723700	3907900	1011100	9829900	2586900	1.6763	2.0004	2.2669	1.6692	2.3344	NaN	5.0263	6.8803	4.9321	0.23064	0.19021	0.19286	0.14768	0.28319	NaN	1.9151	2.5034	2.0885
Q9XZ57;Q7JZD3	Q9XZ57;Q7JZD3		Eb1	tr|Q9XZ57|Q9XZ57_DROME Eb1, isoform E OS=Drosophila melanogaster OX=7227 GN=Eb1 PE=1 SV=1;tr|Q7JZD3|Q7JZD3_DROME Eb1, isoform A OS=Drosophila melanogaster OX=7227 GN=Eb1 PE=1 SV=1	0	0	0	0	0	0	0	0	0	0	0	0	0	0	0	0	0	0	1661100	1438200	6294000	0	0	0	0	0	0	NaN	NaN	NaN	NaN	NaN	NaN	0.83358	NaN	NaN	NaN	NaN	NaN	NaN	NaN	NaN	2.1929	NaN	NaN
C0HK92-2	C0HK92-2			sp|C0HK92-2|Y5076_DROME Isoform E of Uncharacterized protein CG45076 OS=Drosophila melanogaster OX=7227 GN=CG45076	5907700	0	13066000	11386000	2640000	22367000	6113500	0	10204000	5138700	9445700	10200000	4296300	0	7441300	0	0	0	0	0	6253600	0	0	5500900	0	0	9210300	NaN	0.20214	NaN	1.007	NaN	NaN	NaN	NaN	NaN	NaN	1.941	NaN	2.6355	NaN	NaN	NaN	NaN	NaN
O77434;M9PGI6	O77434;M9PGI6		Sec22	tr|O77434|O77434_DROME EG:34F3.8 protein OS=Drosophila melanogaster OX=7227 GN=Sec22 PE=1 SV=2;tr|M9PGI6|M9PGI6_DROME Secretory 22, isoform B OS=Drosophila melanogaster OX=7227 GN=Sec22 PE=1 SV=1	5549400	4604400	0	3101200	3510700	138130	0	0	0	3109700	2781400	2611900	0	0	0	0	0	0	1474300	5245800	6221100	2029500	4664400	7887600	2920300	6283200	7640800	1.2275	1.1741	NaN	0.84738	NaN	NaN	3.2897	3.0237	2.161	NaN	NaN	NaN	0.74357	NaN	NaN	3.4064	4.4437	2.517
Q8IML5;Q8IML3;Q8IML4;Q6NLA3;Q9XZ10	Q8IML5;Q8IML3;Q8IML4;Q6NLA3;Q9XZ10	V-type proton ATPase subunit a	Vha100-1	tr|Q8IML5|Q8IML5_DROME V-type proton ATPase subunit a OS=Drosophila melanogaster OX=7227 GN=Vha100-1 PE=1 SV=1;tr|Q8IML3|Q8IML3_DROME V-type proton ATPase subunit a OS=Drosophila melanogaster OX=7227 GN=Vha100-1 PE=1 SV=1;tr|Q8IML4|Q8IML4_DROME V-type prot	0	0	0	0	0	0	0	0	0	7147100	3068900	13535000	7408600	3196900	15896000	0	0	0	697830	1577600	6183500	1408700	2882500	12658000	8209800	5015100	24405000	NaN	NaN	NaN	0.38343	0.47181	NaN	2.4089	1.8988	1.0842	NaN	NaN	NaN	1.7068	2.2209	NaN	7.1232	7.9111	3.8379
Q7K1C0;M9PBY4	Q7K1C0;M9PBY4		ND-15	tr|Q7K1C0|Q7K1C0_DROME GH23780p OS=Drosophila melanogaster OX=7227 GN=ND-15 PE=1 SV=1;tr|M9PBY4|M9PBY4_DROME NADH dehydrogenase (Ubiquinone) 15 kDa subunit, isoform H OS=Drosophila melanogaster OX=7227 GN=ND-15 PE=4 SV=1	13825000	10425000	2943000	0	0	0	14949000	13494000	1114600000	0	0	0	10191000	4608400	22702000	0	0	0	0	0	6069000	0	0	0	0	0	0	0.68018	NaN	0.78212	NaN	0.34	NaN	NaN	NaN	NaN	0.38714	NaN	78.612	NaN	1.504	NaN	NaN	NaN	NaN
Q9VDI1;A0A0B4KH28	Q9VDI1;A0A0B4KH28		Synd	tr|Q9VDI1|Q9VDI1_DROME LD46328p OS=Drosophila melanogaster OX=7227 GN=Synd PE=1 SV=2;tr|A0A0B4KH28|A0A0B4KH28_DROME Syndapin, isoform C OS=Drosophila melanogaster OX=7227 GN=Synd PE=1 SV=1	0	0	0	0	0	0	0	0	0	2341200	1261500	612510	6627300	3836100	2370300	0	0	0	930850	3239200	6061300	2039300	4594200	7928900	352020	1041200	1923000	NaN	NaN	NaN	0.57926	0.7884	NaN	3.1471	2.2626	2.5347	NaN	NaN	NaN	0.2787	0.42942	NaN	3.896	2.1775	3.3936
P40301	P40301	Proteasome subunit alpha type-2	Prosalpha2	sp|P40301|PSA2_DROME Proteasome subunit alpha type-2 OS=Drosophila melanogaster OX=7227 GN=Prosalpha2 PE=1 SV=1	42729000	34734000	7997500	85347000	72792000	16652000	56806000	63340000	16877000	0	0	0	0	0	0	489190	343530	365540	1565500	4959000	6057500	3925200	9791200	18972000	2355600	8337400	10406000	0.83014	0.74189	0.97504	NaN	NaN	0.52334	2.8357	2.4914	4.6354	0.2761	0.12824	0.38289	NaN	NaN	0.71307	3.2404	4.3925	5.1224
M9PI82;P91891	M9PI82;P91891	Protein Mo25	Mo25	tr|M9PI82|M9PI82_DROME Mo25, isoform B OS=Drosophila melanogaster OX=7227 GN=Mo25 PE=3 SV=1;sp|P91891|MO25_DROME Protein Mo25 OS=Drosophila melanogaster OX=7227 GN=Mo25 PE=2 SV=2	5874600	11134000	2586200	8719600	16315000	2778700	0	0	0	9257800	8766000	5282000	12608000	7854600	7010100	322680	355190	135470	1560400	4589100	6014200	999390	3831000	4301000	2320900	6529100	15857000	1.4405	1.4223	NaN	0.99556	0.72568	0.99815	2.5263	4.0146	2.4987	0.55446	0.3528	NaN	0.55859	0.71971	0.423	3.4035	4.1048	2.8541
Q9W060	Q9W060		mv	sp|Q9W060|LYST_DROME Lysosomal-trafficking regulator OS=Drosophila melanogaster OX=7227 GN=mv PE=1 SV=2	1779700	168730	4010000	0	0	0	1888800	218510	3831100	1341600	350830	8033600	0	0	0	456300	39646	2921300	456360	331550	6011800	610790	335830	7575300	821670	503220	8152600	0.1043	NaN	0.12101	0.17159	NaN	0.091422	0.52952	0.51113	0.65149	1.7998	NaN	1.9337	5.3419	NaN	7.0142	9.8999	10.452	9.7485
X2JFR6;P41374	X2JFR6;P41374	Eukaryotic translation initiation factor 2 subunit 1	eIF-2alpha	tr|X2JFR6|X2JFR6_DROME Eukaryotic translation initiation factor 2 subunit 1 OS=Drosophila melanogaster OX=7227 GN=eIF2alpha PE=3 SV=1;sp|P41374|IF2A_DROME Eukaryotic translation initiation factor 2 subunit 1 OS=Drosophila melanogaster OX=7227 GN=eIF2alpha	21650000	51210000	23264000	7214200	11491000	1839700	14873000	22013000	2638900	0	0	0	9204500	18419000	7351300	0	0	0	1170900	4913100	5986100	3086600	8374900	11017000	0	3733200	4702400	1.37	1.431	1.3355	NaN	1.6209	NaN	2.1454	2.1784	NaN	0.40536	0.22096	0.19181	NaN	0.68702	NaN	2.2758	1.8947	NaN
P06002	P06002	Opsin Rh1	ninaE	sp|P06002|OPS1_DROME Opsin Rh1 OS=Drosophila melanogaster OX=7227 GN=ninaE PE=1 SV=1	0	0	0	0	0	0	0	0	0	71003000	39115000	19961000	30711000	23664000	14281000	1465300	826250	1788700	2891700	8962500	5984800	0	0	0	0	0	0	NaN	NaN	NaN	0.59245	0.58037	0.51346	2.3159	NaN	NaN	NaN	NaN	NaN	0.26916	0.27672	0.7254	1.7927	NaN	NaN
M9NG50;M9PHG2;C7LAH9;P46150-5;P46150-2;P46150;P46150-3;P46150-4	M9NG50;M9PHG2;C7LAH9;P46150-5;P46150-2;P46150;P46150-3;P46150-4	Moesin/ezrin/radixin homolog 1	Moe	tr|M9NG50|M9NG50_DROME Moesin/ezrin/radixin homolog 1 OS=Drosophila melanogaster OX=7227 GN=Moe PE=1 SV=1;tr|M9PHG2|M9PHG2_DROME Moesin/ezrin/radixin homolog 1 OS=Drosophila melanogaster OX=7227 GN=Moe PE=1 SV=1;tr|C7LAH9|C7LAH9_DROME Moesin/ezrin/radixin	677120	524190	161270	919400	1006800	332630	5978600	5861100	12403000	7639600	4874000	5246000	12962000	8436000	9036900	0	0	0	848010	3858800	5968200	593170	2382100	4011900	2479300	8771000	10554000	0.79018	1.1821	1.1417	0.75217	0.75221	NaN	3.6385	2.5763	3.0728	0.26597	0.29522	0.44624	0.40828	0.36259	NaN	6.0312	3.8073	4.1291
Q8IMJ0;Q0KHY8	Q8IMJ0;Q0KHY8			tr|Q8IMJ0|Q8IMJ0_DROME Uncharacterized protein, isoform A OS=Drosophila melanogaster OX=7227 GN=VhaAC45RP PE=1 SV=1;tr|Q0KHY8|Q0KHY8_DROME Uncharacterized protein, isoform B OS=Drosophila melanogaster OX=7227 GN=VhaAC45RP PE=1 SV=1	0	0	0	0	0	0	0	0	0	3512600	1039200	8122900	2542900	572010	7893200	0	0	0	0	0	5956700	0	0	0	547910	1252900	10829000	NaN	NaN	NaN	0.28552	0.22809	NaN	NaN	NaN	1.5628	NaN	NaN	NaN	1.9098	2.6251	NaN	NaN	NaN	9.6394
Q9VEX6	Q9VEX6		bor	sp|Q9VEX6|ATD3A_DROME ATPase family AAA domain-containing protein 3A homolog OS=Drosophila melanogaster OX=7227 GN=bor PE=1 SV=2	6945900	6586200	2475300	2766300	2556400	1906400	4558000	2996100	2293400	2055400	1432800	4724600	2985000	1505000	4235900	0	0	0	733650	1526900	5943400	257120	578080	2862400	457060	1067800	3442900	0.9663	0.98802	0.59738	0.88619	0.53091	NaN	2.1129	NaN	2.3111	0.34984	1.0778	0.24872	2.2435	1.675	NaN	5.7064	6.3681	8.7465
Q9W3F6;A8JV22;X2JEJ0;A8JV24	Q9W3F6;A8JV22;X2JEJ0;A8JV24		CG1440-RC	tr|Q9W3F6|Q9W3F6_DROME Bleomycin hydrolase OS=Drosophila melanogaster OX=7227 GN=Dmel\CG1440 PE=1 SV=2;tr|A8JV22|A8JV22_DROME Bleomycin hydrolase OS=Drosophila melanogaster OX=7227 GN=Dmel\CG1440 PE=1 SV=1;tr|X2JEJ0|X2JEJ0_DROME Bleomycin hydrolase OS=Dros	2539000	1733600	701520	10240000	10488000	14196000	6410600	8563600	12133000	0	0	0	0	0	0	0	0	0	1059400	3533400	5932000	0	0	0	0	0	0	0.73204	0.95558	0.96397	NaN	NaN	NaN	2.0416	NaN	NaN	0.3955	0.40223	0.94135	NaN	NaN	NaN	3.4684	NaN	NaN
[truncated: 729 more rows]
[truncated: 12 more columns]

## Sheet: 1% vs 8% yeast (Fig. 2g)
name	ID	log2 (female_1% / female_8%)	log2 (male_1% / male_8%)	female_1%_vs_female_8%_p.val	male_1%_vs_male_8%_p.val
Ace	A0A0B4KGI5	0.143	0.336	0.0060882	4.31e-07
Adh	P00334	-0.511	-0.341	6.05e-09	3.46e-06
Ahcy	Q27580	-0.288	-0.277	2.76e-08	5.07e-08
Akr1B.1	Q9VTK9	-0.394	-0.488	4.77e-08	1.25e-09
Amy-d	P08144	-0.86	-1.31	3.65e-06	4.71e-09
Ance	Q10714	-0.837	-0.84	3.47e-09	3.28e-09
AOX1	Q9VF53	0.179	-0.612	0.0435019	2.87e-07
Argl	Q9VLG9	-0.575	-0.694	4.92e-09	1.73e-10
BEST:GH09055	Q7JVX3	-0.73	-0.725	2.82e-08	3.15e-08
BEST:GH11240	Q9VC18	-0.449	-0.53	3.04e-08	1.8e-09
CAH9	Q9VB76	0.443	0.829	0.00011707	1.55e-08
CanA1	P48456	8.67	0.0256	1.02e-26	0.837584
[truncated: 6,013 more rows]

## Sheet: Lsp2 RNAi (Fig.4e)
name	ID	log2 (Lsp2.RNAi.r4 / Ctrl)	log2 (Lsp2.RNAi.r4 / Lsp2.RNAi.WCS)	Lsp2.RNAi.r4_vs_Ctrl_p.val	Lsp2.RNAi.r4_vs_Lsp2.RNAi.WCS_p.val
[truncated: 6,258 more rows]
