# Supplementary material for: Storage Protein-Mediated Translation Control Links Juvenile Diet to Longevity in Drosophila
Source: Research Square preprint supplement (doi:10.21203/rs.3.rs-6791339/v1), 2025-07-15
Supplement: Supplementary file 2 [file 90eee73c86e9d606e1316170.xlsx]

## Sheet: Female
Protein.Group	Protein.Names	Genes	First.Protein.Description	8%_female_1	8%_female_2	8%_female_3	8%_female_4	8%_female_5	8%_female_6	1%_female_1	1%_female_2	1%_female_3	1%_female_4	1%_female_5	1%_female_6		8%_average	1%_average	1%/8%
P02574	ACT4_DROME	Act79B	Actin, larval muscle	22700000000	30900000000	21200000000	22600000000	24900000000	26900000000	23300000000	22700000000	25900000000	25100000000	22300000000	21400000000		2.48667e+10	23450000000	0.943029
P00334	ADH_DROME	Adh	Alcohol dehydrogenase	17900000000	19400000000	19100000000	17900000000	17400000000	18600000000	12000000000	12700000000	13800000000	13800000000	13300000000	11800000000		1.83833e+10	12900000000	0.701723
P35381	ATPA_DROME	blw	ATP synthase subunit alpha, mitochondrial	11700000000	11300000000	11300000000	11800000000	12500000000	11900000000	11400000000	11500000000	12300000000	12200000000	11800000000	11800000000		11750000000	1.18333e+10	1.00709
P02283	H2B_DROME	His2B	Histone H2B	10900000000	9590000000	9910000000	10200000000	10700000000	10200000000	9490000000	10200000000	11000000000	9920000000	10100000000	10300000000		10250000000	1.01683e+10	0.992033
Q05825	ATPB_DROME	ATPsynbeta	ATP synthase subunit beta, mitochondrial	9370000000	10300000000	9260000000	9320000000	9360000000	10300000000	11900000000	9390000000	11800000000	10900000000	10600000000	10900000000		9.65167e+09	10915000000	1.13089
P07487	G3P2_DROME	Gapdh2	Glyceraldehyde-3-phosphate dehydrogenase 2	8920000000	9060000000	9550000000	9120000000	9340000000	8040000000	9320000000	8810000000	8680000000	8810000000	8420000000	8790000000		9005000000	8805000000	0.97779
P06742-2	MLC1_DROME	Mlc1	Isoform Indirect flight muscle of Myosin light chain alkali	8170000000	8390000000	7660000000	8880000000	8700000000	8190000000	7790000000	7780000000	7290000000	8160000000	7820000000	8130000000		8.33167e+09	7.82833e+09	0.939588
P53501	ACT3_DROME	Act57B	Actin-57B	6030000000	10500000000	7330000000	7740000000	8350000000	9930000000	10600000000	7990000000	11300000000	10700000000	9510000000	9130000000		8.31333e+09	9.87167e+09	1.18745
P48610-2;P48610-3	KARG_DROME	Argk1	Isoform A of Arginine kinase 1	7280000000	8300000000	8720000000	7840000000	8000000000	8900000000	9660000000	7640000000	9650000000	9790000000	9270000000	8830000000		8.17333e+09	9140000000	1.11827
P05661-19	MYSA_DROME	Mhc	Isoform F of Myosin heavy chain, muscle	6960000000	8640000000	7090000000	6640000000	8460000000	8900000000	9070000000	8350000000	9330000000	8620000000	7910000000	7460000000		7.78167e+09	8.45667e+09	1.08674
P13607	ATNA_DROME	Atpalpha	Sodium/potassium-transporting ATPase subunit alpha	7080000000	7960000000	7390000000	7740000000	7520000000	7800000000	7310000000	7030000000	8140000000	8110000000	7660000000	7570000000		7.58167e+09	7.63667e+09	1.00725
P84040	H4_DROME	His4	Histone H4	6230000000	7240000000	6240000000	6960000000	7350000000	8480000000	7840000000	6720000000	9540000000	8910000000	7980000000	7310000000		7.08333e+09	8050000000	1.13647
Q26365-2	ADT_DROME	sesB	Isoform A of ADP,ATP carrier protein	6740000000	7790000000	7880000000	7180000000	6100000000	6190000000	7830000000	7030000000	7160000000	7040000000	7440000000	7260000000		6980000000	7.29333e+09	1.04489
Q9VGM2	Q9VGM2_DROME	fabp	Fatty acid binding protein, isoform B	6810000000	7160000000	6310000000	6630000000	6830000000	7210000000	7030000000	6890000000	7460000000	6880000000	7020000000	7400000000		6825000000	7.11333e+09	1.04225
Q9VU58	NPLP2_DROME	Nplp2	Neuropeptide-like 2	8590000000	7510000000	6100000000	6650000000	6370000000	5320000000	4550000000	5360000000	4660000000	4540000000	3440000000	4510000000		6.75667e+09	4510000000	0.667489
P02299	H3_DROME	His3	Histone H3	6250000000	6190000000	6000000000	6530000000	7090000000	7950000000	5380000000	5530000000	6590000000	6380000000	5440000000	6000000000		6.66833e+09	5.88667e+09	0.882779
P06604	TBA2_DROME	alphaTub85E	Tubulin alpha-2 chain	6300000000	6770000000	6640000000	6630000000	6700000000	6830000000	6740000000	6100000000	6600000000	7070000000	6680000000	6410000000		6645000000	6600000000	0.993228
Q94920	VDAC_DROME	porin	Voltage-dependent anion-selective channel	5980000000	5770000000	5970000000	6140000000	6480000000	6400000000	6390000000	5650000000	6430000000	5650000000	6200000000	6190000000		6.12333e+09	6085000000	0.99374
P92177	1433E_DROME	14-3-3epsilon	14-3-3 protein epsilon	6040000000	5230000000	5370000000	5710000000	5470000000	5740000000	5270000000	5070000000	5720000000	5740000000	5780000000	5630000000		5.59333e+09	5535000000	0.989571
P18432	MLR_DROME	Mlc2	Myosin regulatory light chain 2	6080000000	5860000000	5040000000	5070000000	5320000000	5460000000	4300000000	5150000000	5000000000	4290000000	5750000000	4830000000		5.47167e+09	4.88667e+09	0.893086
Q9VV36	RETIN_DROME	retinin	Retinin	4670000000	4050000000	5530000000	4790000000	5040000000	6260000000	5780000000	4650000000	6970000000	6150000000	5360000000	5840000000		5.05667e+09	5.79167e+09	1.14535
P07764	ALF_DROME	Ald1	Fructose-bisphosphate aldolase	4860000000	5160000000	5000000000	5090000000	4950000000	4920000000	5350000000	5180000000	6250000000	5520000000	5370000000	5190000000		4.99667e+09	5.47667e+09	1.09606
P15007;P15007-2	ENO_DROME	Eno	Enolase	4780000000	4880000000	4940000000	4710000000	4850000000	5310000000	5390000000	5060000000	5390000000	5260000000	5180000000	5180000000		4.91167e+09	5.24333e+09	1.06753
P29310-3	1433Z_DROME	14-3-3zeta	Isoform C of 14-3-3 protein zeta	5670000000	4650000000	4770000000	5170000000	4870000000	4040000000	4480000000	4640000000	4880000000	4750000000	4480000000	4850000000		4.86167e+09	4680000000	0.962633
Q7KNR7;Q9VV42	Q7KNR7_DROME;Q9VV42_DROME	Pdh	Photoreceptor dehydrogenase, isoform C	4760000000	5090000000	4580000000	4800000000	4970000000	4610000000	4740000000	4690000000	4550000000	4730000000	4850000000	4880000000		4.80167e+09	4740000000	0.987157
P22700-2	ATC1_DROME	SERCA	Isoform A of Calcium-transporting ATPase sarcoplasmic/endoplasmic reticulum type	4400000000	5180000000	4750000000	4510000000	4460000000	4770000000	5060000000	4670000000	5140000000	5070000000	4980000000	5030000000		4.67833e+09	4.99167e+09	1.06698
Q9VAC1	Q9VAC1_DROME	anon-WO0153538.36	Acetyl-CoA hydrolase	4990000000	4120000000	4560000000	4050000000	4190000000	4080000000	3770000000	3770000000	4070000000	3840000000	4240000000	3920000000		4.33167e+09	3935000000	0.908426
P53777	MLP1_DROME	Mlp60A	Muscle LIM protein 1	4680000000	3610000000	4660000000	4940000000	4420000000	3390000000	3750000000	4480000000	3590000000	4120000000	4270000000	4340000000		4.28333e+09	4.09167e+09	0.955253
P08736	EF1A1_DROME	eEF1alpha1	Elongation factor 1-alpha 1	4080000000	4340000000	4340000000	4000000000	3920000000	4440000000	4230000000	4040000000	4430000000	4990000000	4650000000	4240000000		4.18667e+09	4430000000	1.05812
Q24388	LSP2_DROME	Lsp2	Larval serum protein 2	3650000000	5750000000	4060000000	3170000000	4110000000	4020000000	1750000000	2040000000	2490000000	2480000000	2090000000	1570000000		4.12667e+09	2070000000	0.501616
Q9W401-2;Q9W401	CISY_DROME	Cs1	Probable citrate synthase, mitochondrial	3800000000	4010000000	3960000000	4000000000	4010000000	4170000000	4230000000	3870000000	4440000000	4770000000	4290000000	4820000000		3.99167e+09	4.40333e+09	1.10313
Q7K084	Q7K084_DROME	Obp44a	Odorant-binding protein 44a, isoform A	3460000000	4200000000	3620000000	3580000000	3770000000	4080000000	4260000000	3710000000	4230000000	4310000000	4210000000	3830000000		3785000000	4.09167e+09	1.08102
P19107	ARRB_DROME	Arr2	Phosrestin-1	3860000000	3510000000	3710000000	4040000000	3770000000	3480000000	3620000000	3190000000	3540000000	3660000000	3630000000	3640000000		3.72833e+09	3.54667e+09	0.951274
Q9VEB1	Q9VEB1_DROME	Mdh2	Malate dehydrogenase, mitochondrial	3770000000	3490000000	3550000000	3770000000	3580000000	3380000000	3250000000	3620000000	3330000000	3430000000	3710000000	3400000000		3590000000	3.45667e+09	0.96286
Q9VIQ8	Q9VIQ8_DROME	COX4	Cytochrome c oxidase subunit 4	3230000000	3500000000	3420000000	3600000000	3580000000	3680000000	2960000000	2770000000	2770000000	3030000000	3320000000	3190000000		3.50167e+09	3.00667e+09	0.858639
P05661-2	MYSA_DROME	Mhc	Isoform BDBBA of Myosin heavy chain, muscle	3410000000	3330000000	3560000000	3000000000	3980000000	3340000000	3290000000	4050000000	3680000000	3120000000	3150000000	2770000000		3.43667e+09	3.34333e+09	0.972842
Q9VMT2;X2JD70	Q9VMT2_DROME;X2JD70_DROME	TpnC25D	GEO07854p1	3490000000	3420000000	3440000000	3150000000	3300000000	3760000000	3730000000	3390000000	4070000000	3740000000	3660000000	3820000000		3.42667e+09	3735000000	1.08998
Q9VFC7	Q9VFC7_DROME	Mf	Mf5 protein	3070000000	3430000000	3390000000	3240000000	3500000000	3690000000	3480000000	3230000000	3480000000	3310000000	3490000000	3310000000		3.38667e+09	3.38333e+09	0.999016
P20478	GLNA2_DROME	Gs2	Glutamine synthetase 2 cytoplasmic	3160000000	3160000000	3390000000	3560000000	3810000000	3010000000	3090000000	3170000000	3060000000	3370000000	3600000000	3980000000		3.34833e+09	3.37833e+09	1.00896
Q9VQF7	BACC_DROME	Bacc	Bacchus	3520000000	3430000000	2850000000	3580000000	3490000000	3200000000	3030000000	3590000000	3030000000	2560000000	3590000000	3470000000		3345000000	3.21167e+09	0.96014
P10676	NINAC_DROME	ninaC	Neither inactivation nor afterpotential protein C	3380000000	3460000000	3560000000	3170000000	3120000000	3250000000	3230000000	3260000000	3400000000	3270000000	3170000000	3160000000		3.32333e+09	3.24833e+09	0.977432
Q9VIE8	Q9VIE8_DROME	mAcon1	Aconitate hydratase, mitochondrial	3070000000	3320000000	3340000000	3250000000	3290000000	3350000000	3570000000	3510000000	3600000000	3660000000	3570000000	3760000000		3270000000	3.61167e+09	1.10449
Q9VKE2	Q9VKE2_DROME	Crys	Crystallin, isoform A	4860000000	1810000000	3120000000	3770000000	2630000000	3240000000	4730000000	2290000000	5610000000	4870000000	3610000000	3460000000		3.23833e+09	4095000000	1.26454
P00408	COX2_DROME	mt:CoII	Cytochrome c oxidase subunit 2	2910000000	3400000000	3310000000	3290000000	3100000000	3270000000	3000000000	3550000000	2880000000	3150000000	3050000000	3120000000		3.21333e+09	3125000000	0.97251
Q26416	CUA1_DROME	Acp1	Adult cuticle protein 1	2790000000	2390000000	2670000000	3410000000	4880000000	3140000000	4200000000	4490000000	3320000000	4430000000	4070000000	2830000000		3.21333e+09	3890000000	1.21058
P06754	TPM1_DROME	Tm1	Tropomyosin-1, isoforms 9A/A/B	3000000000	3360000000	2780000000	3090000000	3400000000	3390000000	3620000000	3090000000	3880000000	3570000000	3460000000	3080000000		3170000000	3450000000	1.08833
P06603;P06605	TBA1_DROME;TBA3_DROME	alphaTub84B;alphaTub84D	Tubulin alpha-1 chain	3150000000	3240000000	3130000000	2950000000	3430000000	2960000000	3630000000	3270000000	3840000000	3960000000	3790000000	3920000000		3.14333e+09	3735000000	1.18823
Q24560	TBB1_DROME	betaTub56D	Tubulin beta-1 chain	3400000000	2980000000	2910000000	3110000000	2910000000	2750000000	3050000000	2680000000	3100000000	2970000000	3170000000	3060000000		3010000000	3005000000	0.998339
Q24407	ATP5J_DROME	ATPsynCF6	ATP synthase-coupling factor 6, mitochondrial	2960000000	2760000000	2940000000	2890000000	3240000000	2820000000	2730000000	2600000000	2810000000	2690000000	2720000000	2880000000		2935000000	2.73833e+09	0.932993
Q94516	AT5F1_DROME	ATPsynB	ATP synthase subunit b, mitochondrial	2920000000	3000000000	2950000000	2460000000	2980000000	3070000000	3430000000	3520000000	3470000000	3580000000	3630000000	3420000000		2.89667e+09	3.50833e+09	1.21116
P11147	HSP7D_DROME	Hsc70-4	Heat shock 70 kDa protein cognate 4	2900000000	2890000000	2840000000	2700000000	2830000000	3070000000	2930000000	2780000000	3040000000	3080000000	2980000000	2820000000		2.87167e+09	2.93833e+09	1.02322
P54192	OB19D_DROME	Obp19d	General odorant-binding protein 19d	2780000000	3130000000	2890000000	2700000000	2550000000	3050000000	3170000000	2740000000	2500000000	3180000000	3210000000	3000000000		2850000000	2.96667e+09	1.04094
Q9XTL9	PYG_DROME	Glyp	Glycogen phosphorylase	2530000000	2910000000	3110000000	2550000000	2640000000	3040000000	2520000000	2500000000	2880000000	2900000000	2670000000	2350000000		2.79667e+09	2.63667e+09	0.942789
Q9VFF0	Q9VFF0_DROME	UQCR-C1	GH01077p	2850000000	2700000000	2840000000	2750000000	2730000000	2550000000	2750000000	2770000000	2630000000	2760000000	2750000000	2820000000		2.73667e+09	2.74667e+09	1.00365
Q24439	ATPO_DROME	ATPsynO	ATP synthase subunit O, mitochondrial	2860000000	2770000000	2630000000	2800000000	2640000000	2620000000	3200000000	3410000000	2840000000	2900000000	3210000000	3350000000		2720000000	3.15167e+09	1.1587
Q9VLX9	Q9VLX9_DROME	Dmel\CG7203	Uncharacterized protein, isoform B	1020000000	3680000000	2800000000	1840000000	2960000000	3810000000	4270000000	3840000000	4320000000	4840000000	4410000000	4740000000		2685000000	4.40333e+09	1.63998
Q9V496	APLP_DROME	apolpp	Apolipophorins	3250000000	3070000000	2460000000	2550000000	2330000000	2290000000	2450000000	2750000000	2210000000	2070000000	1820000000	1840000000		2.65833e+09	2190000000	0.823824
Q24251	ATP5H_DROME	ATPsynD	ATP synthase subunit d, mitochondrial	2580000000	2670000000	2520000000	2690000000	2700000000	2700000000	2720000000	2850000000	2740000000	2840000000	2730000000	2830000000		2.64333e+09	2785000000	1.05359
Q9W1C9	PEB3_DROME	EbpIII	Ejaculatory bulb-specific protein 3	2420000000	2590000000	2680000000	2510000000	2890000000	2740000000	2330000000	2250000000	2130000000	2190000000	2430000000	2400000000		2.63833e+09	2.28833e+09	0.86734
Q9W2X6	Q9W2X6_DROME	ATPsyndelta	ATP synthase, delta subunit, isoform A	2700000000	2710000000	2380000000	2630000000	2600000000	2570000000	2530000000	2820000000	2920000000	2910000000	2850000000	2860000000		2.59833e+09	2815000000	1.08339
P19351-12	TNNT_DROME	up	Isoform 12 of Troponin T, skeletal muscle	2130000000	3440000000	2190000000	2260000000	2560000000	3000000000	3050000000	2710000000	3190000000	2930000000	2720000000	2830000000		2.59667e+09	2905000000	1.11874
P35415	MYSP1_DROME	Prm	Paramyosin, long form	2320000000	2560000000	2530000000	2530000000	2680000000	2720000000	2990000000	2600000000	2980000000	3180000000	3080000000	3270000000		2.55667e+09	3.01667e+09	1.17992
Q7JUS9	Q7JUS9_DROME	Mpcp1	MIP16332p	2580000000	2670000000	2510000000	2620000000	2100000000	2170000000	2590000000	2620000000	2480000000	2390000000	2390000000	2570000000		2.44167e+09	2.50667e+09	1.02662
Q95RB2	Q95RB2_DROME	Cpr49Ae	Cuticular protein 49Ae	1900000000	2260000000	1950000000	1850000000	3020000000	3240000000	2990000000	1940000000	3170000000	3700000000	2750000000	3250000000		2370000000	2.96667e+09	1.25176
Q8IQW2	Q8IQW2_DROME	COX6B	Cytochrome c oxidase subunit	2640000000	2360000000	2340000000	2380000000	2290000000	2100000000	2040000000	2130000000	2060000000	2140000000	2120000000	2140000000		2.35167e+09	2105000000	0.89511
Q9VU35	Q9VU35_DROME	Dmel\CG11267	RH34413p	2390000000	2320000000	2380000000	2340000000	2210000000	2370000000	2410000000	2430000000	2420000000	2530000000	2470000000	2450000000		2335000000	2.45167e+09	1.04996
P20478-3	GLNA2_DROME	Gs2	Isoform B of Glutamine synthetase 2 cytoplasmic	2160000000	2370000000	2480000000	2360000000	2270000000	2270000000	2510000000	2360000000	2430000000	2460000000	2500000000	2390000000		2.31833e+09	2.44167e+09	1.0532
O62619;O62619-2	KPYK_DROME	Pyk	Pyruvate kinase	2020000000	2330000000	2400000000	2220000000	2200000000	2380000000	2350000000	2330000000	2540000000	2610000000	2340000000	2500000000		2.25833e+09	2445000000	1.08266
B7Z001	B7Z001_DROME	FASN1	Fatty acid synthase	2240000000	1990000000	2490000000	2150000000	2170000000	2460000000	2090000000	2200000000	2050000000	2130000000	2050000000	1810000000		2250000000	2055000000	0.913333
P36188-5	TNNI_DROME	wupA	Isoform 4 of Troponin I	2090000000	2480000000	2070000000	2190000000	2180000000	2320000000	2450000000	2230000000	2700000000	2510000000	2490000000	2530000000		2.22167e+09	2485000000	1.11853
Q24400	MLP2_DROME	Mlp84B	Muscle LIM protein Mlp84B	2290000000	2350000000	2530000000	2120000000	2040000000	1960000000	2630000000	2190000000	1910000000	2020000000	2240000000	2170000000		2215000000	2.19333e+09	0.990218
P25007	PPIA_DROME	Cyp1	Peptidyl-prolyl cis-trans isomerase	2150000000	2280000000	2080000000	2160000000	2210000000	2070000000	2010000000	2060000000	2030000000	1950000000	2060000000	2110000000		2.15833e+09	2.03667e+09	0.943629
Q9VHN7	Q9VHN7_DROME	anon-WO0118547.344	transketolase	2270000000	2060000000	2300000000	2080000000	2050000000	2170000000	1710000000	1770000000	1800000000	1900000000	1790000000	1590000000		2155000000	1760000000	0.816705
Q9VV75	Q9VV75_DROME	UQCR-C2	AT02348p	1920000000	2200000000	2220000000	2050000000	2120000000	2320000000	2320000000	2200000000	2350000000	2400000000	2210000000	2290000000		2.13833e+09	2295000000	1.07327
P08985	H2AV_DROME	His2Av	Histone H2A.v	1970000000	1870000000	2210000000	2060000000	2390000000	2280000000	2390000000	2150000000	2290000000	2190000000	2010000000	2400000000		2130000000	2.23833e+09	1.05086
Q8IQW5	Q8IQW5_DROME	HspB8	RE23625p	2090000000	2070000000	2060000000	2080000000	2270000000	2200000000	1980000000	2040000000	2030000000	2000000000	1970000000	2020000000		2.12833e+09	2.00667e+09	0.942835
Q9VAI9	Q9VAI9_DROME	Obp99c	GEO07291p1	2520000000	2390000000	1920000000	1790000000	2180000000	1940000000	1340000000	1450000000	1200000000	1230000000	1090000000	1110000000		2.12333e+09	1.23667e+09	0.582418
Q8MST5	Q8MST5_DROME	betaTub97EF	Tubulin beta chain	1970000000	2360000000	2280000000	2120000000	1860000000	2090000000	2300000000	2050000000	2490000000	2610000000	2440000000	2160000000		2.11333e+09	2.34167e+09	1.10804
P02844	VIT2_DROME	Yp2	Vitellogenin-2	2010000000	2080000000	2060000000	2040000000	2150000000	2230000000	2580000000	2470000000	2210000000	2240000000	1950000000	2190000000		2095000000	2.27333e+09	1.08512
M9PDX8	M9PDX8_DROME	nrv3	Nervana 3, isoform E	1860000000	2200000000	2180000000	2020000000	2050000000	2210000000	2300000000	2140000000	2120000000	2170000000	2220000000	2170000000		2.08667e+09	2.18667e+09	1.04792
P13706-2	GPDA_DROME	Gpdh1	Isoform GPDH-1 of Glycerol-3-phosphate dehydrogenase [NAD(+)], cytoplasmic	2020000000	2130000000	2150000000	1980000000	1950000000	2100000000	2430000000	2120000000	2760000000	2790000000	2610000000	2350000000		2055000000	2510000000	1.22141
Q960M4	Q960M4_DROME	Prx5	Peroxiredoxin-5	1990000000	1950000000	2170000000	2030000000	2100000000	1870000000	2010000000	2080000000	2000000000	2110000000	2140000000	2060000000		2.01833e+09	2.06667e+09	1.02395
P84029	CYC2_DROME	Cyt-c-p	Cytochrome c-2	1710000000	2020000000	2050000000	1950000000	2190000000	2180000000	2450000000	1600000000	3290000000	3490000000	3190000000	2970000000		2.01667e+09	2.83167e+09	1.40413
B7Z0E0;Q7KUB0;Q7KUB1;Q8IQA7;Q9VSI6	B7Z0E0_DROME;Q7KUB0_DROME;Q7KUB1_DROME;Q8IQA7_DROME;Q9VSI6_DROME	Idh	Isocitrate dehydrogenase [NADP]	1960000000	2120000000	2030000000	1920000000	1890000000	2120000000	1860000000	1980000000	1990000000	1890000000	1820000000	1750000000		2.00667e+09	1.88167e+09	0.937708
Q94522	SUCA_DROME	Scsalpha1	Succinate--CoA ligase [ADP/GDP-forming] subunit alpha, mitochondrial	2170000000	1730000000	2050000000	2040000000	2180000000	1800000000	1880000000	1960000000	1870000000	1840000000	1830000000	1800000000		1995000000	1.86333e+09	0.934002
Q0E8X7	Q0E8X7_DROME	roh	Reduction of Rh1, isoform A	1890000000	2090000000	2000000000	1720000000	1970000000	2110000000	2010000000	2040000000	2220000000	2180000000	2020000000	2090000000		1.96333e+09	2.09333e+09	1.06621
Q94514	COX5A_DROME	COX5A	Cytochrome c oxidase subunit 5A, mitochondrial	1550000000	2150000000	2020000000	1770000000	2170000000	2100000000	1770000000	1750000000	1890000000	1960000000	1950000000	1920000000		1960000000	1.87333e+09	0.955782
Q9W141;Q9W141-2	ATPK_DROME	ATPsynF	Putative ATP synthase subunit f, mitochondrial	2010000000	1950000000	2020000000	1950000000	1950000000	1850000000	1900000000	1710000000	1790000000	1660000000	1720000000	1860000000		1955000000	1.77333e+09	0.907076
Q9VV46	Q9VV46_DROME	Cpr72Ec	Cuticular protein 72Ec	2380000000	1190000000	1980000000	2200000000	1730000000	2220000000	2880000000	1430000000	3350000000	2920000000	2270000000	2210000000		1950000000	2510000000	1.28718
P12024	CHAO_DROME	chp	Chaoptin	2010000000	2070000000	1970000000	1990000000	1790000000	1790000000	2090000000	1860000000	2280000000	2190000000	2120000000	2260000000		1.93667e+09	2.13333e+09	1.10155
P45594	CADF_DROME	tsr	Cofilin/actin-depolymerizing factor homolog	1870000000	2050000000	2000000000	1910000000	2050000000	1720000000	2030000000	2070000000	1990000000	1990000000	1970000000	2050000000		1.93333e+09	2.01667e+09	1.0431
Q9VKX2	Q9VKX2_DROME	Mdh1	Malate dehydrogenase	2040000000	1810000000	2040000000	1690000000	1910000000	2030000000	1790000000	1890000000	1810000000	1860000000	1950000000	1790000000		1920000000	1.84833e+09	0.962674
Q9VAI6	OB99B_DROME	Obp99b	General odorant-binding protein 99b	1780000000	1840000000	1740000000	1660000000	2200000000	2000000000	1310000000	1510000000	1470000000	1440000000	1260000000	1270000000		1870000000	1.37667e+09	0.736185
P23625	GNAQ_DROME	Galphaq	G protein alpha q subunit	1890000000	1840000000	1920000000	1780000000	1920000000	1820000000	1790000000	1750000000	1710000000	1840000000	1830000000	1800000000		1.86167e+09	1.78667e+09	0.959714
Q8T4D6	Q8T4D6_DROME	mAcon2	Aconitate hydratase, mitochondrial	1740000000	2020000000	1570000000	1750000000	2030000000	1810000000	1870000000	2010000000	1820000000	1820000000	1830000000	2000000000		1820000000	1.89167e+09	1.03938
Q6NMY2	Q6NMY2_DROME	BEST:GH10831	RH54371p	1490000000	2080000000	1800000000	1820000000	1600000000	2120000000	1500000000	1530000000	2090000000	2190000000	1800000000	1800000000		1.81833e+09	1.81833e+09	1
P20354	GNAS_DROME	Galphas	G protein alpha s subunit	1870000000	1790000000	1840000000	1960000000	1690000000	1680000000	1990000000	1840000000	1820000000	2020000000	1980000000	1960000000		1805000000	1935000000	1.07202
Q9VKM3	Q9VKM3_DROME	ATPsynG	ATP synthase subunit	1700000000	1820000000	1950000000	1700000000	1690000000	1790000000	1850000000	1780000000	2010000000	1850000000	1820000000	1840000000		1775000000	1.85833e+09	1.04695
Q9VVU1	Q9VVU1_DROME	GH07925p	Short/branched chain specific acyl-CoA dehydrogenase, mitochondrial	1980000000	1720000000	1720000000	1740000000	1530000000	1870000000	1370000000	1350000000	1360000000	1360000000	1270000000	1330000000		1760000000	1340000000	0.761364
Q27331	VATA2_DROME	Vha68-2	V-type proton ATPase catalytic subunit A isoform 2	1700000000	1760000000	1760000000	1790000000	1720000000	1630000000	1820000000	1770000000	1930000000	1840000000	1840000000	1820000000		1.72667e+09	1.83667e+09	1.06371
Q9VWH4;Q9VWH4-2	IDH3A_DROME	Idh3a	Probable isocitrate dehydrogenase [NAD] subunit alpha, mitochondrial	1580000000	1690000000	1740000000	1620000000	1720000000	1740000000	1730000000	1660000000	1850000000	1830000000	1800000000	1870000000		1.68167e+09	1790000000	1.06442
P02828	HSP83_DROME	Hsp83	Heat shock protein 83	1600000000	1670000000	1640000000	1590000000	1660000000	1780000000	1710000000	1660000000	1690000000	1770000000	1700000000	1690000000		1.65667e+09	1.70333e+09	1.02817
P84051	H2A_DROME	His2A	Histone H2A	1390000000	1650000000	1400000000	1620000000	1790000000	2080000000	1540000000	1530000000	1710000000	1850000000	1610000000	1630000000		1655000000	1645000000	0.993958
P02843	VIT1_DROME	Yp1	Vitellogenin-1	1620000000	1730000000	1500000000	1540000000	1800000000	1690000000	2260000000	2200000000	1790000000	1730000000	1620000000	1920000000		1.64667e+09	1920000000	1.16599
Q03334	RS13_DROME	RpS13	Small ribosomal subunit protein uS15	1620000000	1490000000	1600000000	1550000000	1720000000	1860000000	1680000000	1590000000	1790000000	1740000000	1750000000	1680000000		1640000000	1705000000	1.03963
P62152	CALM_DROME	Cam	Calmodulin	1730000000	1660000000	1590000000	1500000000	1570000000	1690000000	1620000000	1500000000	1970000000	1910000000	1780000000	1610000000		1.62333e+09	1.73167e+09	1.06674
P13060	EF2_DROME	eEF2	Eukaryotic translation elongation factor 2	1630000000	1530000000	1690000000	1620000000	1660000000	1570000000	1480000000	1610000000	1420000000	1540000000	1520000000	1440000000		1.61667e+09	1.50167e+09	0.928866
P54385	DHE3_DROME	Gdh	Glutamate dehydrogenase, mitochondrial	1660000000	1710000000	1540000000	1720000000	1510000000	1560000000	1620000000	1590000000	1650000000	1610000000	1650000000	1540000000		1.61667e+09	1610000000	0.995876
P31409	VATB_DROME	Vha55	V-type proton ATPase subunit B	1700000000	1640000000	1610000000	1640000000	1560000000	1520000000	1780000000	1580000000	1780000000	1810000000	1800000000	1720000000		1.61167e+09	1745000000	1.08273
Q0E8E8	Q0E8E8_DROME	Mpcp2	MIP08013p1	1660000000	1660000000	1800000000	1810000000	1480000000	1250000000	1450000000	1770000000	1380000000	1460000000	1550000000	1420000000		1610000000	1505000000	0.934783
P48596	GCH1_DROME	Pu	GTP cyclohydrolase 1	1490000000	1670000000	1370000000	1520000000	1590000000	1980000000	1380000000	1020000000	1460000000	1530000000	1300000000	1180000000		1.60333e+09	1.31167e+09	0.818087
O01666	ATPG_DROME	ATPsyngamma	ATP synthase subunit gamma, mitochondrial	1610000000	1670000000	1630000000	1540000000	1580000000	1470000000	1640000000	1720000000	1610000000	1560000000	1690000000	1640000000		1.58333e+09	1.64333e+09	1.03789
Q9VQT8	Q9VQT8_DROME	IM33	Immune induced molecule 33, isoform A	1770000000	1500000000	1480000000	1350000000	1820000000	1560000000	1150000000	885000000	850000000	902000000	878000000	850000000		1580000000	9.19167e+08	0.581751
Q9VVH5	Q9VVH5_DROME	UQCR-Q	Cytochrome b-c1 complex subunit 8	1330000000	1130000000	1870000000	1490000000	1860000000	1700000000	1470000000	1810000000	1640000000	1750000000	1530000000	1460000000		1.56333e+09	1610000000	1.02985
P55830	RS3A_DROME	RpS3A	Small ribosomal subunit protein eS1	1620000000	1460000000	1640000000	1570000000	1550000000	1470000000	1320000000	1460000000	1370000000	1420000000	1350000000	1310000000		1.55167e+09	1.37167e+09	0.883996
Q9VA91	RS7_DROME	RpS7	Small ribosomal subunit protein eS7	1480000000	1560000000	1550000000	1500000000	1460000000	1740000000	1720000000	1580000000	1730000000	1750000000	1730000000	1540000000		1.54833e+09	1675000000	1.08181
A8JNU6	A8JNU6_DROME	Ogdh	2-oxoglutarate dehydrogenase, mitochondrial	1570000000	1600000000	1610000000	1560000000	1530000000	1400000000	1640000000	1590000000	1650000000	1640000000	1680000000	1720000000		1545000000	1.65333e+09	1.07012
P29829	GBB2_DROME	Gbeta76C	Guanine nucleotide-binding protein subunit beta-2	1310000000	1640000000	1570000000	1490000000	1510000000	1630000000	1650000000	1610000000	1680000000	1720000000	1750000000	1690000000		1525000000	1.68333e+09	1.10383
Q9VTP4	R10AB_DROME	RpL10Ab	Large ribosomal subunit protein uL1	1840000000	1320000000	1490000000	1600000000	1500000000	1350000000	1280000000	1350000000	1130000000	1190000000	1220000000	1210000000		1.51667e+09	1230000000	0.810989
Q9V3P0	PRDX2_DROME	Prx2	Peroxiredoxin 2	1440000000	1470000000	1590000000	1480000000	1500000000	1610000000	1530000000	1450000000	1650000000	1580000000	1550000000	1410000000		1515000000	1.52833e+09	1.0088
P55841	RL14_DROME	RpL14	Large ribosomal subunit protein eL14	1370000000	1490000000	1550000000	1430000000	1590000000	1570000000	1480000000	1460000000	1440000000	1360000000	1490000000	1410000000		1500000000	1440000000	0.96
Q3KN41	NRX1_DROME	Nrx-1	Neurexin 1	1460000000	1480000000	1570000000	1510000000	1510000000	1460000000	1650000000	1600000000	1700000000	1560000000	1570000000	1590000000		1.49833e+09	1.61167e+09	1.07564
Q8INA9	Q8INA9_DROME	Fas1	Fasciclin 1, isoform C	1470000000	1480000000	1500000000	1440000000	1540000000	1550000000	1540000000	1520000000	1630000000	1610000000	1520000000	1640000000		1.49667e+09	1.57667e+09	1.05345
Q9VTK9	Q9VTK9_DROME	Akr1B	Aldo-keto reductase 1B, isoform A	1500000000	1530000000	1590000000	1320000000	1460000000	1560000000	1060000000	1180000000	1160000000	1170000000	1150000000	1080000000		1.49333e+09	1.13333e+09	0.758929
P08570	RLA1_DROME	RpLP1	Large ribosomal subunit protein P1	1060000000	1600000000	1640000000	1290000000	1530000000	1790000000	1340000000	1460000000	1410000000	1450000000	1520000000	1480000000		1485000000	1.44333e+09	0.971942
P06607	VIT3_DROME	Yp3	Vitellogenin-3	1370000000	1660000000	1550000000	1380000000	1390000000	1510000000	2080000000	1980000000	1730000000	1700000000	1560000000	1780000000		1.47667e+09	1805000000	1.22235
Q01604	PGK_DROME	Pgk	Phosphoglycerate kinase	1540000000	1420000000	1500000000	1480000000	1420000000	1450000000	1410000000	1420000000	1480000000	1470000000	1480000000	1370000000		1.46833e+09	1.43833e+09	0.979569
Q9W1N3	Q9W1N3_DROME	levy	Levy, isoform A	1680000000	1420000000	1510000000	1380000000	1340000000	1350000000	1480000000	1200000000	1010000000	1380000000	1300000000	1340000000		1.44667e+09	1285000000	0.888249
Q9VMB9	Q9VMB9_DROME	COX5B	Cytochrome c oxidase subunit 5B, isoform A	1410000000	1530000000	1450000000	1280000000	1490000000	1510000000	1270000000	1200000000	1530000000	1400000000	1230000000	1560000000		1445000000	1365000000	0.944637
Q9W237	RS16_DROME	RpS16	Small ribosomal subunit protein uS9	1530000000	1400000000	1540000000	1360000000	1370000000	1450000000	1340000000	1380000000	1270000000	1300000000	1310000000	1270000000		1.44167e+09	1.31167e+09	0.909827
P20432	GSTD1_DROME	GstD1	Glutathione S-transferase D1	1340000000	1520000000	1490000000	1450000000	1380000000	1460000000	1530000000	1500000000	1500000000	1500000000	1670000000	1560000000		1440000000	1.54333e+09	1.07176
Q02748	IF4A_DROME	eIF4A	Eukaryotic initiation factor 4A	1480000000	1460000000	1430000000	1420000000	1380000000	1440000000	1420000000	1370000000	1440000000	1480000000	1430000000	1390000000		1435000000	1.42167e+09	0.990708
P55935	RS9_DROME	RpS9	Small ribosomal subunit protein uS4	1400000000	1330000000	1380000000	1390000000	1460000000	1610000000	1300000000	1370000000	1470000000	1480000000	1400000000	1350000000		1.42833e+09	1395000000	0.976663
P41093	RL18A_DROME	RpL18A	Large ribosomal subunit protein eL20	1240000000	1490000000	1440000000	1400000000	1450000000	1460000000	1240000000	1300000000	1320000000	1370000000	1260000000	1250000000		1.41333e+09	1290000000	0.912736
Q9VLC5	Q9VLC5_DROME	Aldh	Aldehyde dehydrogenase	1360000000	1380000000	1490000000	1380000000	1320000000	1500000000	1500000000	1430000000	1520000000	1570000000	1540000000	1410000000		1405000000	1495000000	1.06406
A1Z8Z3	A1Z8Z3_DROME	Cpr49Ag	Cuticular protein 49Ag	1460000000	1380000000	1210000000	1400000000	1420000000	1530000000	1400000000	1260000000	1590000000	1440000000	1310000000	1490000000		1400000000	1415000000	1.01071
P41126	RL13_DROME	RpL13	Large ribosomal subunit protein eL13	1390000000	1330000000	1410000000	1350000000	1400000000	1470000000	1220000000	1380000000	1260000000	1280000000	1320000000	1230000000		1.39167e+09	1.28167e+09	0.920958
Q9I7S8	PUR6_DROME	Paics	Bifunctional phosphoribosylaminoimidazole carboxylase/phosphoribosylaminoimidazole succinocarboxamide synthetase	1330000000	1490000000	1630000000	1220000000	1190000000	1460000000	1320000000	1140000000	1430000000	1520000000	1600000000	1170000000		1.38667e+09	1.36333e+09	0.983173
Q9W5R8	RL5_DROME	RpL5	Large ribosomal subunit protein uL18	1300000000	1350000000	1400000000	1330000000	1300000000	1490000000	1330000000	1400000000	1430000000	1380000000	1360000000	1290000000		1.36167e+09	1365000000	1.00245
P02516	HSP23_DROME	Hsp23	Heat shock protein 23	1410000000	1400000000	1310000000	1310000000	1320000000	1400000000	1060000000	952000000	1020000000	931000000	1010000000	1110000000		1.35833e+09	1.01383e+09	0.74638
Q500Y7	Q500Y7_DROME	UQCR-6.4	GEO11443p1	1360000000	1240000000	1450000000	1320000000	1280000000	1360000000	1510000000	1460000000	1230000000	1250000000	1400000000	1380000000		1335000000	1.37167e+09	1.02747
P19889	RLA0_DROME	RpLP0	Large ribosomal subunit protein uL10	1370000000	1250000000	1380000000	1310000000	1320000000	1360000000	1150000000	1330000000	1170000000	1220000000	1260000000	1230000000		1.33167e+09	1.22667e+09	0.921151
Q9VXI6	Q9VXI6_DROME	UQCR-14	Cytochrome b-c1 complex subunit 7	1100000000	1550000000	1300000000	1240000000	1240000000	1540000000	1590000000	1490000000	1700000000	1750000000	1490000000	1550000000		1.32833e+09	1595000000	1.20075
Q9VGQ1	Q9VGQ1_DROME	Dlst	Dihydrolipoyllysine-residue succinyltransferase component of 2-oxoglutarate dehydrogenase complex, mitochondrial	1290000000	1330000000	1350000000	1330000000	1300000000	1330000000	1310000000	1270000000	1260000000	1330000000	1330000000	1320000000		1.32167e+09	1.30333e+09	0.986129
Q9VRL0	Q9VRL0_DROME	Cyt-c1	Cytochrome c1, isoform A	1310000000	1450000000	1420000000	1420000000	1150000000	1140000000	1590000000	1330000000	1720000000	1810000000	1650000000	1680000000		1315000000	1630000000	1.23954
Q7JR58	Q7JR58_DROME	Echs1	Enoyl-CoA hydratase, mitochondrial	1380000000	1200000000	1410000000	1250000000	1280000000	1360000000	1340000000	1350000000	1260000000	1280000000	1420000000	1160000000		1.31333e+09	1.30167e+09	0.991117
Q9VMS1	Q9VMS1_DROME	cype	Cyclope, isoform A	1280000000	1340000000	1250000000	1410000000	1300000000	1260000000	1180000000	1170000000	1220000000	1150000000	1150000000	1260000000		1.30667e+09	1.18833e+09	0.909439
Q9VV28	NPLP3_DROME	Nplp3	Neuropeptide-like 3	1370000000	831000000	1570000000	1350000000	1490000000	1220000000	1780000000	1520000000	1830000000	1850000000	1890000000	2050000000		1.30517e+09	1820000000	1.39446
Q9XYZ9	Q9XYZ9_DROME	GstE12	Glutathione S transferase E12, isoform A	1330000000	1300000000	1270000000	1320000000	1270000000	1300000000	1200000000	1190000000	1230000000	1270000000	1240000000	1230000000		1.29833e+09	1.22667e+09	0.944801
A8DRW0	A8DRW0_DROME	Cpr49Aa	Cuticular protein 49Aa	1200000000	1220000000	984000000	1110000000	1880000000	1370000000	1170000000	1000000000	1260000000	1620000000	1140000000	1450000000		1294000000	1.27333e+09	0.984029
P48588	RS25_DROME	RpS25	Small ribosomal subunit protein eS25	1240000000	1180000000	1270000000	1260000000	1360000000	1410000000	1160000000	1180000000	1150000000	1140000000	1170000000	1240000000		1.28667e+09	1.17333e+09	0.911917
P48149	RS15A_DROME	RpS15Aa	Small ribosomal subunit protein uS8A	1290000000	1420000000	1400000000	1260000000	1170000000	1150000000	1110000000	1160000000	1090000000	1180000000	1240000000	1260000000		1.28167e+09	1.17333e+09	0.915475
Q8MT18	Q8MT18_DROME	Idh3g	RH49423p	1320000000	1260000000	1190000000	1300000000	1310000000	1280000000	1240000000	1230000000	1280000000	1300000000	1260000000	1310000000		1.27667e+09	1270000000	0.994778
Q9W334	RS28_DROME	RpS28b	Small ribosomal subunit protein eS28	1290000000	1200000000	1280000000	1270000000	1310000000	1290000000	1090000000	1160000000	1120000000	1210000000	1190000000	1090000000		1.27333e+09	1.14333e+09	0.897906
P39018	RS19A_DROME	RpS19a	Small ribosomal subunit protein eS19A	1240000000	1280000000	1390000000	1250000000	1250000000	1200000000	1210000000	1190000000	1230000000	1250000000	1200000000	1250000000		1.26833e+09	1.22167e+09	0.963206
Q9VLY1	Q9VLY1_DROME	Dmel\CG7214	HL02931p	1070000000	950000000	1250000000	1140000000	1840000000	1290000000	1050000000	1110000000	1250000000	1870000000	1880000000	2500000000		1.25667e+09	1610000000	1.28117
Q7K5K3	ODPB_DROME	Pdhb	Pyruvate dehydrogenase E1 component subunit beta, mitochondrial	1170000000	1230000000	1270000000	1240000000	1320000000	1200000000	1270000000	1360000000	1360000000	1300000000	1360000000	1220000000		1.23833e+09	1.31167e+09	1.05922
A0A0B4JCW4;Q9VHJ8	A0A0B4JCW4_DROME;Q9VHJ8_DROME	ScsbetaA	Succinate--CoA ligase [ADP-forming] subunit beta, mitochondrial	1180000000	1290000000	1240000000	1200000000	1210000000	1300000000	1310000000	1320000000	1270000000	1380000000	1250000000	1390000000		1.23667e+09	1320000000	1.06739
O18404	HCD2_DROME	scu	3-hydroxyacyl-CoA dehydrogenase type-2	1380000000	1160000000	1230000000	1210000000	1170000000	1250000000	1270000000	1220000000	1300000000	1290000000	1230000000	1180000000		1.23333e+09	1.24833e+09	1.01216
Q9VW68	Q9VW68_DROME	Gabat	(S)-3-amino-2-methylpropionate transaminase	1190000000	1320000000	1240000000	1230000000	1210000000	1180000000	1260000000	1220000000	1270000000	1300000000	1320000000	1290000000		1.22833e+09	1.27667e+09	1.03935
Q06559	RS3_DROME	RpS3	Small ribosomal subunit protein uS3	1310000000	1150000000	1300000000	1230000000	1140000000	1160000000	1040000000	1190000000	1090000000	1100000000	1130000000	1060000000		1215000000	1.10167e+09	0.906722
Q9VBH8;Q9VHE5	Q9VBH8_DROME;Q9VHE5_DROME	RpL34a;RpL34b	Large ribosomal subunit protein eL34	1240000000	1180000000	1170000000	1140000000	1220000000	1330000000	1110000000	1240000000	1180000000	1050000000	995000000	986000000		1.21333e+09	1093500000	0.901236
P41374	IF2A_DROME	eIF2alpha	Eukaryotic translation initiation factor 2 subunit 1	1320000000	1190000000	1230000000	1250000000	1130000000	1150000000	1170000000	1230000000	1200000000	1170000000	1180000000	1170000000		1.21167e+09	1.18667e+09	0.979367
Q9VAN7	Q9VAN7_DROME	Pglym78	Phosphoglycerate mutase	1190000000	1290000000	1200000000	1110000000	1160000000	1240000000	1460000000	1450000000	1400000000	1430000000	1340000000	1410000000		1.19833e+09	1415000000	1.18081
P25843	PROF_DROME	chic	Profilin	870000000	1410000000	1230000000	1070000000	1240000000	1280000000	1420000000	1380000000	1160000000	1210000000	1280000000	1260000000		1.18333e+09	1285000000	1.08592
Q9VSW1	Q9VSW1_DROME	UGP	UTP--glucose-1-phosphate uridylyltransferase	1120000000	1170000000	1290000000	1020000000	1100000000	1330000000	1170000000	1150000000	1210000000	1230000000	1100000000	1070000000		1.17167e+09	1155000000	0.985775
P06754-1	TPM1_DROME	Tm1	Isoform D of Tropomyosin-1, isoforms 9A/A/B	1010000000	1280000000	1060000000	1040000000	1380000000	1200000000	1190000000	1280000000	1510000000	1310000000	1310000000	1260000000		1.16167e+09	1310000000	1.12769
P26308	GBB1_DROME	Gbeta13F	Guanine nucleotide-binding protein subunit beta-1	1180000000	1070000000	1200000000	1130000000	1200000000	1150000000	1120000000	1100000000	1090000000	1240000000	1260000000	1150000000		1155000000	1160000000	1.00433
Q9VBU9	Q9VBU9_DROME	RpS27	40S ribosomal protein S27	1220000000	1080000000	1120000000	1140000000	1130000000	1180000000	897000000	1090000000	952000000	1020000000	1020000000	914000000		1145000000	9.82167e+08	0.857787
P22464-3	ANXB9_DROME	AnxB9	Isoform c of Annexin B9	1140000000	1120000000	1070000000	1120000000	1130000000	1180000000	1200000000	1120000000	1090000000	1200000000	1130000000	1180000000		1.12667e+09	1.15333e+09	1.02367
P41042	RS4_DROME	RpS4	Small ribosomal subunit protein eS4	1110000000	1100000000	1130000000	1120000000	1010000000	1230000000	1080000000	1120000000	1120000000	1120000000	1110000000	1060000000		1.11667e+09	1.10167e+09	0.986567
Q9VNX4	Q9VNX4_DROME	P5CDh1	Multifunctional fusion protein	1130000000	1110000000	1120000000	1150000000	1080000000	1090000000	1070000000	1140000000	1170000000	1100000000	1130000000	1130000000		1.11333e+09	1.12333e+09	1.00898
P16378;P16378-2	GNAO_DROME	Galphao	G protein alpha o subunit	1100000000	1070000000	1080000000	1190000000	1120000000	1110000000	1190000000	1240000000	1210000000	1240000000	1220000000	1260000000		1.11167e+09	1.22667e+09	1.10345
P54611	VATE_DROME	Vha26	V-type proton ATPase subunit E	1180000000	1070000000	1000000000	1090000000	1200000000	1090000000	1090000000	1150000000	1140000000	1190000000	1170000000	1170000000		1105000000	1.15167e+09	1.04223
Q9VII1;Q9VII1-2	BERO_DROME	bero	UPAR/Ly6 domain-containing protein bero	1060000000	1060000000	1090000000	1140000000	1020000000	1200000000	1110000000	993000000	1320000000	1170000000	1150000000	1180000000		1095000000	1.15383e+09	1.05373
P54399	PDI_DROME	Pdi	Protein disulfide-isomerase	1100000000	1030000000	1170000000	1070000000	1090000000	1100000000	1040000000	956000000	968000000	1050000000	1070000000	972000000		1.09333e+09	1.00933e+09	0.923171
P29613;P29613-1	TPIS_DROME	Tpi	Triosephosphate isomerase	1070000000	1040000000	1090000000	1040000000	1140000000	1150000000	995000000	1070000000	1080000000	1040000000	1030000000	1080000000		1.08833e+09	1.04917e+09	0.964012
O96827	EF1B_DROME	eEF1beta	Probable elongation factor 1-beta	1060000000	1060000000	1100000000	1120000000	1110000000	1000000000	919000000	1000000000	926000000	993000000	993000000	961000000		1075000000	9.65333e+08	0.897984
Q9Y119	Q9Y119_DROME	Tps1	BcDNA.GH08860	1070000000	1040000000	1260000000	931000000	1000000000	1070000000	1430000000	1470000000	1470000000	1460000000	1350000000	1230000000		1.06183e+09	1.40167e+09	1.32004
E1JHT6	E1JHT6_DROME	Rtnl1	Reticulon-like protein	1020000000	1130000000	1110000000	1000000000	981000000	1080000000	1220000000	1110000000	1130000000	1200000000	1180000000	1120000000		1053500000	1160000000	1.10109
Q9V9M7	Q9V9M7_DROME	RpL21	60S ribosomal protein L21	1100000000	1050000000	1020000000	905000000	1070000000	1120000000	932000000	997000000	919000000	957000000	968000000	957000000		1.04417e+09	955000000	0.914605
Q9VQ61	Q9VQ61_DROME	Got2	Aspartate aminotransferase	1040000000	934000000	1090000000	1070000000	1010000000	1070000000	810000000	803000000	855000000	813000000	851000000	784000000		1.03567e+09	8.19333e+08	0.791117
Q9VM14	Q9VM14_DROME	muc	dihydrolipoyllysine-residue acetyltransferase	978000000	1170000000	920000000	1030000000	982000000	1110000000	900000000	814000000	1010000000	986000000	986000000	1070000000		1.03167e+09	961000000	0.931502
Q9VD58	Q9VD58_DROME	Idh3b	GH26270p	1090000000	1050000000	1070000000	984000000	976000000	1010000000	1150000000	1160000000	1280000000	1200000000	1170000000	1130000000		1030000000	1.18167e+09	1.14725
Q9V597	RL31_DROME	RpL31	Large ribosomal subunit protein eL31	1060000000	989000000	1030000000	1080000000	989000000	1010000000	844000000	863000000	897000000	876000000	898000000	928000000		1.02633e+09	8.84333e+08	0.861643
O97428	O97428_DROME	cib	Ciboulot, isoform A	977000000	999000000	996000000	1060000000	1060000000	1060000000	1010000000	1010000000	1050000000	1020000000	1050000000	1060000000		1.02533e+09	1.03333e+09	1.0078
P09491-2	TPM2_DROME	Tm2	Isoform Embryonic of Tropomyosin-2	965000000	1240000000	843000000	905000000	1070000000	1120000000	1250000000	1060000000	1470000000	1390000000	1230000000	1180000000		1.02383e+09	1.26333e+09	1.23392
P23779	CYTL_DROME	Cys	Cystatin-like protein	1010000000	1160000000	938000000	851000000	1090000000	1090000000	496000000	571000000	647000000	558000000	462000000	510000000		1.02317e+09	5.40667e+08	0.528425
Q24048	ATPB2_DROME	nrv2	Sodium/potassium-transporting ATPase subunit beta-2	906000000	1090000000	1210000000	1140000000	993000000	771000000	1300000000	1020000000	1380000000	1360000000	1330000000	1290000000		1.01833e+09	1280000000	1.25696
Q00637	SODM_DROME	Sod2	Superoxide dismutase [Mn], mitochondrial	967000000	996000000	1060000000	1060000000	1010000000	997000000	980000000	921000000	932000000	950000000	1030000000	971000000		1015000000	964000000	0.949754
O18332	O18332_DROME	Rab1	FI01544p	908000000	1070000000	1020000000	980000000	1000000000	1080000000	1130000000	1080000000	1150000000	1160000000	1060000000	1070000000		1.00967e+09	1.10833e+09	1.09772
P09180	RL4_DROME	RpL4	Large ribosomal subunit protein uL4	869000000	1040000000	1010000000	946000000	996000000	1150000000	878000000	899000000	873000000	884000000	876000000	861000000		1.00183e+09	878500000	0.876892
Q9VWG3	RS10B_DROME	RpS10b	Small ribosomal subunit protein eS10B	1090000000	980000000	1000000000	945000000	947000000	1030000000	1060000000	955000000	1040000000	1060000000	1040000000	1040000000		9.98667e+08	1032500000	1.03388
Q0E9E2;Q7KN97	Q0E9E2_DROME;Q7KN97_DROME	Pcb	Pyruvate carboxylase	998000000	942000000	1050000000	953000000	966000000	1050000000	1030000000	984000000	1010000000	1020000000	1040000000	912000000		9.93167e+08	9.99333e+08	1.00621
Q94523	SDHA_DROME	SdhA	Succinate dehydrogenase [ubiquinone] flavoprotein subunit, mitochondrial	962000000	1050000000	1010000000	957000000	971000000	996000000	1090000000	1040000000	1170000000	1100000000	1160000000	1160000000		991000000	1120000000	1.13017
Q960T2-5	SAP47_DROME	Sap47	Isoform G of Synapse-associated protein of 47 kDa	689000000	1220000000	1020000000	836000000	1010000000	1150000000	1210000000	1030000000	1190000000	1180000000	1100000000	1130000000		987500000	1140000000	1.15443
Q9W5W8	Q9W5W8_DROME	Dmel\CG9577	RE22677p	1070000000	929000000	984000000	978000000	999000000	942000000	953000000	840000000	1080000000	1110000000	962000000	935000000		9.83667e+08	980000000	0.996272
O77460	IPYR_DROME	Nurf-38	Inorganic pyrophosphatase	955000000	987000000	1010000000	911000000	959000000	1080000000	1030000000	1110000000	1070000000	1070000000	1080000000	1020000000		9.83667e+08	1.06333e+09	1.08099
O18640	GBLP_DROME	Rack1	Small ribosomal subunit protein RACK1	832000000	1100000000	1040000000	871000000	955000000	1100000000	1010000000	966000000	1050000000	1020000000	1040000000	957000000		983000000	1.00717e+09	1.02458
Q9V427	INX2_DROME	Inx2	Innexin inx2	1120000000	1000000000	1030000000	1030000000	839000000	848000000	1040000000	1020000000	934000000	994000000	1050000000	1030000000		9.77833e+08	1.01133e+09	1.03426
P29310-2	1433Z_DROME	14-3-3zeta	Isoform VI' of 14-3-3 protein zeta	1090000000	844000000	943000000	1040000000	987000000	936000000	877000000	927000000	970000000	789000000	885000000	913000000		9.73333e+08	893500000	0.917979
Q94519-2	ACPM_DROME	ND-ACP	Isoform 1 of Acyl carrier protein, mitochondrial	980000000	995000000	990000000	977000000	990000000	880000000	897000000	927000000	911000000	957000000	917000000	902000000		9.68667e+08	918500000	0.948211
P15372	ARRA_DROME	Arr1	Phosrestin-2	987000000	914000000	1020000000	956000000	1060000000	861000000	806000000	884000000	838000000	771000000	841000000	862000000		9.66333e+08	8.33667e+08	0.862711
Q0KHZ6	Q0KHZ6_DROME	Etfb	Electron transfer flavoprotein subunit beta	956000000	888000000	1000000000	1000000000	1020000000	922000000	938000000	1010000000	939000000	966000000	1010000000	937000000		9.64333e+08	9.66667e+08	1.00242
P50882	RL9_DROME	RpL9	Large ribosomal subunit protein uL6	982000000	931000000	1000000000	993000000	901000000	913000000	822000000	897000000	797000000	857000000	836000000	814000000		9.53333e+08	8.37167e+08	0.878147
P05389	RLA2_DROME	RpLP2	Large ribosomal subunit protein P2	1010000000	1110000000	1090000000	1040000000	810000000	612000000	1380000000	947000000	1340000000	1330000000	1290000000	1170000000		9.45333e+08	1.24283e+09	1.3147
Q9VKI8	Q9VKI8_DROME	GH26	GH03305p	1030000000	934000000	955000000	924000000	864000000	919000000	826000000	921000000	867000000	921000000	958000000	815000000		9.37667e+08	8.84667e+08	0.943477
C0HK94	Y5078_DROME	CG45078	Uncharacterized protein CG45078	823000000	963000000	932000000	977000000	940000000	968000000	936000000	875000000	999000000	921000000	883000000	929000000		9.33833e+08	9.23833e+08	0.989291
Q9VQ29	UCRI_DROME	RFeSP	Cytochrome b-c1 complex subunit Rieske, mitochondrial	930000000	883000000	948000000	995000000	944000000	809000000	876000000	929000000	991000000	1010000000	946000000	956000000		9.18167e+08	9.51333e+08	1.03612
Q9W1B9	Q9W1B9_DROME	RpL12	Large ribosomal subunit protein uL11	1030000000	836000000	989000000	982000000	815000000	841000000	1100000000	1220000000	1180000000	1030000000	1160000000	1180000000		915500000	1145000000	1.25068
Q9VQM2	Q9VQM2_DROME	ND-B14.5B	NADH dehydrogenase [ubiquinone] 1 subunit C2	914000000	976000000	906000000	848000000	859000000	962000000	847000000	745000000	929000000	898000000	762000000	912000000		9.10833e+08	8.48833e+08	0.93193
Q7KVX5;Q9W4N8	Q7KVX5_DROME;Q9W4N8_DROME	Vap33	VAMP-associated protein 33kDa, isoform A	975000000	806000000	944000000	913000000	857000000	957000000	1050000000	1030000000	1100000000	1070000000	1060000000	1040000000		9.08667e+08	1.05833e+09	1.16471
A1Z7S3	A1Z7S3_DROME	Rab32	Rab32, isoform B	925000000	880000000	953000000	923000000	918000000	832000000	917000000	932000000	893000000	926000000	945000000	916000000		9.05167e+08	921500000	1.01804
Q9W303	IDGF4_DROME	Idgf4	Chitinase-like protein Idgf4	913000000	1000000000	851000000	822000000	940000000	899000000	830000000	822000000	877000000	857000000	804000000	794000000		9.04167e+08	8.30667e+08	0.91871
Q04499-5	PROD_DROME	slgA	Isoform E of Proline dehydrogenase 1, mitochondrial	888000000	720000000	892000000	1110000000	957000000	797000000	1160000000	1400000000	1070000000	966000000	1200000000	1110000000		894000000	1151000000	1.28747
Q9W227	Q9W227_DROME	Dmel\CG2852	Peptidyl-prolyl cis-trans isomerase	960000000	842000000	908000000	828000000	913000000	893000000	746000000	775000000	707000000	743000000	723000000	753000000		8.90667e+08	7.41167e+08	0.832148
Q9V429	THIO2_DROME	Trx2	Thioredoxin-2	1000000000	897000000	839000000	825000000	880000000	854000000	882000000	897000000	989000000	994000000	973000000	969000000		882500000	9.50667e+08	1.07724
O97102	O97102_DROME	Sumo	Small ubiquitin-related modifier	762000000	870000000	849000000	871000000	990000000	929000000	921000000	943000000	1020000000	958000000	1070000000	970000000		878500000	9.80333e+08	1.11592
Q7KN94	Q7KN94_DROME	wal	Electron transfer flavoprotein subunit alpha	923000000	841000000	881000000	881000000	869000000	859000000	834000000	863000000	724000000	830000000	824000000	856000000		8.75667e+08	8.21833e+08	0.938523
E1JJA4	E1JJA4_DROME	shi	dynamin GTPase	843000000	884000000	892000000	848000000	880000000	902000000	984000000	969000000	1060000000	1030000000	1030000000	1010000000		8.74833e+08	1.01383e+09	1.15889
P61851	SODC_DROME	Sod1	Superoxide dismutase [Cu-Zn]	924000000	843000000	850000000	941000000	871000000	807000000	775000000	727000000	816000000	819000000	788000000	795000000		8.72667e+08	7.86667e+08	0.901451
Q9VG31;Q9VG32	Q9VG31_DROME;Q9VG32_DROME	Men	Malic enzyme	960000000	906000000	887000000	863000000	742000000	807000000	777000000	786000000	741000000	742000000	750000000	715000000		8.60833e+08	7.51833e+08	0.873379
P29844	BIP_DROME	Hsc70-3	Endoplasmic reticulum chaperone BiP	840000000	846000000	869000000	845000000	853000000	909000000	904000000	832000000	923000000	914000000	899000000	926000000		8.60333e+08	8.99667e+08	1.04572
Q9VSL3	SEPIA_DROME	se	Pyrimidodiazepine synthase	795000000	1000000000	837000000	738000000	853000000	934000000	898000000	858000000	1010000000	961000000	932000000	904000000		859500000	9.27167e+08	1.07873
Q3YMU0	Q3YMU0_DROME	ERp60	Protein disulfide-isomerase (Fragment)	818000000	871000000	860000000	877000000	871000000	857000000	832000000	864000000	813000000	881000000	835000000	841000000		859000000	8.44333e+08	0.982926
Q94511	NDUS1_DROME	ND-75	NADH-ubiquinone oxidoreductase 75 kDa subunit, mitochondrial	894000000	876000000	816000000	848000000	828000000	862000000	847000000	862000000	889000000	858000000	846000000	851000000		854000000	8.58833e+08	1.00566
Q9V3G1	RL8_DROME	RpL8	Large ribosomal subunit protein uL2	702000000	937000000	815000000	730000000	812000000	1100000000	891000000	837000000	955000000	827000000	873000000	827000000		8.49333e+08	8.68333e+08	1.02237
Q9VJY6	RL24_DROME	RpL24	Large ribosomal subunit protein eL24	829000000	837000000	894000000	808000000	830000000	859000000	635000000	749000000	661000000	653000000	739000000	658000000		8.42833e+08	682500000	0.809769
P18091-3	ACTN_DROME	Actn	Isoform Larval muscle of Alpha-actinin, sarcomeric	748000000	932000000	864000000	764000000	822000000	918000000	887000000	870000000	961000000	937000000	900000000	910000000		8.41333e+08	9.10833e+08	1.08261
Q95RI5	FAXC_DROME	fax	Failed axon connections	915000000	770000000	912000000	862000000	782000000	807000000	937000000	880000000	974000000	928000000	989000000	908000000		8.41333e+08	936000000	1.11252
Q9VSN3	Q9VSN3_DROME	Cpr66D	Cuticular protein 66D	898000000	665000000	868000000	846000000	843000000	904000000	670000000	563000000	717000000	693000000	628000000	578000000		8.37333e+08	641500000	0.766123
Q9W369	TANN_DROME	t	Beta-alanyl-dopamine/carcinine hydrolase	862000000	865000000	855000000	796000000	801000000	839000000	865000000	859000000	892000000	874000000	936000000	894000000		8.36333e+08	8.86667e+08	1.06018
Q9VBN5	Q9VBN5_DROME	RpL27	60S ribosomal protein L27	823000000	788000000	822000000	775000000	866000000	935000000	857000000	927000000	942000000	891000000	862000000	910000000		8.34833e+08	8.98167e+08	1.07586
P13008	RS26_DROME	RpS26	Small ribosomal subunit protein eS26	605000000	835000000	948000000	695000000	924000000	970000000	873000000	952000000	751000000	720000000	794000000	875000000		829500000	827500000	0.997589
O02649	CH60A_DROME	Hsp60A	Heat shock protein 60A	857000000	813000000	808000000	793000000	818000000	870000000	754000000	734000000	733000000	755000000	789000000	744000000		826500000	751500000	0.909256
Q8IPE8	Q8IPE8_DROME	Mtpalpha	enoyl-CoA hydratase	836000000	771000000	849000000	865000000	834000000	796000000	947000000	926000000	976000000	955000000	960000000	882000000		8.25167e+08	941000000	1.14038
P08928	LAM0_DROME	Lam	Lamin Dm0	745000000	861000000	803000000	788000000	836000000	896000000	978000000	899000000	1030000000	1010000000	976000000	1030000000		821500000	9.87167e+08	1.20166
Q8IRQ5	Q8IRQ5_DROME	Fum1	fumarate hydratase	840000000	832000000	759000000	809000000	801000000	854000000	765000000	733000000	818000000	802000000	825000000	776000000		8.15833e+08	786500000	0.964045
Q8SYJ2	Q8SYJ2_DROME	ND-MLRQ	GEO09626p1	557000000	914000000	898000000	674000000	852000000	1000000000	842000000	884000000	891000000	874000000	859000000	824000000		8.15833e+08	8.62333e+08	1.057
Q9VGS2	TCTP_DROME	Tctp	Translationally-controlled tumor protein homolog	887000000	716000000	909000000	815000000	807000000	696000000	674000000	793000000	689000000	672000000	710000000	696000000		805000000	7.05667e+08	0.876605
O77134	O77134_DROME	ATPsynE	ATP synthase subunit e, mitochondrial	747000000	835000000	821000000	701000000	765000000	919000000	973000000	707000000	810000000	533000000	699000000	823000000		798000000	757500000	0.949248
Q9Y112	Q9Y112_DROME	Akr2E3	BcDNA.GH10614	776000000	805000000	828000000	756000000	817000000	803000000	851000000	790000000	831000000	811000000	818000000	786000000		797500000	814500000	1.02132
Q9TVP3	JDP_DROME	jdp	J domain-containing protein	744000000	905000000	892000000	668000000	709000000	859000000	1080000000	864000000	1080000000	1060000000	1080000000	985000000		7.96167e+08	1.02483e+09	1.28721
Q9NJH0	EF1G_DROME	eEF1gamma	Elongation factor 1-gamma	798000000	787000000	826000000	810000000	751000000	782000000	736000000	699000000	720000000	745000000	724000000	713000000		7.92333e+08	7.22833e+08	0.912284
Q02645-2	HTS_DROME	hts	Isoform B of Protein hu-li tai shao	712000000	813000000	791000000	772000000	812000000	834000000	870000000	835000000	901000000	868000000	845000000	893000000		789000000	8.68667e+08	1.10097
A1Z8H1	A1Z8H1_DROME	Cpr47Ea	Cuticular protein 47Ea	780000000	648000000	690000000	782000000	972000000	856000000	864000000	643000000	842000000	1020000000	683000000	901000000		788000000	825500000	1.04759
P20228	DCE_DROME	Gad1	Glutamate decarboxylase	859000000	781000000	748000000	801000000	771000000	758000000	887000000	818000000	821000000	832000000	903000000	796000000		7.86333e+08	8.42833e+08	1.07185
Q9XY35	QCR9_DROME	ox	Cytochrome b-c1 complex subunit 9	780000000	770000000	666000000	917000000	858000000	718000000	858000000	1030000000	882000000	956000000	939000000	948000000		7.84833e+08	935500000	1.19197
P48375	FKB12_DROME	Fkbp12	Peptidyl-prolyl cis-trans isomerase Fkbp12	821000000	666000000	698000000	814000000	874000000	820000000	808000000	799000000	830000000	856000000	810000000	834000000		7.82167e+08	8.22833e+08	1.05199
Q9VYR1	Q9VYR1_DROME	regucalcin	Regucalcin homologue	692000000	804000000	805000000	820000000	797000000	713000000	716000000	701000000	714000000	714000000	814000000	773000000		7.71833e+08	7.38667e+08	0.957029
P46223	RL7A_DROME	RpL7A	Large ribosomal subunit protein eL8	702000000	753000000	791000000	737000000	771000000	859000000	731000000	794000000	768000000	789000000	763000000	707000000		7.68833e+08	7.58667e+08	0.986777
Q9VAJ4	OB99A_DROME	Obp99a	General odorant-binding protein 99a	876000000	954000000	744000000	727000000	740000000	571000000	289000000	351000000	289000000	227000000	252000000	316000000		7.68667e+08	2.87333e+08	0.373807
Q9VZI1	Q9VZI1_DROME	Chd64	Transgelin	687000000	761000000	748000000	811000000	761000000	806000000	861000000	835000000	840000000	818000000	874000000	887000000		7.62333e+08	852500000	1.11828
P55828	RS20_DROME	RpS20	Small ribosomal subunit protein uS10	672000000	731000000	685000000	829000000	737000000	910000000	818000000	753000000	809000000	896000000	795000000	802000000		7.60667e+08	8.12167e+08	1.0677
Q24186	RS5A_DROME	RpS5a	Small ribosomal subunit protein uS7A	809000000	681000000	877000000	767000000	756000000	660000000	572000000	744000000	613000000	599000000	677000000	551000000		7.58333e+08	626000000	0.825495
Q9W2H8	Q9W2H8_DROME	Agl	Glycogen debranching enzyme	752000000	789000000	831000000	644000000	654000000	867000000	548000000	574000000	630000000	744000000	562000000	533000000		7.56167e+08	598500000	0.791492
P24156	PHB1_DROME	Phb1	Prohibitin 1	766000000	712000000	732000000	770000000	815000000	731000000	794000000	761000000	783000000	817000000	773000000	793000000		7.54333e+08	7.86833e+08	1.04308
P80455	RS12_DROME	RpS12	Small ribosomal subunit protein eS12	834000000	753000000	796000000	736000000	690000000	710000000	689000000	721000000	640000000	670000000	718000000	596000000		7.53167e+08	6.72333e+08	0.892675
Q9W5N2	RL38_DROME	RpL38	Large ribosomal subunit protein eL38	761000000	688000000	688000000	824000000	802000000	747000000	769000000	826000000	772000000	804000000	805000000	772000000		7.51667e+08	7.91333e+08	1.05277
Q9VEJ0	PRDX3_DROME	Prx3	Thioredoxin-dependent peroxide reductase, mitochondrial	760000000	692000000	748000000	795000000	767000000	738000000	746000000	797000000	754000000	770000000	773000000	791000000		750000000	7.71833e+08	1.02911
Q9VVL7	Q9VVL7_DROME	Dld	Dihydrolipoyl dehydrogenase	787000000	951000000	898000000	592000000	600000000	645000000	870000000	889000000	746000000	714000000	730000000	665000000		745500000	769000000	1.03152
Q04499-3	PROD_DROME	slgA	Isoform B of Proline dehydrogenase 1, mitochondrial	705000000	777000000	752000000	694000000	729000000	797000000	839000000	804000000	833000000	821000000	804000000	812000000		7.42333e+08	8.18833e+08	1.10305
P83967	ACT6_DROME	Act88F	Actin, indirect flight muscle	814000000	942000000	683000000	659000000	603000000	737000000	834000000	735000000	888000000	1100000000	814000000	747000000		7.39667e+08	853000000	1.15322
P46222	RL11_DROME	RpL11	Large ribosomal subunit protein uL5	747000000	672000000	747000000	728000000	760000000	751000000	653000000	788000000	726000000	736000000	812000000	831000000		7.34167e+08	7.57667e+08	1.03201
P49630	RL36_DROME	RpL36	Large ribosomal subunit protein eL36	675000000	782000000	681000000	647000000	688000000	885000000	740000000	686000000	874000000	765000000	680000000	730000000		7.26333e+08	7.45833e+08	1.02685
Q9VLB7	Q9VLB7_DROME	Gdi	Rab GDP dissociation inhibitor	744000000	739000000	722000000	688000000	717000000	735000000	830000000	858000000	866000000	863000000	824000000	819000000		7.24167e+08	8.43333e+08	1.16456
Q9VUY9	PGM_DROME	Pgm1	Phosphoglucomutase	706000000	709000000	799000000	685000000	709000000	713000000	648000000	683000000	658000000	660000000	707000000	629000000		7.20167e+08	6.64167e+08	0.92224
A0A0B4LFW3;Q7K088	A0A0B4LFW3_DROME;Q7K088_DROME	Obp56e	Odorant-binding protein 56e, isoform B	809000000	685000000	753000000	729000000	717000000	628000000	601000000	658000000	699000000	627000000	671000000	782000000		7.20167e+08	673000000	0.934506
Q9VT15	Q9VT15_DROME	Dmel\CG3088	GH14734p	484000000	869000000	829000000	729000000	587000000	819000000	548000000	520000000	633000000	671000000	571000000	641000000		719500000	5.97333e+08	0.830206
Q23997	C5210_DROME	Idgf6	Imaginal disk growth factor 6	775000000	850000000	654000000	615000000	746000000	662000000	589000000	638000000	606000000	573000000	502000000	568000000		717000000	5.79333e+08	0.807996
Q7KVX1;Q9W4H6	Q7KVX1_DROME;Q9W4H6_DROME	Pdha	Pyruvate dehydrogenase E1 component subunit alpha	714000000	746000000	722000000	679000000	706000000	713000000	765000000	749000000	750000000	699000000	708000000	721000000		7.13333e+08	732000000	1.02617
Q9VNW6	Q9VNW6_DROME	P5CS	Delta-1-pyrroline-5-carboxylate synthase	695000000	696000000	853000000	607000000	638000000	776000000	1010000000	1030000000	962000000	1010000000	1020000000	802000000		7.10833e+08	9.72333e+08	1.36788
P41094	RS18_DROME	RpS18	Small ribosomal subunit protein uS13	686000000	687000000	710000000	649000000	739000000	777000000	648000000	687000000	691000000	684000000	688000000	628000000		708000000	671000000	0.94774
Q9VVG5	Q9VVG5_DROME	COX7B	RH19679p	312000000	829000000	1030000000	508000000	943000000	615000000	982000000	992000000	969000000	1010000000	1040000000	932000000		7.06167e+08	987500000	1.3984
Q9VSA3	ACADM_DROME	Mcad	Medium-chain specific acyl-CoA dehydrogenase, mitochondrial	663000000	716000000	746000000	633000000	702000000	743000000	885000000	898000000	868000000	907000000	866000000	803000000		700500000	8.71167e+08	1.24364
Q8I0D4;Q9VFR2	Q8I0D4_DROME;Q9VFR2_DROME	Dmel\CG9297	RE20510p	651000000	750000000	726000000	655000000	670000000	744000000	726000000	699000000	748000000	758000000	679000000	748000000		6.99333e+08	7.26333e+08	1.03861
Q9VPX6	Q9VPX6_DROME	capt	Adenylyl cyclase-associated protein	680000000	718000000	696000000	651000000	717000000	696000000	744000000	655000000	687000000	734000000	658000000	782000000		693000000	710000000	1.02453
P29845	HSP7E_DROME	Hsc70-5	Heat shock 70 kDa protein cognate 5	659000000	699000000	680000000	665000000	677000000	717000000	704000000	634000000	702000000	715000000	673000000	674000000		6.82833e+08	6.83667e+08	1.00122
Q9V4E0	Q9V4E0_DROME	ND-49	Complex I-49kD	634000000	748000000	679000000	617000000	708000000	707000000	749000000	713000000	761000000	801000000	783000000	806000000		6.82167e+08	7.68833e+08	1.12705
P41092	RL27A_DROME	RpL27A	Large ribosomal subunit protein uL15	686000000	676000000	747000000	640000000	627000000	699000000	633000000	719000000	580000000	603000000	631000000	604000000		6.79167e+08	6.28333e+08	0.925153
Q07327	ROP_DROME	Rop	Protein ROP	709000000	690000000	714000000	689000000	661000000	610000000	765000000	710000000	736000000	783000000	794000000	781000000		6.78833e+08	761500000	1.12178
Q9V4E7	Q9V4E7_DROME	Gat	Transporter	615000000	766000000	739000000	708000000	585000000	652000000	864000000	783000000	775000000	795000000	789000000	779000000		677500000	797500000	1.17712
P26686-3;P26686;P26686-2;P26686-5	SRR55_DROME	B52	Serine-arginine protein 55	656000000	679000000	660000000	684000000	670000000	710000000	692000000	644000000	725000000	700000000	708000000	680000000		676500000	691500000	1.02217
Q9VWI0	NDUS4_DROME	ND-18	NADH dehydrogenase [ubiquinone] iron-sulfur protein 4, mitochondrial	609000000	702000000	633000000	616000000	679000000	771000000	751000000	678000000	837000000	722000000	800000000	697000000		6.68333e+08	747500000	1.11845
Q9VWV6	Q9VWV6_DROME	Tsf1	Transferrin	661000000	643000000	548000000	600000000	973000000	569000000	761000000	582000000	494000000	475000000	507000000	632000000		6.65667e+08	5.75167e+08	0.864046
Q7K569	Q7K569_DROME	Gpo1	Glycerol-3-phosphate dehydrogenase	663000000	706000000	682000000	658000000	627000000	654000000	680000000	681000000	708000000	693000000	692000000	693000000		665000000	6.91167e+08	1.03935
A0A0U1RVK6;Q9VIS3;X2JES1	A0A0U1RVK6_DROME;Q9VIS3_DROME;X2JES1_DROME	Fbp	fructose-bisphosphatase	759000000	672000000	695000000	635000000	591000000	632000000	555000000	686000000	641000000	612000000	677000000	574000000		664000000	6.24167e+08	0.94001
P91929	NDUAA_DROME	ND-42	NADH dehydrogenase [ubiquinone] 1 alpha subcomplex subunit 10, mitochondrial	699000000	645000000	687000000	654000000	660000000	628000000	712000000	664000000	672000000	668000000	717000000	727000000		6.62167e+08	6.93333e+08	1.04707
Q9VZS5	RL28_DROME	RpL28	Large ribosomal subunit protein eL28	684000000	640000000	633000000	604000000	632000000	752000000	588000000	591000000	597000000	608000000	629000000	585000000		657500000	5.99667e+08	0.912041
Q9VQD7	Q9VQD7_DROME	ND-B17.2	NADH dehydrogenase [ubiquinone] 1 alpha subcomplex subunit 12	677000000	665000000	671000000	639000000	648000000	634000000	703000000	657000000	708000000	673000000	675000000	726000000		6.55667e+08	6.90333e+08	1.05287
Q9VL70	Q9VL70_DROME	Acaa	HL08109p	660000000	622000000	683000000	634000000	630000000	705000000	678000000	676000000	703000000	759000000	743000000	668000000		6.55667e+08	704500000	1.07448
Q9V9W2;Q9V9W3	Q9V9W2_DROME;Q9V9W3_DROME	RpL6	Large ribosomal subunit protein eL6	663000000	627000000	667000000	657000000	668000000	649000000	565000000	633000000	511000000	521000000	537000000	536000000		6.55167e+08	550500000	0.840244
P48602	VATA1_DROME	Vha68-1	V-type proton ATPase catalytic subunit A isoform 1	645000000	652000000	635000000	695000000	659000000	645000000	729000000	702000000	744000000	745000000	734000000	761000000		6.55167e+08	7.35833e+08	1.12312
Q9W229	Q9W229_DROME	RpS24	40S ribosomal protein S24	669000000	600000000	801000000	772000000	609000000	470000000	631000000	560000000	598000000	619000000	707000000	691000000		653500000	6.34333e+08	0.970671
Q9VS34	RL18_DROME	RpL18	Large ribosomal subunit protein eL18	660000000	586000000	649000000	539000000	702000000	782000000	710000000	732000000	666000000	693000000	733000000	652000000		653000000	6.97667e+08	1.0684
Q9V3A8	Q9V3A8_DROME	ergic53	Ergic53, isoform A	622000000	654000000	658000000	614000000	680000000	678000000	761000000	674000000	724000000	636000000	735000000	677000000		651000000	7.01167e+08	1.07706
Q7JS69	Q7JS69_DROME	nrv3	FI04632p	768000000	558000000	689000000	663000000	649000000	575000000	640000000	671000000	651000000	626000000	593000000	668000000		6.50333e+08	641500000	0.986417
Q9W306	Q9W306_DROME	CT27394	GEO08256p1	716000000	771000000	566000000	616000000	668000000	564000000	607000000	575000000	586000000	583000000	482000000	537000000		6.50167e+08	5.61667e+08	0.863881
P25228	RAB3_DROME	Rab3	Ras-related protein Rab-3	700000000	643000000	632000000	684000000	638000000	601000000	827000000	847000000	736000000	711000000	792000000	827000000		6.49667e+08	790000000	1.21601
P31009	RS2_DROME	RpS2	Small ribosomal subunit protein uS5	635000000	634000000	662000000	591000000	683000000	692000000	568000000	660000000	582000000	642000000	623000000	659000000		649500000	6.22333e+08	0.958173
P14318	MP20_DROME	Mp20	Muscle-specific protein 20	649000000	695000000	588000000	647000000	695000000	623000000	593000000	667000000	636000000	680000000	657000000	726000000		649500000	6.59833e+08	1.01591
Q9VHX4	Q9VHX4_DROME	Dmel\CG2767	LD24679p	723000000	653000000	628000000	667000000	630000000	590000000	599000000	605000000	574000000	610000000	595000000	631000000		648500000	6.02333e+08	0.92881
Q9VTU2	Q9VTU2_DROME	ND-SGDH	NADH dehydrogenase [ubiquinone] 1 beta subcomplex subunit 5, mitochondrial	635000000	640000000	632000000	673000000	652000000	643000000	676000000	680000000	728000000	693000000	718000000	638000000		6.45833e+08	6.88833e+08	1.06658
P21521;P21521-2	SY65_DROME	Syt1	Synaptotagmin 1	624000000	702000000	677000000	605000000	636000000	620000000	813000000	759000000	774000000	742000000	806000000	809000000		644000000	7.83833e+08	1.21713
P07486	G3P1_DROME	Gapdh1	Glyceraldehyde-3-phosphate dehydrogenase 1	686000000	566000000	681000000	685000000	671000000	558000000	520000000	617000000	591000000	502000000	568000000	597000000		6.41167e+08	5.65833e+08	0.882506
Q24117	DYL1_DROME	ctp	Dynein light chain 1, cytoplasmic	556000000	720000000	628000000	613000000	629000000	694000000	674000000	673000000	713000000	661000000	652000000	599000000		640000000	662000000	1.03438
P36188-10;P36188-6	TNNI_DROME	wupA	Isoform 9 of Troponin I	550000000	692000000	592000000	620000000	676000000	689000000	810000000	781000000	730000000	827000000	769000000	740000000		636500000	7.76167e+08	1.21943
Q9W1G0	TALDO_DROME	Taldo	Probable transaldolase	731000000	575000000	655000000	628000000	620000000	594000000	426000000	466000000	438000000	445000000	436000000	410000000		6.33833e+08	4.36833e+08	0.689193
Q8IRD3;Q8IRD4;Q9VZQ8	Q8IRD3_DROME;Q8IRD4_DROME;Q9VZQ8_DROME	Gtpx	Glutathione peroxidase	646000000	616000000	611000000	655000000	634000000	632000000	679000000	747000000	754000000	704000000	750000000	755000000		6.32333e+08	731500000	1.15683
Q7KTJ7	Q7KTJ7_DROME	Bsg	Basigin, isoform G	546000000	693000000	656000000	608000000	636000000	638000000	616000000	648000000	638000000	706000000	714000000	695000000		629500000	669500000	1.06354
R9PY51	R9PY51_DROME	CG4588	Uncharacterized protein	782000000	369000000	649000000	686000000	659000000	623000000	603000000	503000000	696000000	602000000	592000000	585000000		628000000	5.96833e+08	0.950372
Q9VVU2	Q9VVU2_DROME	RpL26	Large ribosomal subunit protein uL24	654000000	587000000	616000000	612000000	642000000	647000000	593000000	563000000	588000000	634000000	593000000	601000000		6.26333e+08	5.95333e+08	0.950506
Q9VNB9	Q9VNB9_DROME	RpL35A	Large ribosomal subunit protein eL33	590000000	569000000	665000000	577000000	681000000	669000000	597000000	572000000	608000000	586000000	606000000	583000000		6.25167e+08	592000000	0.946947
M9PF16	M9PF16_DROME	beta-Spec	Spectrin beta chain	612000000	649000000	630000000	611000000	596000000	649000000	723000000	680000000	752000000	700000000	696000000	705000000		624500000	7.09333e+08	1.13584
Q8T3U2	RS23_DROME	RpS23	Small ribosomal subunit protein uS12	601000000	633000000	628000000	597000000	578000000	667000000	637000000	665000000	597000000	625000000	642000000	674000000		6.17333e+08	640000000	1.03672
Q9VM12	Q9VM12_DROME	Dmel\CG5958	MIP26555p1	727000000	533000000	730000000	577000000	549000000	586000000	572000000	564000000	613000000	646000000	671000000	549000000		617000000	602500000	0.976499
Q9VP61	ACSA_DROME	AcCoAS	Acetyl-coenzyme A synthetase	482000000	631000000	627000000	566000000	632000000	735000000	631000000	617000000	693000000	662000000	643000000	573000000		6.12167e+08	636500000	1.03975
P18935	CYB_DROME	mt:Cyt-b	Cytochrome b	567000000	708000000	625000000	589000000	578000000	604000000	624000000	593000000	588000000	574000000	603000000	668000000		6.11833e+08	6.08333e+08	0.994279
Q0E8X8	Q0E8X8_DROME	BcDNA:RE33866	FI01416p	603000000	676000000	582000000	542000000	587000000	677000000	665000000	610000000	675000000	711000000	606000000	506000000		6.11167e+08	6.28833e+08	1.02891
P19967	CYB5R_DROME	Cyt-b5-r	Cytochrome b5-related protein	522000000	607000000	738000000	511000000	556000000	723000000	590000000	507000000	537000000	599000000	595000000	490000000		609500000	553000000	0.907301
Q9VQ62	NPC2_DROME	Npc2a	NPC intracellular cholesterol transporter 2 homolog a	572000000	627000000	576000000	666000000	579000000	631000000	507000000	518000000	543000000	520000000	546000000	491000000		608500000	5.20833e+08	0.85593
O97418	O97418_DROME	ND-B14.5A	NADH dehydrogenase [ubiquinone] 1 alpha subcomplex subunit 7	613000000	592000000	564000000	639000000	615000000	624000000	579000000	589000000	615000000	568000000	578000000	615000000		6.07833e+08	5.90667e+08	0.971758
Q9VUZ0	Q9VUZ0_DROME	SsRbeta	Translocon-associated protein subunit beta	661000000	501000000	589000000	654000000	650000000	590000000	421000000	509000000	437000000	434000000	563000000	408000000		607500000	462000000	0.760494
P52029	G6PI_DROME	Pgi	Glucose-6-phosphate isomerase	611000000	596000000	683000000	616000000	561000000	550000000	552000000	558000000	573000000	633000000	599000000	547000000		6.02833e+08	577000000	0.957147
Q9VB69	Q9VB69_DROME	Men-b	Malic enzyme	609000000	623000000	601000000	636000000	578000000	561000000	581000000	545000000	590000000	615000000	582000000	577000000		6.01333e+08	5.81667e+08	0.967295
P46461	NSF1_DROME	comt	Vesicle-fusing ATPase 1	624000000	583000000	603000000	599000000	589000000	577000000	601000000	604000000	605000000	621000000	611000000	619000000		5.95833e+08	6.10167e+08	1.02406
Q7K2W6	Q7K2W6_DROME	PPO1	GH04080p	602000000	706000000	562000000	585000000	552000000	567000000	464000000	400000000	382000000	320000000	285000000	342000000		5.95667e+08	365500000	0.613598
Q9W2M4	Q9W2M4_DROME	Dmel\CG10527	Farnesoic acid O-methyl transferase domain-containing protein	512000000	687000000	581000000	540000000	537000000	715000000	702000000	510000000	758000000	714000000	731000000	692000000		5.95333e+08	684500000	1.14978
Q7K3N4	Q7K3N4_DROME	Dmel\CG8888	GH26015p	585000000	616000000	716000000	685000000	494000000	469000000	679000000	678000000	594000000	656000000	609000000	675000000		5.94167e+08	648500000	1.09144
P38979	RSSA_DROME	sta	Small ribosomal subunit protein uS2	582000000	523000000	605000000	625000000	618000000	605000000	508000000	568000000	507000000	533000000	527000000	535000000		593000000	5.29667e+08	0.893198
P29327	RS6_DROME	RpS6	Small ribosomal subunit protein eS6	546000000	547000000	623000000	604000000	589000000	642000000	467000000	504000000	485000000	492000000	473000000	491000000		5.91833e+08	4.85333e+08	0.820051
A8DYI6;A8DYI7;Q0E924	A8DYI6_DROME;A8DYI7_DROME;Q0E924_DROME	Phb2	Prohibitin	565000000	703000000	619000000	606000000	522000000	535000000	725000000	623000000	744000000	798000000	698000000	666000000		5.91667e+08	709000000	1.19831
P13395	SPTCA_DROME	alpha-Spec	Spectrin alpha chain	546000000	613000000	584000000	557000000	602000000	641000000	657000000	633000000	707000000	678000000	671000000	645000000		590500000	6.65167e+08	1.12645
P32100	RL7_DROME	RpL7	Large ribosomal subunit protein uL30	557000000	682000000	668000000	587000000	463000000	574000000	479000000	527000000	498000000	464000000	450000000	466000000		588500000	4.80667e+08	0.816766
Q9VXI1	Q9VXI1_DROME	Had1	L-gulonate 3-dehydrogenase	670000000	546000000	639000000	584000000	544000000	544000000	267000000	286000000	270000000	280000000	278000000	244000000		5.87833e+08	2.70833e+08	0.460731
O97125	HSP68_DROME	Hsp68	Heat shock protein 68	487000000	477000000	715000000	561000000	706000000	547000000	682000000	612000000	639000000	551000000	650000000	560000000		5.82167e+08	6.15667e+08	1.05754
Q9V3N7	Q9V3N7_DROME	CRMP	BcDNA.HL02693	559000000	544000000	566000000	600000000	624000000	590000000	541000000	544000000	562000000	559000000	556000000	596000000		580500000	5.59667e+08	0.964111
Q9VD29	Q9VD29_DROME	Sar1	RE74312p	548000000	540000000	581000000	603000000	606000000	594000000	548000000	559000000	552000000	561000000	549000000	568000000		5.78667e+08	5.56167e+08	0.961118
E1JJE6	E1JJE6_DROME	OtopLa	Otopetrin-like a, isoform C	644000000	524000000	621000000	708000000	441000000	511000000	709000000	661000000	705000000	669000000	697000000	627000000		5.74833e+08	678000000	1.17947
Q8SY61	OB56D_DROME	Obp56d	General odorant-binding protein 56d	665000000	576000000	597000000	563000000	531000000	500000000	453000000	416000000	478000000	484000000	463000000	520000000		572000000	469000000	0.81993
Q8IQQ0	Q8IQQ0_DROME	Ogdh	2-oxoglutarate dehydrogenase, mitochondrial	562000000	562000000	534000000	573000000	595000000	601000000	489000000	552000000	540000000	518000000	511000000	556000000		5.71167e+08	5.27667e+08	0.92384
Q9GU68	IF5A_DROME	eEF5	Eukaryotic translation initiation factor 5A	717000000	487000000	599000000	598000000	551000000	457000000	435000000	506000000	375000000	406000000	446000000	408000000		5.68167e+08	4.29333e+08	0.755647
Q9V8Y2	OB56A_DROME	Obp56a	General odorant-binding protein 56a	665000000	662000000	563000000	513000000	530000000	475000000	368000000	342000000	323000000	359000000	308000000	414000000		568000000	3.52333e+08	0.620305
Q9VZL3	Q9VZL3_DROME	Sc2	very-long-chain enoyl-CoA reductase	481000000	553000000	586000000	561000000	588000000	636000000	699000000	660000000	709000000	723000000	649000000	647000000		567500000	6.81167e+08	1.20029
P13677	KPC2_DROME	inaC	Protein kinase C, eye isozyme	636000000	565000000	559000000	572000000	536000000	534000000	524000000	575000000	523000000	534000000	551000000	585000000		567000000	5.48667e+08	0.967666
Q9VM18	Q9VM18_DROME	21430192	Trehalose 6-phosphate phosphatase	539000000	643000000	585000000	535000000	564000000	530000000	566000000	555000000	553000000	547000000	525000000	558000000		566000000	5.50667e+08	0.972909
Q9V3W2	Q9V3W2_DROME	ND-B17	GM23292p	610000000	528000000	639000000	592000000	528000000	495000000	476000000	520000000	425000000	449000000	481000000	460000000		5.65333e+08	468500000	0.828715
Q9W1H8	Q9W1H8_DROME	Mtpbeta	acetyl-CoA C-acyltransferase	547000000	525000000	606000000	576000000	559000000	561000000	647000000	632000000	616000000	617000000	629000000	596000000		5.62333e+08	6.22833e+08	1.10759
P13217	PIPA_DROME	norpA	1-phosphatidylinositol 4,5-bisphosphate phosphodiesterase	579000000	536000000	545000000	554000000	586000000	562000000	548000000	577000000	563000000	554000000	573000000	591000000		5.60333e+08	5.67667e+08	1.01309
Q7KLX3	Q7KLX3_DROME	Tapdelta	Translocon-associated protein subunit delta	526000000	537000000	557000000	547000000	576000000	619000000	534000000	625000000	556000000	587000000	620000000	524000000		5.60333e+08	5.74333e+08	1.02499
Q9VA32	Q9VA32_DROME	Cpr100A	Cuticular protein 100A	596000000	527000000	527000000	517000000	629000000	564000000	662000000	608000000	643000000	700000000	581000000	675000000		560000000	6.44833e+08	1.15149
Q9W0A8	Q9W0A8_DROME	RpL23A	FI01658p	502000000	563000000	641000000	536000000	539000000	576000000	553000000	544000000	523000000	435000000	529000000	528000000		559500000	5.18667e+08	0.927018
O76927;O76927-2	RS21_DROME	RpS21	Small ribosomal subunit protein eS21	615000000	552000000	534000000	553000000	493000000	603000000	533000000	571000000	537000000	581000000	581000000	532000000		5.58333e+08	5.55833e+08	0.995522
Q9W125	Q9W125_DROME	ND-19	NADH dehydrogenase [ubiquinone] 1 alpha subcomplex subunit 8	619000000	571000000	538000000	534000000	542000000	544000000	579000000	548000000	525000000	571000000	564000000	559000000		558000000	5.57667e+08	0.999403
O18335	O18335_DROME	Rab11	Rab11	500000000	592000000	543000000	567000000	591000000	528000000	637000000	601000000	614000000	612000000	615000000	606000000		553500000	6.14167e+08	1.10961
P02255	H1_DROME	His1	Histone H1	569000000	642000000	574000000	489000000	518000000	527000000	662000000	636000000	685000000	616000000	616000000	644000000		5.53167e+08	6.43167e+08	1.1627
P02572	ACT2_DROME	Act42A	Actin-42A	472000000	744000000	444000000	378000000	526000000	743000000	761000000	552000000	692000000	833000000	624000000	647000000		5.51167e+08	6.84833e+08	1.24252
P22465	ANX10_DROME	AnxB10	Annexin B10	563000000	539000000	550000000	561000000	560000000	521000000	559000000	596000000	590000000	595000000	577000000	602000000		549000000	586500000	1.06831
P21914	SDHB_DROME	SdhB	Succinate dehydrogenase [ubiquinone] iron-sulfur subunit, mitochondrial	497000000	574000000	552000000	535000000	531000000	603000000	560000000	541000000	588000000	560000000	555000000	603000000		5.48667e+08	5.67833e+08	1.03493
Q7KM15	Q7KM15_DROME	bic	Transcription factor BTF3	560000000	548000000	546000000	528000000	538000000	566000000	544000000	530000000	557000000	589000000	533000000	524000000		5.47667e+08	5.46167e+08	0.997261
P04359-2;P04359	RL32_DROME	RpL32	Large ribosomal subunit protein eL32	668000000	462000000	606000000	473000000	559000000	511000000	452000000	527000000	393000000	391000000	487000000	365000000		546500000	4.35833e+08	0.797499
Q9V3L7	Q9V3L7_DROME	NP15.6	NADH dehydrogenase [ubiquinone] 1 beta subcomplex subunit 11, mitochondrial	503000000	521000000	559000000	550000000	544000000	559000000	634000000	603000000	656000000	654000000	636000000	634000000		5.39333e+08	6.36167e+08	1.17954
P52034-2;P52034	PFKA_DROME	Pfk	ATP-dependent 6-phosphofructokinase	511000000	542000000	544000000	523000000	544000000	559000000	510000000	560000000	562000000	514000000	548000000	526000000		5.37167e+08	5.36667e+08	0.999069
Q9VPE2	Q9VPE2_DROME	ND-39	NADH dehydrogenase [ubiquinone] 1 alpha subcomplex subunit 9, mitochondrial	535000000	582000000	606000000	543000000	483000000	456000000	596000000	511000000	572000000	578000000	554000000	604000000		5.34167e+08	5.69167e+08	1.06552
Q9VBI2	Q9VBI2_DROME	Cmpk	UMP-CMP kinase	520000000	522000000	520000000	534000000	548000000	551000000	576000000	554000000	602000000	571000000	561000000	566000000		532500000	5.71667e+08	1.07355
A1ZBJ2	A1ZBJ2_DROME	Acadvl	Very long-chain specific acyl-CoA dehydrogenase, mitochondrial	497000000	503000000	578000000	558000000	538000000	517000000	607000000	601000000	580000000	609000000	612000000	577000000		5.31833e+08	5.97667e+08	1.12379
P29746	BNB_DROME	bnb	Protein bangles and beads	540000000	567000000	500000000	548000000	510000000	513000000	512000000	502000000	503000000	536000000	554000000	569000000		5.29667e+08	5.29333e+08	0.999371
O17445	RL15_DROME	RpL15	Large ribosomal subunit protein eL15	416000000	456000000	521000000	481000000	566000000	738000000	687000000	579000000	874000000	849000000	680000000	728000000		5.29667e+08	7.32833e+08	1.38357
Q7KN85	Q7KN85_DROME	Acly	ATP-citrate synthase	551000000	480000000	521000000	597000000	524000000	501000000	429000000	468000000	414000000	435000000	409000000	393000000		529000000	4.24667e+08	0.802773
A1ZAH8;Q7JZW2	A1ZAH8_DROME;Q7JZW2_DROME	RpS15	Small ribosomal subunit protein uS19	458000000	699000000	524000000	609000000	553000000	325000000	339000000	466000000	490000000	484000000	634000000	268000000		528000000	4.46833e+08	0.846275
Q9VC18	Q9VC18_DROME	BEST:GH11240	Bifunctional purine biosynthesis protein ATIC	563000000	559000000	567000000	453000000	506000000	498000000	358000000	405000000	382000000	390000000	411000000	351000000		5.24333e+08	3.82833e+08	0.730134
M9MRX0	M9MRX0_DROME	Lmpt	Limpet, isoform J	590000000	518000000	560000000	537000000	486000000	435000000	457000000	466000000	381000000	408000000	439000000	430000000		521000000	4.30167e+08	0.825656
Q7KN62	TERA_DROME	TER94	Transitional endoplasmic reticulum ATPase TER94	526000000	485000000	517000000	506000000	545000000	536000000	491000000	510000000	498000000	511000000	522000000	489000000		5.19167e+08	503500000	0.969823
Q6IDF5	Q6IDF5_DROME	ND-B15	NADH dehydrogenase [ubiquinone] 1 beta subcomplex subunit 4	506000000	506000000	562000000	427000000	511000000	586000000	404000000	457000000	432000000	608000000	402000000	588000000		5.16333e+08	4.81833e+08	0.933183
P56079	CDS_DROME	Cds	Phosphatidate cytidylyltransferase, photoreceptor-specific	440000000	605000000	570000000	468000000	452000000	542000000	683000000	585000000	693000000	670000000	698000000	565000000		5.12833e+08	649000000	1.26552
Q8SY19	Q8SY19_DROME	Mgstl	glutathione transferase	460000000	555000000	584000000	547000000	432000000	494000000	651000000	570000000	512000000	528000000	573000000	476000000		512000000	5.51667e+08	1.07747
Q9VZU4	NDUS3_DROME	ND-30	NADH dehydrogenase [ubiquinone] iron-sulfur protein 3, mitochondrial	528000000	514000000	534000000	493000000	478000000	517000000	572000000	499000000	515000000	561000000	545000000	551000000		5.10667e+08	540500000	1.05842
Q24008	INAD_DROME	inaD	Inactivation-no-after-potential D protein	506000000	536000000	515000000	505000000	488000000	503000000	533000000	556000000	546000000	553000000	579000000	525000000		5.08833e+08	5.48667e+08	1.07828
P13607-5	ATNA_DROME	Atpalpha	Isoform 5 of Sodium/potassium-transporting ATPase subunit alpha	457000000	497000000	559000000	490000000	532000000	503000000	523000000	595000000	650000000	514000000	589000000	522000000		5.06333e+08	565500000	1.11685
Q8SZK9	Q8SZK9_DROME	slf	HL04814p	483000000	487000000	482000000	528000000	522000000	534000000	482000000	487000000	499000000	489000000	527000000	515000000		506000000	4.99833e+08	0.987813
P19334	TRP_DROME	trp	Transient receptor potential protein	493000000	503000000	547000000	515000000	472000000	489000000	524000000	555000000	555000000	524000000	535000000	533000000		5.03167e+08	5.37667e+08	1.06857
Q00168-3	KCC2A_DROME	CaMKII	Isoform 3 of Calcium/calmodulin-dependent protein kinase type II alpha chain	538000000	513000000	488000000	478000000	517000000	483000000	426000000	442000000	460000000	427000000	422000000	457000000		5.02833e+08	439000000	0.873053
Q9W370	Q9W370_DROME	Dmel\CG15369	GEO12084p1	541000000	548000000	406000000	467000000	590000000	463000000	255000000	316000000	318000000	311000000	250000000	267000000		502500000	2.86167e+08	0.569486
Q9NFZ3	GBGE_DROME	Ggamma30A	Guanine nucleotide-binding protein subunit gamma-e	458000000	600000000	442000000	484000000	523000000	501000000	561000000	594000000	598000000	612000000	638000000	567000000		5.01333e+08	595000000	1.18684
Q9VH69	RS29_DROME	RpS29	Small ribosomal subunit protein uS14	456000000	544000000	563000000	463000000	471000000	508000000	526000000	468000000	420000000	517000000	495000000	446000000		5.00833e+08	4.78667e+08	0.95574
P41572	6PGD_DROME	Pgd	6-phosphogluconate dehydrogenase, decarboxylating	429000000	541000000	517000000	589000000	463000000	464000000	480000000	424000000	369000000	397000000	480000000	406000000		500500000	426000000	0.851149
Q9VEY5	Q9VEY5_DROME	Mic26-27	MICOS complex subunit	435000000	506000000	500000000	514000000	472000000	534000000	546000000	513000000	561000000	519000000	570000000	506000000		493500000	5.35833e+08	1.08578
Q9VQR2	Q9VQR2_DROME	ND-PDSW	NADH dehydrogenase [ubiquinone] 1 beta subcomplex subunit 10	575000000	457000000	461000000	460000000	533000000	468000000	444000000	440000000	439000000	449000000	429000000	520000000		4.92333e+08	453500000	0.921124
Q9W3X7	Q9W3X7_DROME	ND-ASHI	NADH dehydrogenase [ubiquinone] 1 beta subcomplex subunit 8, mitochondrial	486000000	517000000	489000000	470000000	454000000	525000000	622000000	511000000	604000000	539000000	554000000	589000000		4.90167e+08	5.69833e+08	1.16253
A0A0B4LGD3	A0A0B4LGD3_DROME	kcc	Kazachoc, isoform G	510000000	508000000	494000000	490000000	438000000	500000000	620000000	636000000	611000000	601000000	609000000	540000000		490000000	6.02833e+08	1.23027
Q6NP72	Q6NP72_DROME	Dmel\CG13220	GEO09659p1	543000000	453000000	484000000	493000000	488000000	468000000	438000000	404000000	421000000	391000000	452000000	447000000		4.88167e+08	425500000	0.871629
Q7KV27;Q9VYD9	Q7KV27_DROME;Q9VYD9_DROME	Alat	alanine transaminase	484000000	498000000	466000000	504000000	491000000	476000000	507000000	474000000	457000000	518000000	488000000	496000000		486500000	490000000	1.00719
Q9VV43	TPPP_DROME	ringer	Tubulin polymerization-promoting protein homolog	521000000	499000000	461000000	481000000	483000000	474000000	508000000	492000000	482000000	482000000	471000000	513000000		486500000	4.91333e+08	1.00993
P81900	KAPR2_DROME	Pka-R2	cAMP-dependent protein kinase type II regulatory subunit	489000000	479000000	475000000	523000000	509000000	442000000	514000000	511000000	502000000	513000000	520000000	534000000		4.86167e+08	5.15667e+08	1.06068
A8Y535	A8Y535_DROME	UQCR-11	Cytochrome b-c1 complex subunit 6	565000000	367000000	513000000	394000000	539000000	527000000	569000000	593000000	543000000	582000000	540000000	484000000		4.84167e+08	5.51833e+08	1.13976
A1Z893	A1Z893_DROME	Dmel\CG12896	DI01187p	419000000	502000000	500000000	458000000	505000000	519000000	415000000	422000000	402000000	462000000	448000000	432000000		4.83833e+08	4.30167e+08	0.88908
P47947	TNNC1_DROME	TpnC41C	Troponin C, isoform 1	519000000	540000000	462000000	474000000	469000000	433000000	567000000	493000000	468000000	531000000	546000000	563000000		4.82833e+08	528000000	1.09355
Q7KT11;Q8SZU0;Q9VIJ0	Q7KT11_DROME;Q8SZU0_DROME;Q9VIJ0_DROME	Dmel\CG9331	Uncharacterized protein, isoform B	527000000	444000000	493000000	466000000	462000000	465000000	360000000	385000000	364000000	393000000	388000000	330000000		4.76167e+08	370000000	0.777039
P50887	RL22_DROME	RpL22	Large ribosomal subunit protein eL22	443000000	461000000	478000000	491000000	485000000	493000000	444000000	446000000	423000000	424000000	421000000	465000000		4.75167e+08	4.37167e+08	0.920028
Q9U4G1	BDL_DROME	bdl	Protein borderless	463000000	456000000	484000000	495000000	478000000	469000000	477000000	484000000	491000000	464000000	490000000	488000000		4.74167e+08	4.82333e+08	1.01722
Q9VL16	Q9VL16_DROME	Fundc1	RE45833p	476000000	473000000	466000000	474000000	476000000	479000000	559000000	538000000	576000000	544000000	539000000	575000000		474000000	5.55167e+08	1.17124
Q9VGS3	Q9VGS3_DROME	SdhC	RH44771p	373000000	557000000	499000000	431000000	385000000	584000000	598000000	482000000	563000000	661000000	568000000	545000000		471500000	569500000	1.20785
Q9VHS2	COX7A_DROME	COX7A	Cytochrome c oxidase subunit 7A, mitochondrial	448000000	534000000	488000000	465000000	449000000	435000000	453000000	360000000	450000000	460000000	462000000	468000000		4.69833e+08	4.42167e+08	0.941114
Q9VVA7	Q9VVA7_DROME	TSG101	Tumor suppressor protein 101	481000000	429000000	465000000	481000000	474000000	484000000	479000000	476000000	488000000	496000000	473000000	494000000		469000000	4.84333e+08	1.03269
P08171	EST6_DROME	Est-6	Esterase-6	461000000	501000000	479000000	474000000	439000000	448000000	334000000	358000000	348000000	338000000	322000000	341000000		467000000	3.40167e+08	0.728408
Q9VWY5	Q9VWY5_DROME	Dmel\CG7135	CHK kinase-like domain-containing protein	453000000	490000000	531000000	500000000	424000000	403000000	659000000	527000000	610000000	581000000	607000000	619000000		4.66833e+08	600500000	1.28633
Q9VGZ3	Q9VGZ3_DROME	Irp-1B	Iron regulatory protein 1B	465000000	447000000	450000000	486000000	461000000	475000000	366000000	417000000	392000000	367000000	397000000	396000000		464000000	3.89167e+08	0.838721
P38040	GBG1_DROME	Ggamma1	Guanine nucleotide-binding protein subunit gamma-1	496000000	429000000	426000000	574000000	474000000	380000000	547000000	562000000	634000000	481000000	576000000	601000000		4.63167e+08	5.66833e+08	1.22382
Q7K485	Q7K485_DROME	cathD	Cathepsin D	440000000	459000000	413000000	428000000	524000000	509000000	357000000	396000000	371000000	367000000	371000000	355000000		4.62167e+08	369500000	0.799495
P36179	2AAA_DROME	Pp2A-29B	Serine/threonine-protein phosphatase PP2A 65 kDa regulatory subunit	439000000	485000000	458000000	442000000	459000000	489000000	533000000	487000000	531000000	547000000	520000000	509000000		462000000	5.21167e+08	1.12807
P42281	ACBP_DROME	Acbp2	Acyl-CoA-binding protein homolog	503000000	412000000	494000000	555000000	430000000	373000000	379000000	374000000	406000000	427000000	375000000	371000000		4.61167e+08	3.88667e+08	0.84279
M9NFH8	M9NFH8_DROME	GS	glutamate synthase (NADH)	427000000	448000000	458000000	445000000	487000000	477000000	500000000	534000000	531000000	533000000	538000000	525000000		457000000	5.26833e+08	1.15281
Q9VY05	Q9VY05_DROME	Dmel\CG9512	GH11762p	392000000	507000000	475000000	420000000	425000000	516000000	501000000	388000000	424000000	413000000	464000000	445000000		4.55833e+08	4.39167e+08	0.963437
P48148	RHO1_DROME	Rho1	Ras-like GTP-binding protein Rho1	467000000	495000000	431000000	500000000	425000000	413000000	566000000	541000000	525000000	557000000	561000000	551000000		4.55167e+08	5.50167e+08	1.20871
Q9VNE9	RL13A_DROME	RpL13A	Large ribosomal subunit protein uL13	412000000	481000000	466000000	407000000	453000000	479000000	424000000	442000000	452000000	388000000	365000000	397000000		4.49667e+08	4.11333e+08	0.914752
Q9VD30	Q9VD30_DROME	rdhB	GH05294p	494000000	456000000	449000000	520000000	387000000	367000000	374000000	399000000	322000000	354000000	377000000	389000000		445500000	3.69167e+08	0.828657
Q9I7J0	Q9I7J0_DROME	Dmel\CG5023	GH21596p	437000000	429000000	433000000	436000000	502000000	430000000	469000000	451000000	513000000	476000000	484000000	492000000		444500000	4.80833e+08	1.08174
Q94533	Q94533_DROME	S6k	Ribosomal protein S6 kinase	477000000	393000000	480000000	460000000	425000000	419000000	388000000	396000000	378000000	417000000	327000000	373000000		4.42333e+08	3.79833e+08	0.858704
Q27415;Q27415-2	NLP_DROME	Nlp	Nucleoplasmin-like protein	452000000	407000000	449000000	475000000	454000000	413000000	377000000	441000000	400000000	421000000	383000000	428000000		4.41667e+08	4.08333e+08	0.924528
Q9VAY2	Q9VAY2_DROME	Gp93	Heat shock protein 83	442000000	436000000	420000000	424000000	418000000	450000000	433000000	411000000	448000000	429000000	445000000	422000000		4.31667e+08	4.31333e+08	0.999228
Q7JXC4	Q7JXC4_DROME	P32	CG6459 protein	422000000	442000000	439000000	417000000	460000000	406000000	497000000	407000000	518000000	482000000	455000000	472000000		431000000	4.71833e+08	1.09474
P08645	RAP1_DROME	Rap1	Ras-related protein Rap1	430000000	433000000	432000000	456000000	418000000	416000000	423000000	461000000	442000000	442000000	442000000	430000000		4.30833e+08	440000000	1.02128
P12370	KAPC1_DROME	Pka-C1	cAMP-dependent protein kinase catalytic subunit 1	429000000	436000000	447000000	398000000	423000000	442000000	447000000	439000000	456000000	445000000	455000000	414000000		4.29167e+08	4.42667e+08	1.03146
P36188-9	TNNI_DROME	wupA	Isoform 8 of Troponin I	469000000	438000000	385000000	441000000	450000000	386000000	415000000	387000000	367000000	386000000	374000000	405000000		4.28167e+08	389000000	0.908525
P29742	CLH_DROME	Chc	Clathrin heavy chain	408000000	439000000	436000000	440000000	413000000	433000000	445000000	427000000	442000000	435000000	429000000	425000000		4.28167e+08	4.33833e+08	1.01323
Q9W499	Q9W499_DROME	RpL35	60S ribosomal protein L35	393000000	378000000	444000000	434000000	402000000	512000000	349000000	342000000	377000000	341000000	370000000	335000000		4.27167e+08	3.52333e+08	0.824815
Q9XZ10	Q9XZ10_DROME	Vha100-1	V-type proton ATPase subunit a	430000000	430000000	421000000	440000000	434000000	408000000	452000000	470000000	487000000	480000000	496000000	484000000		4.27167e+08	4.78167e+08	1.11939
Q9VL18	EF1D_DROME	eEF1delta	Probable elongation factor 1-delta	417000000	395000000	447000000	417000000	423000000	459000000	385000000	397000000	369000000	389000000	396000000	375000000		4.26333e+08	3.85167e+08	0.90344
Q9VXC9	Q9VXC9_DROME	SP99	RH40504p	349000000	494000000	449000000	446000000	337000000	478000000	331000000	278000000	413000000	431000000	322000000	369000000		425500000	3.57333e+08	0.839796
Q9VKQ2	Q9VKQ2_DROME	Dmel\CG17127	Uncharacterized protein, isoform A	422000000	340000000	455000000	431000000	529000000	367000000	373000000	349000000	413000000	387000000	325000000	380000000		424000000	3.71167e+08	0.875393
P40792	RAC1_DROME	Rac1	Ras-related protein Rac1	489000000	430000000	461000000	418000000	408000000	333000000	440000000	502000000	424000000	424000000	479000000	459000000		4.23167e+08	4.54667e+08	1.07444
A1Z784	A1Z784_DROME	ACC	Acetyl-CoA carboxylase, isoform A	408000000	380000000	499000000	401000000	402000000	446000000	326000000	330000000	317000000	345000000	340000000	289000000		4.22667e+08	324500000	0.767744
Q9VZ24	Q9VZ24_DROME	Dmel\CG15201	GEO11412p1	477000000	360000000	423000000	424000000	489000000	355000000	353000000	412000000	367000000	376000000	381000000	366000000		4.21333e+08	3.75833e+08	0.892009
A1Z9E3	A1Z9E3_DROME	mEFTu1	Elongation factor Tu	457000000	453000000	435000000	426000000	387000000	370000000	476000000	459000000	489000000	460000000	495000000	459000000		4.21333e+08	473000000	1.12263
Q09103-3	DGK2_DROME	rdgA	Isoform B of Eye-specific diacylglycerol kinase	402000000	429000000	416000000	395000000	425000000	451000000	460000000	437000000	483000000	450000000	455000000	440000000		4.19667e+08	4.54167e+08	1.08221
M9MSL3	M9MSL3_DROME	Hsp110	Hsc70Cb, isoform G	392000000	410000000	398000000	418000000	429000000	436000000	389000000	402000000	403000000	405000000	398000000	403000000		4.13833e+08	400000000	0.966573
Q7K221;A1ZAA5	A1ZAA5_DROME;Q7K221_DROME	Got1	aspartate transaminase	388000000	447000000	446000000	413000000	390000000	397000000	428000000	353000000	407000000	401000000	401000000	396000000		413500000	3.97667e+08	0.961709
Q9VMI3	Q9VMI3_DROME	ND-51	NADH dehydrogenase [ubiquinone] flavoprotein 1, mitochondrial	366000000	441000000	449000000	373000000	417000000	435000000	438000000	436000000	421000000	418000000	422000000	437000000		413500000	4.28667e+08	1.03668
Q9V7N5-2	VATC_DROME	Vha44	Isoform A of V-type proton ATPase subunit C	402000000	428000000	450000000	425000000	372000000	403000000	442000000	454000000	404000000	401000000	423000000	418000000		4.13333e+08	4.23667e+08	1.025
Q8IQH0	Q8IQH0_DROME	Nrx-IV	FI12817p	416000000	393000000	385000000	430000000	449000000	406000000	393000000	412000000	389000000	407000000	402000000	403000000		4.13167e+08	401000000	0.970553
Q9VN21	Q9VN21_DROME	lost	LD30155p	423000000	404000000	433000000	406000000	405000000	408000000	471000000	452000000	448000000	472000000	469000000	453000000		4.13167e+08	4.60833e+08	1.11537
Q9VMU0	Q9VMU0_DROME	ND-13A	NADH dehydrogenase [ubiquinone] iron-sulfur protein 6, mitochondrial	313000000	427000000	440000000	335000000	405000000	535000000	538000000	447000000	554000000	546000000	575000000	477000000		4.09167e+08	5.22833e+08	1.2778
C0PDF4;M9PEW1;Q9I7R0	C0PDF4_DROME;M9PEW1_DROME;Q9I7R0_DROME	Apt1	palmitoyl-protein hydrolase	393000000	395000000	393000000	422000000	422000000	428000000	456000000	433000000	484000000	477000000	468000000	464000000		4.08833e+08	4.63667e+08	1.13412
P18489;P18489-2;P18489-3;P18489-4	SYB_DROME	Syb	Synaptobrevin	490000000	347000000	417000000	484000000	365000000	344000000	288000000	355000000	307000000	304000000	268000000	315000000		4.07833e+08	3.06167e+08	0.750715
O01367;O01367-2;O01367-3	HOW_DROME	how	Protein held out wings	423000000	370000000	376000000	469000000	428000000	374000000	350000000	376000000	409000000	446000000	414000000	442000000		4.06667e+08	4.06167e+08	0.99877
Q9V3Z4	Q9V3Z4_DROME	Rpn5	GH11341p	423000000	411000000	414000000	423000000	408000000	356000000	392000000	401000000	380000000	388000000	371000000	359000000		4.05833e+08	3.81833e+08	0.940862
Q9VLS4	Q9VLS4_DROME	Acbp1	Acyl-CoA binding protein 1, isoform A	422000000	397000000	404000000	376000000	429000000	403000000	403000000	422000000	406000000	418000000	420000000	439000000		4.05167e+08	418000000	1.03167
Q8SZN1	Q8SZN1_DROME	Dmel\CG31313	GEO08217p1	474000000	452000000	327000000	322000000	433000000	418000000	268000000	310000000	249000000	241000000	241000000	259000000		4.04333e+08	2.61333e+08	0.646331
Q9I7Q5	Q9I7Q5_DROME	Cpr65Au	Cuticular protein 65Au, isoform A	454000000	424000000	354000000	381000000	382000000	427000000	344000000	348000000	371000000	391000000	331000000	376000000		4.03667e+08	3.60167e+08	0.892238
Q9VF15	Q9VF15_DROME	glob1	GEO09476p1	342000000	476000000	418000000	414000000	386000000	376000000	443000000	407000000	418000000	445000000	431000000	420000000		402000000	4.27333e+08	1.06302
Q9VBP6	Q9VBP6_DROME	Ssadh	Succinate-semialdehyde dehydrogenase	341000000	389000000	437000000	415000000	422000000	402000000	431000000	438000000	443000000	416000000	442000000	452000000		401000000	437000000	1.08978
Q9VU68	WDR1_DROME	flr	Actin-interacting protein 1	385000000	384000000	381000000	412000000	426000000	395000000	366000000	367000000	385000000	391000000	394000000	415000000		3.97167e+08	3.86333e+08	0.972723
Q9VSU6	Q9VSU6_DROME	Dhpr	Dihydropteridine reductase	399000000	410000000	405000000	356000000	391000000	419000000	388000000	393000000	414000000	400000000	408000000	366000000		3.96667e+08	3.94833e+08	0.995378
Q8T0L3	Q8T0L3_DROME	Uba1	E1 ubiquitin-activating enzyme	405000000	410000000	370000000	394000000	386000000	413000000	389000000	378000000	406000000	383000000	387000000	386000000		3.96333e+08	3.88167e+08	0.979394
P41043	GSTS1_DROME	GstS1	Glutathione S-transferase S1	408000000	400000000	381000000	421000000	397000000	369000000	466000000	425000000	409000000	470000000	428000000	467000000		396000000	4.44167e+08	1.12163
A1ZB61	A1ZB61_DROME	BomBc2	Bomanin bicipital 2, isoform A	454000000	374000000	317000000	403000000	478000000	333000000	445000000	413000000	298000000	345000000	304000000	363000000		3.93167e+08	3.61333e+08	0.919033
P46415	ADHX_DROME	Fdh	Alcohol dehydrogenase class-3	421000000	381000000	394000000	379000000	384000000	383000000	335000000	359000000	350000000	359000000	361000000	345000000		3.90333e+08	351500000	0.900512
Q6NLA3;Q8IML3;Q8IML4	Q6NLA3_DROME;Q8IML3_DROME;Q8IML4_DROME	Vha100-1	V-type proton ATPase subunit a	385000000	325000000	397000000	391000000	460000000	380000000	327000000	391000000	449000000	366000000	404000000	458000000		3.89667e+08	3.99167e+08	1.02438
Q8MLY8	RS8_DROME	RpS8	Small ribosomal subunit protein eS8	357000000	362000000	427000000	358000000	394000000	437000000	405000000	373000000	339000000	331000000	336000000	346000000		3.89167e+08	355000000	0.912206
Q9W457;B7Z0X1	B7Z0X1_DROME;Q9W457_DROME	Shmt	Serine hydroxymethyltransferase	414000000	361000000	401000000	383000000	379000000	396000000	375000000	393000000	394000000	385000000	408000000	335000000		389000000	3.81667e+08	0.981148
A1Z7Z4	A1Z7Z4_DROME	Dmel\CG1648	Uncharacterized protein, isoform B	391000000	347000000	393000000	408000000	423000000	370000000	442000000	520000000	467000000	525000000	385000000	469000000		3.88667e+08	468000000	1.20412
Q9VJ19	Q9VJ19_DROME	RpL30	Large ribosomal subunit protein eL30	396000000	341000000	381000000	415000000	351000000	435000000	281000000	321000000	264000000	290000000	297000000	263000000		386500000	286000000	0.739974
Q8IQG9	Q8IQG9_DROME	Ak1	Adenylate kinase 1, isoform B	396000000	392000000	367000000	365000000	396000000	391000000	352000000	339000000	340000000	309000000	317000000	345000000		384500000	3.33667e+08	0.867794
Q9W402	Q9W402_DROME	ND-B16.6	NADH dehydrogenase [ubiquinone] 1 alpha subcomplex subunit 13	284000000	471000000	386000000	277000000	374000000	514000000	482000000	466000000	503000000	502000000	488000000	458000000		3.84333e+08	4.83167e+08	1.25716
Q9VZ23	RAN_DROME	Ran	GTP-binding nuclear protein Ran	431000000	365000000	426000000	379000000	358000000	344000000	384000000	361000000	397000000	391000000	372000000	340000000		3.83833e+08	3.74167e+08	0.974815
Q9V7D2	VATD1_DROME	Vha36-1	V-type proton ATPase subunit D 1	352000000	361000000	371000000	387000000	412000000	418000000	386000000	374000000	428000000	382000000	408000000	417000000		383500000	3.99167e+08	1.04085
Q7JZK1	Q7JZK1_DROME	ND-B14	NADH dehydrogenase [ubiquinone] 1 alpha subcomplex subunit 6	371000000	419000000	369000000	349000000	404000000	382000000	377000000	399000000	347000000	343000000	367000000	307000000		3.82333e+08	3.56667e+08	0.932868
E6EK18	E6EK18_DROME	PMCA	Calcium-transporting ATPase	397000000	382000000	398000000	394000000	361000000	362000000	396000000	381000000	361000000	374000000	385000000	393000000		3.82333e+08	3.81667e+08	0.998256
O16797	RL3_DROME	RpL3	Large ribosomal subunit protein uL3	416000000	376000000	387000000	373000000	366000000	363000000	372000000	368000000	360000000	353000000	367000000	334000000		3.80167e+08	359000000	0.944323
Q9W3K9	Q9W3K9_DROME	Ldsdh1	NADP-retinol dehydrogenase	357000000	352000000	410000000	393000000	388000000	375000000	406000000	398000000	410000000	365000000	410000000	418000000		3.79167e+08	4.01167e+08	1.05802
Q7KSQ0	Q7KSQ0_DROME	sea	Citrate transport protein	405000000	364000000	409000000	392000000	342000000	359000000	354000000	377000000	331000000	345000000	346000000	351000000		378500000	3.50667e+08	0.926464
Q9Y1A3	TIM8_DROME	Tim8	Mitochondrial import inner membrane translocase subunit Tim8	388000000	333000000	348000000	386000000	425000000	386000000	357000000	369000000	357000000	354000000	371000000	350000000		3.77667e+08	3.59667e+08	0.952339
A0A1F4	EYS_DROME	eys	Protein eyes shut	383000000	384000000	384000000	364000000	377000000	373000000	378000000	365000000	371000000	392000000	376000000	377000000		377500000	376500000	0.997351
Q9VLP2	Q9VLP2_DROME	Dmel\CG7781	GEO08076p1	447000000	342000000	390000000	410000000	373000000	292000000	350000000	329000000	279000000	323000000	328000000	346000000		3.75667e+08	3.25833e+08	0.867347
P46150-4;P46150-3;P46150;P46150-2	MOEH_DROME	Moe	Moesin/ezrin/radixin homolog 1	322000000	402000000	377000000	357000000	379000000	411000000	436000000	376000000	424000000	444000000	418000000	395000000		3.74667e+08	415500000	1.10899
P15357	RS27A_DROME	RpS27A	Ubiquitin-ribosomal protein eS31 fusion protein	360000000	380000000	382000000	408000000	404000000	311000000	348000000	352000000	308000000	325000000	317000000	335000000		3.74167e+08	3.30833e+08	0.884187
Q0KHZ9	Q0KHZ9_DROME	Cnx99A	Calnexin 99A, isoform E	362000000	396000000	368000000	351000000	378000000	390000000	406000000	422000000	442000000	427000000	400000000	414000000		3.74167e+08	418500000	1.11849
Q9U1L2	Q9U1L2_DROME	EG:BACR7A4.14	EG:BACR7A4.14 protein	427000000	324000000	361000000	392000000	392000000	348000000	169000000	257000000	183000000	175000000	161000000	172000000		374000000	1.86167e+08	0.497772
Q9VHF9	Q9VHF9_DROME	Dmel\CG8861	Uncharacterized protein, isoform B	415000000	341000000	396000000	374000000	377000000	332000000	353000000	355000000	384000000	357000000	383000000	394000000		372500000	371000000	0.995973
P17704	RS17_DROME	RpS17	Small ribosomal subunit protein eS17	398000000	362000000	381000000	319000000	338000000	435000000	410000000	400000000	407000000	441000000	406000000	368000000		3.72167e+08	4.05333e+08	1.08912
P41073;P41073-3	PEP_DROME	Pep	Zinc finger protein on ecdysone puffs	407000000	385000000	374000000	363000000	362000000	341000000	346000000	339000000	330000000	343000000	325000000	342000000		372000000	337500000	0.907258
P29413	CALR_DROME	Calr	Calreticulin	350000000	384000000	393000000	351000000	381000000	372000000	430000000	372000000	381000000	416000000	406000000	400000000		3.71833e+08	4.00833e+08	1.07799
Q7KW39;Q7KW39-2	MMSA_DROME	CG17896	Probable methylmalonate-semialdehyde/malonate-semialdehyde dehydrogenase [acylating], mitochondrial	340000000	389000000	388000000	349000000	355000000	406000000	390000000	388000000	425000000	397000000	409000000	368000000		3.71167e+08	3.96167e+08	1.06736
P91926	AP2A_DROME	AP-2alpha	AP-2 complex subunit alpha	358000000	376000000	371000000	366000000	363000000	387000000	409000000	416000000	424000000	406000000	404000000	435000000		3.70167e+08	4.15667e+08	1.12292
P09957;Q9VG09;Q9VG09-2	YELF_DROME;YELL_DROME	y;yellow-f	Protein yellow		392000000	307000000	409000000	382000000	359000000								369800000	#DIV/0!	#DIV/0!
O97477	INO1_DROME	Inos	Inositol-3-phosphate synthase	355000000	374000000	369000000	400000000	380000000	339000000	293000000	303000000	325000000	314000000	351000000	320000000		369500000	3.17667e+08	0.85972
Q9VZ19	Q9VZ19_DROME	Antdh	Antdh	392000000	367000000	383000000	381000000	329000000	365000000	430000000	443000000	438000000	448000000	454000000	469000000		369500000	447000000	1.20974
Q9VNL0	Q9VNL0_DROME	Gasp	Gasp, isoform A	428000000	386000000	351000000	345000000	329000000	373000000	390000000	353000000	373000000	366000000	336000000	350000000		3.68667e+08	3.61333e+08	0.980108
A0A0B4KFE2;B7Z0U7;E1JJ78	A0A0B4KFE2_DROME;B7Z0U7_DROME;E1JJ78_DROME	lap	Like-AP180, isoform I	393000000	371000000	371000000	350000000	362000000	361000000	359000000	386000000	411000000	407000000	373000000	412000000		368000000	3.91333e+08	1.06341
Q59E07	Q59E07_DROME	BcDNA:GH02439	Uncharacterized protein, isoform C	381000000	354000000	383000000	390000000	376000000	320000000	370000000	384000000	356000000	325000000	395000000	372000000		3.67333e+08	367000000	0.999093
Q9VTC3	Q9VTC3_DROME	Dmel\CG6409	GH07049p	332000000	375000000	382000000	343000000	405000000	360000000	297000000	281000000	318000000	278000000	305000000	322000000		3.66167e+08	3.00167e+08	0.819754
Q9VZ71	Q9VZ71_DROME	Dmel\CG15211	RE01453p	369000000	334000000	369000000	403000000	394000000	321000000	339000000	370000000	295000000	306000000	339000000	366000000		365000000	3.35833e+08	0.920091
A0A0B4K7H3	A0A0B4K7H3_DROME	euc	Eucalyptus, isoform B	361000000	375000000	349000000	345000000	386000000	353000000	360000000	377000000	371000000	393000000	405000000	506000000		361500000	402000000	1.11203
Q9W0S7	SND1_DROME	Tudor-SN	Staphylococcal nuclease domain-containing protein 1	355000000	340000000	370000000	354000000	379000000	368000000	351000000	345000000	330000000	355000000	347000000	332000000		361000000	3.43333e+08	0.951062
A8JTM7	A8JTM7_DROME	mgl	Megalin, isoform A	360000000	380000000	373000000	356000000	349000000	343000000	382000000	354000000	361000000	383000000	363000000	391000000		3.60167e+08	3.72333e+08	1.03378
Q9VRL1	Q9VRL1_DROME	Uev1A	GEO06356p1	320000000	364000000	387000000	398000000	359000000	325000000	377000000	362000000	380000000	375000000	376000000	368000000		3.58833e+08	373000000	1.03948
M9PDL2;Q9VJH2	M9PDL2_DROME;Q9VJH2_DROME	AspRS-m	Aspartyl-tRNA synthetase, mitochondrial, isoform D	379000000	341000000	374000000	348000000	376000000	321000000	377000000	342000000	351000000	351000000	356000000	365000000		356500000	357000000	1.0014
P91928	MIC60_DROME	Mitofilin	MICOS complex subunit Mic60	356000000	337000000	370000000	360000000	362000000	345000000	338000000	347000000	335000000	325000000	334000000	357000000		355000000	3.39333e+08	0.955869
Q9VSK4	Q9VSK4_DROME	Dmel\CG6983	Adipose-secreted signaling protein	356000000	383000000	362000000	356000000	333000000	338000000	433000000	411000000	416000000	427000000	434000000	424000000		3.54667e+08	4.24167e+08	1.19596
Q9VJZ4	Q9VJZ4_DROME	ND-B22	NADH dehydrogenase [ubiquinone] 1 beta subcomplex subunit 9	261000000	416000000	408000000	312000000	361000000	370000000	458000000	407000000	440000000	422000000	415000000	431000000		3.54667e+08	4.28833e+08	1.20912
P20477	GLNA1_DROME	Gs1	Glutamine synthetase 1, mitochondrial	287000000	406000000	378000000	323000000	370000000	361000000	499000000	402000000	468000000	449000000	429000000	418000000		3.54167e+08	4.44167e+08	1.25412
Q9VMQ9	Q9VMQ9_DROME	cl	Thioredoxin domain-containing protein 17	342000000	356000000	337000000	365000000	357000000	367000000	292000000	291000000	351000000	332000000	319000000	322000000		354000000	3.17833e+08	0.897834
Q9U616	GCSH_DROME	ppl	Glycine cleavage system H protein, mitochondrial	350000000	292000000	386000000	319000000	386000000	390000000	338000000	364000000	332000000	323000000	346000000	288000000		3.53833e+08	3.31833e+08	0.937824
Q9VJ59	Q9VJ59_DROME	Jwa	PRA1 family protein	359000000	310000000	367000000	381000000	358000000	347000000	275000000	310000000	285000000	278000000	297000000	310000000		3.53667e+08	292500000	0.82705
Q9W140	Q9W140_DROME	Dmel\CG3548	Regulatory protein zeste	326000000	331000000	361000000	381000000	356000000	355000000	335000000	355000000	359000000	348000000	387000000	361000000		3.51667e+08	357500000	1.01659
Q9VBS7	Q9VBS7_DROME	Dmel\CG10550	Uncharacterized protein, isoform B	359000000	377000000	380000000	306000000	380000000	303000000	352000000	325000000	312000000	336000000	333000000	310000000		3.50833e+08	328000000	0.934917
Q9VCI3	LSD1_DROME	Lsd-1	Lipid storage droplets surface-binding protein 1	330000000	318000000	413000000	332000000	310000000	400000000	619000000	571000000	547000000	560000000	463000000	414000000		350500000	529000000	1.50927
C4NYP8;Q86DS1	F10A1_DROME;F10A2_DROME	HIP;HIP-R	Hsc70-interacting protein 1	357000000	385000000	341000000	351000000	320000000	345000000	368000000	350000000	357000000	393000000	375000000	372000000		3.49833e+08	3.69167e+08	1.05526
O62530	O62530_DROME	AP-2mu	Adaptor protein complex 2, mu subunit, isoform A	316000000	368000000	344000000	353000000	364000000	338000000	384000000	394000000	363000000	366000000	368000000	403000000		3.47167e+08	3.79667e+08	1.09361
Q7JXZ2	Q7JXZ2_DROME	Cth	cystathionine gamma-lyase	332000000	325000000	368000000	343000000	360000000	344000000	271000000	324000000	300000000	305000000	300000000	286000000		3.45333e+08	2.97667e+08	0.861969
Q8T390	SH3G3_DROME	EndoA	Endophilin-A	317000000	393000000	361000000	340000000	311000000	336000000	396000000	359000000	423000000	386000000	393000000	418000000		343000000	3.95833e+08	1.15403
A1ZB79	A1ZB79_DROME	Dmel\CG5174	Uncharacterized protein, isoform M	337000000	322000000	329000000	360000000	372000000	327000000	353000000	387000000	324000000	357000000	376000000	378000000		3.41167e+08	362500000	1.06253
Q9VAN0	SERC_DROME	CG11899	Probable phosphoserine aminotransferase	365000000	338000000	374000000	311000000	333000000	325000000	341000000	370000000	381000000	346000000	371000000	327000000		341000000	356000000	1.04399
O96553;O96553-2	C1TC_DROME	pug	C-1-tetrahydrofolate synthase, cytoplasmic	369000000	339000000	408000000	283000000	314000000	329000000	240000000	274000000	240000000	248000000	267000000	221000000		3.40333e+08	2.48333e+08	0.729677
Q8IMJ0;Q0KHY8	Q0KHY8_DROME;Q8IMJ0_DROME	VhaAC45RP	Uncharacterized protein, isoform B	334000000	353000000	336000000	340000000	357000000	318000000	336000000	368000000	342000000	332000000	342000000	368000000		3.39667e+08	348000000	1.02453
Q06943	HMGZ_DROME	HmgZ	High mobility group protein Z	335000000	375000000	313000000	339000000	341000000	334000000	326000000	330000000	340000000	328000000	312000000	309000000		339500000	3.24167e+08	0.954836
Q76NQ0	Q76NQ0_DROME	CG5364	Dolichyl-diphosphooligosaccharide--protein glycosyltransferase subunit 1	258000000	399000000	350000000	336000000	326000000	361000000	354000000	342000000	372000000	378000000	357000000	346000000		3.38333e+08	3.58167e+08	1.05862
A8JRH3	A8JRH3_DROME	tmod	FI20012p1	361000000	349000000	294000000	344000000	355000000	324000000	342000000	365000000	351000000	350000000	357000000	391000000		3.37833e+08	3.59333e+08	1.06364
Q7KN75	Q7KN75_DROME	Dp1	Dodeca-satellite-binding protein 1, isoform A	328000000	308000000	354000000	343000000	334000000	349000000	297000000	334000000	312000000	303000000	332000000	291000000		336000000	311500000	0.927083
Q9W077	Q9W077_DROME	Cpr62Bc	Cuticular protein 62Bc, isoform A	450000000	228000000	312000000	330000000	373000000	321000000	370000000	257000000	352000000	325000000	315000000	251000000		3.35667e+08	3.11667e+08	0.9285
Q9W022	Q9W022_DROME	Dmel\CG8993	GEO01508p1	333000000	330000000	338000000	351000000	342000000	316000000	331000000	344000000	360000000	348000000	379000000	381000000		335000000	3.57167e+08	1.06617
Q9V3V6	Q9V3V6_DROME	Rpt5	26S proteasome regulatory complex subunit p50	336000000	311000000	333000000	341000000	353000000	332000000	318000000	349000000	336000000	328000000	332000000	341000000		3.34333e+08	334000000	0.999003
Q9VHR8;Q9VHR8-2	DPP3_DROME	DppIII	Dipeptidyl peptidase 3	335000000	319000000	328000000	327000000	352000000	336000000	311000000	329000000	304000000	318000000	317000000	316000000		3.32833e+08	3.15833e+08	0.948923
P91941	P91941_DROME	Acp65Aa	Adult cuticle protein 65Aa	299000000	321000000	251000000	312000000	452000000	361000000	457000000	270000000	465000000	517000000	441000000	484000000		3.32667e+08	439000000	1.31964
Q9VG96	GSTD4_DROME	GstD4	Glutathione S-transferase D4	123000000	440000000	373000000	272000000	297000000	490000000	315000000	277000000	312000000	356000000	388000000	316000000		332500000	3.27333e+08	0.984461
P12881	PSA1_DROME	Prosalpha6	Proteasome subunit alpha type-1	325000000	354000000	339000000	323000000	329000000	319000000	317000000	310000000	333000000	318000000	308000000	337000000		331500000	320500000	0.966817
P05661-4	MYSA_DROME	Mhc	Isoform 3b of Myosin heavy chain, muscle	328000000	311000000	303000000	232000000	371000000	437000000	404000000	341000000	377000000	373000000	337000000	271000000		3.30333e+08	350500000	1.06105
Q9V3U6	Q9V3U6_DROME	CtsK1	26-29kD-proteinase	333000000	320000000	328000000	325000000	337000000	334000000	207000000	224000000	216000000	224000000	245000000	229000000		329500000	2.24167e+08	0.680324
Q9VXF1	PP2B3_DROME	CanA-14F	Serine/threonine-protein phosphatase 2B catalytic subunit 3	325000000	345000000	314000000	342000000	321000000	330000000	369000000	336000000	393000000	370000000	371000000	366000000		329500000	367500000	1.11533
Q8T6I0;Q8T8W3	Q8T6I0_DROME;Q8T8W3_DROME	Past1	EH domain containing protein	296000000	320000000	351000000	337000000	323000000	336000000	339000000	349000000	356000000	362000000	353000000	333000000		3.27167e+08	3.48667e+08	1.06572
P10379	UZIP_DROME	uzip	Protein unzipped	300000000	327000000	314000000	327000000	335000000	341000000	345000000	347000000	359000000	348000000	342000000	354000000		324000000	3.49167e+08	1.07767
A0A0B4KFE4;A1Z7H2;A1Z7H3;Q8T3L1	A0A0B4KFE4_DROME;A1Z7H2_DROME;A1Z7H3_DROME;Q8T3L1_DROME	Acsl	long-chain-fatty-acid--CoA ligase	349000000	297000000	348000000	321000000	319000000	308000000	387000000	387000000	369000000	384000000	380000000	335000000		3.23667e+08	3.73667e+08	1.15448
Q9W3L4	Q9W3L4_DROME	Dmel\CG2233	GH20802p	384000000	334000000	412000000	251000000	272000000	286000000	190000000	198000000	159000000	173000000	220000000	173000000		3.23167e+08	185500000	0.574007
Q7JYH3	Q7JYH3_DROME	ND-B14.7	NADH dehydrogenase [ubiquinone] 1 alpha subcomplex subunit 11	335000000	334000000	351000000	315000000	266000000	327000000	348000000	374000000	274000000	287000000	316000000	283000000		3.21333e+08	3.13667e+08	0.976141
Q6IHY5	Q6IHY5_DROME	COX7AL2	Cytochrome c oxidase subunit 7A-like 2, isoform A	372000000	405000000	314000000	315000000	289000000	223000000	408000000	366000000	341000000	353000000	376000000	451000000		3.19667e+08	382500000	1.19656
Q24547	STX1A_DROME	Syx1A	Syntaxin-1A	305000000	344000000	304000000	299000000	315000000	350000000	392000000	310000000	437000000	412000000	422000000	373000000		319500000	391000000	1.22379
E1JHA6	E1JHA6_DROME	uif	Uninflatable, isoform C	334000000	304000000	314000000	316000000	345000000	303000000	296000000	292000000	287000000	301000000	287000000	299000000		3.19333e+08	2.93667e+08	0.919624
Q9V521	PPO2_DROME	PPO2	Phenoloxidase 2	317000000	339000000	298000000	340000000	300000000	315000000	257000000	209000000	181000000	183000000	170000000	228000000		3.18167e+08	2.04667e+08	0.643269
A0A0B4LG95;A0A0B4LGC6;Q7K274;Q8MLS7	A0A0B4LG95_DROME;A0A0B4LGC6_DROME;Q7K274_DROME;Q8MLS7_DROME	l(2)k09913	Lethal (2) k09913, isoform F	301000000	323000000	308000000	362000000	304000000	310000000	340000000	341000000	322000000	317000000	342000000	326000000		318000000	3.31333e+08	1.04193
Q9VT23	Q9VT23_DROME	SP170	Peptidase S1 domain-containing protein	251000000	356000000	368000000	334000000	252000000	337000000	308000000	279000000	338000000	364000000	286000000	338000000		3.16333e+08	3.18833e+08	1.0079
P23696	PP2A_DROME	mts	Serine/threonine-protein phosphatase PP2A	302000000	319000000	312000000	306000000	300000000	359000000	339000000	331000000	345000000	361000000	353000000	340000000		3.16333e+08	3.44833e+08	1.09009
A0A0B4KEW6	A0A0B4KEW6_DROME	Amph	Amphiphysin, isoform B	284000000	321000000	298000000	306000000	308000000	378000000	321000000	304000000	328000000	344000000	319000000	314000000		3.15833e+08	3.21667e+08	1.01847
Q9VL69	Q9VL69_DROME	CK01296	Translocon-associated protein subunit gamma	330000000	294000000	314000000	339000000	297000000	321000000	321000000	349000000	321000000	363000000	367000000	312000000		3.15833e+08	3.38833e+08	1.07282
Q7JPS2	Q7JPS2_DROME	igl	Igloo, isoform A	318000000	323000000	311000000	298000000	343000000	300000000	335000000	352000000	375000000	337000000	378000000	359000000		315500000	356000000	1.12837
A0A126GUN6	A0A126GUN6_DROME	Zasp52	Z band alternatively spliced PDZ-motif protein 52, isoform X	342000000	320000000	354000000	288000000	296000000	290000000	298000000	347000000	286000000	273000000	294000000	299000000		315000000	299500000	0.950794
Q9VI64	Q9VI64_DROME	Dmel\CG10098	LD30995p	324000000	321000000	275000000	326000000	319000000	315000000	317000000	309000000	306000000	337000000	323000000	335000000		3.13333e+08	3.21167e+08	1.025
M9PDV2;Q9W441	M9PDV2_DROME;Q9W441_DROME	Tsp5D	Tetraspanin	351000000	295000000	339000000	339000000	318000000	237000000	285000000	306000000	238000000	276000000	291000000	285000000		3.13167e+08	2.80167e+08	0.894625
Q9VXY7	LSD2_DROME	Lsd-2	Lipid storage droplets surface-binding protein 2	319000000	274000000	361000000	330000000	278000000	313000000	571000000	564000000	476000000	479000000	494000000	437000000		312500000	503500000	1.6112
M9MRD1	MS300_DROME	Msp300	Muscle-specific protein 300 kDa	294000000	318000000	315000000	300000000	316000000	325000000	322000000	300000000	333000000	322000000	323000000	312000000		3.11333e+08	3.18667e+08	1.02355
Q9VN91	MORN4_DROME	rtp	MORN repeat-containing protein 4 homolog	284000000	356000000	324000000	274000000	292000000	337000000	393000000	342000000	343000000	339000000	338000000	321000000		3.11167e+08	346000000	1.11194
A0A0B4KFZ1;D1Z394;Q6NR72;Q8MLR2	A0A0B4KFZ1_DROME;D1Z394_DROME;Q6NR72_DROME;Q8MLR2_DROME	Eglp4	Entomoglyceroporin 4, isoform F	224000000	323000000	313000000	327000000	333000000	335000000	270000000	269000000	303000000	319000000	300000000	292000000		3.09167e+08	2.92167e+08	0.945013
Q4LDP7;Q9I7R1	Q4LDP7_DROME;Q9I7R1_DROME	Dmel\CG5946	NADH-cytochrome b5 reductase	319000000	298000000	316000000	298000000	309000000	315000000	310000000	301000000	314000000	308000000	301000000	312000000		3.09167e+08	3.07667e+08	0.995148
P29310	1433Z_DROME	14-3-3zeta	14-3-3 protein zeta	367000000	291000000	249000000	330000000	319000000	284000000	273000000	243000000	218000000	265000000	299000000	293000000		3.06667e+08	2.65167e+08	0.864674
Q9V8R9	EPB41_DROME	cora	Protein 4.1 homolog	303000000	295000000	308000000	310000000	306000000	309000000	307000000	316000000	311000000	321000000	310000000	318000000		3.05167e+08	3.13833e+08	1.0284
Q0E9B6	RS11_DROME	RpS11	Small ribosomal subunit protein uS17	283000000	314000000	348000000	277000000	275000000	329000000	262000000	316000000	272000000	289000000	263000000	238000000		3.04333e+08	2.73333e+08	0.898138
Q86BQ4;Q8STA5	Q86BQ4_DROME;Q8STA5_DROME	HINT1	Histidine triad nucleotide binding protein 1, isoform B	330000000	313000000	303000000	299000000	299000000	282000000	361000000	346000000	349000000	379000000	330000000	341000000		3.04333e+08	351000000	1.15334
D1YSG0	D1YSG0_DROME	bt	Bent, isoform F	295000000	308000000	313000000	302000000	299000000	302000000	297000000	292000000	295000000	292000000	295000000	299000000		3.03167e+08	295000000	0.973062
Q9VA83	FRIL_DROME	Fer2LCH	Ferritin light chain	407000000	332000000	267000000	350000000	247000000	214000000	273000000	276000000	333000000	318000000	217000000	270000000		3.02833e+08	2.81167e+08	0.928453
Q9VGF7	Q9VGF7_DROME	GC1	Glutamate carrier 1, isoform A	311000000	299000000	307000000	331000000	294000000	274000000	322000000	332000000	309000000	303000000	316000000	353000000		3.02667e+08	322500000	1.06553
Q9VZG2	Q9VZG2_DROME	Cpr64Aa	Cuticular protein 64Aa	331000000	192000000	301000000	320000000	357000000	314000000	271000000	231000000	274000000	287000000	250000000	278000000		302500000	2.65167e+08	0.876584
Q9VW59	Q9VW59_DROME	RhoGDI	LD16419p	281000000	303000000	284000000	314000000	325000000	306000000	318000000	266000000	305000000	293000000	290000000	318000000		3.02167e+08	2.98333e+08	0.987314
Q95TZ7	Q95TZ7_DROME	Zasp66	GH19182p	318000000	301000000	317000000	318000000	294000000	265000000	289000000	300000000	316000000	302000000	296000000	321000000		3.02167e+08	304000000	1.00607
Q9VN71	Q9VN71_DROME	Jhbp3	Uncharacterized protein, isoform A	289000000	323000000	292000000	282000000	330000000	295000000	246000000	286000000	285000000	297000000	327000000	290000000		3.01833e+08	288500000	0.955826
Q8MT58	Q8MT58_DROME	Cndp2	Carnosine dipeptidase 2, isoform A	299000000	303000000	300000000	306000000	308000000	295000000	307000000	301000000	308000000	310000000	321000000	323000000		3.01833e+08	3.11667e+08	1.03258
P17336	CATA_DROME	Cat	Catalase	302000000	343000000	319000000	304000000	269000000	271000000	313000000	279000000	281000000	291000000	274000000	290000000		3.01333e+08	288000000	0.955752
A0A0B4KGY6-7	NOVA_DROME	ps	Isoform M of RNA-binding protein Pasilla	312000000	293000000	282000000	286000000	307000000	326000000	276000000	278000000	314000000	299000000	303000000	288000000		301000000	293000000	0.973422
E2QCY9	E2QCY9_DROME	Syn	Synapsin, isoform D	303000000	294000000	302000000	298000000	300000000	309000000	323000000	313000000	360000000	332000000	347000000	353000000		301000000	338000000	1.12292
Q9VDE2	Q9VDE2_DROME	Dmel\CG5793	Uncharacterized protein, isoform B	293000000	306000000	345000000	286000000	286000000	287000000	259000000	254000000	249000000	233000000	261000000	229000000		300500000	247500000	0.823627
Q94518	NACA_DROME	Nacalpha	Nascent polypeptide-associated complex subunit alpha	317000000	303000000	313000000	311000000	275000000	277000000	267000000	305000000	273000000	283000000	267000000	264000000		2.99333e+08	276500000	0.923719
M9PEG1	M9PEG1_DROME	Dmel\CG44195	Uncharacterized protein	272000000	323000000	331000000	262000000	287000000	314000000	298000000	302000000	338000000	331000000	330000000	306000000		2.98167e+08	317500000	1.06484
Q9VAM6	CISD2_DROME	Cisd2	CDGSH iron-sulfur domain-containing protein 2 homolog	246000000	371000000	293000000	280000000	281000000	316000000	385000000	328000000	354000000	365000000	363000000	349000000		2.97833e+08	3.57333e+08	1.19978
P21187	PABP_DROME	pAbp	Polyadenylate-binding protein	290000000	292000000	291000000	281000000	291000000	321000000	309000000	299000000	317000000	319000000	317000000	300000000		2.94333e+08	3.10167e+08	1.05379
P55035	PSMD4_DROME	Rpn10	26S proteasome non-ATPase regulatory subunit 4	293000000	289000000	295000000	297000000	308000000	273000000	290000000	287000000	290000000	288000000	294000000	294000000		292500000	290500000	0.993162
C0HK92	Y5076_DROME	CG45076	Uncharacterized protein CG45076	265000000	301000000	289000000	272000000	291000000	333000000	323000000	290000000	365000000	338000000	321000000	341000000		2.91833e+08	3.29667e+08	1.12964
Q9VK69	Q9VK69_DROME	CCT4	T-complex protein 1 subunit delta	302000000	281000000	303000000	283000000	298000000	283000000	279000000	291000000	268000000	261000000	275000000	261000000		2.91667e+08	272500000	0.934286
Q9VJQ3	Q9VJQ3_DROME	yellow-c	RH54244p	287000000	298000000	267000000	281000000	311000000	301000000	261000000	247000000	247000000	255000000	227000000	269000000		2.90833e+08	251000000	0.863037
Q9VFC2	SP88E_DROME	Spn88Ea	Serine protease inhibitor 88Ea	277000000	308000000	281000000	295000000	316000000	267000000	211000000	229000000	226000000	221000000	210000000	238000000		2.90667e+08	222500000	0.765482
Q24253	Q24253_DROME	AP-1-2beta	AP complex subunit beta	300000000	297000000	304000000	294000000	271000000	277000000	332000000	316000000	322000000	330000000	327000000	307000000		290500000	3.22333e+08	1.10958
Q9V3I2	RAB5_DROME	Rab5	Ras-related protein Rab5	296000000	282000000	284000000	304000000	293000000	283000000	306000000	309000000	304000000	340000000	323000000	351000000		2.90333e+08	3.22167e+08	1.10964
Q7KLV9	PSD11_DROME	Rpn6	26S proteasome non-ATPase regulatory subunit 11	288000000	301000000	302000000	283000000	288000000	276000000	299000000	305000000	316000000	287000000	285000000	288000000		2.89667e+08	2.96667e+08	1.02417
Q9VR31	Q9VR31_DROME	Fnta	Protein farnesyltransferase/geranylgeranyltransferase type-1 subunit alpha	280000000	258000000	283000000	357000000	291000000	266000000	269000000	281000000	282000000	288000000	272000000	276000000		2.89167e+08	278000000	0.961383
M9PDZ6;M9PEA0	M9PDZ6_DROME;M9PEA0_DROME	sls	Sallimus, isoform Q	301000000	280000000	273000000	264000000	287000000	323000000	252000000	275000000	290000000	291000000	275000000	281000000		288000000	2.77333e+08	0.962963
Q9VJ43	Q9VJ43_DROME	ScpX	Sterol carrier protein 2	277000000	266000000	291000000	307000000	299000000	288000000	325000000	302000000	288000000	307000000	303000000	343000000		288000000	3.11333e+08	1.08102
A0A0B4K7K9;A1Z7V1;A8DY79	A0A0B4K7K9_DROME;A1Z7V1_DROME;A8DY79_DROME	brp	Bruchpilot, isoform J	298000000	282000000	254000000	303000000	302000000	288000000	280000000	260000000	385000000	352000000	312000000	319000000		2.87833e+08	318000000	1.10481
Q9W4Y3	Q9W4Y3_DROME	trol	Terribly reduced optic lobes, isoform AT	290000000	279000000	262000000	267000000	322000000	306000000	298000000	306000000	305000000	343000000	290000000	331000000		2.87667e+08	3.12167e+08	1.08517
Q8MSI2	Q8MSI2_DROME	Scp1	GH15296p	237000000	464000000	240000000	250000000	225000000	302000000	343000000	265000000	301000000	280000000	299000000	312000000		2.86333e+08	300000000	1.04773
Q9VKW5	Q9VKW5_DROME	Dmel\CG5355	Prolyl endopeptidase	260000000	312000000	283000000	289000000	276000000	295000000	305000000	288000000	303000000	308000000	310000000	314000000		2.85833e+08	3.04667e+08	1.06589
Q9VXK7	Q9VXK7_DROME	ND-20	LD31474p	165000000	360000000	321000000	236000000	283000000	350000000	373000000	350000000	355000000	339000000	368000000	333000000		2.85833e+08	353000000	1.23499
P61209	ARF1_DROME	Arf1	ADP-ribosylation factor 1	240000000	300000000	263000000	281000000	319000000	299000000	353000000	366000000	338000000	336000000	342000000	323000000		2.83667e+08	343000000	1.20917
Q9W380	Q9W380_DROME	NdufA3	RH45008p	262000000	282000000	281000000	325000000	257000000	291000000	296000000	280000000	279000000	274000000	289000000	294000000		283000000	2.85333e+08	1.00824
A1Z992	A1Z992_DROME	Agbe	1,4-alpha-glucan branching enzyme	265000000	293000000	315000000	273000000	271000000	277000000	254000000	244000000	270000000	294000000	265000000	231000000		2.82333e+08	2.59667e+08	0.919717
Q9V3W0	UK114_DROME	UK114	RutC family protein UK114	272000000	297000000	306000000	256000000	265000000	296000000	235000000	256000000	250000000	248000000	245000000	205000000		282000000	2.39833e+08	0.850473
P16914;P16914-2	ELAV_DROME	elav	Protein elav	299000000	255000000	273000000	284000000	303000000	275000000	263000000	300000000	253000000	268000000	269000000	276000000		281500000	271500000	0.964476
A0A0B4KEJ7	A0A0B4KEJ7_DROME	coro	Coronin	253000000	293000000	286000000	269000000	294000000	282000000	280000000	291000000	270000000	290000000	287000000	280000000		279500000	283000000	1.01252
Q9VDT5	Q9VDT5_DROME	anon-WO02059370.13	Carboxypeptidase	315000000	298000000	269000000	281000000	244000000	266000000	230000000	193000000	229000000	244000000	249000000	228000000		2.78833e+08	2.28833e+08	0.820681
Q9W596	FUTSC_DROME	futsch	Microtubule-associated protein futsch	266000000	282000000	292000000	270000000	282000000	281000000	306000000	298000000	325000000	315000000	318000000	316000000		2.78833e+08	313000000	1.12253
Q7JYW9	Q7JYW9_DROME	Hex-C	Phosphotransferase	322000000	265000000	324000000	250000000	249000000	260000000	235000000	286000000	254000000	260000000	257000000	201000000		2.78333e+08	2.48833e+08	0.894012
P17276	PH4H_DROME	Hn	Protein henna	297000000	292000000	280000000	249000000	269000000	283000000	282000000	271000000	279000000	285000000	297000000	268000000		2.78333e+08	2.80333e+08	1.00719
Q7KV34	Q7KV34_DROME	pkm	CHK kinase-like domain-containing protein	252000000	310000000	265000000	250000000	302000000	291000000	309000000	280000000	305000000	328000000	322000000	335000000		2.78333e+08	3.13167e+08	1.12515
Q24212	STNB_DROME	stnB	Protein stoned-B	262000000	265000000	279000000	283000000	290000000	276000000	270000000	275000000	277000000	275000000	271000000	287000000		2.75833e+08	2.75833e+08	1
Q95029;Q95029-2	CATL1_DROME	CtsL1	Cathepsin L1	310000000	259000000	252000000	291000000	266000000	272000000	208000000	218000000	188000000	221000000	216000000	203000000		275000000	209000000	0.76
M9PF46;Q9VT33	M9PF46_DROME;Q9VT33_DROME	Prps	Ribose-phosphate pyrophosphokinase 2	287000000	293000000	286000000	248000000	248000000	287000000	263000000	260000000	232000000	257000000	274000000	237000000		2.74833e+08	2.53833e+08	0.92359
B7YZQ3	B7YZQ3_DROME	prom	Prominin, isoform D	285000000	262000000	273000000	294000000	261000000	270000000	281000000	282000000	305000000	287000000	300000000	294000000		2.74167e+08	291500000	1.06322
Q9VAJ9	Q9VAJ9_DROME	Dmel\CG1907	Mitochondrial 2-oxoglutarate/malate carrier protein	216000000	302000000	325000000	242000000	271000000	286000000	293000000	283000000	297000000	287000000	282000000	287000000		2.73667e+08	2.88167e+08	1.05298
A0A4D6K3W6	A0A4D6K3W6_DROME	ras	Inosine-5'-monophosphate dehydrogenase	304000000	248000000	256000000	268000000	297000000	268000000	209000000	224000000	212000000	240000000	219000000	228000000		273500000	222000000	0.8117
Q9V3Y4	Q9V3Y4_DROME	Mtch	LD43650p	241000000	268000000	306000000	274000000	274000000	274000000	265000000	278000000	277000000	269000000	272000000	276000000		2.72833e+08	2.72833e+08	1
A0A0B4LIT4	A0A0B4LIT4_DROME	tau	Microtubule-associated protein	206000000	314000000	273000000	234000000	262000000	346000000	389000000	271000000	364000000	380000000	350000000	329000000		272500000	3.47167e+08	1.27401
Q9VB81	Q9VB81_DROME	Cpr97Eb	Cuticular protein 97Eb	286000000	247000000	280000000	275000000	275000000	272000000	364000000	319000000	393000000	374000000	321000000	365000000		272500000	356000000	1.30642
M9PCE5;Q9VU94	M9PCE5_DROME;Q9VU94_DROME	Hml	Hemolectin, isoform B	336000000	290000000	230000000	237000000	295000000	241000000	220000000	222000000	231000000	193000000	156000000	207000000		271500000	2.04833e+08	0.754451
Q9VEY0	Q9VEY0_DROME	Dmel\CG8927	Uncharacterized protein, isoform C	243000000	293000000	262000000	244000000	275000000	308000000	331000000	311000000	351000000	383000000	381000000	319000000		2.70833e+08	346000000	1.27754
Q8IRH1	Q8IRH1_DROME	Psa	FI19310p1	275000000	268000000	265000000	266000000	282000000	262000000	279000000	274000000	284000000	266000000	280000000	272000000		2.69667e+08	2.75833e+08	1.02287
Q9VA73-2	CMC_DROME	aralar1	Isoform 2 of Calcium-binding mitochondrial carrier protein Aralar1	259000000	258000000	302000000	262000000	250000000	282000000	261000000	248000000	248000000	265000000	263000000	225000000		2.68833e+08	2.51667e+08	0.936144
Q967S0	Q967S0_DROME	Prat2	Amidophosphoribosyltransferase	264000000	255000000	303000000	261000000	254000000	275000000	270000000	315000000	270000000	292000000	245000000	241000000		2.68667e+08	2.72167e+08	1.01303
Q03427	LAMC_DROME	LamC	Lamin-C	250000000	270000000	269000000	280000000	274000000	269000000	288000000	247000000	298000000	300000000	283000000	280000000		2.68667e+08	2.82667e+08	1.05211
Q9VLT7	Q9VLT7_DROME	RpL36A	Large ribosomal subunit protein eL42	279000000	269000000	270000000	238000000	312000000	242000000	238000000	289000000	293000000	241000000	268000000	274000000		2.68333e+08	2.67167e+08	0.995652
Q27377	OB10_DROME	a10	Putative odorant-binding protein A10	292000000	234000000	277000000	284000000	285000000	234000000	225000000	244000000	220000000	237000000	226000000	245000000		2.67667e+08	2.32833e+08	0.869863
Q9VXQ5	Q9VXQ5_DROME	CCT6	T-complex protein 1 subunit zeta	278000000	247000000	264000000	274000000	286000000	256000000	236000000	264000000	228000000	250000000	238000000	254000000		267500000	245000000	0.915888
Q9V5C6	PSA3_DROME	Prosalpha7	Proteasome subunit alpha type-3	259000000	300000000	259000000	258000000	262000000	267000000	291000000	266000000	253000000	265000000	256000000	281000000		267500000	2.68667e+08	1.00436
Q9VA37;Q9VA37-2	DJ1B_DROME	dj-1beta	Protein dj-1beta	270000000	258000000	275000000	278000000	269000000	250000000	252000000	278000000	249000000	245000000	262000000	257000000		2.66667e+08	2.57167e+08	0.964375
Q7YTZ0;Q9VTD7	Q7YTZ0_DROME;Q9VTD7_DROME	Dmel\CG7888	GH09436p	312000000	274000000	275000000	247000000	240000000	251000000	274000000	296000000	232000000	240000000	264000000	274000000		266500000	2.63333e+08	0.988118
Q8SY69	Q8SY69_DROME	RH61753p	MICOS complex subunit MIC10	325000000	271000000	312000000	294000000	192000000	193000000	240000000	264000000	161000000	157000000	211000000	182000000		264500000	202500000	0.765595
Q9VSR8	Q9VSR8_DROME	Dmel\CG5653	Amine oxidase domain-containing protein	285000000	271000000	250000000	258000000	268000000	255000000	252000000	258000000	260000000	271000000	257000000	270000000		264500000	2.61333e+08	0.988028
Q9V9S8	HEMH_DROME	FeCh	Ferrochelatase, mitochondrial	276000000	247000000	260000000	271000000	267000000	263000000	263000000	267000000	266000000	258000000	289000000	279000000		264000000	2.70333e+08	1.02399
Q9VRP2	Q9VRP2_DROME	BEST:CK00496	Uncharacterized protein, isoform A	293000000	249000000	270000000	276000000	254000000	239000000	215000000	254000000	236000000	244000000	267000000	235000000		263500000	2.41833e+08	0.917774
Q27268	DX39B_DROME	Hel25E	ATP-dependent RNA helicase WM6	275000000	257000000	272000000	261000000	255000000	261000000	289000000	277000000	273000000	278000000	284000000	295000000		263500000	2.82667e+08	1.07274
Q9Y125	Q9Y125_DROME	Sap-r	BcDNA.GH08312	295000000	270000000	250000000	259000000	265000000	237000000	236000000	241000000	198000000	229000000	221000000	245000000		2.62667e+08	2.28333e+08	0.869289
Q7K2X5;D0Z756	D0Z756_DROME;Q7K2X5_DROME	CG14762-RA;Dmel\CG14762	MIP14966p	271000000	260000000	246000000	261000000	287000000	250000000	299000000	298000000	313000000	289000000	307000000	315000000		262500000	303500000	1.15619
Q9VA41	Q9VA41_DROME	Npc2h	GEO08227p1	307000000	297000000	209000000	220000000	262000000	278000000	187000000	216000000	181000000	194000000	175000000	185000000		2.62167e+08	1.89667e+08	0.723458
Q95SI7	Q95SI7_DROME	Dmel\CG6028	GH23390p	267000000	243000000	265000000	267000000	268000000	263000000	267000000	273000000	265000000	242000000	267000000	262000000		2.62167e+08	2.62667e+08	1.00191
P27779	CUP7_DROME	Edg78E	Pupal cuticle protein Edg-78E	324000000	196000000	173000000	354000000	234000000	292000000	295000000	259000000	246000000	355000000	333000000	320000000		2.62167e+08	3.01333e+08	1.1494
Q9VF27	NDUS8_DROME	ND-23	NADH dehydrogenase (ubiquinone) 23 kDa subunit	243000000	320000000	273000000	250000000	292000000	190000000	210000000	209000000	243000000	239000000	251000000	212000000		2.61333e+08	2.27333e+08	0.869898
Q7KJ73	Q7KJ73_DROME	Tsp42Ee	Tetraspanin	333000000	249000000	277000000	242000000	239000000	225000000	222000000	232000000	199000000	240000000	222000000	214000000		2.60833e+08	221500000	0.849201
Q9VWV4	Q9VWV4_DROME	Nt5b	GH28326p	263000000	241000000	271000000	268000000	259000000	262000000	268000000	259000000	269000000	287000000	272000000	261000000		2.60667e+08	2.69333e+08	1.03325
Q9VL01	Q9VL01_DROME	Sph35	FI06461p	285000000	286000000	249000000	241000000	272000000	229000000	189000000	182000000	169000000	172000000	165000000	176000000		2.60333e+08	175500000	0.674136
Q9VBA0	Q9VBA0_DROME	Dmel\CG6330	GH09623p	290000000	252000000	257000000	252000000	262000000	249000000	268000000	272000000	247000000	238000000	253000000	255000000		2.60333e+08	255500000	0.981434
P05661-17;P05661-22	MYSA_DROME	Mhc	Isoform D of Myosin heavy chain, muscle	248000000	289000000	207000000	255000000	306000000	256000000	263000000	270000000	254000000	217000000	219000000	228000000		2.60167e+08	2.41833e+08	0.929532
Q9V3J1-2	VATH_DROME	VhaSFD	Isoform B of V-type proton ATPase subunit H	263000000	255000000	289000000	281000000	231000000	239000000	283000000	277000000	261000000	251000000	273000000	265000000		2.59667e+08	2.68333e+08	1.03338
Q9W2G8	Q9W2G8_DROME	Acox57D-d	Acyl-coenzyme A oxidase	214000000	184000000	307000000	274000000	249000000	328000000	308000000	247000000	296000000	273000000	320000000	235000000		2.59333e+08	2.79833e+08	1.07905
H8F4T3	H8F4T3_DROME	smp-30	MIP34848p1	244000000	282000000	299000000	221000000	256000000	248000000	233000000	218000000	219000000	234000000	223000000	188000000		2.58333e+08	2.19167e+08	0.848387
Q8MLS1	Q8MLS1_DROME	Mthfs	5-formyltetrahydrofolate cyclo-ligase	307000000	250000000	297000000	222000000	230000000	243000000	279000000	316000000	246000000	278000000	301000000	251000000		2.58167e+08	278500000	1.07876
Q9VQT5	Q9VQT5_DROME	CT37177	FI01556p	333000000	269000000	228000000	234000000	269000000	210000000	182000000	209000000	134000000	144000000	134000000	175000000		2.57167e+08	163000000	0.63383
P08879	NDKA_DROME	awd	Nucleoside diphosphate kinase	213000000	466000000	219000000	190000000	198000000	251000000	237000000	260000000	234000000	250000000	219000000	235000000		2.56167e+08	2.39167e+08	0.933637
Q95083	PSA5_DROME	Prosalpha5	Proteasome subunit alpha type-5	278000000	276000000	244000000	262000000	268000000	209000000	249000000	252000000	232000000	228000000	242000000	246000000		2.56167e+08	241500000	0.942746
A1Z9M2	A1Z9M2_DROME	ReepB	Receptor expression-enhancing protein	245000000	272000000	274000000	221000000	252000000	258000000	314000000	292000000	286000000	301000000	284000000	288000000		2.53667e+08	2.94167e+08	1.15966
Q9W2E8	Q9W2E8_DROME	ND-B12	NADH dehydrogenase [ubiquinone] 1 beta subcomplex subunit 3	216000000	273000000	332000000	222000000	282000000	197000000	288000000	336000000	379000000	305000000	392000000	201000000		2.53667e+08	3.16833e+08	1.24901
Q9VBY7;Q8IMT8	Q8IMT8_DROME;Q9VBY7_DROME	veli	Protein lin-7 homolog	242000000	257000000	250000000	261000000	248000000	257000000	250000000	248000000	258000000	287000000	267000000	275000000		252500000	2.64167e+08	1.0462
Q9VP68;Q8IPT9;Q8IPU0	Q8IPT9_DROME;Q8IPU0_DROME;Q9VP68_DROME	Dmel\CG10512	SD05439p1	302000000	248000000	280000000	232000000	229000000	220000000	227000000	243000000	210000000	225000000	233000000	232000000		2.51833e+08	2.28333e+08	0.906684
Q9VJZ6	Q9VJZ6_DROME	Grx3	LD40224p	259000000	244000000	255000000	252000000	260000000	241000000	238000000	249000000	240000000	235000000	237000000	231000000		2.51833e+08	2.38333e+08	0.946393
Q9VK60	Q9VK60_DROME	Dmel\CG6180	GH25425p	253000000	252000000	267000000	258000000	238000000	240000000	293000000	203000000	326000000	307000000	312000000	284000000		2.51333e+08	287500000	1.1439
Q7KTW5	Q7KTW5_DROME	Dmel\CG9391	Inositol-1-monophosphatase	235000000	237000000	261000000	257000000	261000000	256000000	256000000	277000000	286000000	286000000	303000000	285000000		2.51167e+08	2.82167e+08	1.12342
A8DZ14	A8DZ14_DROME	Fas3	FI17828p1	230000000	250000000	260000000	252000000	263000000	249000000	226000000	242000000	231000000	223000000	203000000	213000000		2.50667e+08	223000000	0.889628
P18053	PSA4_DROME	Prosalpha3	Proteasome subunit alpha type-4	230000000	287000000	251000000	245000000	247000000	244000000	274000000	231000000	260000000	258000000	251000000	244000000		2.50667e+08	253000000	1.00931
Q9VCW6	Q9VCW6_DROME	Gclm	GCS light chain	272000000	266000000	249000000	239000000	228000000	240000000	234000000	257000000	246000000	258000000	241000000	257000000		249000000	2.48833e+08	0.999331
A0A0B4KFA6;A0A0B4KGE4;Q9VHX9	A0A0B4KFA6_DROME;A0A0B4KGE4_DROME;Q9VHX9_DROME	CD98hc	alpha-glucosidase	254000000	246000000	246000000	249000000	251000000	246000000	256000000	258000000	247000000	258000000	253000000	265000000		2.48667e+08	2.56167e+08	1.03016
Q24208	IF2G_DROME	eIF2gamma	Eukaryotic translation initiation factor 2 subunit 3	225000000	243000000	264000000	240000000	253000000	266000000	248000000	269000000	254000000	254000000	262000000	252000000		248500000	256500000	1.03219
Q8IN44	TOTA_DROME	TotA	Protein Turandot A	320000000	213000000	193000000	224000000	207000000	326000000	150000000	184000000	285000000	124000000	163000000	107000000		2.47167e+08	1.68833e+08	0.683075
A8DYH2	UFM1_DROME	Ufm1	Ubiquitin-fold modifier 1	246000000	221000000	243000000	270000000	253000000	246000000	185000000	223000000	217000000	200000000	221000000	203000000		246500000	2.08167e+08	0.84449
Q8STG9	Q8STG9_DROME	Sec61alpha	DSec61alpha	227000000	235000000	291000000	267000000	213000000	246000000	268000000	261000000	234000000	222000000	266000000	235000000		246500000	2.47667e+08	1.00473
P92181	P92181_DROME	Lcp65Ac	Cuticle protein DCP2	216000000	265000000	211000000	282000000	290000000	212000000	194000000	205000000	279000000	272000000	226000000	302000000		246000000	2.46333e+08	1.00136
Q7JWF1	Q7JWF1_DROME	Etf-QO	Electron transfer flavoprotein-ubiquinone oxidoreductase	262000000	226000000	253000000	248000000	243000000	244000000	269000000	250000000	251000000	274000000	275000000	249000000		246000000	2.61333e+08	1.06233
P18930	NU3M_DROME	mt:ND3	NADH-ubiquinone oxidoreductase chain 3	305000000	190000000	290000000	248000000	248000000	192000000	209000000	229000000	201000000	180000000	210000000	212000000		245500000	2.06833e+08	0.842498
Q9V438	PDIA6_DROME	CaBP1	Protein disulfide-isomerase A6 homolog	235000000	218000000	240000000	248000000	263000000	258000000	237000000	265000000	248000000	246000000	282000000	255000000		2.43667e+08	255500000	1.04856
Q7K188	Q7K188_DROME	Dmel\CG6329	GEO05126p1	307000000	243000000	261000000	245000000	238000000	166000000	217000000	242000000	149000000	172000000	198000000	228000000		2.43333e+08	201000000	0.826027
O61604	O61604_DROME	Fim	Fimbrin	247000000	235000000	232000000	263000000	249000000	233000000	238000000	253000000	252000000	249000000	248000000	241000000		2.43167e+08	2.46833e+08	1.01508
Q8SYG3	Q8SYG3_DROME	BcDNA:RE63412	E2 ubiquitin-conjugating enzyme	229000000	264000000	240000000	238000000	250000000	235000000	187000000	184000000	191000000	186000000	175000000	189000000		2.42667e+08	1.85333e+08	0.763736
Q7KMP8	Q7KMP8_DROME	Rpn9	26S proteasome non-ATPase regulatory subunit 13	230000000	241000000	234000000	237000000	254000000	260000000	250000000	234000000	301000000	298000000	288000000	241000000		2.42667e+08	2.68667e+08	1.10714
Q9VR79	Q9VR79_DROME	obst-A	LD43683p	256000000	221000000	235000000	255000000	244000000	239000000	202000000	180000000	191000000	201000000	197000000	219000000		2.41667e+08	1.98333e+08	0.82069
P02518	HSP27_DROME	Hsp27	Heat shock protein 27	241000000	254000000	241000000	227000000	252000000	229000000	209000000	218000000	185000000	227000000	222000000	232000000		2.40667e+08	215500000	0.895429
O18333	RAB2_DROME	Rab2	Ras-related protein Rab-2	187000000	248000000	232000000	219000000	275000000	279000000	315000000	299000000	309000000	300000000	291000000	312000000		240000000	3.04333e+08	1.26806
Q05547	PP13_DROME	Pp1-13C	Serine/threonine-protein phosphatase alpha-3 isoform	258000000	240000000	225000000	259000000	236000000	219000000	256000000	257000000	277000000	284000000	281000000	253000000		239500000	268000000	1.119
P0DKM0	COA3_DROME	Ccdc56	Cytochrome c oxidase assembly factor 3, mitochondrial	242000000	236000000	223000000	255000000	243000000	237000000	278000000	251000000	288000000	277000000	303000000	299000000		2.39333e+08	2.82667e+08	1.18106
A1Z6P3	A1Z6P3_DROME	Eb1	Eb1, isoform F	282000000	236000000	226000000	230000000	234000000	219000000	246000000	230000000	241000000	234000000	223000000	237000000		2.37833e+08	2.35167e+08	0.988788
C0HK92-2	Y5076_DROME	CG45076	Isoform E of Uncharacterized protein CG45076	196000000	251000000	256000000	233000000	236000000	251000000	260000000	251000000	243000000	222000000	229000000	239000000		2.37167e+08	2.40667e+08	1.01476
Q9Y143	Q9Y143_DROME	Jhbp14	BcDNA.GH05536	202000000	204000000	255000000	271000000	284000000	207000000	257000000	225000000	229000000	277000000	290000000	230000000		2.37167e+08	2.51333e+08	1.05973
Q9W0C3	Q9W0C3_DROME	Dmel\CG13928	GH11843p	288000000	207000000	241000000	250000000	235000000	201000000	185000000	197000000	173000000	178000000	189000000	188000000		237000000	185000000	0.780591
Q7JRL9	Q7JRL9_DROME	CG7237	GH25289p	247000000	226000000	236000000	235000000	248000000	227000000	274000000	247000000	262000000	259000000	254000000	258000000		236500000	259000000	1.09514
Q8SZM2	Q8SZM2_DROME	Vajk2	RH04334p	251000000	220000000	203000000	231000000	270000000	243000000	280000000	259000000	277000000	284000000	243000000	248000000		2.36333e+08	2.65167e+08	1.122
Q8INW5;Q9I7M3;Q9VIW5	Q8INW5_DROME;Q9I7M3_DROME;Q9VIW5_DROME	Dmel\CG10237	MIP27352p	192000000	247000000	232000000	249000000	250000000	247000000	249000000	261000000	241000000	245000000	261000000	255000000		2.36167e+08	252000000	1.06704
A4V2A4	A4V2A4_DROME	mub	Mushroom-body expressed, isoform G	249000000	219000000	254000000	238000000	229000000	222000000	187000000	203000000	169000000	188000000	174000000	193000000		2.35167e+08	1.85667e+08	0.789511
Q7JVI6	Q7JVI6_DROME	GstE13	Glutathione S transferase E13, isoform A	233000000	230000000	218000000	234000000	244000000	251000000	241000000	247000000	232000000	248000000	236000000	249000000		235000000	2.42167e+08	1.0305
Q24319	OST48_DROME	Ost48	Dolichyl-diphosphooligosaccharide--protein glycosyltransferase 48 kDa subunit	251000000	212000000	233000000	241000000	249000000	223000000	214000000	232000000	222000000	224000000	223000000	225000000		2.34833e+08	2.23333e+08	0.951029
Q9VGP3	Q9VGP3_DROME	bumpel	FI02016p	235000000	257000000	229000000	232000000	238000000	214000000	223000000	209000000	229000000	239000000	235000000	265000000		2.34167e+08	2.33333e+08	0.996441
Q27597	NCPR_DROME	Cpr	NADPH--cytochrome P450 reductase	247000000	212000000	252000000	230000000	229000000	233000000	238000000	229000000	220000000	236000000	246000000	246000000		2.33833e+08	2.35833e+08	1.00855
Q9VK99	Q9VK99_DROME	atilla	Atilla, isoform B	274000000	215000000	217000000	236000000	243000000	213000000	213000000	195000000	193000000	209000000	219000000	214000000		233000000	2.07167e+08	0.889127
Q9XZJ4	PSA6_DROME	Prosalpha1	Proteasome subunit alpha type-6	233000000	243000000	224000000	230000000	240000000	226000000	224000000	214000000	219000000	229000000	208000000	230000000		2.32667e+08	2.20667e+08	0.948424
Q9W0M4	Q9W0M4_DROME	Dmel\CG13887	Endoplasmic reticulum transmembrane protein	228000000	228000000	217000000	248000000	239000000	234000000	198000000	213000000	211000000	203000000	202000000	200000000		2.32333e+08	204500000	0.880201
Q9VQE0	Q9VQE0_DROME	Drp1	Dynamin related protein 1, isoform A	252000000	226000000	239000000	233000000	225000000	213000000	231000000	237000000	229000000	227000000	232000000	237000000		2.31333e+08	2.32167e+08	1.0036
Q9VYD7	TIM9_DROME	Tim9a	Mitochondrial import inner membrane translocase subunit Tim9	232000000	234000000	246000000	236000000	236000000	203000000	226000000	232000000	215000000	213000000	213000000	239000000		2.31167e+08	223000000	0.964672
Q9VB46	APMAP_DROME	Hmu	Adipocyte plasma membrane-associated protein Hemomucin	239000000	214000000	237000000	239000000	233000000	220000000	226000000	227000000	198000000	227000000	233000000	206000000		2.30333e+08	219500000	0.952967
Q9VN93	CATF_DROME	CtsF	Cathepsin F	234000000	246000000	249000000	242000000	204000000	207000000	235000000	234000000	252000000	240000000	240000000	238000000		2.30333e+08	2.39833e+08	1.04124
Q23970	PBP6_DROME	Obp83b	Pheromone-binding protein-related protein 6	268000000	227000000	220000000	241000000	230000000	194000000	261000000	220000000	241000000	257000000	264000000	250000000		230000000	2.48833e+08	1.08188
Q7JZN0	Q7JZN0_DROME	Sec61beta	Protein transport protein Sec61 subunit beta	217000000	211000000	250000000	238000000	245000000	215000000	212000000	239000000	215000000	207000000	236000000	203000000		2.29333e+08	2.18667e+08	0.953488
C0HKA0;C0HKA1	RS14A_DROME;RS14B_DROME	RpS14a;RpS14b	Small ribosomal subunit protein uS11A	207000000	246000000	244000000	222000000	204000000	253000000	269000000	233000000	305000000	279000000	258000000	220000000		2.29333e+08	2.60667e+08	1.13663
Q9VDY8	Q9VDY8_DROME	vib	MIP08680p	211000000	224000000	234000000	221000000	236000000	240000000	250000000	250000000	248000000	246000000	254000000	246000000		2.27667e+08	249000000	1.0937
Q0E8S7	Q0E8S7_DROME	homer	Homer, isoform E	206000000	257000000	215000000	207000000	234000000	247000000	247000000	236000000	267000000	268000000	269000000	255000000		2.27667e+08	257000000	1.12884
Q9XZH6	VATG_DROME	Vha13	V-type proton ATPase subunit G	200000000	222000000	243000000	215000000	244000000	241000000	334000000	281000000	358000000	332000000	337000000	298000000		227500000	3.23333e+08	1.42125
Q9VFQ9	Q9VFQ9_DROME	Dip-B	Dipeptidase B, isoform A	234000000	222000000	226000000	254000000	212000000	216000000	209000000	203000000	203000000	195000000	212000000	199000000		2.27333e+08	203500000	0.895161
A0A0B4KEW2;A0A0B4KFE6;Q0E901	A0A0B4KEW2_DROME;A0A0B4KFE6_DROME;Q0E901_DROME	BcDNA:AT02070;Dmel\CG30389	Uncharacterized protein, isoform E	245000000	236000000	229000000	198000000	270000000	185000000	222000000	223000000	244000000	217000000	241000000	230000000		2.27167e+08	229500000	1.01027
Q8MMD2;Q8MMD3	Q8MMD2_DROME;Q8MMD3_DROME	Eps-15	Epidermal growth factor receptor pathway substrate clone 15, isoform B	207000000	229000000	219000000	236000000	240000000	231000000	249000000	260000000	266000000	260000000	262000000	266000000		227000000	260500000	1.14758
M9PBF6;Q1WWC9;Q9VIF7	M9PBF6_DROME;Q1WWC9_DROME;Q9VIF7_DROME	Dap160	Dynamin associated protein 160, isoform G	226000000	246000000	227000000	216000000	214000000	233000000	270000000	254000000	267000000	252000000	273000000	272000000		227000000	2.64667e+08	1.16593
P18431-1	SGG_DROME	sgg	Isoform SGG46 of Protein kinase shaggy	257000000	235000000	241000000	230000000	207000000	190000000	213000000	221000000	192000000	202000000	224000000	224000000		2.26667e+08	2.12667e+08	0.938235
M9NEW1	M9NEW1_DROME	Mlc-c	Myosin light chain cytoplasmic, isoform B	231000000	241000000	211000000	214000000	240000000	223000000	207000000	221000000	231000000	225000000	227000000	221000000		2.26667e+08	222000000	0.979412
O97479	O97479_DROME	Sodh1	Sorbitol dehydrogenase	275000000	202000000	246000000	229000000	200000000	205000000	101000000	117000000	96000000	111000000	107000000	97400000		2.26167e+08	104900000	0.463817
A0A0B4LGY0	A0A0B4LGY0_DROME	Unc-115a	Uncoordinated 115a, isoform H	247000000	233000000	225000000	232000000	213000000	206000000	225000000	225000000	220000000	211000000	226000000	215000000		226000000	2.20333e+08	0.974926
Q9VX36	Q9VX36_DROME	ND-24	NADH dehydrogenase (Ubiquinone) 24 kDa subunit, isoform A	239000000	233000000	230000000	224000000	204000000	225000000	239000000	224000000	224000000	229000000	247000000	229000000		2.25833e+08	232000000	1.02731
Q9W3J5	SYFA_DROME	alpha-PheRS	Phenylalanine--tRNA ligase alpha subunit	232000000	235000000	222000000	225000000	226000000	213000000	219000000	216000000	218000000	212000000	206000000	216000000		225500000	214500000	0.95122
Q7JVH6	Q7JVH6_DROME	Dmel\CG9436	LD24696p	223000000	231000000	228000000	217000000	221000000	231000000	226000000	243000000	234000000	224000000	233000000	206000000		2.25167e+08	2.27667e+08	1.0111
Q9V6U9	MECR_DROME	Mecr	Enoyl-[acyl-carrier-protein] reductase, mitochondrial	204000000	197000000	249000000	218000000	218000000	264000000	268000000	260000000	254000000	230000000	292000000	226000000		225000000	255000000	1.13333
Q9VZA4	BND7A_DROME	CG42540	Band 7 protein CG42540	215000000	219000000	215000000	228000000	238000000	233000000	257000000	242000000	274000000	250000000	263000000	275000000		2.24667e+08	2.60167e+08	1.15801
Q94521;Q94521-2	DNAT_DROME	speck	Arylalkylamine N-acetyltransferase 1	247000000	223000000	208000000	234000000	228000000	203000000	246000000	231000000	227000000	232000000	260000000	257000000		2.23833e+08	2.42167e+08	1.08191
Q23983	SNAP_DROME	alphaSnap	Alpha-soluble NSF attachment protein	251000000	219000000	225000000	222000000	223000000	195000000	229000000	230000000	208000000	220000000	218000000	234000000		222500000	2.23167e+08	1.003
Q9W0P5	GALE_DROME	Gale	UDP-glucose 4-epimerase	257000000	186000000	226000000	242000000	220000000	202000000	172000000	220000000	141000000	161000000	158000000	171000000		2.22167e+08	170500000	0.767442
Q9VTB4	Q9VTB4_DROME	ND-13B	NADH dehydrogenase (Ubiquinone) 13 kDa B subunit	216000000	271000000	218000000	204000000	221000000	203000000	217000000	211000000	258000000	258000000	237000000	242000000		2.22167e+08	2.37167e+08	1.06752
Q8MKJ5	Q8MKJ5_DROME	Dmel\CG30197	GEO08105p1	288000000	203000000	227000000	224000000	198000000	192000000	146000000	153000000	117000000	154000000	144000000	151000000		222000000	1.44167e+08	0.649399
P48605	TCPG_DROME	CCT3	T-complex protein 1 subunit gamma	242000000	210000000	224000000	218000000	216000000	216000000	205000000	215000000	195000000	202000000	200000000	207000000		221000000	204000000	0.923077
Q9W414	Q9W414_DROME	Rpt4	Regulatory particle triple-A ATPase 4	224000000	196000000	222000000	224000000	228000000	231000000	201000000	219000000	230000000	205000000	205000000	217000000		2.20833e+08	2.12833e+08	0.963774
Q9VB96	Q9VB96_DROME	Dmel\CG31075	Uncharacterized protein, isoform A	238000000	212000000	207000000	219000000	222000000	226000000	184000000	187000000	172000000	171000000	176000000	168000000		2.20667e+08	1.76333e+08	0.799094
Q9VFC8	GYS_DROME	Glys	Glycogen [starch] synthase	190000000	236000000	246000000	202000000	222000000	227000000	223000000	229000000	218000000	217000000	223000000	190000000		220500000	2.16667e+08	0.982615
Q9VI09	Q9VI09_DROME	Dmel\CG17919	GH14494p	247000000	224000000	218000000	219000000	199000000	214000000	207000000	191000000	206000000	212000000	175000000	199000000		2.20167e+08	1.98333e+08	0.900833
Q9VNA5	PSB4_DROME	Prosbeta7	Proteasome subunit beta type-4	192000000	280000000	195000000	191000000	214000000	247000000	284000000	237000000	277000000	278000000	246000000	245000000		2.19833e+08	2.61167e+08	1.18802
P06754-5	TPM1_DROME	Tm1	Isoform L of Tropomyosin-1, isoforms 9A/A/B	209000000	222000000	196000000	223000000	232000000	235000000	226000000	228000000	252000000	229000000	235000000	245000000		219500000	2.35833e+08	1.07441
A0A0B4KGI5;E1JIJ8	A0A0B4KGI5_DROME;E1JIJ8_DROME	Ace	Carboxylic ester hydrolase	198000000	227000000	225000000	240000000	212000000	215000000	236000000	223000000	258000000	240000000	251000000	243000000		219500000	2.41833e+08	1.10175
P36241	RL19_DROME	RpL19	Large ribosomal subunit protein eL19	165000000	217000000	251000000	201000000	247000000	235000000	208000000	219000000	196000000	215000000	205000000	214000000		2.19333e+08	209500000	0.955167
Q9VP53	Q9VP53_DROME	Cpr78Cc	Cuticular protein 78Cc	220000000	165000000	176000000	241000000	244000000	270000000	299000000	218000000	323000000	374000000	253000000	317000000		2.19333e+08	2.97333e+08	1.35562
A1Z8N1-2	TRE11_DROME	Tret1-1	Isoform B of Facilitated trehalose transporter Tret1-1	250000000	244000000	256000000	208000000	160000000	196000000	231000000	242000000	174000000	165000000	188000000	165000000		219000000	1.94167e+08	0.886606
A0A0B4LHC9;Q9W1I7	A0A0B4LHC9_DROME;Q9W1I7_DROME	Dmel\CG5554	Uncharacterized protein, isoform B	219000000	205000000	238000000	213000000	229000000	207000000	232000000	208000000	238000000	181000000	236000000	253000000		218500000	2.24667e+08	1.02822
P15215	LAMC1_DROME	LanB2	Laminin subunit gamma-1	217000000	202000000	210000000	229000000	225000000	227000000	206000000	209000000	200000000	212000000	201000000	216000000		2.18333e+08	2.07333e+08	0.949618
Q9VLG9	Q9VLG9_DROME	Argl	Argininosuccinate lyase, isoform B	252000000	202000000	239000000	200000000	209000000	205000000	134000000	163000000	150000000	142000000	155000000	131000000		2.17833e+08	1.45833e+08	0.669472
M9MRX4	M9MRX4_DROME	Ank2	Ankyrin 2, isoform U	212000000	212000000	217000000	220000000	223000000	222000000	236000000	232000000	246000000	238000000	243000000	243000000		2.17667e+08	2.39667e+08	1.10107
E1JI40;Q9VW31	E1JI40_DROME;Q9VW31_DROME	verm	Vermiform, isoform I	258000000	197000000	222000000	207000000	215000000	204000000	196000000	200000000	185000000	215000000	183000000	191000000		2.17167e+08	195000000	0.897928
O16158	O16158_DROME	Scp2	Calcium-binding protein	194000000	228000000	219000000	204000000	237000000	220000000	194000000	203000000	188000000	209000000	197000000	235000000		217000000	2.04333e+08	0.941628
A1ZAU4;Q7K5N8	A1ZAU4_DROME;Q7K5N8_DROME	CtsK2	RH39096p	224000000	223000000	209000000	204000000	223000000	218000000	163000000	168000000	166000000	164000000	162000000	164000000		2.16833e+08	164500000	0.758647
Q9VVW3	SFXN2_DROME	Sfxn2	Sideroflexin-2	216000000	215000000	235000000	225000000	207000000	202000000	194000000	201000000	213000000	203000000	212000000	209000000		2.16667e+08	2.05333e+08	0.947692
Q9VE75	Q9VE75_DROME	Vha100-2	V-type proton ATPase subunit a	197000000	227000000	215000000	225000000	206000000	230000000	246000000	215000000	235000000	237000000	236000000	249000000		2.16667e+08	2.36333e+08	1.09077
Q5U126	Q5U126_DROME	CG7072	GEO11286p1	229000000	171000000	221000000	216000000	238000000	222000000	260000000	194000000	264000000	269000000	230000000	235000000		2.16167e+08	242000000	1.11951
A0A6F7R657	A0A6F7R657_DROME	wdb	Widerborst, isoform H	217000000	212000000	217000000	220000000	223000000	206000000	207000000	192000000	200000000	203000000	212000000	206000000		2.15833e+08	2.03333e+08	0.942085
Q9VK00	Q9VK00_DROME	Dmel\CG16826	Uncharacterized protein, isoform A	211000000	208000000	205000000	251000000	235000000	182000000	116000000	149000000	189000000	136000000	104000000	198000000		2.15333e+08	1.48667e+08	0.690402
P40304	PSB1_DROME	Prosbeta6	Proteasome subunit beta type-1	208000000	255000000	206000000	202000000	208000000	211000000	218000000	213000000	210000000	226000000	204000000	208000000		215000000	2.13167e+08	0.991473
Q9VW54	Q9VW54_DROME	Rpn1	26S proteasome non-ATPase regulatory subunit 2	209000000	219000000	219000000	220000000	201000000	217000000	219000000	220000000	214000000	212000000	226000000	204000000		2.14167e+08	2.15833e+08	1.00778
Q7K511	Q7K511_DROME	D2hgdh	D-2-hydroxyglutarate dehydrogenase, mitochondrial	245000000	201000000	220000000	212000000	197000000	207000000	166000000	179000000	172000000	169000000	173000000	155000000		2.13667e+08	169000000	0.790952
Q9V3W7	Q9V3W7_DROME	SF2	LD40489p	222000000	198000000	209000000	215000000	226000000	211000000	211000000	213000000	205000000	193000000	197000000	220000000		213500000	206500000	0.967213
Q9VXZ0	Q9VXZ0_DROME	ND-B18	NADH dehydrogenase [ubiquinone] 1 beta subcomplex subunit 7	244000000	188000000	243000000	235000000	214000000	156000000	190000000	179000000	165000000	176000000	184000000	184000000		2.13333e+08	1.79667e+08	0.842187
P55162	HEM_DROME	Hem	Membrane-associated protein Hem	204000000	216000000	218000000	219000000	211000000	212000000	236000000	241000000	239000000	233000000	228000000	242000000		2.13333e+08	236500000	1.10859
Q9V8M5	3HIDH_DROME	CG15093	Probable 3-hydroxyisobutyrate dehydrogenase, mitochondrial	250000000	177000000	206000000	216000000	214000000	214000000	113000000	123000000	102000000	122000000	124000000	124000000		2.12833e+08	118000000	0.554424
P06754-3	TPM1_DROME	Tm1	Isoform 9A of Tropomyosin-1, isoforms 9A/A/B	186000000	215000000	211000000	218000000	224000000	223000000	297000000	241000000	285000000	299000000	276000000	236000000		2.12833e+08	2.72333e+08	1.27956
Q9VK12	Q9VK12_DROME	Jhbp13	GH20621p	198000000	205000000	209000000	214000000	223000000	227000000	235000000	205000000	231000000	217000000	237000000	241000000		2.12667e+08	2.27667e+08	1.07053
P31007	DLG1_DROME	dlg1	Disks large 1 tumor suppressor protein	210000000	225000000	203000000	211000000	216000000	209000000	244000000	239000000	243000000	246000000	241000000	240000000		2.12333e+08	2.42167e+08	1.1405
Q9VDH3	Q9VDH3_DROME	Ktl	GH08630p	207000000	212000000	216000000	213000000	204000000	219000000	288000000	230000000	324000000	311000000	296000000	263000000		2.11833e+08	2.85333e+08	1.34697
Q24046	ATPB1_DROME	nrv1	Sodium/potassium-transporting ATPase subunit beta-1	233000000	210000000	201000000	219000000	200000000	207000000	228000000	214000000	235000000	237000000	237000000	209000000		2.11667e+08	2.26667e+08	1.07087
Q9Y0Y2	PURA_DROME	Adss	Adenylosuccinate synthetase	217000000	205000000	214000000	211000000	216000000	205000000	189000000	214000000	192000000	191000000	185000000	206000000		2.11333e+08	1.96167e+08	0.928233
Q8SYQ4	Q8SYQ4_DROME	BcDNA:RE42475	RE42475p	224000000	186000000	214000000	216000000	236000000	189000000	181000000	187000000	145000000	167000000	180000000	179000000		2.10833e+08	1.73167e+08	0.821344
Q9VVH3	MIC13_DROME	QIL1	MICOS complex subunit MIC13 homolog QIL1	158000000	221000000	224000000	212000000	214000000	235000000	254000000	243000000	241000000	229000000	250000000	245000000		2.10667e+08	2.43667e+08	1.15665
P35128	UBE2N_DROME	ben	Ubiquitin-conjugating enzyme E2 N	226000000	198000000	224000000	215000000	207000000	193000000	218000000	199000000	206000000	210000000	207000000	223000000		210500000	210500000	1
Q8SYD9	Q8SYD9_DROME	EndoB	Endophilin B, isoform A	212000000	201000000	213000000	214000000	212000000	208000000	237000000	222000000	225000000	229000000	228000000	239000000		210000000	230000000	1.09524
P48601	PRS4_DROME	Rpt2	26S proteasome regulatory subunit 4	225000000	196000000	197000000	203000000	215000000	221000000	199000000	205000000	211000000	201000000	200000000	204000000		209500000	2.03333e+08	0.970565
P35122	UCHL_DROME	Uch	Ubiquitin carboxyl-terminal hydrolase	186000000	214000000	222000000	208000000	199000000	226000000	272000000	236000000	276000000	274000000	292000000	252000000		2.09167e+08	267000000	1.27649
Q9W330	Q9W330_DROME	Hex-A	Phosphotransferase	203000000	211000000	202000000	214000000	208000000	216000000	217000000	217000000	206000000	227000000	220000000	216000000		209000000	2.17167e+08	1.03907
Q9W3N9	Q9W3N9_DROME	Acat1	LD24105p	191000000	196000000	218000000	195000000	222000000	231000000	204000000	213000000	203000000	202000000	211000000	214000000		2.08833e+08	2.07833e+08	0.995211
P48604	GRPE_DROME	Roe1	GrpE protein homolog, mitochondrial	227000000	204000000	202000000	205000000	204000000	203000000	185000000	201000000	196000000	195000000	190000000	200000000		207500000	194500000	0.937349
A0A0B4KEU8;A1ZBK3	A0A0B4KEU8_DROME;A1ZBK3_DROME	Dmel\CG10062	Uncharacterized protein, isoform C	202000000	222000000	206000000	175000000	212000000	226000000	209000000	219000000	201000000	204000000	191000000	224000000		2.07167e+08	208000000	1.00402
Q8SXQ1	Q8SXQ1_DROME	Aldh7A1	aldehyde dehydrogenase (NAD(+))	213000000	195000000	227000000	194000000	196000000	214000000	189000000	184000000	191000000	188000000	193000000	164000000		206500000	1.84833e+08	0.895077
P37236	FRQ1_DROME	Frq1	Frequenin-1	200000000	203000000	197000000	203000000	224000000	210000000	246000000	229000000	256000000	237000000	241000000	273000000		2.06167e+08	247000000	1.19806
Q9VN13	SFXN1_DROME	Sfxn1-3	Sideroflexin-1-3	213000000	204000000	214000000	199000000	180000000	225000000	217000000	204000000	215000000	202000000	205000000	176000000		2.05833e+08	2.03167e+08	0.987045
Q9V447	KRH2_DROME	Kr-h2	Krueppel homolog 2	192000000	215000000	222000000	226000000	178000000	202000000	239000000	243000000	194000000	205000000	223000000	213000000		2.05833e+08	219500000	1.0664
Q7K148	Q7K148_DROME	Prosbeta5	Proteasome subunit beta	187000000	211000000	199000000	199000000	212000000	225000000	197000000	179000000	193000000	199000000	185000000	201000000		205500000	1.92333e+08	0.935929
Q9VVT6	Q9VVT6_DROME	Grx1	GEO08966p1	205000000	175000000	228000000	203000000	238000000	181000000	180000000	257000000	200000000	190000000	231000000	205000000		205000000	210500000	1.02683
O18334	RAB6_DROME	Rab6	Ras-related protein Rab6	204000000	183000000	198000000	219000000	215000000	208000000	227000000	220000000	213000000	210000000	244000000	231000000		204500000	2.24167e+08	1.09617
Q9VQL1	Q9VQL1_DROME	SerRS	serine--tRNA ligase	203000000	211000000	200000000	201000000	198000000	211000000	212000000	199000000	216000000	215000000	204000000	198000000		204000000	2.07333e+08	1.01634
P54385-2	DHE3_DROME	Gdh	Isoform C of Glutamate dehydrogenase, mitochondrial	164000000	274000000	212000000	178000000	143000000	247000000	319000000	254000000	418000000	370000000	344000000	284000000		203000000	331500000	1.633
Q9VKW1	Q9VKW1_DROME	Wdfy2	LD41958p	208000000	199000000	203000000	208000000	201000000	198000000	200000000	221000000	211000000	211000000	196000000	205000000		2.02833e+08	2.07333e+08	1.02219
Q6NN28	Q6NN28_DROME	Tm1	RE21974p	203000000	212000000	199000000	201000000	195000000	205000000	210000000	209000000	219000000	216000000	231000000	233000000		202500000	2.19667e+08	1.08477
Q9Y141	Q9Y141_DROME	GH05741	Carboxylic ester hydrolase	176000000	184000000	183000000	173000000	287000000	210000000	277000000	272000000	196000000	193000000	204000000	198000000		2.02167e+08	2.23333e+08	1.1047
Q9VPX5	Q9VPX5_DROME	Vps29	Vacuolar protein sorting-associated protein 29	203000000	206000000	202000000	215000000	191000000	195000000	205000000	208000000	213000000	224000000	227000000	225000000		202000000	217000000	1.07426
P08646	RAS1_DROME	Ras85D	Ras-like protein 1	185000000	223000000	203000000	192000000	198000000	209000000	219000000	221000000	216000000	217000000	222000000	238000000		2.01667e+08	2.22167e+08	1.10165
Q9VVA4	Q9VVA4_DROME	GS	glutamate synthase (NADH)	173000000	180000000	200000000	218000000	205000000	225000000	214000000	235000000	216000000	246000000	224000000	237000000		2.00167e+08	2.28667e+08	1.14238
Q9VSR5	Q9VSR5_DROME	mRpL12	GM03767p	183000000	208000000	204000000	178000000	197000000	227000000	232000000	211000000	231000000	226000000	226000000	221000000		199500000	224500000	1.12531
Q7KRU8	FRIH_DROME	Fer1HCH	Ferritin heavy chain	267000000	220000000	161000000	231000000	179000000	135000000	139000000	174000000	147000000	146000000	110000000	130000000		1.98833e+08	141000000	0.709137
A1Z6Z4;A0A0B4KF99;A0A0C4DHC8;A0A0B4KEL0;A1Z6Z3	A0A0B4KEL0_DROME;A0A0B4KF99_DROME;A0A0C4DHC8_DROME;A1Z6Z3_DROME;A1Z6Z4_DROME	Aldh-III	Aldehyde dehydrogenase	192000000	187000000	202000000	215000000	208000000	188000000	216000000	209000000	213000000	217000000	217000000	212000000		1.98667e+08	214000000	1.07718
Q27580	SAHH_DROME	Ahcy	Adenosylhomocysteinase	189000000	202000000	202000000	211000000	192000000	194000000	155000000	161000000	168000000	166000000	164000000	159000000		1.98333e+08	1.62167e+08	0.817647
Q9U915	KAD2_DROME	Adk2	Adenylate kinase	201000000	191000000	196000000	193000000	190000000	219000000	191000000	192000000	204000000	201000000	201000000	191000000		1.98333e+08	1.96667e+08	0.991597
P42325	NCAH_DROME	Nca	Neurocalcin homolog	208000000	190000000	195000000	205000000	203000000	186000000	197000000	203000000	192000000	194000000	193000000	201000000		1.97833e+08	1.96667e+08	0.994103
Q9VDP9	Q9VDP9_DROME	Dmel\CG4390	S-formylglutathione hydrolase	202000000	187000000	186000000	192000000	196000000	224000000	198000000	191000000	205000000	201000000	198000000	189000000		1.97833e+08	197000000	0.995788
P27716	INX1_DROME	ogre	Innexin inx1	202000000	209000000	235000000	215000000	155000000	167000000	180000000	201000000	173000000	174000000	188000000	172000000		1.97167e+08	1.81333e+08	0.919696
Q9VJ86	Q9VJ86_DROME	bsf	Bicoid stability factor	210000000	196000000	190000000	192000000	191000000	203000000	188000000	182000000	191000000	194000000	185000000	181000000		197000000	1.86833e+08	0.948393
A0A0B4KHT5	A0A0B4KHT5_DROME	Syp	Syncrip, isoform J	207000000	196000000	200000000	200000000	186000000	193000000	205000000	178000000	221000000	218000000	210000000	195000000		197000000	204500000	1.03807
O46036-2	CTBP_DROME	CtBP	Isoform A of C-terminal-binding protein	215000000	178000000	197000000	203000000	206000000	181000000	181000000	180000000	184000000	194000000	189000000	207000000		1.96667e+08	1.89167e+08	0.961864
O61231	RL10_DROME	RpL10	Large ribosomal subunit protein uL16	177000000	253000000	218000000	145000000	170000000	216000000	192000000	158000000	199000000	229000000	217000000	156000000		196500000	1.91833e+08	0.976251
P25161	PSMD3_DROME	Rpn3	Probable 26S proteasome non-ATPase regulatory subunit 3	190000000	203000000	203000000	191000000	186000000	205000000	210000000	206000000	219000000	215000000	215000000	205000000		1.96333e+08	2.11667e+08	1.0781
Q9V470	Q9V470_DROME	ScsbetaG	Succinate--CoA ligase [GDP-forming] subunit beta, mitochondrial	197000000	191000000	205000000	184000000	202000000	197000000	198000000	218000000	217000000	194000000	203000000	195000000		196000000	2.04167e+08	1.04167
P91938-2	TRXR1_DROME	Trxr1	Isoform A of Thioredoxin reductase 1, mitochondrial	174000000	229000000	182000000	214000000	187000000	190000000	215000000	206000000	194000000	237000000	196000000	236000000		196000000	214000000	1.09184
Q960W6	FACR3_DROME	CG8306	Putative fatty acyl-CoA reductase CG8306	195000000	170000000	191000000	245000000	205000000	166000000	171000000	187000000	161000000	142000000	157000000	176000000		1.95333e+08	1.65667e+08	0.848123
Q9VNF3	Q9VNF3_DROME	Dmel\CG12171	RE01652p	193000000	192000000	215000000	194000000	178000000	195000000	184000000	188000000	188000000	191000000	183000000	176000000		194500000	185000000	0.951157
Q9V436	Q9V436_DROME	Rpn12	26S proteasome non-ATPase regulatory subunit 8	191000000	180000000	196000000	193000000	206000000	201000000	177000000	196000000	184000000	192000000	179000000	185000000		194500000	185500000	0.953728
O76206	RIFK_DROME	Rfk	Putative riboflavin kinase	214000000	181000000	178000000	196000000	207000000	190000000	133000000	135000000	156000000	160000000	177000000	159000000		1.94333e+08	1.53333e+08	0.789022
Q24372	LACH_DROME	Lac	Lachesin	217000000	183000000	189000000	210000000	205000000	162000000	158000000	177000000	160000000	177000000	160000000	183000000		1.94333e+08	1.69167e+08	0.870497
P12613	TCPA_DROME	CCT1	T-complex protein 1 subunit alpha	202000000	179000000	203000000	202000000	196000000	184000000	160000000	182000000	170000000	176000000	170000000	171000000		1.94333e+08	171500000	0.882504
Q9V4C1	Q9V4C1_DROME	Dmel\CG1674	Uncharacterized protein, isoform E	187000000	190000000	201000000	188000000	190000000	208000000	197000000	186000000	190000000	191000000	197000000	202000000		194000000	1.93833e+08	0.999141
Q9VN50	EI3F1_DROME	eIF3f1	Eukaryotic translation initiation factor 3 subunit F-1	202000000	182000000	208000000	199000000	192000000	181000000	212000000	205000000	236000000	196000000	249000000	224000000		194000000	2.20333e+08	1.13574
Q86PF4;Q9VG23	Q86PF4_DROME;Q9VG23_DROME	CT28495;Dmel\CG10126	GH08978p	194000000	198000000	187000000	197000000	179000000	207000000	219000000	193000000	248000000	238000000	227000000	217000000		1.93667e+08	2.23667e+08	1.15491
Q9V3P6	PSMD1_DROME	Rpn2	26S proteasome non-ATPase regulatory subunit 1	175000000	174000000	203000000	205000000	212000000	192000000	202000000	197000000	189000000	194000000	203000000	171000000		193500000	1.92667e+08	0.995693
Q7KML2	ACOX1_DROME	Acox1	Acyl-coenzyme A oxidase 1	169000000	263000000	197000000	181000000	176000000	172000000	231000000	269000000	169000000	171000000	174000000	171000000		193000000	197500000	1.02332
Q7K8X7	Q7K8X7_DROME	GstE9	Glutathione S transferase E9	185000000	186000000	192000000	199000000	193000000	203000000	219000000	229000000	221000000	210000000	201000000	191000000		193000000	2.11833e+08	1.09758
Q7KMQ0	Q7KMQ0_DROME	Rpt1	26S proteasome regulatory subunit 7	202000000	194000000	193000000	186000000	181000000	199000000	213000000	196000000	205000000	211000000	202000000	199000000		192500000	2.04333e+08	1.06147
P13469	MODU_DROME	mod	DNA-binding protein modulo	201000000	185000000	195000000	198000000	187000000	188000000	153000000	172000000	179000000	172000000	166000000	155000000		1.92333e+08	1.66167e+08	0.863951
P48994	TRPL_DROME	trpl	Transient-receptor-potential-like protein	209000000	205000000	184000000	193000000	199000000	164000000	165000000	146000000	179000000	170000000	217000000	180000000		1.92333e+08	1.76167e+08	0.915945
O76742	RAB7_DROME	Rab7	Ras-related protein Rab7	197000000	183000000	190000000	201000000	192000000	185000000	188000000	194000000	201000000	202000000	204000000	185000000		1.91333e+08	1.95667e+08	1.02265
Q9V3P3	Q9V3P3_DROME	REG	LD45860p	187000000	177000000	181000000	196000000	198000000	207000000	172000000	183000000	181000000	172000000	185000000	162000000		191000000	1.75833e+08	0.920593
P25867	UBCD1_DROME	eff	Ubiquitin-conjugating enzyme E2-17 kDa	148000000	192000000	219000000	178000000	200000000	207000000	222000000	213000000	203000000	235000000	209000000	237000000		1.90667e+08	2.19833e+08	1.15297
P48461	PP11_DROME	Pp1alpha-96A	Serine/threonine-protein phosphatase alpha-1 isoform	206000000	194000000	184000000	189000000	188000000	180000000	178000000	183000000	180000000	170000000	174000000	181000000		1.90167e+08	1.77667e+08	0.934268
Q9VJD4	Q9VJD4_DROME	Sgt	LD24721p	199000000	176000000	187000000	201000000	189000000	186000000	176000000	189000000	171000000	201000000	179000000	188000000		1.89667e+08	184000000	0.970123
O46037	VINC_DROME	Vinc	Vinculin	191000000	188000000	183000000	186000000	197000000	192000000	184000000	182000000	191000000	194000000	185000000	200000000		189500000	1.89333e+08	0.99912
Q9VSY4	ATAT1_DROME	Atat	Alpha-tubulin N-acetyltransferase 1	185000000	186000000	187000000	197000000	188000000	193000000	179000000	174000000	184000000	193000000	175000000	189000000		1.89333e+08	1.82333e+08	0.963028
M9PD88;Q95RR1	M9PD88_DROME;Q95RR1_DROME	Atox1	Copper transport protein ATOX1	198000000	170000000	186000000	188000000	204000000	190000000	204000000	192000000	194000000	188000000	193000000	199000000		1.89333e+08	195000000	1.02993
Q9V3E7	Q9V3E7_DROME	Ref1	LD24793p	183000000	171000000	201000000	201000000	203000000	174000000	175000000	174000000	161000000	160000000	164000000	183000000		1.88833e+08	169500000	0.897617
Q9U4L6	TO401_DROME	Tom40	Mitochondrial import receptor subunit TOM40 homolog 1	180000000	181000000	190000000	181000000	193000000	195000000	175000000	191000000	187000000	180000000	191000000	184000000		1.86667e+08	1.84667e+08	0.989286
Q9VDI1;A0A0B4KH28	A0A0B4KH28_DROME;Q9VDI1_DROME	Synd	Syndapin, isoform C	188000000	185000000	201000000	180000000	187000000	177000000	180000000	194000000	176000000	176000000	182000000	179000000		1.86333e+08	1.81167e+08	0.972272
A1Z6G4	A1Z6G4_DROME	Dmel\CG17508	RE41154p1	177000000	185000000	188000000	194000000	166000000	207000000	200000000	233000000	201000000	181000000	218000000	201000000		1.86167e+08	2.05667e+08	1.10474
P35416	MYSP2_DROME	Prm	Paramyosin, short form	156000000	201000000	195000000	178000000	178000000	209000000	235000000	173000000	250000000	217000000	220000000	227000000		1.86167e+08	2.20333e+08	1.18353
A0A0B4KG47;A0A0B4KGT8;A0A0B4KHN1;Q7KSF4	A0A0B4KG47_DROME;A0A0B4KGT8_DROME;A0A0B4KHN1_DROME;Q7KSF4_DROME	cher	Cheerio, isoform P	190000000	190000000	179000000	182000000	183000000	189000000	197000000	183000000	191000000	193000000	190000000	193000000		185500000	1.91167e+08	1.03055
Q9W0B8	Q9W0B8_DROME	alphaCOP	Coatomer subunit alpha	185000000	176000000	183000000	193000000	188000000	184000000	183000000	185000000	166000000	180000000	179000000	172000000		1.84833e+08	177500000	0.960325
X2J516	X2J516_DROME	Gart	Trifunctional purine biosynthetic protein adenosine-3	202000000	188000000	194000000	166000000	169000000	188000000	156000000	166000000	154000000	160000000	162000000	144000000		184500000	157000000	0.850949
Q9VN44	Q9VN44_DROME	Karybeta3	FI07923p	191000000	175000000	199000000	186000000	181000000	175000000	198000000	212000000	210000000	217000000	209000000	195000000		184500000	2.06833e+08	1.12105
Q7KMM4	Q7KMM4_DROME	GCS2alpha	Glucosidase II subunit alpha	179000000	197000000	181000000	192000000	182000000	172000000	177000000	156000000	178000000	170000000	169000000	174000000		1.83833e+08	1.70667e+08	0.928377
Q9V3D4	IDGF2_DROME	Idgf2	Chitinase-like protein Idgf2	223000000	206000000	160000000	161000000	181000000	170000000	166000000	175000000	165000000	160000000	145000000	165000000		183500000	1.62667e+08	0.886467
O61491	FLOT1_DROME	Flo1	Flotillin-1	177000000	187000000	184000000	191000000	180000000	182000000	187000000	168000000	216000000	199000000	192000000	187000000		183500000	191500000	1.0436
Q8SWU7	OLA1_DROME	CG1354	Obg-like ATPase 1	198000000	177000000	182000000	191000000	182000000	167000000	187000000	191000000	192000000	192000000	199000000	184000000		1.82833e+08	1.90833e+08	1.04376
Q7KKI0	Q7KKI0_DROME	CCT5	T-complex protein 1 subunit epsilon	182000000	177000000	193000000	201000000	173000000	169000000	181000000	170000000	173000000	190000000	189000000	189000000		182500000	182000000	0.99726
Q9V405	Q9V405_DROME	Rpt3	26S proteasome regulatory complex subunit p48A	173000000	181000000	182000000	188000000	179000000	191000000	204000000	171000000	192000000	199000000	190000000	185000000		1.82333e+08	1.90167e+08	1.04296
O18413	PRS8_DROME	Rpt6	26S proteasome regulatory subunit 8	194000000	179000000	181000000	187000000	181000000	171000000	165000000	182000000	180000000	186000000	160000000	181000000		1.82167e+08	1.75667e+08	0.964318
A1Z9J3	A1Z9J3_DROME	shot	Short stop, isoform H	177000000	179000000	174000000	178000000	186000000	199000000	175000000	170000000	180000000	186000000	178000000	182000000		1.82167e+08	178500000	0.979872
Q07171;Q07171-6	GELS_DROME	Gel	Gelsolin	179000000	229000000	151000000	179000000	192000000	159000000	137000000	160000000	145000000	142000000	117000000	129000000		181500000	1.38333e+08	0.762167
Q9VZR2	Q9VZR2_DROME	Drsl5	Drosomycin-like 5	162000000	186000000	205000000	179000000	204000000	153000000	239000000	198000000	145000000	148000000	180000000	192000000		181500000	1.83667e+08	1.01194
Q8IN43	TOTC_DROME	TotC	Protein Turandot C	219000000	140000000	158000000	166000000	153000000	252000000	137000000	209000000	307000000	118000000	171000000	125000000		1.81333e+08	1.77833e+08	0.980699
A8JV22;X2JEJ0	A8JV22_DROME;X2JEJ0_DROME	Dmel\CG1440	Bleomycin hydrolase	187000000	188000000	177000000	175000000	177000000	183000000	191000000	192000000	182000000	197000000	190000000	186000000		1.81167e+08	1.89667e+08	1.04692
Q7K4Y0	Q7K4Y0_DROME	Desat1	Desaturase 1, isoform A	180000000	173000000	225000000	179000000	168000000	162000000	220000000	205000000	207000000	207000000	205000000	174000000		1.81167e+08	203000000	1.12052
Q9VQB4	Q9VQB4_DROME	Dmel\CG3609	Trans-1,2-dihydrobenzene-1,2-diol dehydrogenase	165000000	159000000	206000000	201000000	190000000	164000000	177000000	169000000	195000000	165000000	172000000	190000000		1.80833e+08	178000000	0.984332
X2JAU8-2;X2JAU8-5	NWK_DROME	nwk	Isoform 2 of Protein nervous wreck	180000000	188000000	179000000	175000000	170000000	186000000	210000000	201000000	214000000	207000000	204000000	205000000		1.79667e+08	2.06833e+08	1.15121
Q9VIH9	BERO2_DROME	CG9338	UPAR/Ly6 domain-containing protein CG9338	212000000	160000000	171000000	205000000	179000000	150000000	134000000	145000000	125000000	139000000	139000000	139000000		179500000	1.36833e+08	0.762303
M9PD73;M9PDF6;M9PDR0;Q9VIT9	M9PD73_DROME;M9PDF6_DROME;M9PDR0_DROME;Q9VIT9_DROME	Tep4	Thioester-containing protein 4, isoform B	174000000	208000000	166000000	172000000	183000000	173000000	150000000	149000000	149000000	154000000	143000000	153000000		1.79333e+08	1.49667e+08	0.834572
Q9VYV3	TXND5_DROME	prtp	Thioredoxin domain-containing protein 5 homolog	168000000	173000000	186000000	182000000	178000000	189000000	160000000	169000000	170000000	167000000	169000000	160000000		1.79333e+08	1.65833e+08	0.924721
Q9VWP2	Q9VWP2_DROME	Dmel\CG7322	RH57257p	205000000	175000000	194000000	174000000	168000000	158000000	154000000	142000000	131000000	144000000	149000000	115000000		179000000	1.39167e+08	0.777467
A1ZBU8	A1ZBU8_DROME	Bbd	Uncharacterized protein, isoform A	154000000	162000000	160000000	159000000	293000000	146000000	302000000	188000000	160000000	124000000	187000000	216000000		179000000	1.96167e+08	1.0959
Q9VHL2	Q9VHL2_DROME	CCT7	T-complex protein 1 subunit eta	197000000	167000000	170000000	172000000	180000000	186000000	157000000	161000000	165000000	163000000	154000000	155000000		1.78667e+08	1.59167e+08	0.890858
P45889	ACTZ_DROME	Arp1	Actin-related protein 1	162000000	180000000	181000000	174000000	181000000	193000000	207000000	204000000	216000000	216000000	209000000	208000000		178500000	210000000	1.17647
Q7JR71	SODE_DROME	Sod3	Extracellular superoxide dismutase [Cu-Zn]	212000000	169000000	168000000	174000000	177000000	170000000	132000000	119000000	130000000	116000000	131000000	136000000		1.78333e+08	1.27333e+08	0.714019
Q7K3J0	Q7K3J0_DROME	CCT8	T-complex protein 1 subunit theta	190000000	162000000	188000000	182000000	180000000	167000000	160000000	174000000	166000000	162000000	164000000	163000000		1.78167e+08	1.64833e+08	0.925164
Q9W592	Q9W592_DROME	Lrpprc2	EG:BACN32G11.3 protein	176000000	180000000	189000000	174000000	177000000	172000000	165000000	184000000	163000000	172000000	172000000	166000000		178000000	1.70333e+08	0.956929
Q9VE80;Q8T0J5	Q8T0J5_DROME;Q9VE80_DROME	Dmel\CG7675	GH26851p	168000000	187000000	170000000	187000000	178000000	176000000	205000000	195000000	190000000	190000000	194000000	198000000		1.77667e+08	1.95333e+08	1.09944
A1ZB64	BOM06_DROME	BomS6	Bomanin Short 6	243000000	177000000	149000000	167000000	200000000	126000000	155000000	146000000	132000000	189000000	109000000	156000000		177000000	1.47833e+08	0.835217
O17452	O17452_DROME	Peritrophin-A	LD20793p	186000000	163000000	164000000	193000000	185000000	168000000	207000000	188000000	194000000	212000000	194000000	190000000		176500000	197500000	1.11898
Q9VXQ3	Q9VXQ3_DROME	Mvd	Diphosphomevalonate decarboxylase	201000000	181000000	151000000	191000000	182000000	152000000	194000000	190000000	196000000	211000000	181000000	215000000		1.76333e+08	1.97833e+08	1.12193
P05130-2	KPC1_DROME	Pkc53E	Isoform Short of Protein kinase C, brain isozyme	171000000	182000000	180000000	179000000	179000000	164000000	182000000	183000000	163000000	167000000	178000000	182000000		1.75833e+08	1.75833e+08	1
A1Z8Z7	A1Z8Z7_DROME	Cpr49Ah	Cuticular protein 49Ah	181000000	158000000	172000000	172000000	175000000	195000000	162000000	143000000	172000000	175000000	145000000	168000000		175500000	1.60833e+08	0.916429
Q9W555;Q7K7G0	Q7K7G0_DROME;Q9W555_DROME	deltaCOP	Coatomer subunit delta	175000000	161000000	172000000	176000000	184000000	185000000	165000000	178000000	158000000	167000000	169000000	167000000		175500000	1.67333e+08	0.953466
Q95RA9	GILT1_DROME	GILT1	GILT-like protein 1	175000000	172000000	176000000	170000000	179000000	180000000	185000000	194000000	187000000	198000000	186000000	203000000		1.75333e+08	1.92167e+08	1.09601
A0A0B4LGP3;Q7KVF1;Q9W0X0	A0A0B4LGP3_DROME;Q7KVF1_DROME;Q9W0X0_DROME	emp	Epithelial membrane protein, isoform E	180000000	171000000	173000000	189000000	178000000	158000000	153000000	159000000	157000000	156000000	156000000	171000000		1.74833e+08	1.58667e+08	0.907531
Q9VTY2	Q9VTY2_DROME	anon-WO0172774.89	Uncharacterized protein, isoform A	189000000	180000000	168000000	168000000	177000000	167000000	165000000	162000000	154000000	163000000	164000000	174000000		1.74833e+08	1.63667e+08	0.93613
Q9Y166	Q9Y166_DROME	Dic1	BcDNA.GH02431	175000000	165000000	186000000	177000000	160000000	180000000	146000000	158000000	140000000	130000000	155000000	137000000		1.73833e+08	1.44333e+08	0.830297
Q9VZX9	SAHH2_DROME	AhcyL1	Adenosylhomocysteinase-like 1	174000000	162000000	180000000	178000000	179000000	170000000	181000000	189000000	194000000	184000000	195000000	186000000		1.73833e+08	1.88167e+08	1.08245
Q9VZ64	6PGL_DROME	Pgls	Probable 6-phosphogluconolactonase	197000000	162000000	174000000	172000000	166000000	170000000	164000000	180000000	155000000	179000000	176000000	159000000		173500000	1.68833e+08	0.973103
Q7K3D4	Q7K3D4_DROME	zda	peptidylprolyl isomerase	182000000	159000000	168000000	179000000	176000000	175000000	166000000	190000000	165000000	166000000	177000000	174000000		1.73167e+08	173000000	0.999038
Q9VDC6	EBO_DROME	e	Beta-alanyl-bioamine nonribosomal peptide synthetase ebony	166000000	178000000	172000000	172000000	174000000	177000000	175000000	164000000	165000000	182000000	190000000	182000000		1.73167e+08	1.76333e+08	1.01829
Q9V6K1;Q9V6K1-2	TPP2_DROME	TppII	Tripeptidyl-peptidase 2	187000000	171000000	167000000	176000000	165000000	172000000	169000000	181000000	172000000	174000000	180000000	172000000		173000000	1.74667e+08	1.00963
Q9VUJ1	Q9VUJ1_DROME	Prosbeta2	Proteasome subunit beta	172000000	193000000	161000000	172000000	180000000	159000000	177000000	172000000	156000000	176000000	160000000	177000000		1.72833e+08	1.69667e+08	0.981678
Q9VIB5	Q9VIB5_DROME	alpha-Est7	Carboxylic ester hydrolase	176000000	169000000	178000000	157000000	171000000	182000000	181000000	184000000	179000000	192000000	183000000	166000000		1.72167e+08	1.80833e+08	1.05034
Q9W0C1-2	NSYB_DROME	nSyb	Isoform J of Neuronal synaptobrevin	144000000	183000000	182000000	168000000	151000000	204000000	270000000	208000000	313000000	321000000	304000000	226000000		172000000	2.73667e+08	1.59109
Q9VB10	Q9VB10_DROME	Hsdl2	Hydroxysteroid dehydrogenase-like protein 2	168000000	175000000	169000000	185000000	168000000	165000000	180000000	193000000	174000000	182000000	192000000	188000000		1.71667e+08	1.84833e+08	1.0767
P20241;P20241-2	NRG_DROME	Nrg	Neuroglian	161000000	187000000	164000000	166000000	174000000	177000000	184000000	177000000	188000000	195000000	184000000	184000000		171500000	1.85333e+08	1.08066
Q9VXM4	Q9VXM4_DROME	MSBP	LD12946p	167000000	157000000	162000000	168000000	189000000	185000000	129000000	153000000	174000000	176000000	175000000	185000000		1.71333e+08	1.65333e+08	0.964981
Q9VN14	CONT_DROME	Cont	Contactin	172000000	172000000	162000000	177000000	170000000	175000000	180000000	167000000	169000000	179000000	162000000	173000000		1.71333e+08	1.71667e+08	1.00195
Q9V9E3	PREP_DROME	CG3107	Presequence protease, mitochondrial	183000000	170000000	171000000	169000000	168000000	166000000	169000000	158000000	162000000	165000000	168000000	171000000		1.71167e+08	165500000	0.966894
Q9VHA1	Q9VHA1_DROME	SpdS	Spermidine synthase, isoform A	194000000	159000000	172000000	151000000	169000000	177000000	160000000	179000000	170000000	176000000	180000000	158000000		1.70333e+08	170500000	1.00098
Q9VLJ6	ACER_DROME	Acer	Angiotensin-converting enzyme-related protein	207000000	210000000	149000000	149000000	158000000	148000000	157000000	170000000	156000000	156000000	128000000	151000000		1.70167e+08	153000000	0.899119
Q9VJD1	Q9VJD1_DROME	GCS2beta	Glucosidase 2 subunit beta	167000000	160000000	172000000	181000000	180000000	159000000	155000000	165000000	148000000	164000000	155000000	158000000		1.69833e+08	157500000	0.92738
Q7JWD6	Q7JWD6_DROME	EloC	Elongin-C	155000000	180000000	176000000	166000000	165000000	175000000	183000000	173000000	181000000	170000000	186000000	187000000		169500000	180000000	1.06195
Q8SXX1	Q8SXX1_DROME	PIP4K	Phosphatidylinositol 5-phosphate 4-kinase, isoform A	166000000	170000000	183000000	165000000	166000000	164000000	193000000	166000000	172000000	176000000	184000000	188000000		169000000	1.79833e+08	1.0641
Q9VDT1	Q9VDT1_DROME	Arc42	Short-chain specific acyl-CoA dehydrogenase, mitochondrial	181000000	165000000	168000000	174000000	153000000	171000000	175000000	158000000	154000000	164000000	165000000	163000000		1.68667e+08	1.63167e+08	0.967391
Q9VV47	Q9VV47_DROME	Dmel\CG4842	GH15220p	170000000	174000000	156000000	173000000	169000000	169000000	163000000	173000000	162000000	165000000	169000000	164000000		168500000	166000000	0.985163
P15425	CYPR_DROME	ninaA	Peptidyl-prolyl cis-trans isomerase, rhodopsin-specific isozyme	204000000	155000000	178000000	185000000	149000000	138000000	135000000	164000000	133000000	138000000	146000000	143000000		1.68167e+08	1.43167e+08	0.851338
Q9VPN5	Q9VPN5_DROME	Stip1	Stress-induced-phosphoprotein 1	173000000	156000000	171000000	166000000	179000000	164000000	155000000	162000000	153000000	154000000	155000000	156000000		1.68167e+08	1.55833e+08	0.92666
Q7K1M4	Q7K1M4_DROME	Dmel\CG1902	SD04017p	173000000	165000000	170000000	178000000	174000000	147000000	170000000	171000000	179000000	179000000	173000000	181000000		1.67833e+08	175500000	1.04568
Q9VCV4	Q9VCV4_DROME	Irp-1A	Iron regulatory protein 1A	178000000	155000000	164000000	179000000	173000000	154000000	159000000	167000000	159000000	162000000	168000000	164000000		1.67167e+08	1.63167e+08	0.976072
O61492-2	FLOT2_DROME	Flo2	Isoform B of Flotillin-2	171000000	161000000	161000000	172000000	172000000	166000000	177000000	177000000	183000000	188000000	186000000	189000000		1.67167e+08	1.83333e+08	1.09671
Q9W2D9	EIF3K_DROME	eIF3k	Eukaryotic translation initiation factor 3 subunit K	136000000	184000000	173000000	150000000	168000000	192000000	192000000	194000000	193000000	201000000	188000000	190000000		1.67167e+08	193000000	1.15454
Q9U9Q4	EIF3H_DROME	eIF3h	Eukaryotic translation initiation factor 3 subunit H	164000000	152000000	162000000	167000000	178000000	179000000	136000000	152000000	143000000	148000000	145000000	155000000		167000000	146500000	0.877246
Q9VVC3	Q9VVC3_DROME	Cpr73D	Cuticular protein 73D, isoform B	169000000	160000000	146000000	152000000	177000000	197000000	181000000	153000000	198000000	197000000	188000000	186000000		1.66833e+08	1.83833e+08	1.1019
A0A6H2EG56	A0A6H2EG56_DROME	Tm1	Tropomyosin 1, isoform T	133000000	190000000	168000000	154000000	163000000	190000000	205000000	180000000	223000000	208000000	206000000	195000000		1.66333e+08	2.02833e+08	1.21944
Q7KVI9	Q7KVI9_DROME	BcDNA:RH38235	Uncharacterized protein, isoform B	158000000	159000000	161000000	194000000	169000000	155000000	167000000	176000000	193000000	185000000	180000000	178000000		166000000	1.79833e+08	1.08333
M9NEX3;Q8IRR0;Q8SY77	M9NEX3_DROME;Q8IRR0_DROME;Q8SY77_DROME	BcDNA:RH45308;Dmel\CG3566	Uncharacterized protein, isoform D	158000000	191000000	159000000	161000000	155000000	169000000	183000000	173000000	167000000	184000000	184000000	186000000		165500000	179500000	1.08459
Q9VRJ4	Q9VRJ4_DROME	Dhrs4	Dehydrogenase/reductase 4	173000000	155000000	163000000	173000000	167000000	156000000	161000000	165000000	167000000	170000000	176000000	173000000		164500000	1.68667e+08	1.02533
Q9W2N0	CAPZA_DROME	cpa	F-actin-capping protein subunit alpha	170000000	160000000	154000000	163000000	171000000	164000000	179000000	169000000	176000000	164000000	176000000	169000000		1.63667e+08	1.72167e+08	1.05193
Q9VXX8	RL371_DROME	RpL37-1	Large ribosomal subunit protein eL37A	140000000	155000000	175000000	148000000	177000000	186000000	127000000	145000000	156000000	131000000	141000000	147000000		163500000	1.41167e+08	0.863405
Q9VP02	Q9VP02_DROME	CG12562	Aldose 1-epimerase	152000000	159000000	168000000	152000000	172000000	177000000	112000000	121000000	115000000	118000000	126000000	114000000		1.63333e+08	1.17667e+08	0.720408
Q9VYY2	SPCS2_DROME	Spase25	Signal peptidase complex subunit 2	166000000	148000000	158000000	168000000	170000000	170000000	148000000	168000000	145000000	147000000	153000000	148000000		1.63333e+08	151500000	0.927551
Q0KIE7	Q0KIE7_DROME	Ank	Ankyrin, isoform B	163000000	163000000	168000000	165000000	157000000	162000000	175000000	172000000	173000000	176000000	176000000	172000000		163000000	174000000	1.06748
Q9VFV1	Q9VFV1_DROME	yellow-e	RE55542p	133000000	158000000	162000000	167000000	176000000	181000000	165000000	154000000	168000000	168000000	165000000	165000000		1.62833e+08	1.64167e+08	1.00819
Q9VRP3	Q9VRP3_DROME	Txl	AT08565p	179000000	156000000	156000000	163000000	173000000	149000000	148000000	156000000	141000000	140000000	158000000	143000000		1.62667e+08	1.47667e+08	0.907787
Q9V595	DCUP_DROME	Urod	Uroporphyrinogen decarboxylase	151000000	159000000	172000000	174000000	161000000	158000000	170000000	178000000	184000000	170000000	186000000	170000000		162500000	1.76333e+08	1.08513
Q9W392	Q9W392_DROME	CCT2	T-complex protein 1 subunit beta	179000000	152000000	156000000	163000000	168000000	156000000	144000000	160000000	150000000	143000000	144000000	146000000		1.62333e+08	1.47833e+08	0.910678
O18373	SPS1_DROME	Sps1	Inactive selenide, water dikinase-like protein	178000000	173000000	160000000	160000000	156000000	147000000	155000000	145000000	167000000	171000000	168000000	170000000		1.62333e+08	1.62667e+08	1.00205
A1Z847	A1Z847_DROME	Dmel\CG2269	Uncharacterized protein, isoform B	156000000	160000000	153000000	162000000	176000000	166000000	169000000	169000000	180000000	191000000	175000000	184000000		1.62167e+08	178000000	1.09764
P41044	CAB32_DROME	Cbp53E	Calbindin-32	163000000	171000000	168000000	158000000	162000000	149000000	193000000	176000000	188000000	175000000	194000000	194000000		1.61833e+08	1.86667e+08	1.15345
Q9VA42	Q9VA42_DROME	Npc2g	Niemann-Pick type C-2g, isoform A	193000000	178000000	157000000	162000000	172000000	107000000	98400000	130000000	82200000	99000000	85200000	107000000		161500000	100300000	0.621053
Q9VXG4	ANX11_DROME	AnxB11	Annexin B11	168000000	157000000	160000000	160000000	161000000	163000000	171000000	175000000	172000000	159000000	177000000	159000000		161500000	1.68833e+08	1.04541
P35421	PUR4_DROME	Pfas	Phosphoribosylformylglycinamidine synthase	168000000	162000000	176000000	159000000	154000000	149000000	125000000	139000000	134000000	139000000	138000000	123000000		1.61333e+08	133000000	0.82438
Q8IQX5;Q9VWQ7	Q8IQX5_DROME;Q9VWQ7_DROME	Dmel\CG6891	Uncharacterized protein, isoform B	167000000	163000000	154000000	158000000	166000000	160000000	170000000	145000000	166000000	163000000	150000000	157000000		1.61333e+08	158500000	0.982438
P54397	FKB39_DROME	Fkbp39	39 kDa FK506-binding nuclear protein	170000000	158000000	145000000	156000000	164000000	172000000	127000000	146000000	162000000	163000000	142000000	142000000		1.60833e+08	147000000	0.91399
Q9VY92	Q9VY92_DROME	Dmel\CG11151	GEO07753p1	161000000	141000000	152000000	179000000	176000000	152000000	144000000	150000000	133000000	144000000	148000000	153000000		1.60167e+08	1.45333e+08	0.907388
Q7K5M6	Q7K5M6_DROME	Sip1	GH04176p	165000000	158000000	156000000	172000000	160000000	149000000	146000000	158000000	132000000	135000000	135000000	156000000		160000000	1.43667e+08	0.897917
Q9W1V3	FBRL_DROME	Fib	rRNA 2'-O-methyltransferase fibrillarin	178000000	153000000	167000000	163000000	147000000	150000000	125000000	144000000	130000000	120000000	128000000	125000000		1.59667e+08	1.28667e+08	0.805846
O46067	O46067_DROME	Grp170	Hypoxia up-regulated protein 1	161000000	146000000	158000000	166000000	166000000	160000000	156000000	158000000	144000000	154000000	155000000	150000000		159500000	1.52833e+08	0.958203
Q7JQH9;Q9V3K9	Q7JQH9_DROME;Q9V3K9_DROME	whd	LD31742p	148000000	168000000	178000000	143000000	152000000	167000000	161000000	185000000	157000000	158000000	171000000	141000000		1.59333e+08	1.62167e+08	1.01778
P02840	SGS3_DROME	Sgs3	Salivary glue protein Sgs-3	221000000	15500000	15800000	91000000	357000000	255000000	8260000	65500000	13000000	48400000	123000000	18700000		1.59217e+08	4.61433e+07	0.289815
Q9W3W8	RL17_DROME	RpL17	Large ribosomal subunit protein uL22	154000000	152000000	177000000	181000000	139000000	152000000	129000000	155000000	129000000	113000000	131000000	131000000		1.59167e+08	1.31333e+08	0.825131
O44226	O44226_DROME	EloB	Elongin B	161000000	140000000	170000000	139000000	164000000	179000000	186000000	184000000	202000000	226000000	204000000	185000000		1.58833e+08	1.97833e+08	1.24554
Q9V431	API5_DROME	cass	Apoptosis inhibitor 5 homolog	162000000	164000000	150000000	160000000	161000000	154000000	171000000	155000000	165000000	169000000	167000000	169000000		158500000	166000000	1.04732
Q9V813	MTAP_DROME	Mtap	S-methyl-5'-thioadenosine phosphorylase	164000000	147000000	172000000	143000000	156000000	168000000	173000000	178000000	177000000	183000000	178000000	170000000		1.58333e+08	176500000	1.11474
Q05783	HMGD_DROME	HmgD	High mobility group protein D	132000000	189000000	161000000	134000000	154000000	180000000	181000000	190000000	221000000	201000000	216000000	171000000		1.58333e+08	1.96667e+08	1.24211
G2J5Z0	G2J5Z0_DROME	CG8446-RE	FI15274p1	147000000	150000000	170000000	161000000	164000000	156000000	163000000	163000000	163000000	169000000	160000000	153000000		158000000	1.61833e+08	1.02426
Q6IGN6	Q6IGN6_DROME	Dmel\CG34228	HDC05827	143000000	149000000	167000000	170000000	155000000	163000000	121000000	143000000	150000000	164000000	164000000	155000000		1.57833e+08	149500000	0.947202
A1Z9U2	A1Z9U2_DROME	jef	Jet fuel, isoform A	157000000	159000000	151000000	162000000	172000000	146000000	178000000	169000000	168000000	157000000	171000000	178000000		1.57833e+08	1.70167e+08	1.07814
Q8SXQ5	Q8SXQ5_DROME	Grx5	RH03087p	133000000	152000000	170000000		176000000		163000000	145000000	180000000	179000000	179000000	152000000		157750000	1.66333e+08	1.05441
Q9VHQ0	Q9VHQ0_DROME	mRpS18A	FI06460p	168000000	153000000	168000000	168000000	149000000	138000000	151000000	128000000	180000000	194000000	174000000	159000000		1.57333e+08	1.64333e+08	1.04449
Q86B44	Q86B44_DROME	Gss2	Glutathione synthetase	143000000	158000000	158000000	159000000	160000000	164000000	169000000	177000000	189000000	171000000	175000000	173000000		157000000	1.75667e+08	1.1189
Q9W3N1	Q9W3N1_DROME	spidey	RH59310p	155000000	132000000	133000000	230000000	170000000	121000000	120000000	184000000	122000000	118000000	121000000	121000000		1.56833e+08	131000000	0.835282
Q9VVW7	Q9VVW7_DROME	CNPYb	Canopy b	166000000	178000000	125000000	160000000	127000000	184000000	161000000	146000000	128000000	151000000	155000000	166000000		1.56667e+08	1.51167e+08	0.964894
Q9VHV5	ARL8_DROME	Arl8	ADP-ribosylation factor-like protein 8	144000000	148000000	154000000	179000000	165000000	149000000	189000000	178000000	169000000	171000000	196000000	176000000		156500000	1.79833e+08	1.14909
Q7KT16	Q7KT16_DROME	vari	FI17352p1	150000000	152000000	162000000	164000000	159000000	149000000	156000000	158000000	162000000	165000000	163000000	167000000		156000000	1.61833e+08	1.03739
Q9VCK0	EI3D1_DROME	eIF3d1	Eukaryotic translation initiation factor 3 subunit D-1	146000000	156000000	157000000	145000000	158000000	173000000	164000000	155000000	140000000	146000000	152000000	126000000		1.55833e+08	1.47167e+08	0.944385
Q7KTP7	Q7KTP7_DROME	CG5822	LP22840p	164000000	157000000	151000000	150000000	158000000	154000000	154000000	152000000	140000000	137000000	145000000	146000000		1.55667e+08	1.45667e+08	0.93576
Q9VIC9	Q9VIC9_DROME	Dmel\CG8665	10-formyltetrahydrofolate dehydrogenase	155000000	156000000	158000000	145000000	145000000	174000000	85500000	89000000	94000000	95600000	112000000	87300000		155500000	93900000	0.603859
Q86BM5	Q86BM5_DROME	Akap200	A kinase anchor protein 200, isoform D	154000000	158000000	157000000	150000000	153000000	159000000	170000000	173000000	188000000	196000000	171000000	179000000		1.55167e+08	179500000	1.15682
Q9VPF3	Q9VPF3_DROME	Hpd	4-hydroxyphenylpyruvate dioxygenase	158000000	177000000	149000000	143000000	148000000	154000000	116000000	95300000	113000000	109000000	123000000	119000000		1.54833e+08	112550000	0.726911
P48611	PTPS_DROME	pr	6-pyruvoyl tetrahydrobiopterin synthase	152000000	148000000	170000000	145000000	165000000	146000000	125000000	129000000	123000000	118000000	122000000	119000000		1.54333e+08	1.22667e+08	0.794816
Q9VWA1	CLC_DROME	Clc	Clathrin light chain	153000000	160000000	155000000	148000000	149000000	161000000	165000000	154000000	158000000	162000000	153000000	162000000		1.54333e+08	159000000	1.03024
Q9VUK8	GARS_DROME	GlyRS	Glycine--tRNA ligase	157000000	154000000	155000000	156000000	150000000	152000000	131000000	136000000	130000000	135000000	131000000	129000000		154000000	132000000	0.857143
A8DYC5	A8DYC5_DROME	ND-MWFE	NADH dehydrogenase [ubiquinone] 1 alpha subcomplex subunit 1	212000000	147000000	123000000	157000000	133000000	149000000	140000000	149000000	125000000	143000000	137000000	152000000		153500000	141000000	0.918567
Q8SXY6	TMEDA_DROME	bai	Transmembrane emp24 domain-containing protein bai	110000000	118000000	128000000	172000000	180000000	213000000	159000000	123000000	168000000	118000000	149000000	158000000		153500000	1.45833e+08	0.950054
Q8MYU6;Q9VW17	Q8MYU6_DROME;Q9VW17_DROME	BcDNA:RH51268;Dmel\CG9368	RH51268p	152000000	151000000	148000000	166000000	152000000	152000000	161000000	152000000	154000000	155000000	152000000	152000000		153500000	1.54333e+08	1.00543
P22979	HSP6C_DROME	Hsp67Bc	Heat shock protein 67B3	161000000	147000000	145000000	164000000	162000000	138000000	127000000	133000000	136000000	134000000	144000000	138000000		1.52833e+08	1.35333e+08	0.885496
M9PD08;Q9VK85	M9PD08_DROME;Q9VK85_DROME	eRF3	Eukaryotic peptide chain release factor GTP-binding subunit	155000000	147000000	150000000	153000000	149000000	163000000	150000000	163000000	158000000	157000000	163000000	153000000		1.52833e+08	1.57333e+08	1.02944
Q24583	VATF1_DROME	Vha14-1	V-type proton ATPase subunit F 1	129000000	180000000	149000000	147000000	132000000	180000000	175000000	151000000	176000000	169000000	178000000	180000000		1.52833e+08	171500000	1.12214
Q9VG97	GSTD3_DROME	GstD3	Inactive glutathione S-transferase D3	158000000	176000000	134000000	146000000	144000000	157000000	184000000	152000000	165000000	164000000	172000000	182000000		152500000	1.69833e+08	1.11366
P08181	CSK2A_DROME	CkIIalpha	Casein kinase II subunit alpha	179000000	179000000	147000000	172000000	125000000	112000000	160000000	131000000	180000000	172000000	169000000	150000000		1.52333e+08	1.60333e+08	1.05252
Q9V674	CP6G1_DROME	Cyp6g1	Cytochrome P450 6g1	153000000	164000000	168000000	158000000	130000000	136000000	174000000	136000000	149000000	151000000	169000000	160000000		151500000	156500000	1.033
Q9VMP9	GNPI_DROME	Oscillin	Glucosamine-6-phosphate isomerase	150000000	147000000	154000000	149000000	161000000	148000000	154000000	153000000	167000000	154000000	168000000	158000000		151500000	159000000	1.0495
Q9VDC3	Q9VDC3_DROME	AP-2sigma	AP complex subunit sigma	149000000	161000000	134000000	154000000	158000000	153000000	167000000	188000000	179000000	178000000	172000000	196000000		151500000	180000000	1.18812
A8JUZ6	A8JUZ6_DROME	Dmel\CG14445	MIP03678p	165000000	135000000	155000000	149000000	160000000	144000000	175000000	153000000	178000000	168000000	177000000	184000000		1.51333e+08	172500000	1.13987
Q9VY87	Q9VY87_DROME	CtsB	Cathepsin B1, isoform A	194000000	160000000	137000000	134000000	139000000	141000000	133000000	132000000	128000000	125000000	135000000	120000000		1.50833e+08	1.28833e+08	0.854144
A0A0B4KFR8	A0A0B4KFR8_DROME	Zasp52	Z band alternatively spliced PDZ-motif protein 52, isoform L	137000000	153000000	172000000	159000000	145000000	138000000	117000000	130000000	114000000	116000000	125000000	122000000		1.50667e+08	1.20667e+08	0.800885
Q7K550	EIF3J_DROME	eIF3j	Eukaryotic translation initiation factor 3 subunit J	159000000	142000000	148000000	137000000	153000000	163000000	132000000	129000000	133000000	114000000	137000000	131000000		1.50333e+08	1.29333e+08	0.86031
Q7KTC0;Q9VK56	Q7KTC0_DROME;Q9VK56_DROME	MRP	Multidrug-Resistance like protein 1, isoform I	146000000	148000000	146000000	154000000	153000000	147000000	141000000	153000000	143000000	143000000	148000000	143000000		149000000	1.45167e+08	0.974273
Q7K2G1-2	ADRM1_DROME	Rpn13	Isoform 2 of Proteasomal ubiquitin receptor ADRM1 homolog	149000000	145000000	138000000	132000000	157000000	172000000	145000000	157000000	159000000	137000000	145000000	145000000		1.48833e+08	148000000	0.994401
Q9VXJ0	DHB4_DROME	Mfe2	Peroxisomal multifunctional enzyme type 2	138000000	143000000	156000000	150000000	148000000	156000000	157000000	153000000	153000000	156000000	163000000	156000000		148500000	1.56333e+08	1.05275
Q9VC53	Q9VC53_DROME	CG13621	BolA-like protein DDB_G0274169	160000000	155000000	142000000	145000000	148000000	141000000	150000000	161000000	148000000	156000000	168000000	159000000		148500000	157000000	1.05724
A1Z843	A1Z843_DROME	Dmel\CG1371	Nodal modulator 3	159000000	133000000	142000000	152000000	152000000	150000000	135000000	140000000	127000000	146000000	134000000	132000000		148000000	1.35667e+08	0.916667
M9PF36	M9PF36_DROME	DmTOM1	Uncharacterized protein, isoform C	166000000	145000000	145000000	167000000	137000000	128000000	143000000	156000000	149000000	149000000	148000000	163000000		148000000	1.51333e+08	1.02252
A0A0B4LGF5;A1Z9N0	A0A0B4LGF5_DROME;A1Z9N0_DROME	Opa1	Dynamin-like GTPase OPA1, mitochondrial	142000000	151000000	152000000	144000000	146000000	153000000	164000000	162000000	162000000	165000000	162000000	163000000		148000000	163000000	1.10135
Q95SS8	TMM70_DROME	CG7506	Transmembrane protein 70 homolog, mitochondrial	131000000	166000000	156000000	136000000	125000000	172000000	169000000	143000000	171000000	162000000	196000000	150000000		1.47667e+08	1.65167e+08	1.11851
Q9VN25	EIF3A_DROME	eIF3a	Eukaryotic translation initiation factor 3 subunit A	143000000	148000000	149000000	155000000	136000000	154000000	150000000	148000000	151000000	150000000	154000000	147000000		147500000	150000000	1.01695
Q9VNC1	Q9VNC1_DROME	mRpL44	Large ribosomal subunit protein mL44	161000000	138000000	133000000	137000000	153000000	162000000	97400000	98000000	110000000	112000000	112000000	99100000		1.47333e+08	104750000	0.710973
P12646	G6PD_DROME	Zw	Glucose-6-phosphate 1-dehydrogenase	148000000	125000000	142000000	166000000	152000000	151000000	112000000	127000000	112000000	124000000	117000000	109000000		1.47333e+08	1.16833e+08	0.792986
Q9VRD6	Q9VRD6_DROME	Ntf-2	NTF2-related export protein	155000000	150000000	140000000	155000000	143000000	138000000	130000000	134000000	140000000	146000000	136000000	138000000		1.46833e+08	1.37333e+08	0.935301
Q9VZU7	Q9VZU7_DROME	Usp5	Ubiquitin carboxyl-terminal hydrolase	150000000	154000000	156000000	160000000	132000000	126000000	139000000	120000000	148000000	147000000	144000000	133000000		1.46333e+08	138500000	0.946469
Q8T4G5	Q8T4G5_DROME	Afg3l2	AFG3 like matrix AAA peptidase subunit 2, isoform A	144000000	139000000	149000000	145000000	152000000	149000000	157000000	159000000	161000000	158000000	162000000	161000000		1.46333e+08	1.59667e+08	1.09112
Q8SY53	Q8SY53_DROME	Ostgamma	GH11935p	152000000	141000000	149000000	149000000	141000000	145000000	130000000	136000000	128000000	123000000	128000000	119000000		1.46167e+08	1.27333e+08	0.871152
Q9VLS7;X2JDJ3	Q9VLS7_DROME;X2JDJ3_DROME	PAPLA1	LD21067p	146000000	135000000	152000000	145000000	158000000	139000000	153000000	161000000	145000000	147000000	145000000	150000000		1.45833e+08	1.50167e+08	1.02971
M9PBQ0;M9PHG8	M9PBQ0_DROME;M9PHG8_DROME	Dhc64C	Dynein heavy chain 64C, isoform D	135000000	144000000	154000000	143000000	145000000	154000000	157000000	157000000	153000000	156000000	158000000	154000000		1.45833e+08	1.55833e+08	1.06857
Q00174	LAMA_DROME	LanA	Laminin subunit alpha	142000000	141000000	144000000	150000000	150000000	144000000	153000000	137000000	143000000	146000000	137000000	149000000		1.45167e+08	1.44167e+08	0.993111
Q9VV72	MINP1_DROME	Mipp1	Multiple inositol polyphosphate phosphatase 1	159000000	148000000	145000000	136000000	147000000	132000000	131000000	134000000	132000000	138000000	125000000	140000000		144500000	1.33333e+08	0.922722
Q9VU38	Q9VU38_DROME	Adk2	Adenosine kinase	156000000	131000000	155000000	141000000	146000000	138000000	148000000	174000000	149000000	153000000	154000000	147000000		144500000	1.54167e+08	1.0669
Q9VMH2	Q9VMH2_DROME	Arpc4	Actin-related protein 2/3 complex subunit 4	151000000	126000000	142000000	150000000	153000000	143000000	149000000	159000000	158000000	158000000	159000000	165000000		1.44167e+08	158000000	1.09595
D5AEK7;Q9VV51	D5AEK7_DROME;Q9VV51_DROME	Agpat3	1-Acylglycerol-3-phosphate O-acyltransferase 3, isoform E	139000000	148000000	151000000	143000000	143000000	140000000	175000000	169000000	168000000	159000000	167000000	156000000		144000000	1.65667e+08	1.15046
Q95RF6	Q95RF6_DROME	Tom20	LD34461p	151000000	146000000	150000000	137000000	137000000	142000000	160000000	125000000	181000000	161000000	158000000	147000000		1.43833e+08	1.55333e+08	1.07995
P54193	OB83A_DROME	Obp83a	General odorant-binding protein 83a	151000000	144000000	155000000	130000000	142000000	141000000	173000000	158000000	171000000	171000000	158000000	172000000		1.43833e+08	1.67167e+08	1.16222
P40417	ERKA_DROME	rl	Mitogen-activated protein kinase ERK-A	144000000	151000000	134000000	136000000	138000000	158000000	148000000	143000000	151000000	157000000	146000000	150000000		143500000	1.49167e+08	1.03949
Q9VTU4	EIF3L_DROME	eIF3l	Eukaryotic translation initiation factor 3 subunit L	154000000	134000000	160000000	167000000	126000000	120000000	157000000	121000000	153000000	158000000	162000000	154000000		143500000	1.50833e+08	1.0511
A1Z8N1	TRE11_DROME	Tret1-1	Facilitated trehalose transporter Tret1-1	131000000	142000000	145000000	136000000	137000000	170000000	174000000	180000000	193000000	189000000	189000000	157000000		143500000	1.80333e+08	1.25668
P45437	COPB_DROME	betaCOP	Coatomer subunit beta	150000000	135000000	142000000	150000000	148000000	135000000	148000000	158000000	138000000	140000000	145000000	147000000		1.43333e+08	146000000	1.0186
Q9VZ01	Q9VZ01_DROME	NdufV3	RH44935p	152000000	163000000	125000000	143000000	142000000	135000000	153000000	159000000	163000000	185000000	167000000	174000000		1.43333e+08	1.66833e+08	1.16395
Q9VZ49	ENDOU_DROME	CG2145	Endoribonuclease CG2145	152000000	163000000	142000000	117000000	140000000	145000000	128000000	133000000	126000000	124000000	115000000	141000000		1.43167e+08	1.27833e+08	0.892899
A1ZAX1	EIF3C_DROME	eIF3c	Eukaryotic translation initiation factor 3 subunit C	153000000	135000000	151000000	151000000	133000000	136000000	136000000	148000000	130000000	130000000	139000000	126000000		1.43167e+08	1.34833e+08	0.941793
Q9VZY0	Q9VZY0_DROME	Non2	LD45195p	154000000	130000000	145000000	152000000	141000000	136000000	122000000	143000000	140000000	150000000	128000000	145000000		143000000	138000000	0.965035
Q9VIE7	Q9VIE7_DROME	bur	GMP synthase (glutamine-hydrolyzing)	143000000	146000000	140000000	133000000	143000000	150000000	130000000	131000000	138000000	141000000	135000000	129000000		142500000	134000000	0.940351
Q9W4K0	Q9W4K0_DROME	CHOp24	CHOp24, isoform A	134000000	161000000	134000000	158000000	140000000	127000000	145000000	144000000	135000000	138000000	134000000	157000000		1.42333e+08	1.42167e+08	0.998829
P92208	JNK_DROME	bsk	Stress-activated protein kinase JNK	118000000	157000000	134000000	133000000	144000000	168000000	160000000	160000000	163000000	151000000	152000000	148000000		1.42333e+08	1.55667e+08	1.09368
Q9W3C3	Q9W3C3_DROME	Dmel\CG2004	LD10016p	147000000	142000000	148000000	134000000	141000000	141000000	130000000	134000000	143000000	134000000	144000000	126000000		1.42167e+08	1.35167e+08	0.950762
Q9V3Y3	DFP_DROME	l(2)34Fc	Defense protein l(2)34Fc	145000000	148000000	141000000	130000000	147000000	141000000	117000000	116000000	112000000	124000000	104000000	113000000		142000000	1.14333e+08	0.805164
Q9VPQ2	DJSHV_DROME	shv	DnaJ homolog shv	142000000	138000000	137000000	138000000	156000000	141000000	128000000	143000000	132000000	123000000	142000000	143000000		142000000	1.35167e+08	0.951878
A1ZB71	A1ZB71_DROME	GstE6	Glutathione S transferase E6	143000000	151000000	141000000	139000000	143000000	134000000	144000000	152000000	156000000	156000000	152000000	167000000		1.41833e+08	154500000	1.08931
Q9VB79	Q9VB79_DROME	Dmel\CG14259	IP09473p	127000000	143000000	145000000	147000000	146000000	142000000	133000000	131000000	126000000	129000000	141000000	149000000		1.41667e+08	1.34833e+08	0.951765
Q9W4X7	EI3G1_DROME	eIF3g1	Eukaryotic translation initiation factor 3 subunit G-1	145000000	139000000	142000000	138000000	133000000	153000000	172000000	145000000	162000000	181000000	160000000	167000000		1.41667e+08	164500000	1.16118
P23128	DDX6_DROME	me31B	ATP-dependent RNA helicase me31b	150000000	134000000	139000000	140000000	143000000	142000000	155000000	166000000	152000000	154000000	158000000	166000000		1.41333e+08	158500000	1.12146
Q9U6R9	Q9U6R9_DROME	gammaSnap1	Gamma-soluble NSF attachment protein	136000000	144000000	138000000	144000000	141000000	143000000	147000000	146000000	151000000	166000000	150000000	146000000		141000000	151000000	1.07092
Q9VCJ8	SPE_DROME	SPE	Spaetzle-processing enzyme	115000000	161000000	134000000	126000000	162000000	145000000	115000000	119000000	115000000	111000000	111000000	112000000		140500000	1.13833e+08	0.810202
Q9VV37	Q9VV37_DROME	Dmel\CG13056	GEO13385p1	150000000	82800000	116000000	185000000	130000000	179000000	187000000	125000000	186000000	183000000	176000000	160000000		1.40467e+08	169500000	1.20669
O44081	DKC1_DROME	Nop60B	H/ACA ribonucleoprotein complex subunit 4	128000000	143000000	155000000	142000000	133000000	141000000	134000000	131000000	124000000	105000000	107000000	126000000		1.40333e+08	1.21167e+08	0.86342
Q9VKB0;Q8IP94	Q8IP94_DROME;Q9VKB0_DROME	ThrRS	threonine--tRNA ligase	141000000	125000000	146000000	147000000	148000000	134000000	135000000	142000000	133000000	136000000	132000000	133000000		1.40167e+08	1.35167e+08	0.964328
P02517	HSP26_DROME	Hsp26	Heat shock protein 26	133000000	157000000	138000000	116000000	142000000	155000000	137000000	120000000	151000000	156000000	151000000	132000000		1.40167e+08	1.41167e+08	1.00713
Q9VSL4	Q9VSL4_DROME	GstO2	Glutathione S transferase O2, isoform B	129000000	138000000	131000000	138000000	150000000	155000000	148000000	139000000	157000000	158000000	152000000	128000000		1.40167e+08	147000000	1.04875
Q9VFV9	Q9VFV9_DROME	Droj2	DnaJ-like-2, isoform A	142000000	147000000	139000000	135000000	120000000	156000000	162000000	120000000	178000000	190000000	155000000	150000000		1.39833e+08	1.59167e+08	1.13826
Q9W058;Q9W058-2	SCOT_DROME	SCOT	Succinyl-CoA:3-ketoacid-coenzyme A transferase, mitochondrial	141000000	130000000	144000000	139000000	138000000	144000000	122000000	115000000	116000000	116000000	121000000	110000000		1.39333e+08	1.16667e+08	0.837321
Q9VH64	Q9VH64_DROME	Dmel\CG8507	LD29322p	130000000	138000000	139000000	135000000	144000000	150000000	117000000	127000000	120000000	116000000	124000000	134000000		1.39333e+08	123000000	0.882775
Q9VN86	Q9VN86_DROME	Sccpdh1	AT14148p	139000000	136000000	153000000	154000000	132000000	121000000	159000000	144000000	139000000	147000000	150000000	159000000		1.39167e+08	1.49667e+08	1.07545
Q9VH95	TEBPH_DROME	p23	Prostaglandin E synthase 3 homolog	128000000	166000000	143000000	123000000	129000000	146000000	154000000	151000000	163000000	147000000	151000000	144000000		1.39167e+08	1.51667e+08	1.08982
Q7K2L7	Q7K2L7_DROME	Pef	GH27120p	141000000	140000000	135000000	141000000	141000000	136000000	143000000	139000000	143000000	152000000	149000000	164000000		139000000	1.48333e+08	1.06715
Q8INP8;Q8INP9;Q9VHI8	Q8INP8_DROME;Q8INP9_DROME;Q9VHI8_DROME	Dmel\CG11980;anon-WO0118547.327	Uncharacterized protein, isoform B	125000000	141000000	140000000	132000000	137000000	157000000	137000000	139000000	148000000	146000000	139000000	141000000		1.38667e+08	1.41667e+08	1.02163
Q8SY58	Q8SY58_DROME	Dmel\CG4872	Ketimine reductase mu-crystallin	133000000	132000000	146000000	140000000	133000000	148000000	147000000	169000000	151000000	163000000	158000000	144000000		1.38667e+08	1.55333e+08	1.12019
P26270	PSMD7_DROME	Rpn8	26S proteasome non-ATPase regulatory subunit 7	144000000	140000000	136000000	129000000	140000000	143000000	158000000	146000000	182000000	165000000	185000000	180000000		1.38667e+08	1.69333e+08	1.22115
P22769	PSA71_DROME	Prosalpha4	Proteasome subunit alpha type-7-1	138000000	156000000	131000000	133000000	128000000	144000000	148000000	126000000	161000000	167000000	144000000	151000000		1.38333e+08	149500000	1.08072
Q9W3Z3	AGT_DROME	Agxt	Alanine--glyoxylate aminotransferase	146000000	148000000	159000000	121000000	126000000	129000000	132000000	121000000	128000000	137000000	119000000	107000000		1.38167e+08	124000000	0.897467
Q7K0B6	Q7K0B6_DROME	GstT1	Glutathione S transferase T1	145000000	134000000	142000000	139000000	135000000	134000000	148000000	132000000	136000000	141000000	142000000	136000000		1.38167e+08	1.39167e+08	1.00724
Q9V455	Q9V455_DROME	Kap-alpha3	Importin subunit alpha	151000000	132000000	138000000	136000000	130000000	142000000	144000000	139000000	159000000	144000000	139000000	135000000		1.38167e+08	1.43333e+08	1.03739
B7YZF6	B7YZF6_DROME	ATP8A	Phospholipid-transporting ATPase	123000000	140000000	139000000	148000000	144000000	135000000	147000000	140000000	149000000	147000000	139000000	152000000		1.38167e+08	1.45667e+08	1.05428
Q99323;Q99323-1;Q99323-2;Q99323-4	MYSN_DROME	zip	Myosin heavy chain, non-muscle	138000000	167000000	101000000	99200000	166000000	156000000	125000000	149000000	164000000	137000000	119000000	108000000		1.37867e+08	1.33667e+08	0.969536
Q9VTW1;X2JB05	Q9VTW1_DROME;X2JB05_DROME	Sms	RE15265p	146000000	127000000	142000000	148000000	140000000	124000000	128000000	126000000	133000000	135000000	139000000	141000000		1.37833e+08	1.33667e+08	0.96977
Q9I7K5	TMEDE_DROME	eca	Transmembrane emp24 domain-containing protein eca	145000000	136000000	119000000	139000000	143000000	145000000	131000000	136000000	136000000	148000000	132000000	141000000		1.37833e+08	1.37333e+08	0.996372
Q9XYN7	PSB3_DROME	Prosbeta3	Proteasome subunit beta type-3	132000000	165000000	137000000	131000000	123000000	138000000	151000000	143000000	141000000	159000000	137000000	140000000		1.37667e+08	1.45167e+08	1.05448
Q9W2Y3	NNRE_DROME	Naxe	NAD(P)H-hydrate epimerase	114000000	156000000	178000000	113000000	129000000	136000000	163000000	169000000	161000000	124000000	158000000	102000000		1.37667e+08	1.46167e+08	1.06174
A1Z6L9	A1Z6L9_DROME	Trap1	FI21274p1	134000000	129000000	142000000	139000000	139000000	142000000	137000000	140000000	142000000	148000000	139000000	139000000		137500000	1.40833e+08	1.02424
Q7KV69	Q7KV69_DROME	kst	Karst, isoform B	132000000	136000000	138000000	143000000	135000000	141000000	143000000	142000000	152000000	145000000	142000000	140000000		137500000	144000000	1.04727
Q9VSA9	Q9VSA9_DROME	Dmel\CG7409	CG7409	158000000	121000000	134000000	135000000	148000000	129000000	137000000	149000000	153000000	163000000	169000000	147000000		137500000	153000000	1.11273
Q7KTG2	Q7KTG2_DROME	Apoltp	Apolipoprotein lipid transfer particle	146000000	145000000	144000000	134000000	130000000	124000000	123000000	137000000	130000000	117000000	110000000	114000000		1.37167e+08	1.21833e+08	0.888214
Q961J5	BALAT_DROME	Balat	Beta-alanine transporter	108000000	149000000	145000000	129000000	144000000	148000000	152000000	124000000	123000000	143000000	126000000	137000000		1.37167e+08	1.34167e+08	0.978129
Q9VIU8	Q9VIU8_DROME	Dmel\CG10132	GH25853p	128000000	138000000	145000000	142000000	133000000	137000000	146000000	150000000	156000000	152000000	154000000	151000000		1.37167e+08	151500000	1.1045
P48159	RL23_DROME	RpL23	Large ribosomal subunit protein uL14	133000000	151000000	151000000	176000000	103000000	108000000	132000000	122000000	141000000	154000000	140000000	136000000		137000000	137500000	1.00365
A1ZBW0;A1ZBW1;E1JGN7	A1ZBW0_DROME;A1ZBW1_DROME;E1JGN7_DROME	HnRNP-K	Heterogeneous nuclear ribonucleoprotein K, isoform C	146000000	135000000	132000000	138000000	136000000	134000000	138000000	145000000	136000000	141000000	152000000	156000000		1.36833e+08	1.44667e+08	1.05725
A1ZB69	A1ZB69_DROME	GstE4	Glutathione S transferase E4	146000000	130000000	166000000	125000000	134000000	120000000	138000000	160000000	177000000	153000000	161000000	153000000		1.36833e+08	157000000	1.14738
Q9VXV6	Q9VXV6_DROME	Scamp	Secretory carrier-associated membrane protein	157000000	128000000	134000000	141000000	144000000	114000000	122000000	134000000	128000000	136000000	138000000	139000000		1.36333e+08	1.32833e+08	0.974328
Q8IQB7	Q8IQB7_DROME	BcDNA:RH42907	MIP21654p	148000000	136000000	129000000	131000000	140000000	134000000	158000000	154000000	157000000	144000000	155000000	159000000		1.36333e+08	154500000	1.13325
Q9V4N3;Q9V4N3-2	CYB5_DROME	Cyt-b5	Cytochrome b5	122000000	157000000	123000000	137000000	123000000	156000000	186000000	124000000	154000000	173000000	158000000	158000000		1.36333e+08	1.58833e+08	1.16504
Q9W4P5	VA0D1_DROME	VhaAC39-1	V-type proton ATPase subunit d 1	139000000	136000000	150000000	130000000	144000000	118000000	132000000	141000000	150000000	150000000	146000000	134000000		1.36167e+08	1.42167e+08	1.04406
M9PEE1;P91638;Q9VS62	M9PEE1_DROME;P91638_DROME;Q9VS62_DROME	smid	Smallminded, isoform H	146000000	138000000	124000000	130000000	146000000	132000000	131000000	138000000	145000000	137000000	139000000	139000000		136000000	1.38167e+08	1.01593
Q9XZ63	ARMET_DROME	Manf	Mesencephalic astrocyte-derived neurotrophic factor homolog	137000000	123000000	150000000	132000000	138000000	135000000	140000000	140000000	129000000	129000000	128000000	132000000		1.35833e+08	133000000	0.979141
Q9V773	C6A20_DROME	Cyp6a20	Probable cytochrome P450 6a20	107000000	154000000	124000000	118000000	132000000	179000000	196000000	143000000	191000000	185000000	166000000	173000000		1.35667e+08	1.75667e+08	1.29484
P18932	NU5M_DROME	mt:ND5	NADH-ubiquinone oxidoreductase chain 5	71600000	203000000	190000000	123000000	117000000	109000000	271000000	212000000	198000000	190000000	242000000	239000000		135600000	2.25333e+08	1.66175
Q9VHL1	Q9VHL1_DROME	Dmel\CG9839	LD40589p	128000000	139000000	140000000	135000000	135000000	135000000		110000000	108000000	108000000	108000000	103000000		1.35333e+08	107400000	0.793596
Q8T0V2	Q8T0V2_DROME	MESK2	GH02495p	154000000	124000000	150000000	132000000	137000000	114000000	112000000	126000000	114000000	107000000	121000000	112000000		1.35167e+08	1.15333e+08	0.853268
Q95TK5	Q95TK5_DROME	Dmel\CG1635	LD44914p	137000000	138000000	143000000	132000000	127000000	134000000	145000000	139000000	149000000	152000000	162000000	161000000		1.35167e+08	1.51333e+08	1.11961
Q9VKY3	Q9VKY3_DROME	ClpP	ATP-dependent Clp protease proteolytic subunit	142000000	139000000	130000000	132000000	137000000	130000000	126000000	133000000	131000000	126000000	136000000	129000000		135000000	1.30167e+08	0.964198
Q94529	GS1_DROME	Gs1l	Probable pseudouridine-5'-phosphatase	149000000	121000000	130000000	144000000	137000000	127000000	141000000	143000000	142000000	139000000	140000000	148000000		1.34667e+08	1.42167e+08	1.05569
Q9VGA3	Q9VGA3_DROME	Dmel\CG4115	LD12305p	115000000	152000000	126000000	111000000	147000000	154000000	116000000	108000000	128000000	126000000	110000000	125000000		1.34167e+08	1.18833e+08	0.885714
Q9V3S9	BGM_DROME	bgm	Very long-chain-fatty-acid--CoA ligase bubblegum	137000000	114000000	152000000	128000000	134000000	140000000	121000000	137000000	115000000	124000000	120000000	110000000		1.34167e+08	1.21167e+08	0.903106
O15971	O15971_DROME	Rab10	Ras-related protein Rab-10	139000000	118000000	142000000	143000000	133000000	130000000	141000000	148000000	129000000	131000000	139000000	132000000		1.34167e+08	1.36667e+08	1.01863
Q9VG81	Q9VG81_DROME	Sccpdh2	RH49330p	142000000	115000000	149000000	138000000	131000000	129000000	153000000	167000000	163000000	156000000	153000000	141000000		134000000	155500000	1.16045
A8QI34	A8QI34_DROME	JYalpha	Sodium/potassium-transporting ATPase subunit alpha	127000000	154000000	150000000	157000000	116000000	99600000	107000000	94300000	89400000	113000000	92100000	118000000		1.33933e+08	102300000	0.763813
Q8T0Q4	CHM4_DROME	shrb	Charged multivesicular body protein 4	141000000	128000000	136000000	136000000	134000000	125000000	144000000	139000000	143000000	136000000	137000000	147000000		1.33333e+08	141000000	1.0575
Q9VKD3	NFS1_DROME	Nfs1	Cysteine desulfurase, mitochondrial	119000000	137000000	139000000	128000000	135000000	141000000	135000000	139000000	141000000	136000000	139000000	143000000		1.33167e+08	1.38833e+08	1.04255
Q9VZI2	ACK_DROME	Ack	Activated Cdc42 kinase Ack	135000000	122000000	136000000	139000000	137000000	128000000	124000000	116000000	123000000	121000000	125000000	126000000		1.32833e+08	122500000	0.922208
Q00748	MDR65_DROME	Mdr65	Multidrug resistance protein homolog 65	140000000	124000000	142000000	135000000	128000000	128000000	132000000	131000000	130000000	128000000	132000000	127000000		1.32833e+08	130000000	0.97867
Q7PL91	Q7PL91_DROME	ND-AGGG	GEO11417p1	103000000	153000000	134000000	115000000	116000000	176000000	144000000	127000000	143000000	131000000	115000000	151000000		1.32833e+08	1.35167e+08	1.01757
A0A0B4LFR4;Q7K110	A0A0B4LFR4_DROME;Q7K110_DROME	OstDelta	Dolichyl-diphosphooligosaccharide--protein glycosyltransferase subunit 2	137000000	128000000	132000000	130000000	129000000	141000000	137000000	138000000	133000000	139000000	129000000	136000000		1.32833e+08	1.35333e+08	1.01882
Q6AWN0	MTND_DROME	Adi1	Acireductone dioxygenase	143000000	128000000	142000000	135000000	126000000	122000000	111000000	124000000	117000000	120000000	111000000	113000000		1.32667e+08	116000000	0.874372
Q8INK7;Q9VGQ2;A0A0B4K6E6	A0A0B4K6E6_DROME;Q8INK7_DROME;Q9VGQ2_DROME	BcDNA:RH54117;Dmel\CG17734	Uncharacterized protein, isoform C	135000000	134000000	126000000	113000000	131000000	156000000	143000000	140000000	169000000	170000000	148000000	167000000		132500000	1.56167e+08	1.17862
Q7K332	Q7K332_DROME	CG3364	GH17623p	153000000	126000000	132000000	144000000	125000000	114000000	129000000	130000000	114000000	123000000	124000000	140000000		1.32333e+08	1.26667e+08	0.957179
Q7K2D2	DCTN2_DROME	DCTN2-p50	Dynactin subunit 2	134000000	124000000	131000000	133000000	133000000	139000000	136000000	142000000	143000000	147000000	144000000	144000000		1.32333e+08	1.42667e+08	1.07809
P11046	LAMB1_DROME	LanB1	Laminin subunit beta-1	136000000	125000000	128000000	137000000	138000000	128000000	127000000	126000000	113000000	119000000	114000000	127000000		132000000	121000000	0.916667
Q9VG33	Q9VG33_DROME	Dmel\CG12279	Sulfurtransferase	137000000	124000000	135000000	127000000	133000000	135000000	132000000	139000000	131000000	125000000	130000000	131000000		1.31833e+08	1.31333e+08	0.996207
Q9V434	Q9V434_DROME	AsnRS	Asparagine--tRNA ligase, cytoplasmic	130000000	132000000	131000000	126000000	144000000	128000000	132000000	139000000	147000000	141000000	132000000	132000000		1.31833e+08	1.37167e+08	1.04046
Q27889	PP2B2_DROME	Pp2B-14D	Serine/threonine-protein phosphatase 2B catalytic subunit 2	124000000	128000000	142000000	133000000	137000000	126000000	138000000	137000000	135000000	146000000	141000000	144000000		1.31667e+08	1.40167e+08	1.06456
O17444	VACHT_DROME	VAChT	Vesicular acetylcholine transporter	104000000	158000000	128000000	130000000	126000000	143000000	144000000	164000000	149000000	150000000	153000000	164000000		131500000	154000000	1.1711
X2JEY5	X2JEY5_DROME	AMPdeam	AMP deaminase	124000000	130000000	134000000	131000000	130000000	139000000	143000000	145000000	136000000	135000000	135000000	139000000		1.31333e+08	1.38833e+08	1.05711
Q9W374	Q9W374_DROME	su(r)	Dihydropyrimidine dehydrogenase [NADP(+)]	142000000	126000000	128000000	127000000	132000000	132000000	83100000	105000000	98900000	96000000	98700000	90100000		1.31167e+08	95300000	0.726557
P08266	RPB2_DROME	Polr2B	DNA-directed RNA polymerase II subunit RPB2	130000000	136000000	129000000	135000000	131000000	126000000	114000000	116000000	126000000	115000000	113000000	117000000		1.31167e+08	1.16833e+08	0.890724
A1Z934	A1Z934_DROME	Dmel\CG8778	Enoyl-CoA hydratase, mitochondrial	149000000	119000000	140000000	125000000	128000000	124000000	118000000	115000000	114000000	104000000	114000000	111000000		1.30833e+08	1.12667e+08	0.861146
P40301	PSA2_DROME	Prosalpha2	Proteasome subunit alpha type-2	128000000	148000000	126000000	134000000	128000000	121000000	137000000	140000000	135000000	123000000	125000000	135000000		1.30833e+08	132500000	1.01274
Q9VLM5	DAD1_DROME	Dad1	Dolichyl-diphosphooligosaccharide--protein glycosyltransferase subunit DAD1	145000000	125000000	154000000	151000000	106000000	103000000	119000000	138000000	111000000	117000000	111000000	112000000		1.30667e+08	118000000	0.903061
Q9VA18	Q9VA18_DROME	Chchd3	Coiled-coil-helix-coiled-coil-helix domain containing 3	123000000	132000000	138000000	126000000	134000000	130000000	148000000	144000000	151000000	142000000	155000000	141000000		130500000	1.46833e+08	1.12516
Q7JZW0	Q7JZW0_DROME	Cpr51A	Cuticular protein 51A	108000000	108000000	137000000	110000000	165000000	153000000	157000000	152000000	169000000	166000000	145000000	154000000		1.30167e+08	1.57167e+08	1.20743
Q9W258	Q9W258_DROME	babos	Babos, isoform A	138000000	120000000	138000000	127000000	129000000	127000000	116000000	127000000	132000000	124000000	127000000	121000000		1.29833e+08	124500000	0.958922
P54359	SEPT2_DROME	Septin2	Septin-2	124000000	129000000	128000000	131000000	132000000	134000000	140000000	129000000	131000000	136000000	132000000	136000000		1.29667e+08	134000000	1.03342
Q9V420	Q9V420_DROME	mPges2	FI02878p	138000000	126000000	136000000	118000000	135000000	125000000	135000000	167000000	148000000	157000000	187000000	155000000		1.29667e+08	1.58167e+08	1.21979
Q9VXK0	NIPSN_DROME	Nipsnap	Protein NipSnap	123000000	139000000	154000000	117000000	121000000	123000000	135000000	142000000	118000000	121000000	129000000	106000000		129500000	1.25167e+08	0.966538
Q9V396	Q9V396_DROME	CAH1	Carbonic anhydrase	131000000	141000000	130000000	118000000	133000000	124000000	135000000	113000000	136000000	147000000	137000000	129000000		129500000	1.32833e+08	1.02574
Q9VEQ1	Q9VEQ1_DROME	EMC2A	ER membrane protein complex subunit 2	99500000	130000000	136000000	128000000	132000000	151000000	141000000	131000000	131000000	129000000	136000000	152000000		1.29417e+08	1.36667e+08	1.05602
Q08473;Q08473-2;Q08473-3	SQD_DROME	sqd	RNA-binding protein squid	134000000	129000000	117000000	128000000	138000000	130000000	134000000	161000000	169000000	194000000	165000000	157000000		1.29333e+08	1.63333e+08	1.26289
Q7JVX3;Q9VCM8	Q7JVX3_DROME;Q9VCM8_DROME	BEST:GH09055;Dmel\CG4408	LD41739p	144000000	137000000	121000000	117000000	140000000	116000000	81400000	87100000	81600000	72700000	65300000	78500000		1.29167e+08	7.77667e+07	0.602065
Q9VBI3	Q9VBI3_DROME	Vps2	Charged multivesicular body protein 2a	146000000	134000000	129000000	122000000	122000000	122000000	106000000	113000000	105000000	98600000	93100000	104000000		1.29167e+08	1.03283e+08	0.799613
A0A0B4KH84;Q9VB82	A0A0B4KH84_DROME;Q9VB82_DROME	Cpr97Ea	Cuticular protein 97Ea, isoform B	137000000	130000000	112000000	122000000	135000000	139000000	156000000	144000000	154000000	163000000	136000000	148000000		1.29167e+08	1.50167e+08	1.16258
Q9VME1	Q9VME1_DROME	CG33295	FI01864p	161000000	154000000	114000000	117000000	124000000	104000000	83500000	86900000	82900000	78600000	61100000	72600000		129000000	77600000	0.60155
Q9VKZ8	Q9VKZ8_DROME	Usp14	Ubiquitin carboxyl-terminal hydrolase	136000000	129000000	130000000	124000000	128000000	127000000	131000000	133000000	128000000	121000000	119000000	130000000		129000000	127000000	0.984496
Q9W1F7	Q9W1F7_DROME	Stoml2	IP15825p	123000000	123000000	124000000	134000000	134000000	136000000	129000000	134000000	123000000	129000000	131000000	132000000		129000000	1.29667e+08	1.00517
Q9VAC4	Q9VAC4_DROME	Nph	GEO09167p1	157000000	120000000	133000000	135000000	117000000	111000000	99600000	105000000	95600000	105000000	102000000	94800000		1.28833e+08	1.00333e+08	0.778784
Q8IPQ2	Q8IPQ2_DROME	CRMP	Collapsin response mediator protein	137000000	131000000	140000000	133000000	103000000		111000000	132000000	151000000	107000000	128000000	129000000		128800000	1.26333e+08	0.980849
Q0E9F9	Q0E9F9_DROME	Dmel\CG2915	FI16720p1	142000000	137000000	128000000	127000000	123000000	113000000	99000000	109000000	104000000	106000000	99300000	108000000		1.28333e+08	1.04217e+08	0.812078
P33270	CP6A2_DROME	Cyp6a2	Cytochrome P450 6a2	121000000	121000000	137000000	140000000	142000000	109000000	113000000	105000000	115000000	109000000	116000000	118000000		1.28333e+08	1.12667e+08	0.877922
Q9VLU0	BAF_DROME	baf	Barrier-to-autointegration factor	125000000	129000000	112000000	126000000	141000000	137000000	139000000	132000000	128000000	124000000	98100000	137000000		1.28333e+08	126350000	0.984545
O97182	O97182_DROME	Arpc1	Actin-related protein 2/3 complex subunit	125000000	136000000	130000000	117000000	127000000	135000000	141000000	131000000	144000000	148000000	143000000	146000000		1.28333e+08	1.42167e+08	1.10779
Q9VF24	Q9VF24_DROME	cv-d	Crossveinless d	152000000	150000000	121000000	109000000	124000000	113000000	86800000	92800000	86700000	78100000	63900000	86500000		1.28167e+08	8.24667e+07	0.643433
Q95U34	Q95U34_DROME	Galk	GH11113p	133000000	130000000	145000000	108000000	116000000	137000000	102000000	110000000	100000000	103000000	110000000	91400000		1.28167e+08	1.02733e+08	0.80156
Q9VR94	OB19A_DROME	Obp19a	General odorant-binding protein 19a	145000000	111000000	124000000	138000000	142000000	107000000	119000000	114000000	91800000	114000000	107000000	127000000		1.27833e+08	1.12133e+08	0.877184
Q8IPM8	CPLX_DROME	cpx	Complexin	98900000	140000000	130000000	121000000	130000000	146000000	161000000	128000000	181000000	186000000	171000000	165000000		127650000	1.65333e+08	1.29521
P22815	BOSS_DROME	boss	Protein bride of sevenless	141000000	122000000	122000000	124000000	127000000	127000000	156000000	134000000	147000000	148000000	146000000	171000000		1.27167e+08	1.50333e+08	1.18218
Q9VJ39	Q9VJ39_DROME	pepCG10602	Leukotriene A(4) hydrolase	116000000	145000000	134000000	113000000	123000000	128000000	142000000	145000000	145000000	152000000	149000000	140000000		126500000	145500000	1.1502
Q9VSC5	Q9VSC5_DROME	anon-WO0172774.138	GM09977p	129000000	119000000	122000000	130000000	137000000	121000000	107000000	121000000	116000000	107000000	110000000	112000000		1.26333e+08	1.12167e+08	0.887863
Q9VLT3	Q9VLT3_DROME	Mcr	LD23292p	115000000	133000000	125000000	129000000	127000000	128000000	144000000	135000000	148000000	152000000	139000000	145000000		1.26167e+08	1.43833e+08	1.14003
Q86PD3	Q86PD3_DROME	CG30022;CG30023	RE56416p	115000000	120000000	112000000	130000000	148000000	130000000	102000000	103000000	99200000	101000000	110000000	107000000		1.25833e+08	103700000	0.824106
Q9VEX6	ATD3A_DROME	bor	ATPase family AAA domain-containing protein 3A homolog	135000000	118000000	129000000	129000000	117000000	125000000	133000000	127000000	125000000	123000000	122000000	125000000		125500000	1.25833e+08	1.00266
Q02427;Q02427-1	RBP1_DROME	Rbp1	RNA-binding protein 1	125000000	131000000	126000000	130000000	119000000	121000000	127000000	120000000	112000000	127000000	121000000	130000000		1.25333e+08	1.22833e+08	0.980053
Q9VHC7	Q9VHC7_DROME	rump	FI21236p1	121000000	129000000	127000000	127000000	112000000	136000000	135000000	112000000	129000000	136000000	133000000	122000000		1.25333e+08	1.27833e+08	1.01995
Q9W4V3	Q9W4V3_DROME	Dmel\CG14419	RH61722p	111000000	115000000	135000000	136000000	138000000	115000000	113000000	110000000	115000000	109000000	125000000	94600000		125000000	111100000	0.8888
Q9VEP6	Q9VEP6_DROME	Adsl	Adenylosuccinate lyase	141000000	98200000	135000000	121000000	128000000	125000000	88700000	108000000	105000000	98700000	106000000	98600000		124700000	1.00833e+08	0.808607
P91891	MO25_DROME	Mo25	Protein Mo25	129000000	126000000	137000000	140000000	107000000	109000000	136000000	132000000	124000000	128000000	131000000	136000000		1.24667e+08	1.31167e+08	1.05214
Q9VXB0	NECAP_DROME	CG9132	NECAP-like protein CG9132	138000000	128000000	113000000	123000000	125000000	120000000	127000000	124000000	129000000	129000000	130000000	132000000		124500000	128500000	1.03213
Q9V3G7	PSMD6_DROME	Rpn7	26S proteasome non-ATPase regulatory subunit 6	121000000	135000000	132000000	131000000	113000000	113000000	143000000	126000000	152000000	147000000	142000000	139000000		1.24167e+08	141500000	1.1396
Q7JV39	Q7JV39_DROME	Dmel\CG11400	GH01142p	130000000	125000000	112000000	129000000	132000000	115000000	88000000	93400000	84600000	75000000	76200000	76200000		1.23833e+08	8.22333e+07	0.664065
Q8SXC2	Q8SXC2_DROME	Kyat	kynurenine--oxoglutarate transaminase	112000000	168000000	146000000	100000000	103000000	114000000	165000000	177000000	148000000	135000000	132000000	128000000		1.23833e+08	147500000	1.19112
Q0E9G4;Q961L4	Q0E9G4_DROME;Q961L4_DROME	Drat	CG1600-PA	120000000	125000000	137000000	123000000	124000000	113000000	126000000	140000000	123000000	131000000	144000000	137000000		1.23667e+08	133500000	1.07951
A1Z8Y3	A1Z8Y3_DROME	Cpr49Ab	Cuticular protein 49Ab	120000000	117000000	102000000	112000000	166000000	123000000	128000000	119000000	133000000	134000000	119000000	136000000		1.23333e+08	1.28167e+08	1.03919
E1JHE4	E1JHE4_DROME	Fatp1	Long-chain-fatty-acid--CoA ligase	121000000	118000000	127000000	132000000	124000000	118000000	140000000	134000000	129000000	136000000	138000000	133000000		1.23333e+08	135000000	1.09459
Q9VL89	Q9VL89_DROME	und	Methionine aminopeptidase 2	130000000	111000000	115000000	132000000	124000000	127000000	102000000	116000000	90800000	96700000	107000000	104000000		1.23167e+08	102750000	0.834235
Q9VQD8	Q9VQD8_DROME	Arpc5	Actin-related protein 2/3 complex subunit 5	114000000	125000000	128000000	123000000	122000000	126000000	133000000	133000000	150000000	132000000	138000000	129000000		123000000	1.35833e+08	1.10434
A0A0B4K5Z8;A0A0B4K6T4;Q9VNF8	A0A0B4K5Z8_DROME;A0A0B4K6T4_DROME;Q9VNF8_DROME	Sec23	Protein transport protein SEC23	129000000	104000000	120000000	132000000	124000000	128000000	111000000	108000000	108000000	117000000	113000000	107000000		1.22833e+08	1.10667e+08	0.90095
A1ZAK3;A1ZAK4;Q8T0D3	A1ZAK3_DROME;A1ZAK4_DROME;Q8T0D3_DROME	Dek	Dek, isoform C	130000000	113000000	125000000	126000000	127000000	116000000	120000000	125000000	137000000	122000000	133000000	127000000		1.22833e+08	1.27333e+08	1.03664
Q9VL68	Q9VL68_DROME	Dmel\CG4598	RH73277p	118000000	144000000	129000000	119000000	116000000	111000000	137000000	122000000	130000000	133000000	128000000	122000000		1.22833e+08	1.28667e+08	1.04749
Q9VH26	Q9VH26_DROME	CAH7	Carbonic anhydrase	128000000	121000000	121000000	128000000	127000000	112000000	120000000	131000000	130000000	126000000	121000000	146000000		1.22833e+08	129000000	1.0502
A0A0B4K7G1;A0A0B4K897;A0A0B4LGX1;A1ZB80;A1ZB83;E1JGL5	A0A0B4K7G1_DROME;A0A0B4K897_DROME;A0A0B4LGX1_DROME;A1ZB80_DROME;A1ZB83_DROME;E1JGL5_DROME	BcDNA:RE18604;BcDNA:RH27395	Uncharacterized protein, isoform N	135000000	127000000	119000000	116000000	121000000	118000000	121000000	119000000	113000000	98400000	109000000	111000000		1.22667e+08	111900000	0.912228
Q9V4C8;Q9V4C8-6	HCF_DROME	Hcf	Host cell factor	135000000	125000000	125000000	123000000	113000000	114000000	129000000	132000000	128000000	134000000	132000000	124000000		122500000	1.29833e+08	1.05986
Q9V3Z9	Q9V3Z9_DROME	Vajk3	HL02234p	133000000	89700000	112000000	115000000	145000000	140000000	137000000	116000000	149000000	126000000	116000000	130000000		122450000	129000000	1.05349
Q9W3Y3	Q9W3Y3_DROME	Dmel\CG3226	Calcyclin-binding protein	130000000	106000000	117000000	119000000	128000000	134000000	102000000	113000000	102000000	102000000	110000000	101000000		1.22333e+08	105000000	0.858311
M9PE01;Q7KM03;Q7KM04;Q7KM05;Q7KM08;Q9XTK9	M9PE01_DROME;Q7KM03_DROME;Q7KM04_DROME;Q7KM05_DROME;Q7KM08_DROME;Q9XTK9_DROME	Eip63E	Ecdysone-induced protein 63E, isoform N	122000000	121000000	127000000	114000000	126000000	123000000	110000000	111000000	115000000	108000000	119000000	118000000		1.22167e+08	113500000	0.929059
F2FB81;H5V8D0;M9NCT2;M9PCP4;Q9VKM2;X2J5L4	F2FB81_DROME;H5V8D0_DROME;M9NCT2_DROME;M9PCP4_DROME;Q9VKM2_DROME;X2J5L4_DROME	SCAR	Wiskott-Aldrich syndrome protein family member	124000000	109000000	120000000	129000000	132000000	119000000	127000000	129000000	140000000	134000000	126000000	151000000		1.22167e+08	134500000	1.10095
P48809	RB27C_DROME	Hrb27C	Heterogeneous nuclear ribonucleoprotein 27C	132000000	135000000	128000000	111000000	102000000	122000000	120000000	124000000	129000000	133000000	118000000	112000000		1.21667e+08	1.22667e+08	1.00822
P82147	L2EFL_DROME	l(2)efl	Protein lethal(2)essential for life	110000000	136000000	106000000	121000000	130000000	125000000	117000000	113000000	132000000	134000000	131000000	136000000		1.21333e+08	1.27167e+08	1.04808
P17210	KINH_DROME	Khc	Kinesin heavy chain	119000000	120000000	122000000	120000000	120000000	127000000	137000000	131000000	135000000	130000000	132000000	135000000		1.21333e+08	1.33333e+08	1.0989
Q9VPH6	Q9VPH6_DROME	Dmel\CG5618	LP10922p	132000000	126000000	133000000	103000000	106000000	128000000	189000000	160000000	197000000	195000000	165000000	133000000		1.21333e+08	1.73167e+08	1.4272
A0A6F7UQK0	A0A6F7UQK0_DROME	CLIP-190	Cytoplasmic linker protein 190, isoform W	125000000	117000000	130000000	120000000	120000000	115000000	126000000	132000000	131000000	127000000	125000000	126000000		1.21167e+08	1.27833e+08	1.05502
O62602	O62602_DROME	lic	mitogen-activated protein kinase kinase	120000000	113000000	128000000	130000000	123000000	110000000	121000000	135000000	127000000	115000000	123000000	125000000		1.20667e+08	1.24333e+08	1.03039
Q9VU13;X2JCD3	Q9VU13_DROME;X2JCD3_DROME	EP(3)3622;EP3622	LD45603p	130000000	110000000	125000000	116000000	124000000	118000000	126000000	129000000	121000000	126000000	130000000	129000000		120500000	1.26833e+08	1.05256
Q9VFP1	CP6D5_DROME	Cyp6d5	Probable cytochrome P450 6d5	113000000	127000000	117000000	122000000	126000000	117000000	132000000	125000000	110000000	130000000	145000000	128000000		1.20333e+08	1.28333e+08	1.06648
P19351-3	TNNT_DROME	up	Isoform 3 of Troponin T, skeletal muscle	76700000	198000000	95600000	102000000	81600000	168000000	123000000	82800000	150000000	138000000	60800000	120000000		1.20317e+08	1.12433e+08	0.934478
A0A0B4KG35	A0A0B4KG35_DROME	Strn-Mlck	Stretchin-Mlck, isoform U	107000000	116000000	123000000	125000000	121000000	129000000	121000000	112000000	117000000	118000000	120000000	122000000		1.20167e+08	1.18333e+08	0.984743
Q9VPX0	Q9VPX0_DROME	Iris	GH26159p	145000000	92800000	137000000	122000000	108000000	113000000	89300000	106000000	96300000	96900000	102000000	77500000		1.19633e+08	9.46667e+07	0.791307
P25160	ARL1_DROME	Arl1	ADP-ribosylation factor-like protein 1	115000000	100000000	121000000	134000000	128000000	119000000	117000000	134000000	109000000	123000000	123000000	121000000		119500000	1.21167e+08	1.01395
A0A0B4KH03	A0A0B4KH03_DROME	Tsp96F	Tetraspanin	121000000	129000000	120000000	110000000	105000000	130000000	152000000	120000000	146000000	132000000	138000000	140000000		1.19167e+08	138000000	1.15804
Q0E940	EIF3B_DROME	eIF3b	Eukaryotic translation initiation factor 3 subunit B	110000000	131000000	122000000	113000000	115000000	124000000	137000000	132000000	150000000	146000000	138000000	135000000		1.19167e+08	1.39667e+08	1.17203
Q7KTA1	Q7KTA1_DROME	NimB2	HL01444p	137000000	129000000	85100000	103000000	150000000	110000000	90100000	84700000	75400000	82900000	78300000	72200000		1.19017e+08	80600000	0.677216
M9PCD4;M9PCR7;Q9VM93;M9PC73	M9PC73_DROME;M9PCD4_DROME;M9PCR7_DROME;Q9VM93_DROME	Liprin-alpha	Liprin-alpha, isoform C	113000000	112000000	123000000	128000000	119000000	118000000	147000000	139000000	143000000	140000000	150000000	139000000		1.18833e+08	143000000	1.20337
Q9W3M8	Q9W3M8_DROME	Ykt6	LD34211p	122000000	124000000	116000000	126000000	113000000	109000000	121000000	105000000	123000000	124000000	119000000	118000000		1.18333e+08	1.18333e+08	1
O16130	RL39_DROME	RpL39	Large ribosomal subunit protein eL39	58900000	117000000	131000000	96000000	133000000	173000000	95900000	96600000	117000000	106000000	107000000	103000000		118150000	104250000	0.882353
P48451	CANB1_DROME	CanB	Calcineurin subunit B type 1	114000000	105000000	130000000	128000000	123000000	108000000	130000000	143000000	131000000	129000000	131000000	128000000		118000000	132000000	1.11864
A0A0B4JCT7;B7YZK4;A0A0B4KG78;B7YZK5	A0A0B4JCT7_DROME;A0A0B4KG78_DROME;B7YZK4_DROME;B7YZK5_DROME	Jabba	Jabba, isoform F	127000000	113000000	115000000	113000000	110000000	130000000	216000000	227000000	248000000	260000000	209000000	178000000		118000000	223000000	1.88983
Q9V419	C28A5_DROME	Cyp28a5	Probable cytochrome P450 28a5	99100000	131000000	132000000	115000000	113000000	117000000	139000000	118000000	147000000	151000000	144000000	131000000		117850000	1.38333e+08	1.17381
Q7KSM5	Q7KSM5_DROME	Aos1	SUMO-activating enzyme subunit 1	122000000	108000000	117000000	126000000	121000000	113000000	109000000	117000000	105000000	113000000	111000000	110000000		1.17833e+08	1.10833e+08	0.940594
Q7JVI3	EIF3M_DROME	eIF3m	Eukaryotic translation initiation factor 3 subunit M	136000000	105000000	114000000	114000000	115000000	121000000	103000000	107000000	104000000	109000000	104000000	99000000		117500000	1.04333e+08	0.887943
O16043	O16043_DROME	Df31	Anon1A4	120000000	114000000	117000000	117000000	131000000	106000000	109000000	109000000	106000000	116000000	103000000	121000000		117500000	1.10667e+08	0.941844
P82890	PPAC1_DROME	primo-1	Low molecular weight phosphotyrosine protein phosphatase 1	110000000	124000000	123000000	122000000	122000000	104000000	124000000	108000000	115000000	124000000	116000000	115000000		117500000	117000000	0.995745
Q9VR25	Q9VR25_DROME	fipi	Factor of interpulse interval	116000000	111000000	113000000	119000000	130000000	115000000	116000000	121000000	122000000	117000000	120000000	127000000		1.17333e+08	120500000	1.02699
Q9W0X1	Q9W0X1_DROME	cg2736	GH15894p	124000000	113000000	128000000	109000000	109000000	121000000	130000000	131000000	143000000	133000000	132000000	118000000		1.17333e+08	1.31167e+08	1.1179
A1Z7M8	A1Z7M8_DROME	Ance-4	Angiotensin-converting enzyme	128000000	150000000	108000000	108000000	116000000	93900000	54400000	70100000	64400000	58900000	47600000	65500000		1.17317e+08	60150000	0.512715
Q0KI00	Q0KI00_DROME	SP1029	Aminopeptidase	118000000	119000000	108000000	117000000	127000000	114000000	103000000	107000000	105000000	112000000	107000000	114000000		1.17167e+08	108000000	0.921764
Q7KVL7;Q9W277	Q7KVL7_DROME;Q9W277_DROME	Vps35	Vacuolar protein sorting-associated protein 35	116000000	112000000	121000000	124000000	109000000	121000000	115000000	115000000	109000000	112000000	120000000	112000000		1.17167e+08	1.13833e+08	0.97155
Q5U0V7	Q5U0V7_DROME	Synj	phosphoinositide 5-phosphatase	110000000	115000000	122000000	116000000	121000000	118000000	137000000	134000000	138000000	137000000	139000000	139000000		117000000	1.37333e+08	1.17379
Q0E993	Q0E993_DROME	ValRS	Valine--tRNA ligase	116000000	119000000	118000000	113000000	116000000	119000000	121000000	123000000	117000000	125000000	121000000	114000000		1.16833e+08	1.20167e+08	1.02853
P23625-2	GNAQ_DROME	Galphaq	Isoform A of G protein alpha q subunit	114000000	117000000	120000000	116000000	123000000	111000000	120000000	119000000	122000000	126000000	121000000	132000000		1.16833e+08	1.23333e+08	1.05563
Q9VQG4	COLT_DROME	colt	Congested-like trachea protein	107000000	113000000	132000000	122000000	113000000	114000000	130000000	139000000	127000000	126000000	145000000	127000000		1.16833e+08	1.32333e+08	1.13267
A0A0B4KHL4;A0A0B4K697;A0A0B4K7C4;Q4AB31;Q86BR9;Q86NK8;Q8INB6	A0A0B4K697_DROME;A0A0B4K7C4_DROME;A0A0B4KHL4_DROME;Q4AB31_DROME;Q86BR9_DROME;Q86NK8_DROME;Q8INB6_DROME	gish	non-specific serine/threonine protein kinase	112000000	120000000	122000000	119000000	117000000	110000000	124000000	119000000	137000000	131000000	128000000	133000000		1.16667e+08	1.28667e+08	1.10286
Q9VYV6	Q9VYV6_DROME	BcDNA:LP01642	GEO09033p1	144000000	101000000	118000000	113000000	119000000	104000000	83700000	84500000	72400000	73800000	96700000	91400000		116500000	83750000	0.718884
A1Z877	NDG_DROME	Ndg	Nidogen	120000000	113000000	119000000	116000000	118000000	113000000	119000000	114000000	112000000	120000000	112000000	114000000		116500000	1.15167e+08	0.988555
Q9W1H6	Q9W1H6_DROME	Dmel\CG5597	GH04238p	127000000	113000000	122000000	125000000	114000000	96300000	93000000	96500000	97900000	89600000	84900000	94700000		1.16217e+08	9.27667e+07	0.798222
Q9VLP1	Q9VLP1_DROME	Dmel\CG14275	GEO08095p1	128000000	111000000	120000000	115000000	125000000	97600000	113000000	113000000	113000000	115000000	120000000	110000000		116100000	114000000	0.981912
Q9VH77	Q9VH77_DROME	Mpi	mannose-6-phosphate isomerase	129000000	109000000	118000000	123000000	111000000	106000000	108000000	110000000	108000000	109000000	107000000	103000000		116000000	107500000	0.926724
M9PBV2;Q9VQI8	M9PBV2_DROME;Q9VQI8_DROME	NTPase	NTPase, isoform F	103000000	117000000	121000000	129000000	116000000	110000000	128000000	126000000	123000000	120000000	124000000	120000000		116000000	123500000	1.06466
Q9VVI3-3	NEDD4_DROME	Nedd4	Isoform 3 of E3 ubiquitin-protein ligase Nedd-4	107000000	121000000	120000000	116000000	119000000	113000000	129000000	123000000	130000000	135000000	137000000	128000000		116000000	1.30333e+08	1.12356
Q9VLM8	SYAC_DROME	AlaRS	Alanine--tRNA ligase, cytoplasmic	115000000	112000000	118000000	120000000	115000000	115000000	122000000	130000000	128000000	129000000	124000000	120000000		1.15833e+08	125500000	1.08345
Q9VFT4	Q9VFT4_DROME	rin	AT27578p	114000000	106000000	110000000	113000000	124000000	125000000	88600000	104000000	116000000	110000000	107000000	110000000		1.15333e+08	1.05933e+08	0.918497
Q9W1G7	Q9W1G7_DROME	Nap1	LD21576p	107000000	121000000	115000000	111000000	117000000	118000000	150000000	118000000	148000000	144000000	129000000	133000000		1.14833e+08	137000000	1.19303
Q8I0G5;Q8I0G5-2;Q8I0G5-3	COPG_DROME	gammaCOP	Coatomer subunit gamma	116000000	106000000	110000000	125000000	121000000	110000000	103000000	114000000	98100000	105000000	109000000	104000000		1.14667e+08	1.05517e+08	0.920203
A0A0B4K6E2	A0A0B4K6E2_DROME	Calx	Na/Ca-exchange protein, isoform G	106000000	123000000	115000000	107000000	122000000	115000000	126000000	121000000	135000000	128000000	132000000	129000000		1.14667e+08	128500000	1.12064
P28668	SYEP_DROME	GluProRS	Bifunctional glutamate/proline--tRNA ligase	124000000	109000000	121000000	106000000	109000000	116000000	102000000	109000000	99100000	101000000	104000000	98000000		1.14167e+08	1.02183e+08	0.895036
Q94519	ACPM_DROME	ND-ACP	Acyl carrier protein, mitochondrial	100000000	121000000	111000000	114000000	116000000	123000000	125000000	135000000	127000000	116000000	123000000	128000000		1.14167e+08	1.25667e+08	1.10073
P40320	METK_DROME	Sam-S	S-adenosylmethionine synthase	136000000	125000000	119000000	105000000	95500000	104000000	76400000	92000000	81400000	87700000	88700000	82800000		1.14083e+08	8.48333e+07	0.743608
Q9VVE5	MSIR6_DROME	Rbp6	RNA-binding protein Musashi homolog Rbp6	114000000	102000000	114000000	110000000	128000000	116000000	105000000	110000000	118000000	109000000	113000000	114000000		114000000	111500000	0.97807
Q9VL78	FKB59_DROME	Fkbp59	FK506-binding protein 59	115000000	118000000	111000000	107000000	112000000	120000000	110000000	104000000	115000000	112000000	108000000	104000000		1.13833e+08	1.08833e+08	0.956076
O97061	O97061_DROME	Ccp84Ad	Ccp84Ad	61900000	69400000	155000000	164000000	121000000	111000000	115000000	137000000	64500000	62700000	80300000	116000000		1.13717e+08	9.59167e+07	0.843471
Q9I7D3	CAPR1_DROME	Capr	Caprin homolog	116000000	111000000	95100000	121000000	118000000	121000000	75700000	95600000	118000000	125000000	120000000	115000000		1.13683e+08	1.08217e+08	0.951913
Q9VV60	Q9VV60_DROME	TyrRS	Tyrosine--tRNA ligase	112000000	113000000	117000000	108000000	115000000	117000000	125000000	130000000	125000000	123000000	134000000	123000000		1.13667e+08	1.26667e+08	1.11437
A8DZ29;O61380	A8DZ29_DROME;O61380_DROME	eIF4G1	Eukaryotic translation initiation factor 4G1, isoform B	110000000	113000000	117000000	113000000	110000000	118000000	109000000	109000000	111000000	111000000	108000000	107000000		113500000	1.09167e+08	0.961821
Q0KI98	Q0KI98_DROME	TrpRS	tryptophan--tRNA ligase	121000000	102000000	114000000	115000000	117000000	106000000	108000000	109000000	104000000	106000000	112000000	102000000		112500000	1.06833e+08	0.94963
P18824;P18824-2	ARM_DROME	arm	Armadillo segment polarity protein	109000000	110000000	126000000	125000000	100000000	104000000	109000000	111000000	106000000	110000000	109000000	102000000		1.12333e+08	1.07833e+08	0.959941
Q9VU75	Q9VU75_DROME	Dmel\CG14109	RH45712p	114000000	113000000	110000000	111000000	106000000	118000000	107000000	95600000	103000000	105000000	104000000	110000000		112000000	104100000	0.929464
P05990	PYR1_DROME	r	Multifunctional protein r	115000000	102000000	115000000	114000000	109000000	115000000	113000000	129000000	109000000	113000000	111000000	104000000		1.11667e+08	1.13167e+08	1.01343
Q9VTB3	Q9VTB3_DROME	oya	guanylate kinase	122000000	107000000	111000000	117000000	114000000	98900000	105000000	108000000	107000000	108000000	101000000	119000000		111650000	108000000	0.967309
P54353	DOD_DROME	dod	Putative peptidyl-prolyl cis-trans isomerase dodo	103000000	109000000	107000000	116000000	117000000	117000000	121000000	137000000	133000000	136000000	130000000	137000000		111500000	1.32333e+08	1.18685
A0A0B4KFZ4;O76137	A0A0B4KFZ4_DROME;O76137_DROME	TM4SF	Transmembrane 4 superfamily, isoform C	117000000	116000000	116000000	100000000	107000000	113000000	173000000	130000000	136000000	129000000	128000000	125000000		111500000	1.36833e+08	1.2272
A1Z803	A1Z803_DROME	Marc	FI02892p	118000000	110000000	120000000	114000000	109000000	97300000	105000000	104000000	98700000	115000000	101000000	108000000		1.11383e+08	1.05283e+08	0.945234
Q9VH07	RUVB1_DROME	pont	RuvB-like helicase 1	113000000	104000000	107000000	116000000	111000000	116000000	109000000	115000000	121000000	123000000	120000000	116000000		1.11167e+08	1.17333e+08	1.05547
Q8I725	Q8I725_DROME	Dmel\CG1236	Uncharacterized protein	105000000	113000000	111000000	111000000	106000000	120000000	108000000	109000000	117000000	113000000	114000000	112000000		111000000	1.12167e+08	1.01051
Q9VMH9	Q9VMH9_DROME	Dmel\CG9150	Uncharacterized protein	114000000	99600000	112000000	125000000	113000000	102000000	100000000	101000000	87900000	93300000	93000000	99300000		1.10933e+08	95750000	0.863131
Q868Z9	PPN_DROME	Ppn	Papilin	120000000	109000000	92500000	108000000	130000000	105000000	99800000	108000000	94000000	106000000	97800000	109000000		110750000	1.02433e+08	0.924906
Q9VXH7	Q9VXH7_DROME	Dmel\CG9917	FI17510p1	132000000	98400000	111000000	119000000	112000000	91800000	89800000	87300000	79600000	80600000	91400000	120000000		110700000	91450000	0.826107
Q9VWT1	Q9VWT1_DROME	HisRS	histidine--tRNA ligase	104000000	110000000	110000000	110000000	121000000	109000000	109000000	112000000	110000000	110000000	109000000	108000000		1.10667e+08	1.09667e+08	0.990964
Q9VW56	PFD6_DROME	Pfdn6	Probable prefoldin subunit 6	114000000	106000000	118000000	112000000	111000000	102000000	106000000	106000000	119000000	114000000	108000000	113000000		110500000	111000000	1.00452
Q9VJC7	EFTS_DROME	mEFTs	Elongation factor Ts, mitochondrial	105000000	115000000	109000000	106000000	111000000	116000000	116000000	111000000	111000000	117000000	106000000	126000000		1.10333e+08	114500000	1.03776
E1JJK6	E1JJK6_DROME	rdgB	Retinal degeneration B, isoform H	112000000	119000000	106000000	99600000	110000000	111000000	111000000	108000000	116000000	121000000	116000000	116000000		109600000	1.14667e+08	1.04623
Q7K4Q5	Y0417_DROME	CG10417	Probable protein phosphatase CG10417	115000000	105000000	106000000	116000000	109000000	106000000	108000000	110000000	109000000	108000000	113000000	107000000		109500000	1.09167e+08	0.996956
A1Z6V5	A1Z6V5_DROME	Spn43Ab	FI01422p	124000000	113000000	93800000	96900000	123000000	106000000	95500000	98400000	87700000	95800000	82500000	96100000		109450000	9.26667e+07	0.846658
P08120	CO4A1_DROME	Col4a1	Collagen alpha-1(IV) chain	95300000	107000000	79300000	81200000	152000000	140000000	102000000	117000000	139000000	199000000	107000000	139000000		1.09133e+08	1.33833e+08	1.22633
P18431;P18431-3	SGG_DROME	sgg	Protein kinase shaggy	125000000	99200000	109000000	112000000	114000000	94200000	83500000	106000000	93400000	105000000	85700000	105000000		108900000	9.64333e+07	0.885522
Q9W2J5	Q9W2J5_DROME	Dmel\CG44245	Uncharacterized protein, isoform A	100000000	112000000	102000000	109000000	121000000	109000000	103000000	102000000	101000000	102000000	97500000	110000000		1.08833e+08	1.02583e+08	0.942573
P83097	WSCK_DROME	Wsck	Putative inactive tyrosine-protein kinase Wsck	120000000	106000000	109000000	113000000	105000000	99600000	104000000	117000000	98900000	109000000	106000000	110000000		1.08767e+08	1.07483e+08	0.988201
Q9VYT6	Q9VYT6_DROME	p24-1	RE49489p	97400000	110000000	107000000	107000000	104000000	127000000	124000000	109000000	135000000	137000000	122000000	131000000		1.08733e+08	1.26333e+08	1.16186
Q8MMC4	CDV3_DROME	CG3760	Protein CDV3 homolog	102000000	109000000	108000000	105000000	114000000	114000000	100000000	107000000	110000000	113000000	106000000	94200000		1.08667e+08	1.05033e+08	0.966564
Q9VKQ5	Q9VKQ5_DROME	Dmel\CG17124	GEO07393p1	102000000	114000000	101000000	118000000	101000000	116000000	80100000	96300000	136000000	135000000	134000000	87600000		1.08667e+08	111500000	1.02607
Q9W3N7	Q9W3N7_DROME	ND-MNLL	NADH dehydrogenase [ubiquinone] 1 beta subcomplex subunit 1	59300000	139000000	102000000	85000000	87500000	179000000	161000000	84700000	160000000	183000000	132000000	125000000		1.08633e+08	140950000	1.29748
Q9VG82	CP9F2_DROME	Cyp9f2	Probable cytochrome P450 9f2	113000000	103000000	114000000	111000000	109000000	101000000	114000000	117000000	111000000	110000000	116000000	119000000		108500000	114500000	1.0553
Q24114	DALY_DROME	dally	Division abnormally delayed protein	120000000	105000000	104000000	106000000	115000000	98100000	83900000	101000000	83600000	85300000	92400000	97200000		1.08017e+08	9.05667e+07	0.838451
Q9V7Y2	SGPL_DROME	Sply	Sphingosine-1-phosphate lyase	105000000	101000000	115000000	100000000	106000000	121000000	124000000	122000000	121000000	132000000	134000000	120000000		108000000	125500000	1.16204
P39205	CIN_DROME	cin	Molybdenum cofactor synthesis protein cinnamon	104000000	98700000	131000000	99100000	97200000	114000000	123000000	110000000	134000000	136000000	128000000	110000000		1.07333e+08	123500000	1.15062
P06002	OPS1_DROME	ninaE	Opsin Rh1	143000000	98500000	137000000	111000000	83600000	70000000	78300000	93200000	53100000	57700000	75600000	68000000		1.07183e+08	7.09833e+07	0.662261
A8DYP0	OBSCN_DROME	Unc-89	Obscurin	103000000	113000000	105000000	102000000	109000000	108000000	106000000	107000000	108000000	103000000	102000000	110000000		1.06667e+08	106000000	0.99375
Q8MYV9	Q8MYV9_DROME	BcDNA:RH08259	GEO12865p1	127000000	60300000	122000000	122000000	101000000		73500000			25900000	68800000	82900000		106460000	62775000	0.589658
P36951	HYI_DROME	Gip	Putative hydroxypyruvate isomerase	125000000	104000000	108000000	107000000	97300000	97000000	98600000	120000000	99300000	106000000	115000000	95300000		1.06383e+08	105700000	0.993577
Q961Q8	Q961Q8_DROME	Dmel\CG10562	GH10454p	114000000	105000000	113000000	97700000	113000000	93800000	101000000	94300000	95600000	94100000	103000000	99200000		1.06083e+08	9.78667e+07	0.922545
P40793	CDC42_DROME	Cdc42	Cdc42 homolog	106000000	100000000	108000000	111000000	109000000	102000000	98800000	108000000	102000000	97000000	97000000	107000000		106000000	1.01633e+08	0.958805
A0A6H2EDG9;Q9W3D6	A0A6H2EDG9_DROME;Q9W3D6_DROME	Dmel\CG12065	Uncharacterized protein, isoform G	103000000	103000000	96400000	115000000	109000000	109000000	107000000	113000000	109000000	114000000	120000000	121000000		105900000	114000000	1.07649
P12080;P12080-2	ITA2_DROME	if	Integrin alpha-PS2	113000000	106000000	99700000	111000000	108000000	97600000	102000000	97400000	101000000	103000000	98800000	107000000		1.05883e+08	1.01533e+08	0.958917
Q9VD00	Q9VD00_DROME	Dmel\CG5377	FI07666p	106000000	111000000	107000000	104000000	105000000	102000000	109000000	109000000	109000000	114000000	115000000	115000000		1.05833e+08	1.11833e+08	1.05669
C0HLZ9;C0HM00	BARA1_DROME;BARA2_DROME	BaraA1;BaraA2	Baramicin A1	73400000	127000000	90400000	81200000	153000000	109000000	246000000	108000000	160000000	111000000	125000000	146000000		1.05667e+08	1.49333e+08	1.41325
D3DML3;M9NEC0;M9PF42;Q9VLT9	D3DML3_DROME;M9NEC0_DROME;M9PF42_DROME;Q9VLT9_DROME	Cka	Connector of kinase to AP-1, isoform E	114000000	101000000	103000000	94100000	110000000	111000000	105000000	87400000	106000000	98300000	96800000	92400000		1.05517e+08	97650000	0.925446
Q9W445	MCTS1_DROME	MCTS1	Malignant T-cell-amplified sequence 1 homolog	118000000	108000000	118000000	97900000	102000000	88000000	111000000	113000000	113000000	112000000	118000000	129000000		1.05317e+08	116000000	1.10144
M9PAZ4;Q59E11;Q9VPV8	M9PAZ4_DROME;Q59E11_DROME;Q9VPV8_DROME	IA-2	IA-2 protein tyrosine phosphatase, isoform E	107000000	99300000	114000000	110000000	102000000	98100000	108000000	108000000	110000000	110000000	117000000	107000000		1.05067e+08	110000000	1.04695
Q9V3H2	PSDE_DROME	Rpn11	26S proteasome non-ATPase regulatory subunit 14	118000000	93200000	108000000	117000000	104000000	89800000	85100000	103000000	90500000	86700000	91300000	95100000		105000000	91950000	0.875714
Q9VKR4	Q9VKR4_DROME	Dmel\CG6415	Aminomethyltransferase	111000000	90100000	114000000	97500000	105000000	112000000	72600000	79600000	86800000	78200000	84200000	72800000		1.04933e+08	7.90333e+07	0.753177
Q24524	SING_DROME	sn	Protein singed	103000000	112000000	105000000	101000000	105000000	103000000	105000000	108000000	111000000	121000000	116000000	111000000		1.04833e+08	112000000	1.06836
A0A6H2EIE0;A0A6H2EJK0	A0A6H2EIE0_DROME;A0A6H2EJK0_DROME	Eaat1	Amino acid transporter	106000000	102000000	113000000	114000000	104000000	88500000	108000000	117000000	102000000	93400000	111000000	112000000		1.04583e+08	1.07233e+08	1.02534
A1Z6X6	A1Z6X6_DROME	Glo1	lactoylglutathione lyase	102000000	107000000	111000000	119000000	98900000	87300000	118000000	114000000	101000000	103000000	105000000	115000000		104200000	1.09333e+08	1.04926
Q9VKY2	CAND1_DROME	Cand1	Cullin-associated NEDD8-dissociated protein 1	111000000	106000000	104000000	105000000	97900000	101000000	105000000	95600000	99000000	99400000	97400000	103000000		104150000	99900000	0.959193
Q9W0Y6	PAIN_DROME	pain	Transient receptor potential cation channel protein painless	105000000	101000000	105000000	117000000	96600000	98700000	125000000	103000000	134000000	122000000	120000000	129000000		1.03883e+08	1.22167e+08	1.176
Q9W5B4	Q9W5B4_DROME	EG:103E12.2	GH18858p	93100000	123000000	105000000	89600000	110000000	102000000	85700000	96000000	80700000	86000000	86300000	80500000		1.03783e+08	8.58667e+07	0.827365
O61722	PRL1_DROME	PRL-1	PRL-1 phosphatase	98000000	114000000	111000000	87100000	96400000	114000000	147000000	127000000	167000000	148000000	150000000	134000000		1.03417e+08	145500000	1.40693
Q9VMT5	C28D1_DROME	Cyp28d1	Probable cytochrome P450 28d1	86600000	108000000	112000000	95600000	103000000	112000000	110000000	99400000	101000000	106000000	106000000	96700000		1.02867e+08	1.03183e+08	1.00308
P40797	PNUT_DROME	pnut	Protein peanut	98200000	102000000	101000000	103000000	105000000	108000000	111000000	103000000	110000000	102000000	112000000	111000000		1.02867e+08	1.08167e+08	1.05152
P04388	RAS2_DROME	Ras64B	Ras-like protein 2	104000000	108000000	99000000	93800000	101000000	111000000	118000000	100000000	113000000	117000000	109000000	112000000		102800000	111500000	1.08463
Q9VYU9	Q9VYU9_DROME	Dmel\CG9360	RH17287p	107000000	101000000	103000000	103000000	99900000	101000000	116000000	109000000	109000000	105000000	117000000	101000000		1.02483e+08	109500000	1.06847
Q8IQ51	Q8IQ51_DROME	Dmel\CG32523	IP21943p	111000000	108000000	106000000	129000000	71000000	87900000	58100000	53500000	62000000	76500000	65700000	63500000		102150000	6.32167e+07	0.618861
Q7KV94	Q7KV94_DROME	CG16760	Purine nucleoside phosphorylase	111000000	86000000	131000000	110000000	86700000	88100000	96800000	116000000	90300000	92300000	96700000	86700000		1.02133e+08	9.64667e+07	0.944517
Q9V3Y7	Q9V3Y7_DROME	BG:DS01759.2	Uncharacterized protein, isoform A	115000000	111000000	85400000	86100000	122000000	92600000	88200000	85700000	75400000	73300000	70700000	76100000		1.02017e+08	7.82333e+07	0.766868
Q9V9X4	MTNA_DROME	CG11334	Methylthioribose-1-phosphate isomerase	104000000	87600000	104000000	95500000	113000000	108000000	102000000	120000000	106000000	110000000	118000000	107000000		1.02017e+08	110500000	1.08316
Q8IN49	Q8IN49_DROME	Dmel\CG31195	MIP05539p	101000000	107000000	98600000	95900000	102000000	107000000	105000000	107000000	108000000	111000000	108000000	108000000		1.01917e+08	1.07833e+08	1.05805
P41375	IF2B_DROME	eIF2beta	Eukaryotic translation initiation factor 2 subunit 2	115000000	96100000	120000000	101000000	92000000	87100000	88100000	94800000	76100000	88400000	86000000	85300000		1.01867e+08	86450000	0.848658
Q7K3E2	Q7K3E2_DROME	Dmel\CG5080	LD34147p	111000000	106000000	94200000	99900000	105000000	93600000	93100000	101000000	102000000	89400000	84400000	97100000		1.01617e+08	94500000	0.929966
Q9VW26	OAT_DROME	Oat	Ornithine aminotransferase, mitochondrial	97400000	90000000	117000000	101000000	102000000	102000000	96600000	88000000	95100000	108000000	111000000	90700000		1.01567e+08	9.82333e+07	0.967181
Q9W415	WUHO_DROME	wuho	tRNA (guanine-N(7)-)-methyltransferase non-catalytic subunit wuho	106000000	90900000	102000000	102000000	101000000	107000000	108000000	109000000	110000000	110000000	103000000	109000000		1.01483e+08	1.08167e+08	1.06586
Q9VHS8	IF4A3_DROME	CG7483	Eukaryotic initiation factor 4A-III	96800000	105000000	99100000	101000000	100000000	107000000	117000000	109000000	106000000	105000000	102000000	122000000		1.01483e+08	1.10167e+08	1.08556
Q9VI04	Q9VI04_DROME	pyd3	Beta-alanine synthase	98900000	100000000	112000000	99100000	100000000	98700000	90500000	100000000	83400000	83800000	85700000	94700000		101450000	8.96833e+07	0.884015
A1ZA97	A1ZA97_DROME	Jhedup	Carboxylic ester hydrolase	86100000	114000000	102000000	97100000	106000000	103000000	112000000	104000000	92600000	93700000	100000000	93700000		1.01367e+08	9.93333e+07	0.979941
Q9VTN9	Q9VTN9_DROME	Gcat	FI03238p	96900000	112000000	108000000	93300000	94900000	103000000	85800000	93400000	91500000	96500000	98300000	75000000		101350000	9.00833e+07	0.888834
Q9VLW1	Q9VLW1_DROME	lectin-28C	Lectin type C	108000000	123000000	87400000	89600000	97100000	103000000	86100000	97000000	102000000	102000000	86000000	86600000		101350000	9.32833e+07	0.920408
Q08012	GRAP_DROME	drk	Growth factor receptor-bound protein 2	109000000	111000000	108000000	104000000	96200000	79300000	112000000	98600000	112000000	122000000	109000000	126000000		101250000	1.13267e+08	1.11868
P11996	LSP1B_DROME	Lsp1beta	Larval serum protein 1 beta chain	97300000	126000000	99400000	99400000	95800000	88500000	110000000	111000000	125000000	105000000	91000000	91300000		1.01067e+08	105550000	1.04436
Q9VLL3-2	AK200_DROME	Akap200	Isoform B of A-kinase anchor protein 200	102000000	96600000	99400000	116000000	115000000	77200000	58800000	81300000	55900000	78600000	77500000	57300000		1.01033e+08	6.82333e+07	0.675355
Q9V9V4	Q9V9V4_DROME	Dmel\CG11550	CRAL-TRIO domain-containing protein	107000000	96500000	108000000	108000000	100000000	86300000	110000000	100000000	99100000	105000000	109000000	106000000		1.00967e+08	104850000	1.03846
Q9VMY9	GUAD_DROME	DhpD	Guanine deaminase	117000000	97500000	105000000	96100000	93900000	92700000	92700000	101000000	92400000	96600000	91100000	91400000		1.00367e+08	94200000	0.938559
Q9V668;Q9VWE9	S61G1_DROME;S61G2_DROME	SEC61G1;Sec61gamma	Protein transport protein Sec61 gamma-1 subunit	101000000	85000000	146000000	133000000	60100000	76400000	85600000	125000000	46800000	60600000	86400000	54800000		100250000	7.65333e+07	0.763425
Q9VRD4	Q9VRD4_DROME	Dmel\CG1532	Uncharacterized protein, isoform A	101000000	93500000	97300000	113000000	106000000	90700000	81200000	92300000	87600000	88200000	88100000	96100000		100250000	8.89167e+07	0.886949
Q9VSL9	Q9VSL9_DROME	Dmel\CG6638	Isovaleryl-CoA dehydrogenase, mitochondrial	101000000	96100000	106000000	100000000	94400000	103000000	89100000	94200000	87400000	88800000	94700000	81500000		1.00083e+08	8.92833e+07	0.89209
Q9VW66	Q9VW66_DROME	Dmel\CG7646	Uncharacterized protein, isoform A	126000000	84700000	112000000	100000000	98200000	79600000	98200000	117000000	97200000	97100000	105000000	99600000		1.00083e+08	102350000	1.02265
A0A0B4K6S8;Q9VNA2	A0A0B4K6S8_DROME;Q9VNA2_DROME	mtd	Oxidation resistance protein 1	98100000	101000000	99200000	97900000	102000000	102000000	100000000	108000000	108000000	98200000	101000000	107000000		1.00033e+08	103700000	1.03665
Q7JWD3	ASNA_DROME	CG1598	ATPase ASNA1 homolog	103000000	91800000	104000000	106000000	103000000	91700000	83600000	98900000	91200000	89400000	89700000	94800000		9.99167e+07	9.12667e+07	0.913428
Q7JW03	Q7JW03_DROME	UbcE2H	E2 ubiquitin-conjugating enzyme	106000000	95500000	98900000	93600000	103000000	102000000	94200000	96500000	102000000	108000000	106000000	89100000		9.98333e+07	99300000	0.994658
Q9VHN4	Q9VHN4_DROME	Dmel\CG8043	GH14121p	107000000	90300000	111000000	108000000	96200000	86400000	78000000	88800000	70000000	65200000	66300000	79100000		9.98167e+07	7.45667e+07	0.747036
Q9V9Q4	Q9V9Q4_DROME	Dmel\CG1416	LD43819p	99300000	94300000	104000000	101000000	97000000	101000000	99700000	94100000	96700000	97600000	99500000	92900000		9.94333e+07	96750000	0.973014
B7YZE0	B7YZE0_DROME	CAP	CAP, isoform P	72900000	99800000	105000000	96800000	115000000	107000000		100000000						9.94167e+07	100000000	1.00587
A8JV25;Q9VXA5	A8JV25_DROME;Q9VXA5_DROME	Dmel\CG4829	Uncharacterized protein, isoform D	92000000	100000000	98400000	102000000	104000000	100000000	110000000	109000000	93800000	105000000	109000000	118000000		99400000	1.07467e+08	1.08115
Q9VND8	RHEB_DROME	Rheb	GTP-binding protein Rheb homolog	100000000	93200000	102000000	102000000	108000000	90700000	117000000	117000000	105000000	116000000	118000000	121000000		9.93167e+07	1.15667e+08	1.16462
A1Z7V9	A1Z7V9_DROME	Nt5c	FI20020p1	103000000	93600000	102000000	97500000	102000000	97700000	101000000	113000000	105000000	110000000	107000000	110000000		99300000	1.07667e+08	1.08426
P14484	CUPP_DROME	Pcp	Pupal cuticle protein	119000000	81400000	92100000	102000000	97000000	104000000	85300000	73500000	75500000	93400000	78800000	81300000		99250000	81300000	0.819144
Q8SY96	NFU1_DROME	CG32500	NFU1 iron-sulfur cluster scaffold homolog, mitochondrial	95700000	89800000	95200000	104000000	102000000	107000000	105000000	107000000	118000000	120000000	117000000	127000000		98950000	1.15667e+08	1.16894
Q9VM10	Q9VM10_DROME	santa-maria	Scavenger receptor acting in neural tissue and majority of rhodopsin is absent, isoform A	102000000	92000000	105000000	93900000	104000000	96700000	107000000	112000000	115000000	115000000	107000000	122000000		9.89333e+07	113000000	1.14218
Q8IQE6	Q8IQE6_DROME	IRSp53	Insulin receptor substrate 53 kDa, isoform A	105000000	97100000	91800000	94500000	99500000	103000000	98500000	110000000	102000000	98400000	102000000	107000000		9.84833e+07	1.02983e+08	1.04569
Q9W2J4	Q9W2J4_DROME	Ugt49B1	UDP-glucuronosyltransferase	104000000	95200000	120000000	89800000	89400000	91900000	97500000	103000000	94100000	97000000	107000000	97400000		9.83833e+07	9.93333e+07	1.00966
Q961R9	Q961R9_DROME	CT19169	GH09241p	98100000	92100000	97600000	106000000	101000000	94500000	99400000	97000000	104000000	100000000	93800000	111000000		9.82167e+07	1.00867e+08	1.02698
Q9W347;M9PHH0	M9PHH0_DROME;Q9W347_DROME	c12.2	C12.2, isoform B	100000000	94700000	101000000	99400000	97600000	95800000	96300000	100000000	96000000	105000000	102000000	98900000		9.80833e+07	99700000	1.01648
Q9VCZ8	PFD5_DROME	Pfdn5	Probable prefoldin subunit 5	108000000	94400000	96100000	96200000	89000000	104000000	93900000	89400000	100000000	98500000	89400000	91600000		97950000	93800000	0.957631
Q9VKM7	Q9VKM7_DROME	Tmem214	AT01533p	82700000	78300000	158000000	115000000	74000000	78300000	86000000	82100000	49000000	63400000	63500000	70600000		9.77167e+07	69100000	0.707147
O76752	O76752_DROME	Sptr	Sepiapterin reductase	109000000	95200000	96600000	102000000	94600000	88700000	82300000	85400000	74200000	84300000	77300000	87900000		9.76833e+07	81900000	0.838423
Q95RY2;Q9VUQ1	Q95RY2_DROME;Q9VUQ1_DROME	BAG2;CG17014	LD01461p	108000000	91800000	93500000	104000000	98900000	89600000	77700000	94700000	86700000	81200000	84000000	84800000		9.76333e+07	84850000	0.869068
P05205	HP1_DROME	Su(var)205	Heterochromatin protein 1	107000000	85100000	92200000	104000000	106000000	91300000	92600000	101000000	95700000	98300000	88900000	89300000		97600000	94300000	0.966189
O61443	MK38B_DROME	p38b	Mitogen-activated protein kinase p38b	93300000	85100000	99100000	108000000	101000000	98700000	86000000	79100000	94100000	95400000	94100000	95400000		9.75333e+07	9.06833e+07	0.929768
Q9VIM0	Q9VIM0_DROME	38C.55	GH14278p	107000000	110000000	95100000	116000000	82300000	74200000	89700000	80000000	110000000	100000000	104000000	114000000		9.74333e+07	9.96167e+07	1.02241
A0A0B4K6X5	A0A0B4K6X5_DROME	Dmel\CG43093	Uncharacterized protein	106000000	86100000	92200000	107000000	88100000	104000000	78600000	75200000	72800000	75500000	70000000	74700000		9.72333e+07	7.44667e+07	0.765855
P33438	GLT_DROME	Glt	Glutactin	97400000	113000000	76400000	81200000	104000000	111000000	100000000	97300000	120000000	130000000	99500000	107000000		9.71667e+07	1.08967e+08	1.12144
Q9W254	Q9W254_DROME	qkr58E-2	Quaking related 58E-2, isoform A	96000000	102000000	93200000	94200000	97700000	99700000	98300000	94800000	90800000	99900000	96900000	107000000		9.71333e+07	97950000	1.00841
Q7K127	Q7K127_DROME	CT24026	Alpha-galactosidase	103000000	98600000	89400000	96400000	105000000	89800000	57700000	74100000	59800000	69200000	59800000	69000000		9.70333e+07	6.49333e+07	0.669186
A1A701	A1A701_DROME	Dmel\CG34138	IP17336p	101000000	97300000	114000000	109000000	69600000	91000000	152000000	107000000	112000000	113000000	116000000	104000000		9.69833e+07	1.17333e+08	1.20983
A0A6H2EFG8	A0A6H2EFG8_DROME	rdgA	Diacylglycerol kinase	119000000	109000000	66600000	103000000	105000000	77700000	91600000	75200000	88600000	90300000	91000000	80100000		9.67167e+07	8.61333e+07	0.890574
Q9VMF1	Q9VMF1_DROME	Dmel\CG9497	Uncharacterized protein, isoform A	94900000	97800000	100000000	105000000	88300000	94300000	110000000	105000000	108000000	107000000	97500000	117000000		9.67167e+07	1.07417e+08	1.11063
Q9VJJ0	Q9VJJ0_DROME	Prosbeta4	Proteasome subunit beta	89300000	108000000	91300000	85300000	96900000	109000000	105000000	87400000	111000000	97200000	94600000	94400000		9.66333e+07	9.82667e+07	1.0169
Q9W404	Q9W404_DROME	Dmel\CG3842	GH10714p	92900000	97500000	105000000	101000000	94700000	88600000	89800000	95400000	89600000	93900000	90400000	106000000		9.66167e+07	9.41833e+07	0.974815
Q9W5N0	COA7_DROME	Coa7	Cytochrome c oxidase assembly factor 7 homolog	110000000	88000000	99400000	102000000	95700000	84400000	81100000	84800000	74900000	79000000	77400000	86200000		9.65833e+07	8.05667e+07	0.834167
Q9VZI3	UN112_DROME	Fit1	Unc-112-related protein	89000000	99200000	99600000	99800000	102000000	89400000	89900000	96300000	95700000	95300000	98500000	97900000		96500000	95600000	0.990674
M9PC99	M9PC99_DROME	Sec24CD	Secretory 24CD, isoform C	95600000	95600000	94400000	97300000	93200000	102000000	93000000	97500000	96500000	90300000	105000000	89500000		96350000	95300000	0.989102
P34082	FAS2_DROME	Fas2	Fasciclin-2	93100000	97700000	94600000	91000000	101000000	99200000	100000000	88800000	102000000	96000000	98900000	98100000		96100000	97300000	1.01249
Q9VDC0	Q9VDC0_DROME	FOHSDR	GH01837p	101000000	92100000	96400000	99400000	100000000	86600000	99500000	112000000	103000000	95100000	107000000	93600000		9.59167e+07	101700000	1.0603
Q9Y164	Q9Y164_DROME	BcDNA.GH02439	BcDNA.GH02439	114000000	120000000	66700000	91400000	83600000	97700000	162000000	107000000	107000000	164000000	159000000	141000000		9.55667e+07	140000000	1.46495
Q9W1X5	Q9W1X5_DROME	nahoda	GH04942p	89600000	103000000	93900000	92300000	95900000	97800000	111000000	104000000	112000000	112000000	107000000	108000000		9.54167e+07	109000000	1.14236
Q9VTZ5	TRFM_DROME	Tsf2	Transferrin 2	104000000	92400000	92200000	100000000	91500000	92300000	97300000	97200000	94100000	98600000	95100000	102000000		95400000	9.73833e+07	1.02079
O77410	EIF3E_DROME	eIF3e	Eukaryotic translation initiation factor 3 subunit E	89400000	95600000	95000000	95400000	90900000	103000000	97800000	87100000	95100000	89400000	91100000	88900000		9.48833e+07	9.15667e+07	0.965045
Q9VGJ9	Q9VGJ9_DROME	Ho	Heme oxygenase	91500000	98000000	93500000	93500000	96300000	95600000	108000000	93000000	114000000	105000000	105000000	105000000		9.47333e+07	105000000	1.10837
X2JC79;Q7KUX7	Q7KUX7_DROME;X2JC79_DROME	eIF4H1	Eukaryotic translation initiation factor 4H	95600000	76600000	89000000	107000000	99800000	100000000	81400000	92500000	78700000	91600000	88100000	105000000		9.46667e+07	89550000	0.945951
Q9VCD9	Q9VCD9_DROME	BcDNA:RE30346	Uncharacterized protein, isoform C	97400000	87200000	90400000	95000000	97800000	100000000	98700000	96400000	95700000	108000000	102000000	99800000		9.46333e+07	100100000	1.05777
Q9VCA5	SYFB_DROME	beta-PheRS	Phenylalanine--tRNA ligase beta subunit	96100000	88100000	96000000	94500000	97300000	95000000	80700000	81300000	87900000	87900000	87200000	81200000		94500000	8.43667e+07	0.892769
Q9Y162	Q9Y162_DROME	Vps4	BcDNA.GH02678	93400000	89600000	96500000	95900000	96700000	92400000	92400000	96500000	98900000	92100000	96300000	99400000		9.40833e+07	9.59333e+07	1.01966
Q8IQ63;Q26459;Q9VRM5	Q26459_DROME;Q8IQ63_DROME;Q9VRM5_DROME	Msr-110	EN protein binding protein	84500000	94700000	97300000	101000000	96100000	90700000	104000000	94500000	106000000	108000000	105000000	103000000		94050000	1.03417e+08	1.09959
Q9VGU6	Q9VGU6_DROME	Ak3	GTP:AMP phosphotransferase, mitochondrial	88800000	88900000	96800000	93300000	98900000	97300000	105000000	99500000	97900000	108000000	101000000	111000000		94000000	1.03733e+08	1.10355
P11584	ITBX_DROME	mys	Integrin beta-PS	112000000	93100000	87100000	94400000	90600000	85900000	91000000	88000000	82300000	91500000	93100000	89600000		93850000	89250000	0.950986
A0A0B4KEE5	A0A0B4KEE5_DROME	M7BP	Uncharacterized protein, isoform Q	95900000	91200000	88700000	96100000	104000000	86400000	84900000	85400000	91000000	87300000	94300000	89900000		9.37167e+07	88800000	0.947537
Q24537;Q24537-2;Q24537-3	HMG2_DROME	Dsp1	High mobility group protein DSP1	73000000	106000000	92600000	91800000	104000000	94600000	128000000	114000000	148000000	126000000	130000000	132000000		9.36667e+07	1.29667e+08	1.38434
Q9VSL8	Q9VSL8_DROME	rhea	Rhea, isoform B	94400000	90400000	91500000	93100000	96200000	94900000	90100000	90400000	92300000	93300000	92800000	89700000		9.34167e+07	9.14333e+07	0.978769
M9PE54;Q9VQB3	M9PE54_DROME;Q9VQB3_DROME	BVRA	Trans-1,2-dihydrobenzene-1,2-diol dehydrogenase	96700000	80900000	113000000	84600000	89200000	95800000	79200000	81900000	84400000	94700000	86900000	74000000		9.33667e+07	8.35167e+07	0.894502
Q95RV5	Q95RV5_DROME	Rpe	Ribulose-phosphate 3-epimerase	92100000	86200000	94100000	91100000	87600000	108000000	101000000	97200000	101000000	96500000	95700000	93900000		9.31833e+07	97550000	1.04686
Q9VKC8	Q9VKC8_DROME	Tom70	FI03495p	93900000	95200000	89900000	90700000	95900000	93500000	106000000	99100000	104000000	99200000	105000000	93700000		9.31833e+07	1.01167e+08	1.08567
Q9V535	RBM8A_DROME	tsu	RNA-binding protein 8A	98800000	91200000	88800000	94900000	97200000	87100000	100000000	94200000	92200000	98100000	93400000	92700000		93000000	95100000	1.02258
Q9V428	Q9V428_DROME	ics	Icarus, isoform A	94200000	89800000	94200000	97800000	92600000	89200000	85000000	91000000	85600000	87500000	84100000	93000000		9.29667e+07	87700000	0.943349
A1ZAI5	FACR1_DROME	CG5065	Putative fatty acyl-CoA reductase CG5065	93800000	86300000	100000000	100000000	96300000	81100000	84500000	113000000	93300000	102000000	95300000	110000000		9.29167e+07	9.96833e+07	1.07283
Q9VB05	Q9VB05_DROME	ALiX	ALG-2 interacting protein X	92500000	94100000	94300000	94200000	88700000	93500000	102000000	101000000	102000000	101000000	102000000	92900000		9.28833e+07	100150000	1.07823
Q9VAG3	Q9VAG3_DROME	Dmel\CG7829	RH19795p	89700000	115000000	99300000	78400000	84100000	90300000	63900000	75800000	79300000	79300000	77100000	88800000		92800000	7.73667e+07	0.833693
Q5U117	Q5U117_DROME	Egm	Enigma	97300000	86400000	97200000	91500000	92400000	91000000	90800000	88200000	94900000	87700000	91800000	91100000		9.26333e+07	90750000	0.979669
Q9VTZ6	PMM_DROME	Pmm2	Phosphomannomutase	93100000	90200000	98800000	102000000	91800000	79700000	60300000	81200000	73700000	79500000	73300000	77400000		92600000	7.42333e+07	0.801656
Q9V784	SAM50_DROME	CG7639	SAM50-like protein CG7639	99400000	97700000	90400000	93400000	93200000	81000000	94400000	96800000	96900000	91300000	94200000	94700000		9.25167e+07	9.47167e+07	1.02378
Q9VDL0	Q9VDL0_DROME	Srp14	Signal recognition particle 14 kDa protein	74100000	81500000	99000000	88400000	106000000	104000000	85700000	91700000	77700000	80000000	85000000	84300000		9.21667e+07	8.40667e+07	0.912116
Q9VT04	PATH_DROME	path	Proton-coupled amino acid transporter-like protein pathetic	95900000	91200000	101000000	91800000	84100000	88200000	86300000	83100000	94700000	82000000	81700000	80300000		9.20333e+07	8.46833e+07	0.920138
Q9VR59	VIP1_DROME	l(1)G0196	Inositol hexakisphosphate and diphosphoinositol-pentakisphosphate kinase	98900000	92200000	92100000	93900000	88100000	86800000	96700000	93600000	94400000	92000000	96800000	94700000		92000000	94700000	1.02935
Q9VC06	Q9VC06_DROME	Dmel\CG11771	LD37516p	94000000	86200000	95800000	91900000	92700000	89700000	95500000	96400000	97900000	95800000	98200000	99600000		9.17167e+07	9.72333e+07	1.06015
Q9VGP6	PFD3_DROME	mgr	Prefoldin subunit 3	89600000	91300000	89500000	86900000	103000000	89200000	98000000	100000000	103000000	105000000	91600000	99800000		9.15833e+07	9.95667e+07	1.08717
P05031	DDC_DROME	Ddc	Aromatic-L-amino-acid decarboxylase	90200000	90500000	89100000	93800000	88700000	96900000	102000000	89900000	89600000	86800000	99600000	88900000		9.15333e+07	92800000	1.01384
Q9V4C7	Q9V4C7_DROME	PMCA	Calcium-transporting ATPase	90000000	82300000	98600000	96500000	76900000	103000000	98900000	92000000	99500000	87200000	93000000	81600000		9.12167e+07	9.20333e+07	1.00895
Q9Y136	Q9Y136_DROME	Nepl21	Neprilysin-like 21	81200000	89100000	90700000	91200000	103000000	91800000	75000000	77200000	70800000	74400000	71400000	74100000		9.11667e+07	7.38167e+07	0.809689
O76902	PKHF1_DROME	rush	Pleckstrin homology domain-containing family F member 1 homolog	94100000	91300000	87900000	95300000	89400000	88600000	97500000	96300000	97400000	109000000	107000000	102000000		91100000	1.01533e+08	1.11453
Q9VGT0	Q9VGT0_DROME	Ugt35B1	UDP-glucuronosyltransferase	95200000	103000000	88300000	72800000	92000000	95000000	107000000	102000000	134000000	147000000	112000000	66700000		91050000	111450000	1.22405
Q24211	STNA_DROME	stnA	Protein stoned-A	97700000	89300000	84700000	90700000	92900000	90800000	89000000	91200000	96700000	93300000	94100000	92400000		9.10167e+07	9.27833e+07	1.01941
P36188-3	TNNI_DROME	wupA	Isoform 2 of Troponin I	94700000	102000000	70900000	94400000	104000000	79500000	78500000	83100000	81600000	89700000	76500000	100000000		9.09167e+07	84900000	0.933822
Q9VIX4	Q9VIX4_DROME	Dmel\CG17544	Acyl-coenzyme A oxidase	88500000	78000000	92300000	91900000	97800000	95000000	71100000	75400000	69600000	74600000	74700000	77800000		9.05833e+07	7.38667e+07	0.815455
Q5LJX8;Q7PLW1;Q8SXS9	Q5LJX8_DROME;Q7PLW1_DROME;Q8SXS9_DROME	zyd	Zydeco, isoform F	76000000	92700000	83100000	87700000	93200000	110000000	86500000	84100000	88500000	86200000	105000000	81800000		90450000	8.86833e+07	0.980468
Q9VY78	CLIC_DROME	Clic	Chloride intracellular channel Clic	72400000	103000000	102000000	98300000	85200000	81400000	115000000	76700000	107000000	121000000	92800000	111000000		9.03833e+07	1.03917e+08	1.14973
Q8IQX3	Q8IQX3_DROME	Dmel\CG32544	Uncharacterized protein, isoform A	90500000	77700000	88600000	95900000	96900000	92400000	90700000	95600000	89800000	94800000	88300000	92500000		9.03333e+07	91950000	1.0179
Q8T0U6	Q8T0U6_DROME	flw	Serine/threonine-protein phosphatase	97700000	92500000	95900000	98100000	82600000	74900000	101000000	95300000	99800000	98800000	105000000	100000000		9.02833e+07	9.99833e+07	1.10744
A1ZAQ9	A1ZAQ9_DROME	Gbp1	GEO12066p1	96300000	89700000	79500000	85600000	88600000	101000000	80900000	55900000	82000000	64400000	71100000	55600000		9.01167e+07	6.83167e+07	0.758091
Q01617-6	CPO_DROME	cpo	Isoform 2 of Protein couch potato	92000000	90400000	89400000	99100000	89300000	79200000	80100000	80900000	87500000	91400000	81100000	82500000		89900000	8.39167e+07	0.933445
Q9VG26	Q9VG26_DROME	CG10135	MIP06012p	80700000	98100000	88300000	92000000	88800000	91200000	111000000	103000000	105000000	106000000	109000000	106000000		89850000	1.06667e+08	1.18716
Q9W078	Q9W078_DROME	Cpr62Bb	Cuticular protein 62Bb, isoform A	105000000	70900000	87400000	97100000	97100000	81100000	78900000	74500000	89000000	84100000	81800000	77200000		8.97667e+07	8.09167e+07	0.901411
O97066	O97066_DROME	twr	Signal peptidase complex catalytic subunit SEC11	81300000	100000000	89400000	85700000	85500000	96500000	100000000	92600000	100000000	104000000	103000000	99600000		8.97333e+07	9.98667e+07	1.11293
Q9VJI5	Q9VJI5_DROME	yellow-b	LD43175p	85300000	91100000	87200000	90600000	94900000	89200000	112000000	89100000	120000000	116000000	101000000	108000000		8.97167e+07	1.07683e+08	1.20026
Q9VDZ7;Q9VDZ8	Q9VDZ7_DROME;Q9VDZ8_DROME	CG117799	Mitochondrial import inner membrane translocase subunit TIM44	83800000	97200000	90300000	87800000	90900000	87000000	98800000	95800000	110000000	108000000	101000000	95900000		89500000	1.01583e+08	1.13501
Q9VH66	Q9VH66_DROME	Dmel\CG8500	FI18258p1	89400000	86400000	92600000	93000000	92000000	83200000	101000000	105000000	107000000	91300000	101000000	116000000		8.94333e+07	103550000	1.15785
Q7PLL3	Q7PLL3_DROME	eIF4B	Eukaryotic initiation factor 4B	91300000	81300000	98500000	85400000	87500000	92300000	77200000	72900000	74300000	73600000	68400000	76700000		8.93833e+07	73850000	0.826217
Q9VLX0	Q9VLX0_DROME	LKRSDH	Lysine ketoglutarate reductase/saccharopine dehydrogenase, isoform A	99600000	81100000	98400000	84800000	82600000	89400000	50400000	57500000	57100000	52600000	61800000	50800000		8.93167e+07	5.50333e+07	0.61616
Q95028	LDH_DROME	Ldh	L-lactate dehydrogenase	91900000	99000000	85600000	81600000	91100000	86100000	87900000	98000000	85100000	98600000	98200000	87300000		8.92167e+07	9.25167e+07	1.03699
P48555	RALA_DROME	Rala	Ras-related protein Ral-a	71200000	77100000	103000000	89800000	94600000	98100000	104000000	105000000	110000000	99100000	97800000	108000000		8.89667e+07	1.03983e+08	1.16879
M9PCA7;M9PI37	M9PCA7_DROME;M9PI37_DROME	Ncc69	Sodium chloride cotransporter 69, isoform C	86300000	90000000	94000000	91900000	89200000	82000000	86700000	90100000	82200000	87400000	84600000	83700000		88900000	8.57833e+07	0.964942
Q8SXM8;Q9W327	Q8SXM8_DROME;Q9W327_DROME	LysRS	Lysine--tRNA ligase	94100000	89600000	84600000	81500000	93700000	89600000	77200000	85200000	79400000	79000000	80300000	80800000		88850000	8.03167e+07	0.903958
P46824	KLC_DROME	Klc	Kinesin light chain	87900000	85600000	90100000	85800000	90900000	92800000	87600000	89500000	87400000	88800000	91100000	91900000		88850000	8.93833e+07	1.006
Q8IPH0	Q8IPH0_DROME	Tg	Transglutaminase, isoform B	92100000	82400000	82800000	93600000	92900000	89300000	106000000	97700000	102000000	99700000	93400000	106000000		88850000	100800000	1.1345
Q9VC31	Q9VC31_DROME	RabX4	RabX4	96300000	79200000	90400000	95800000	94100000	75600000	79500000	77300000	89300000	80000000	86700000	86000000		8.85667e+07	8.31333e+07	0.938653
Q9VEZ3	MSPS_DROME	msps	Protein mini spindles	89500000	86900000	88000000	88300000	87900000	88600000	93400000	92400000	96300000	97500000	96900000	98700000		88200000	9.58667e+07	1.08692
P10040-2	CRB_DROME	crb	Isoform B of Protein crumbs	101000000	81000000	91800000	91700000	84800000	76500000	78300000	78800000	70300000	72700000	77200000	76500000		87800000	7.56333e+07	0.861427
A0A4D6K506;Q9VNR2	A0A4D6K506_DROME;Q9VNR2_DROME	SPoCk	Calcium-transporting ATPase	98200000	84800000	82900000	91100000	90700000	79000000	94600000	96300000	97400000	93500000	92900000	99400000		8.77833e+07	9.56833e+07	1.08999
Q6NP69	Q6NP69_DROME	gfzf	GST-containing FLYWCH zinc-finger protein	94000000	81900000	86000000	86000000	89000000	87400000	82800000	74800000	86500000	78300000	78200000	80600000		8.73833e+07	80200000	0.917795
P08111	L2GL_DROME	l(2)gl	Lethal(2) giant larvae protein	86100000	89700000	85600000	88100000	80800000	93700000	92900000	81800000	85500000	87900000	83300000	88600000		8.73333e+07	8.66667e+07	0.992366
E8NH67;Q9W5X1	E8NH67_DROME;Q9W5X1_DROME	aspr	GH07746p	104000000	66000000	93900000	99600000	83600000	76200000	61200000	52700000	47800000	57100000	56000000	53900000		8.72167e+07	5.47833e+07	0.628129
Q9VKV1	Q9VKV1_DROME	LManII	Alpha-mannosidase	79500000	105000000	84600000	81500000	88500000	84200000	65900000	66600000	69400000	64100000	61500000	61400000		8.72167e+07	6.48167e+07	0.743168
A8JR72	A8JR72_DROME	CASK	CASK, isoform E	107000000	81400000	98000000	87900000	82900000	66000000	62100000	62700000	55400000	55400000	58300000	63800000		87200000	5.96167e+07	0.683677
Q9VJ58	Q9VJ58_DROME	Faf2	Fas-associated factor 2, isoform A	92100000	85100000	89500000	89300000	82500000	84000000	80800000	81400000	79900000	82900000	83100000	84000000		8.70833e+07	8.20167e+07	0.941818
Q9VTU8	Q9VTU8_DROME	CAH2	Carbonic anhydrase 2, isoform A	87100000	86900000	76200000	84800000	93800000	93200000	100000000	99200000	103000000	102000000	104000000	105000000		87000000	102200000	1.17471
A0A0B4K7I2;A0A0B4K7W3	A0A0B4K7I2_DROME;A0A0B4K7W3_DROME	sm	Smooth, isoform T	97200000	80400000	88700000	89100000	86100000	80100000	84900000	88100000	89600000	82200000	82200000	89400000		8.69333e+07	8.60667e+07	0.990031
Q9VCC6	Q9VCC6_DROME	Dmel\CG6178	Luciferin 4-monooxygenase	83500000	76900000	88300000	101000000	84100000	87500000	80900000	75900000	72200000	75100000	76500000	84000000		8.68833e+07	7.74333e+07	0.891233
M9PD65	M9PD65_DROME	RanGAP	Ran GTPase activating protein, isoform C	88700000	80900000	82900000	90300000	87600000	90500000	74900000	78300000	80700000	75400000	74900000	78100000		8.68167e+07	77050000	0.887502
A1Z6H7	PO210_DROME	Gp210	Nuclear pore membrane glycoprotein 210	89700000	84800000	83200000	89600000	90500000	82700000	89600000	91900000	92000000	90300000	92800000	91400000		86750000	9.13333e+07	1.05283
Q9VSY8	Q9VSY8_DROME	Bet3	Trafficking protein particle complex subunit	83600000	90800000	84400000	88200000	89300000	83300000	106000000	77200000	115000000	97000000	102000000	103000000		86600000	1.00033e+08	1.15512
Q9VYM7	Q9VYM7_DROME	Pripl4	Uncharacterized protein, isoform C	80600000	92000000	84500000	75000000	77500000	110000000	101000000	97900000	140000000	110000000	141000000	105000000		86600000	1.15817e+08	1.33737
Q9VTM6	CRIM_DROME	crim	UPAR/Ly6 domain-containing protein crim	106000000	67500000	98400000	99500000	85800000	61100000	72400000	75300000	49300000	67000000	73500000	69100000		8.63833e+07	6.77667e+07	0.784488
Q7K738	UBC10_DROME	Ubc10	Ubiquitin-conjugating enzyme E2-18 kDa	88100000	84900000	87900000	85900000	88200000	83000000	83600000	87700000	89100000	88800000	85900000	87400000		8.63333e+07	8.70833e+07	1.00869
Q9VZW7	Q9VZW7_DROME	CPT2	Carnitine palmitoyltransferase 2	83800000	84200000	91700000	85700000	83600000	88000000	98500000	96800000	97400000	93500000	90500000	91600000		8.61667e+07	9.47167e+07	1.09923
Q8IPP8	Q8IPP8_DROME	Dmel\CG31548	Uncharacterized protein	86000000	84900000	90100000	82400000	84000000	89400000	81300000	83100000	79100000	81900000	82900000	75200000		8.61333e+07	8.05833e+07	0.935565
Q7JY99	Q7JY99_DROME	Dmel\CG8298	glycerol kinase	74200000	88600000	92000000	96600000	81600000	81900000	86400000	84500000	85700000	80000000	90700000	86600000		8.58167e+07	85650000	0.998058
Q0KIA8;A0A126GUQ4;Q9VI16	A0A126GUQ4_DROME;Q0KIA8_DROME;Q9VI16_DROME	CRAT	Carnitine O-Acetyl-Transferase, isoform E	91700000	80200000	86900000	87200000	84500000	84400000	88000000	92200000	85400000	87100000	89200000	87400000		8.58167e+07	8.82167e+07	1.02797
Q9VWI2	Q9VWI2_DROME	Naa15-16	N(Alpha)-acetyltransferase 15/16, isoform A	88900000	85200000	83600000	87800000	81100000	88200000	85700000	85500000	83500000	85300000	86900000	82800000		85800000	84950000	0.990093
Q9VDU2	Q9VDU2_DROME	Acsx2	Luciferin 4-monooxygenase	93700000	80500000	84600000	91500000	85200000	79300000	91700000	86700000	86700000	90700000	88300000	92500000		85800000	8.94333e+07	1.04235
Q9VP57	Q9VP57_DROME	pzg	LD15904p	76000000	86700000	86300000	90900000	84400000	90400000	99900000	89600000	99500000	85100000	96400000	94700000		8.57833e+07	94200000	1.09812
Q0E8J3	Q0E8J3_DROME	zormin	Zormin, isoform I	92000000	81800000	85200000	77700000	86100000	90900000	79300000	81600000	90100000	86600000	80700000	83400000		8.56167e+07	8.36167e+07	0.97664
Q7KLW9	Q7KLW9_DROME	Prp19	Pre-mRNA-processing factor 19	90100000	81900000	81800000	87500000	80700000	89500000	83400000	82400000	87200000	80800000	82800000	83200000		85250000	83300000	0.977126
Q9VG51	Q9VG51_DROME	Snx3	RE52028p	81300000	89500000	81900000	82800000	86100000	89200000	90100000	93400000	98800000	99100000	96800000	96700000		8.51333e+07	9.58167e+07	1.12549
Q9VKZ7	Q9VKZ7_DROME	Q9VKZ7_DROME	Nicalin	88500000	86300000	81700000	85100000	82000000	86600000	86300000	89700000	80600000	82400000	86000000	80900000		8.50333e+07	8.43167e+07	0.991572
M9PC24;M9PER0;Q8IGP1	M9PC24_DROME;M9PER0_DROME;Q8IGP1_DROME	BcDNA:RH19933;CG8154;CG8163	Uncharacterized protein, isoform K	85700000	89400000	81200000	77400000	81300000	94200000	83400000	77900000	90100000	93300000	88300000	80400000		8.48667e+07	8.55667e+07	1.00825
Q7JVK6	Q7JVK6_DROME	trsn	Translin	88700000	91400000	79100000	88200000	79800000	80500000	91900000	88400000	91800000	89500000	87500000	90600000		8.46167e+07	89950000	1.06303
Q9VH09	Q9VH09_DROME	Dmel\CG3999	Glycine cleavage system P protein	89600000	86000000	94600000	81200000	71000000	84700000	62600000	63500000	65300000	73500000	65800000	54100000		8.45167e+07	6.41333e+07	0.758825
Q11002	CANA_DROME	CalpA	Calpain-A	80500000	84100000	80500000	85900000	88400000	87400000	78000000	86100000	81500000	86500000	81900000	87800000		8.44667e+07	8.36333e+07	0.990134
Q9VH76	Q9VH76_DROME	Snap24	Synaptosomal-associated protein	67100000	74800000	92200000	83100000	89500000	98400000	109000000	101000000	101000000	111000000	104000000	106000000		8.41833e+07	1.05333e+08	1.25124
Q5U124	Q5U124_DROME	Mal-A5	alpha-glucosidase	75700000	103000000	82000000	78600000	76400000	88900000	76700000	71600000	79500000	74800000	76000000	76900000		84100000	7.59167e+07	0.902695
Q9W196	Q9W196_DROME	Dmel\CG3356	HECT-type E3 ubiquitin transferase	84900000	82700000	86700000	85500000	83500000	80300000	98100000	105000000	97000000	89800000	103000000	101000000		8.39333e+07	9.89833e+07	1.17931
Q9VCG3	OPA32_DROME	CG13601	Putative OPA3-like protein CG13603	80600000	84800000	94600000	101000000	74900000	67600000	91200000	84400000	88900000	96500000	98400000	112000000		8.39167e+07	9.52333e+07	1.13486
Q9Y137	Q9Y137_DROME	mino	BcDNA.GH07066	89000000	73900000	97400000	76400000	77900000	88700000	82800000	81200000	76200000	74400000	75300000	69600000		8.38833e+07	7.65833e+07	0.912974
Q9VJ33	NEDD8_DROME	Nedd8	NEDD8	65000000	109000000	87600000	50700000	70700000	120000000	126000000	98400000	148000000	136000000	135000000	109000000		8.38333e+07	125400000	1.49583
Q9VKG4	Q9VKG4_DROME	Dmel\CG31705	BcDNA.GH07269	86100000	79700000	81900000	88000000	86400000	80100000	98400000	84800000	91200000	92200000	95500000	105000000		83700000	9.45167e+07	1.12923
P13678	KPC3_DROME	Pkc98E	Protein kinase C	90200000	84000000	87800000	81700000	79400000	79000000	88800000	83200000	80200000	79500000	88200000	84200000		8.36833e+07	8.40167e+07	1.00398
Q9W0H8	Q9W0H8_DROME	scf	IP16409p	78600000	93300000	76800000	70200000	85800000	97300000	107000000	86100000	97100000	101000000	98300000	89600000		8.36667e+07	9.65167e+07	1.15359
Q9V3E5	Q9V3E5_DROME	Tsp66E	Tetraspanin	101000000	82600000	88700000	88700000	73500000	66900000	66700000	64700000	52900000	61300000	72700000	69500000		8.35667e+07	6.46333e+07	0.773434
Q7K5J8	Q7K5J8_DROME	Cpr57A	Cuticular protein 57A, isoform A	87000000	69600000	78600000	86500000	87000000	90900000	82900000	75100000	89400000	76200000	87000000	76500000		8.32667e+07	8.11833e+07	0.97498
D0IQJ8;M9PG83	D0IQJ8_DROME;M9PG83_DROME	Csp	Cysteine string protein, isoform F	74400000	92900000	81100000	76900000	79300000	94900000	129000000	104000000	137000000	131000000	113000000	132000000		83250000	1.24333e+08	1.49349
Q24276	CDC37_DROME	Cdc37	Hsp90 co-chaperone Cdc37	89500000	90500000	86400000	68800000	77900000	86200000	83400000	88400000	90900000	86300000	88000000	84200000		8.32167e+07	8.68667e+07	1.04386
Q8I7C3;Q8I7C3-2	LASP1_DROME	Lasp	LIM and SH3 domain protein Lasp	81300000	86300000	81800000	81000000	86600000	82100000	82000000	83600000	84200000	85100000	81900000	84200000		8.31833e+07	83500000	1.00381
P91927	LETM1_DROME	Letm1	Mitochondrial proton/calcium exchanger protein	84200000	81900000	85400000	84700000	77800000	85000000	87200000	79600000	87100000	87400000	86900000	81500000		8.31667e+07	84950000	1.02144
P32748	PYRD_DROME	Dhod	Dihydroorotate dehydrogenase (quinone), mitochondrial	97000000	75500000	83400000	77300000	82400000	83300000	70700000	76000000	78300000	77200000	76400000	76300000		83150000	7.58167e+07	0.911806
Q9VVA6	NDC_DROME	nudC	Nuclear migration protein nudC	85600000	76700000	84000000	86100000	84800000	81300000	80500000	85800000	80300000	81900000	79400000	84200000		8.30833e+07	8.20167e+07	0.987161
P15348	TOP2_DROME	Top2	DNA topoisomerase 2	81600000	82600000	86900000	84800000	79900000	82200000	87800000	88100000	93900000	88900000	87900000	88700000		83000000	8.92167e+07	1.0749
Q9VMA2	GALT_DROME	Galt	Probable galactose-1-phosphate uridylyltransferase	82500000	85900000	91200000	79100000	83200000	75500000	85700000	90100000	85800000	89200000	82300000	79600000		82900000	85450000	1.03076
Q86B94;Q9VGF0	Q86B94_DROME;Q9VGF0_DROME	mfas	FI19380p1	91600000	80500000	79800000	84200000	90300000	68900000	73500000	72800000	69800000	74200000	73900000	74300000		82550000	7.30833e+07	0.885322
Q9V3V9	Q9V3V9_DROME	EndoGI	Endonuclease G inhibitor, isoform A	67700000	95700000	82900000	78800000	85600000	83900000	88500000	86100000	89800000	90000000	88700000	91400000		8.24333e+07	8.90833e+07	1.08067
O46098	BCN92_DROME	bcn92	Protein bcn92	82700000	76800000	79600000	83500000	90100000	81800000	81700000	79800000	75400000	82500000	78600000	90400000		8.24167e+07	81400000	0.987664
Q9W0B3	Q9W0B3_DROME	Vta1	GH19706p	94600000	80100000	81600000	88000000	77100000	71400000	71600000	76900000	73000000	74900000	73200000	76200000		8.21333e+07	74300000	0.904627
Q960D4	Q960D4_DROME	EG:22E5.5	SD06560p	88200000	75700000	83900000	85700000	82400000	76900000	85600000	93100000	92700000	91000000	90700000	90100000		8.21333e+07	9.05333e+07	1.10227
Q9VG04	Q9VG04_DROME	dMEMO	LP04475p	76900000	84200000	80000000	79600000	84700000	86600000	83000000	86900000	83200000	85900000	83800000	81800000		82000000	84100000	1.02561
Q9V400	Q9V400_DROME	Ilk	Integrin linked kinase, isoform A	66700000	86600000	82900000	77900000	83800000	93600000	83400000	73700000	84600000	82700000	73100000	82800000		8.19167e+07	80050000	0.977213
Q9VQR8	Q9VQR8_DROME	LeuRS	leucine--tRNA ligase	81500000	74400000	81600000	84700000	86300000	81100000	71300000	71000000	70300000	71000000	72700000	68100000		81600000	7.07333e+07	0.86683
Q9W0H6	Q9W0H6_DROME	Acat2	acetyl-CoA C-acetyltransferase	80900000	77000000	77900000	82900000	86700000	83600000	76800000	78500000	75200000	78400000	76400000	80800000		81500000	7.76833e+07	0.95317
Q9VL66	Q9VL66_DROME	Dmel\CG4592	FI09311p	88400000	83900000	95300000	89200000	65900000	66000000	99500000	107000000	83600000	85000000	93000000	77900000		81450000	91000000	1.11725
Q7K0E6	Q7K0E6_DROME	AspRS	Aspartate--tRNA ligase, cytoplasmic	86000000	81600000	81400000	80700000	74700000	83700000	88100000	80600000	82000000	84300000	81600000	78600000		81350000	8.25333e+07	1.01455
Q95U15	Q95U15_DROME	Mf	GH14252p	64100000	74900000	84700000	82600000	77700000	104000000	80500000	98600000	94300000	77000000	78800000	114000000		8.13333e+07	9.05333e+07	1.11311
Q9VJ68	Q9VJ68_DROME	Dmel\CG31751	Hydroxylysine kinase	86200000	78100000	77800000	84400000	83200000	77300000	80500000	78300000	73800000	75400000	72000000	77900000		8.11667e+07	7.63167e+07	0.940246
A0A0B4KEE4	KOI_DROME	koi	Klaroid protein	83900000	85800000	79000000	81500000	75100000	81300000	84600000	84200000	86900000	83000000	85400000	80600000		81100000	8.41167e+07	1.0372
O02195	EIF3I_DROME	eIF3i	Eukaryotic translation initiation factor 3 subunit I	85300000	74700000	80500000	84300000	84600000	76700000	74100000	76300000	83400000	87600000	81700000	77000000		8.10167e+07	8.00167e+07	0.987657
Q9W136	Q9W136_DROME	Dmel\CG42361	Uncharacterized protein	79500000	79800000	81900000	77300000	75400000	91500000	76500000	88600000	102000000	84700000	98700000	83300000		80900000	8.89667e+07	1.09971
Q9VZS3	ETIF1_DROME	eIF1	Eukaryotic translation initiation factor eIF1	76100000	84700000	77700000	82800000	78100000	85600000	77600000	77200000	84300000	91600000	83200000	81500000		8.08333e+07	8.25667e+07	1.02144
Q8T0T9	Q8T0T9_DROME	BEST:CK00246	Novel acetylcholine receptor chaperone	74700000	73700000	93200000	91400000	74100000	77700000	67200000	98700000	63400000	66100000	69300000	79600000		80800000	74050000	0.91646
A8DZ06;X2J9Z3	A8DZ06_DROME;X2J9Z3_DROME	stol	Stolid, isoform J	78100000	90900000	80300000	75300000	74000000	85500000	95300000	87800000	103000000	95800000	95100000	101000000		8.06833e+07	9.63333e+07	1.19397
P02515	HSP22_DROME	Hsp22	Heat shock protein 22	70300000	92200000	81400000	68300000	86900000	84900000	73600000	109000000	74300000	86100000	93300000	62300000		8.06667e+07	83100000	1.03017
Q9VUM2	Q9VUM2_DROME	Dmel\CG6878	Reactive oxygen species modulator 1	86800000	80700000	114000000	102000000	53600000	46800000	76100000	85200000	45200000	45700000	53000000	50200000		80650000	5.92333e+07	0.734449
Q9VPJ9	Q9VPJ9_DROME	CK02656	Uncharacterized protein, isoform B	77600000	71500000	86200000	84400000	79000000	84200000	93600000	93200000	94400000	92400000	86700000	88500000		8.04833e+07	9.14667e+07	1.13647
Q9VVW8	NNRD_DROME	Naxd	ATP-dependent (S)-NAD(P)H-hydrate dehydratase	82400000	73900000	84200000	79300000	79100000	83800000	83800000	81100000	78000000	83600000	77400000	67600000		80450000	7.85833e+07	0.976797
E1JGY6	E1JGY6_DROME	hlk	Lethal (2) 01289, isoform F	77600000	81700000	80100000	75700000	82900000	83700000	85900000	80700000	89700000	85300000	84800000	86200000		8.02833e+07	8.54333e+07	1.06415
Q9VSS2	SRP68_DROME	Srp68	Signal recognition particle subunit SRP68	82300000	73400000	83900000	84400000	76800000	80600000	78600000	85900000	80900000	79300000	80400000	85300000		8.02333e+07	8.17333e+07	1.0187
Q9V3D9	Q9V3D9_DROME	Srp54k	Signal recognition particle 54 kDa protein	96500000	77200000	83900000	86000000	71400000	65200000	72000000	86200000	61400000	66700000	78200000	71200000		8.00333e+07	7.26167e+07	0.90733
Q9V3Y2	DRE2_DROME	CIAPIN1	Anamorsin homolog	75200000	79400000	79500000	80100000	81500000	84500000	86300000	75300000	90200000	89000000	89400000	87200000		8.00333e+07	8.62333e+07	1.07747
Q9W158	Q9W158_DROME	Dmel\CG4612	LD36772p	87700000	78700000	78100000	82100000	76300000	77000000	83400000	82300000	88900000	91300000	86200000	91100000		7.99833e+07	87200000	1.09023
M9PDP3	M9PDP3_DROME	fon	Fondue, isoform D	85700000	91100000	65800000	58800000	85000000	93300000	67800000	55300000	64100000	61700000	52700000	51900000		79950000	5.89167e+07	0.736919
P20348;P20348-2	JANA_DROME	janA	Sex-regulated protein janus-A	87400000	87400000	69500000	76900000	79900000	77900000	101000000	109000000	98300000	110000000	106000000	114000000		7.98333e+07	1.06383e+08	1.33257
M9PB30;M9PBZ0;M9PC45;M9PC41	M9PB30_DROME;M9PBZ0_DROME;M9PC41_DROME;M9PC45_DROME	dpy	Dumpy, isoform Q	109000000	63800000	80000000	80700000	76300000	68200000	50700000	52700000	43400000	50400000	52600000	53200000		7.96667e+07	50500000	0.633891
M9MS48;Q9VYD8	M9MS48_DROME;Q9VYD8_DROME	Rbp1-like	Rbp1-like, isoform B	81800000	72200000	71400000	74000000	87900000	90300000	85900000	90300000	104000000	94600000	97800000	91600000		79600000	9.40333e+07	1.18132
Q7KB18	Q7KB18_DROME	Jheh2	Epoxide hydrolase	81900000	90800000	79600000	80600000	70300000	73400000	91200000	82600000	78900000	77400000	81500000	76000000		7.94333e+07	8.12667e+07	1.02308
Q9VLY9;Q8IPH4;Q8IPH5;Q9NFV7;Q9VLZ0	Q8IPH4_DROME;Q8IPH5_DROME;Q9NFV7_DROME;Q9VLY9_DROME;Q9VLZ0_DROME	Tep2	Thioester-containing protein 2, isoform D	84300000	86800000	73600000	71500000	85900000	74200000	76400000	63900000	68300000	71000000	61500000	61300000		7.93833e+07	6.70667e+07	0.844846
Q9VB64	Q9VB64_DROME	CG31063	Uncharacterized protein, isoform A	76000000	96200000	78600000	77300000	70000000	77100000	96800000	94100000	105000000	105000000	109000000	101000000		79200000	1.01817e+08	1.28556
Q9VN73	Q9VN73_DROME	Jhbp1	RE70318p	71400000	77200000	69500000	99500000	85100000	72300000	67300000	79500000	74000000	75600000	72500000	77700000		7.91667e+07	7.44333e+07	0.940211
Q9VMU4	RL37A_DROME	RpL37A	Large ribosomal subunit protein eL43	91900000	75700000	94600000	79500000	76200000	56800000	54800000	72200000	55600000	65900000	66300000	56300000		7.91167e+07	61850000	0.781757
M9MSK4	M9MSK4_DROME	Sh3beta	Sh3beta, isoform D	83100000	86400000	73300000	80500000	80100000	71200000	81300000	78400000	81400000	79000000	77000000	77100000		79100000	7.90333e+07	0.999157
Q9VB02	Q9VB02_DROME	CROT	Carnitine O-octanoyltransferase, isoform A	80900000	74900000	80100000	79600000	72600000	86500000	138000000	112000000	108000000	118000000	146000000	113000000		79100000	122500000	1.54867
Q9VVL5	Q9VVL5_DROME	Dmel\CG5567	Glycerol-3-phosphate phosphatase	84000000	74600000	73600000	80200000	86200000	75400000	76000000	72100000	73100000	79100000	81500000	84400000		79000000	77700000	0.983544
F3YDF1;F3YDF1-2	YMEL1_DROME	YME1L	ATP-dependent zinc metalloprotease YME1L	80500000	73800000	80600000	78900000	82500000	77500000	77400000	77100000	76100000	77600000	79400000	79400000		7.89667e+07	7.78333e+07	0.985648
M9PFZ1	M9PFZ1_DROME	Nopp140	Nopp140, isoform E	82800000	68700000	78800000	86000000	79400000	77700000	68200000	78500000	80100000	75700000	78500000	67200000		78900000	74700000	0.946768
Q7JZY1	Q7JZY1_DROME	Dmel\CG2310	RE06389p	79600000	75900000	83400000	82300000	78600000	73300000	84300000	94400000	93700000	83500000	94000000	100000000		78850000	91650000	1.16233
Q8IRD6	Q8IRD6_DROME	Drsl4	Dro4 protein	78800000	85400000	98700000	67600000	73000000	68200000	86900000	87000000	54500000	58100000	65000000	72000000		7.86167e+07	7.05833e+07	0.897816
Q9VJG0	XPP_DROME	ApepP	Xaa-Pro aminopeptidase ApepP	72800000	81200000	75700000	75200000	80300000	86300000	83600000	81700000	84800000	81300000	81200000	81300000		7.85833e+07	8.23167e+07	1.04751
A0A0B4JCX2;A0A0B4JDC9;A0A0B4KGQ6;A0A126GUV2;E1JIL7;Q9VF66	A0A0B4JCX2_DROME;A0A0B4JDC9_DROME;A0A0B4KGQ6_DROME;A0A126GUV2_DROME;E1JIL7_DROME;Q9VF66_DROME	Rbp	RIM-binding protein, isoform G	71000000	81000000	76300000	84800000	84400000	73300000	81500000	80800000	95400000	90400000	85600000	94700000		7.84667e+07	8.80667e+07	1.12234
Q7JYX2	Q7JYX2_DROME	Dmel\CG2065	RH23455p	72100000	75000000	79100000	87600000	77600000	78800000	77200000	64600000	72000000	74800000	80700000	76300000		7.83667e+07	7.42667e+07	0.947682
Q9VAA9	Q9VAA9_DROME	Jasper	JIL-1 anchoring and stabilizing protein, isoform A	82700000	73700000	73300000	74100000	83700000	82100000	76300000	74100000	67600000	68800000	75100000	71700000		7.82667e+07	7.22667e+07	0.923339
P49028	MGN_DROME	mago	Protein mago nashi	79200000	67300000	85800000	88900000	84300000	63400000	69700000	79800000	79800000	69600000	74600000	81400000		78150000	7.58167e+07	0.970143
Q9W5X0	Q9W5X0_DROME	Rab35	LD21953p	73900000	77900000	82200000	84600000	75300000	75000000	108000000	90600000	97900000	91800000	91300000	103000000		78150000	97100000	1.24248
A0A0B4KGU9;A0A0B4K6F9;Q7KS16;Q9VC62	A0A0B4K6F9_DROME;A0A0B4KGU9_DROME;Q7KS16_DROME;Q9VC62_DROME	Esyt2	Extended synaptotagmin-like protein 2, isoform C	75600000	76700000	77100000	76400000	80900000	81200000	77700000	82500000	75400000	76900000	75200000	77300000		7.79833e+07	77500000	0.993802
Q9V3T8	Q9V3T8_DROME	SC35	LD32469p	88600000	78100000	85800000	77800000	76700000	60500000	72600000	76600000	67900000	80900000	82200000	77700000		7.79167e+07	7.63167e+07	0.979465
Q9VN01	Q9VN01_DROME	Nepl11	GH23891p	77800000	75600000	78900000	80400000	81200000	73600000	70900000	81700000	84200000	87200000	86800000	86400000		7.79167e+07	8.28667e+07	1.06353
P43332	SNRPA_DROME	snf	U1 small nuclear ribonucleoprotein A	81000000	75200000	71900000	76600000	84200000	77700000	78100000	82200000	79100000	93800000	97800000	85100000		7.77667e+07	8.60167e+07	1.10609
Q9VXZ8	Q9VXZ8_DROME	pdgy	BcDNA.GH02901	77700000	75500000	76600000	78800000	80500000	77300000	90500000	86900000	92600000	87200000	89500000	92800000		7.77333e+07	8.99167e+07	1.15673
C9QPE7;Q9VM19	C9QPE7_DROME;Q9VM19_DROME	CG5171-RC;Dmel\CG5171	Trehalose 6-phosphate phosphatase	79300000	84000000	87400000	64500000	73400000	77600000	85700000	86700000	80100000	82200000	77100000	76200000		77700000	8.13333e+07	1.04676
Q9W151	Q9W151_DROME	ITP	GEO11329p1	85800000	68200000	80500000	80200000	85400000	66000000	50200000	59100000	50400000	45700000	50500000	53900000		7.76833e+07	5.16333e+07	0.664664
B7Z0M9;Q7KSB3	B7Z0M9_DROME;Q7KSB3_DROME	Orp8	Oxysterol-binding protein	82600000	71500000	81400000	80600000	77900000	71800000	69900000	76700000	75100000	72300000	72500000	74900000		7.76333e+07	7.35667e+07	0.947617
Q7K1C0	Q7K1C0_DROME	ND-15	GH23780p	87600000	69900000	82300000	76900000	74700000	73300000	63000000	67800000	65300000	62200000	62700000	65300000		77450000	6.43833e+07	0.831289
Q9VPZ5	Q9VPZ5_DROME	CT16527	GH04232p	79400000	79800000	71000000	77300000	81200000	73800000	73300000	69800000	65600000	63200000	63700000	64000000		7.70833e+07	66600000	0.864
Q9VD14	Q9VD14_DROME	Dmel\CG13850	GH07286p	80200000	77700000	78100000	77500000	79000000	70000000	75800000	77100000	76000000	66900000	77000000	70000000		7.70833e+07	73800000	0.957405
Q7K8Y3;Q7K8Y5	Q7K8Y3_DROME;Q7K8Y5_DROME	Spn42Da	IP16419p	68200000	84500000	73800000	75600000	83100000	76500000	66800000	69300000	70800000	68300000	64800000	65500000		76950000	6.75833e+07	0.878276
Q9VQK5	Q9VQK5_DROME	Prp40	LD24714p	79000000	63100000	65500000	86400000	83300000	83800000	77800000	90100000	59100000	71500000	72700000	64500000		76850000	7.26167e+07	0.944914
Q9VRJ9	OTU1_DROME	Yod1	Ubiquitin thioesterase Otu1	67900000	79500000	74800000	77600000	81900000	77900000	73000000	75500000	76000000	77300000	71800000	81000000		76600000	7.57667e+07	0.989121
Q9W247	Q9W247_DROME	Dmel\CG4752	FI03324p	74600000	72500000	78800000	79100000	81900000	72300000	62100000	60700000	67500000	60600000	64900000	62700000		7.65333e+07	6.30833e+07	0.82426
Q8MSW0	Q8MSW0_DROME	IleRS	isoleucine--tRNA ligase	77000000	76000000	78500000	76600000	74400000	76200000	73900000	77300000	75700000	73300000	70800000	69700000		76450000	73450000	0.960759
Q09332	UGGG_DROME	Uggt	UDP-glucose:glycoprotein glucosyltransferase	77800000	73500000	73900000	79200000	77900000	75300000	71800000	77600000	74100000	74900000	72900000	74600000		7.62667e+07	7.43167e+07	0.974432
Q9VCI4	Q9VCI4_DROME	udt	LD32918p	81900000	77000000	71800000	75200000	74800000	76100000	76400000	77100000	80300000	83600000	76800000	80500000		7.61333e+07	7.91167e+07	1.03919
Q86BP1;Q960K8	Q86BP1_DROME;Q960K8_DROME	Hibch	3-hydroxyisobutyryl-CoA hydrolase, mitochondrial	77200000	75600000	77000000	76600000	75900000	73600000	76100000	72900000	76100000	78600000	76300000	72700000		7.59833e+07	75450000	0.992981
A0A0B4KFG2	A0A0B4KFG2_DROME	Pdk	Protein-serine/threonine kinase	82400000	73200000	74400000	74200000	79500000	72100000	81300000	75100000	78700000	81300000	79600000	81000000		7.59667e+07	79500000	1.04651
O61613	NMT_DROME	Nmt	Glycylpeptide N-tetradecanoyltransferase	79900000	66200000	80900000	77200000	76800000	74300000	63400000	66900000	67600000	73700000	71300000	66800000		7.58833e+07	6.82833e+07	0.899846
P25455;P25455-1;P25455-2;P25455-4;P25455-5	PIP1_DROME	Plc21C	1-phosphatidylinositol 4,5-bisphosphate phosphodiesterase classes I and II	75100000	72300000	76500000	77600000	78400000	75200000	79500000	81700000	82100000	82000000	79800000	79600000		75850000	8.07833e+07	1.06504
Q9VAK5	Q9VAK5_DROME	ND-20L	NADH dehydrogenase (Ubiquinone) 20 kDa subunit-like, isoform A	64900000	83500000	75700000	91800000	85200000	53600000	69700000	63300000	57500000	59100000	63200000	61200000		7.57833e+07	6.23333e+07	0.82252
Q7KUC2	Q7KUC2_DROME	Pdxk	Pyridoxal kinase	78500000	68800000	76300000	76600000	74800000	79700000	73900000	70400000	77600000	75900000	77200000	72900000		7.57833e+07	74650000	0.985045
Q24572	CAF1_DROME	Caf1-55	Chromatin assembly factor 1 p55 subunit	73200000	87500000	64200000	60600000	81700000	87500000	83500000	86400000	89900000	88600000	89300000	88600000		7.57833e+07	8.77167e+07	1.15747
Q9W2M2;Q9W2M2-2	TREA_DROME	Treh	Trehalase	76500000	78400000	86300000	71200000	72800000	69000000	70300000	84900000	71100000	71200000	70800000	74700000		75700000	7.38333e+07	0.975341
Q8MLS2	Q8MLS2_DROME	Rpi	ribose-5-phosphate isomerase	66300000	79100000	79800000	74500000	78000000	75300000	78300000	86300000	65400000	79000000	80500000	82300000		75500000	7.86333e+07	1.0415
Q24210	CSKP_DROME	CASK	Peripheral plasma membrane protein CASK	62100000	88300000	84300000	71400000	71300000	75500000	90500000	87200000	94300000	87200000	88400000	93700000		7.54833e+07	9.02167e+07	1.19519
Q8IMG1;Q9V9U3	Q8IMG1_DROME;Q9V9U3_DROME	anon-WO0118547.398;anon-WO0118547.745	Uncharacterized protein, isoform C	80700000	78400000	75700000	68900000	70100000	78600000	74000000	78700000	85400000	82000000	88900000	75000000		75400000	8.06667e+07	1.06985
A0A4D6K426	A0A4D6K426_DROME	rdgC	Serine/threonine-protein phosphatase with EF-hands	80200000	70900000	73400000	88200000	70300000	68700000	78000000	76800000	88700000	82600000	85300000	76200000		7.52833e+07	8.12667e+07	1.07948
Q9VCE0	Q9VCE0_DROME	Pisd	Phosphatidylserine decarboxylase proenzyme, mitochondrial	87300000	71700000	81300000	69800000	67500000	72300000	81100000	84200000	83700000	81300000	94500000	78900000		7.49833e+07	83950000	1.11958
Q9VG28	Q9VG28_DROME	beat-Vc	Beaten path Vc	55800000	59700000	85800000	77600000	107000000	63400000	92500000	98900000	92300000	91300000	102000000	93900000		7.48833e+07	95150000	1.27064
O61305	DDX19_DROME	Dbp80	DEAD-box helicase Dbp80	63100000	78700000	70300000	74300000	81300000	81200000	78200000	74700000	89400000	88400000	84500000	72100000		7.48167e+07	8.12167e+07	1.08554
Q9VTF9	UFD1_DROME	Ufd1	Ubiquitin fusion degradation protein 1 homolog	74800000	74200000	69000000	75600000	78500000	76700000	75600000	76900000	70400000	69800000	74600000	73000000		74800000	7.33833e+07	0.981061
Q95RR6	Q95RR6_DROME	Pur-alpha	LD15002p	77900000	74900000	72700000	80100000	74600000	68400000	69300000	67800000	78100000	76000000	67500000	81500000		7.47667e+07	7.33667e+07	0.981275
Q9VTE5	PFD2_DROME	Pfdn2	Probable prefoldin subunit 2	70900000	81300000	70900000	67800000	69400000	87300000	78200000	76300000	75600000	74700000	77900000	79600000		74600000	77050000	1.03284
P53997	SET_DROME	Set	Protein SET	79100000	72200000	70400000	76500000	73100000	75500000	70300000	73600000	61700000	63900000	70500000	64700000		7.44667e+07	67450000	0.905774
Q9VLS5	Q9VLS5_DROME	Rbsn-5	LD29542p	75000000	69700000	71500000	77200000	77500000	75800000	68500000	78200000	77400000	77500000	75100000	89100000		74450000	7.76333e+07	1.04276
A1ZAK7;A1ZAK8	A1ZAK7_DROME;A1ZAK8_DROME	Psi	LD35640p	79900000	77500000	71600000	70400000	73600000	73200000	75400000	75000000	76000000	75800000	74800000	79000000		7.43667e+07	76000000	1.02196
Q9XZ61	Q9XZ61_DROME	Uch-L5	Ubiquitin carboxyl-terminal hydrolase	77300000	74700000	77500000	77900000	74100000	64600000	98700000	80400000	105000000	102000000	104000000	104000000		74350000	9.90167e+07	1.33176
Q9XYM0	CRK_DROME	Crk	Adapter molecule Crk	73400000	75000000	70300000	80500000	76700000	70000000	77700000	81500000	81900000	83700000	84700000	87300000		7.43167e+07	82800000	1.11415
Q9W543	Q9W543_DROME	Rbcn-3B	Rabconnectin-3B, isoform A	71600000	72000000	74400000	78700000	73300000	75700000	81700000	78900000	75200000	78800000	79300000	86400000		7.42833e+07	80050000	1.07763
P08182;P08182-3	CSK2B_DROME	CkIIbeta	Casein kinase II subunit beta	81200000	71400000	78000000	74700000	66600000	73500000	76500000	69100000	65900000	65300000	65800000	65600000		7.42333e+07	6.80333e+07	0.91648
A0A0B4K7J2;A0A0B4K7J2-2	RBP2_DROME	Nup358	E3 SUMO-protein ligase RanBP2	74700000	68800000	73600000	77700000	71500000	78200000	69200000	76100000	74400000	69100000	70900000	70700000		7.40833e+07	7.17333e+07	0.968279
Q9VXE8	Q9VXE8_DROME	Ubc7	Ubiquitin-conjugating enzyme E2 S	72800000	74200000	71500000	75100000	72800000	78000000	71700000	73400000	64600000	65400000	74100000	68300000		7.40667e+07	6.95833e+07	0.939469
P32234	128UP_DROME	128up	GTP-binding protein 128up	76100000	69200000	71500000	74700000	75900000	76300000	64700000	71500000	63900000	62400000	65400000	70500000		73950000	66400000	0.897904
Q8MLZ7	IDGF3_DROME	Idgf3	Chitinase-like protein Idgf3	79400000	74300000	66600000	67000000	80900000	75300000	63300000	60100000	58300000	66800000	54500000	59500000		7.39167e+07	6.04167e+07	0.817362
Q9VMV5	Q9VMV5_DROME	vkg	Viking, isoform A	77800000	81000000	48500000	55900000	95700000	84000000	78500000	73400000	81600000	95500000	64200000	88300000		7.38167e+07	80250000	1.08715
B7YZL1	B7YZL1_DROME	10737	Uncharacterized protein, isoform O	72500000	71700000	75700000	78400000	74700000	69500000	77300000	73900000	75900000	73700000	70300000	77700000		73750000	74800000	1.01424
Q9VYY3	UBA5_DROME	Uba5	Ubiquitin-like modifier-activating enzyme 5	89800000	63400000	71400000	73700000	80300000	62900000	60100000	65200000	62800000	70000000	65100000	64700000		7.35833e+07	64650000	0.878596
A1ZB68	A1ZB68_DROME	GstE3	FI01423p	72300000	79200000	78300000	68000000	71000000	72700000	73600000	69100000	74500000	70500000	79800000	73900000		7.35833e+07	7.35667e+07	0.999773
Q9VAG9	Q9VAG9_DROME	Dmel\CG7789	3'(2'),5'-bisphosphate nucleotidase 1	76700000	82600000	69700000	67700000	62200000	82300000	86400000	79300000	83600000	82900000	82700000	75400000		7.35333e+07	8.17167e+07	1.11129
Q8T079	GLYR1_DROME	Ndf	Cytokine-like nuclear factor N-PAC	89900000	70700000	71800000	71700000	69800000	67100000	68700000	69800000	65900000	66600000	69500000	62900000		73500000	6.72333e+07	0.914739
E2QD99	E2QD99_DROME	CG3960	Uncharacterized protein, isoform I	66500000	72300000	71500000	68900000	74400000	86400000	80400000	69000000	77400000	79300000	72900000	76400000		7.33333e+07	75900000	1.035
A8DYJ7;A8DYJ6;B7YZM1	A8DYJ6_DROME;A8DYJ7_DROME;B7YZM1_DROME	side-VIII	Sidestep VIII, isoform B	65500000	87300000	68300000	70500000	72800000	75600000	93200000	89400000	97400000	88100000	94100000	95000000		7.33333e+07	9.28667e+07	1.26636
Q9VM33	EFGM_DROME	mEFG1	Elongation factor G, mitochondrial	80200000	68500000	72200000	73900000	75600000	68900000	73700000	76900000	64000000	67000000	67900000	74700000		7.32167e+07	70700000	0.965627
P22817	IDE_DROME	Ide	Insulin-degrading enzyme	74500000	69800000	73400000	77500000	73900000	69600000	75500000	79000000	76100000	82000000	81400000	81600000		7.31167e+07	7.92667e+07	1.08411
Q8IH23	Q8IH23_DROME	CG13335	GEO02102p1	72100000	65200000	76300000	89700000	76200000	58800000	63700000	67800000	59500000	68400000	70000000	62200000		73050000	6.52667e+07	0.893452
Q9V3W9	Q9V3W9_DROME	Rad23	UV excision repair protein RAD23	74300000	64700000	71900000	77400000	70800000	79100000	70300000	69900000	74100000	73400000	67300000	69800000		7.30333e+07	70800000	0.96942
O96692	O96692_DROME	Rap2l	RE63021p	74600000	73000000	73500000	72600000	75300000	68500000	72600000	82800000	73900000	76600000	75600000	81900000		7.29167e+07	7.72333e+07	1.0592
P35220	CTNA_DROME	alpha-Cat	Catenin alpha	70800000	72300000	74500000	76700000	73000000	69800000	68700000	72000000	70700000	74300000	68600000	73200000		72850000	71250000	0.978037
Q9V460	SPT5H_DROME	Spt5	Transcription elongation factor SPT5	74500000	71900000	68100000	70300000	74000000	78200000	69700000	73700000	72800000	76100000	73800000	72500000		7.28333e+07	73100000	1.00366
Q7K010	Q7K010_DROME	Tsp42Ef	Tetraspanin	70500000	68500000	80500000	81500000	74900000	61000000	63900000	94400000	62400000	77000000	73700000	78100000		7.28167e+07	7.49167e+07	1.02884
A0A0B7P9G0	UEX_DROME	uex	Unextended protein	68700000	67100000	72800000	77900000	71500000	78900000	77800000	77700000	77000000	78800000	81100000	81400000		7.28167e+07	7.89667e+07	1.08446
Q7KNS3	LIS1_DROME	Lis-1	Lissencephaly-1 homolog	79100000	72100000	69100000	68800000	73500000	72700000	74100000	79800000	73400000	65200000	72400000	73300000		72550000	7.30333e+07	1.00666
Q24192	RHOL_DROME	RhoL	Ras-like GTP-binding protein RhoL	73200000	69600000	76400000	74200000	71300000	70300000	80100000	85600000	82400000	82700000	83200000	74900000		72500000	8.14833e+07	1.12391
Q94883	Q94883_DROME	Dref	DNA replication-related element factor, isoform A	75700000	71400000	70900000	75100000	72400000	69300000	73600000	71700000	73800000	71900000	77200000	71600000		7.24667e+07	73300000	1.0115
A0A0B4K7W1	A0A0B4K7W1_DROME	scrib	Scribble, isoform Q	73600000	69900000	73200000	73000000	71500000	73100000	73600000	76900000	78800000	75600000	75300000	74600000		7.23833e+07	75800000	1.0472
Q9VCA9	SPCS3_DROME	Spase22-23	Signal peptidase complex subunit 3	77200000	70100000	72600000	87900000	65100000	61300000	53600000	74300000	47500000	44900000	49400000	49700000		7.23667e+07	5.32333e+07	0.735606
O44437	SMD3_DROME	SmD3	Small nuclear ribonucleoprotein Sm D3	82600000	74800000	65800000	70800000	72200000	68000000	65900000	66100000	61900000	63800000	65600000	68700000		7.23667e+07	6.53333e+07	0.90281
Q24185	HOOK_DROME	hook	Protein hook	69800000	74800000	69500000	71900000	65600000	82400000	74000000	69200000	74000000	73500000	72900000	77300000		7.23333e+07	7.34833e+07	1.0159
Q8T6B9	PUF68_DROME	hfp	Poly(U)-binding-splicing factor half pint	74200000	67200000	69300000	74600000	73300000	74900000	64700000	72100000	68100000	67700000	72100000	70300000		72250000	6.91667e+07	0.957324
Q9VM69	Q9VM69_DROME	nop5	CG10206-PA	77800000	69600000	72200000	73000000	71200000	69600000	57600000	68400000	62200000	56800000	58200000	61400000		7.22333e+07	6.07667e+07	0.841255
Q9VMC9	KFA_DROME	KFase	Kynurenine formamidase	74600000	70600000	72200000	73000000	70600000	72100000	69800000	67100000	69400000	73000000	71300000	69700000		7.21833e+07	70050000	0.970446
Q9W425	Q9W425_DROME	Rbcn-3A	Rabconnectin-3A	76600000	70800000	74400000	70800000	71100000	69000000	74500000	76300000	73100000	68700000	72900000	72200000		7.21167e+07	72950000	1.01156
E2QD26	E2QD26_DROME	Ppcs	Phosphopantothenoylcysteine synthetase, isoform C	73800000	68700000	71600000	70500000	67200000	80600000	78300000	79000000	86000000	78600000	86200000	80600000		7.20667e+07	81450000	1.1302
Q0E8P5	Q0E8P5_DROME	Dmel\CG5758	FI05614p	69100000	68100000	75000000	77600000	71000000	71100000	71100000	72900000	69400000	79400000	74200000	74100000		7.19833e+07	7.35167e+07	1.0213
A0AQH0	A0AQH0_DROME	Prosbeta1	Proteasome subunit beta	64300000	92200000	71800000	62800000	64000000	76300000	77500000	70100000	81700000	77800000	71600000	69100000		71900000	7.46333e+07	1.03802
Q9VQQ6	Q9VQQ6_DROME	Snx1	FI18122p1	73600000	70800000	65800000	76100000	73800000	71100000	71800000	71000000	77400000	73800000	72800000	74900000		7.18667e+07	7.36167e+07	1.02435
Q95R98	Q95R98_DROME	Dmel\CG5068	Protein phosphatase methylesterase 1	71300000	63300000	69100000	77100000	73200000	76400000	80500000	72800000	76300000	72700000	76500000	71900000		7.17333e+07	7.51167e+07	1.04717
P54367	KC1A_DROME	CkIalpha	Casein kinase I isoform alpha	76200000	75800000	75200000	82300000	63400000	57400000	76400000	68500000	83500000	88400000	83800000	82200000		7.17167e+07	8.04667e+07	1.12201
Q9VLE1	Q9VLE1_DROME	Dmel\CG13108	RH63449p	79800000	70200000	68000000	71600000	75700000	64900000	58900000	68200000	69200000	66400000	68900000	72800000		71700000	67400000	0.940028
Q95SH2	Q95SH2_DROME	Chmp1	Charged multivesicular body protein 1, isoform A	62600000	67000000	73800000	69500000	75700000	80700000	83500000	75300000	86900000	73900000	72200000	79100000		71550000	7.84833e+07	1.0969
Q7KNF2	PABP2_DROME	Pabp2	Polyadenylate-binding protein 2	82900000	79800000	69400000	68600000	64900000	63000000	76600000	69600000	69800000	65100000	69600000	79100000		7.14333e+07	7.16333e+07	1.0028
A1Z7P1	A1Z7P1_DROME	Pgm2a	Phosphoglucomutase 2a	72800000	75200000	70800000	73500000	69000000	67200000	66900000	68500000	68200000	65200000	64900000	63800000		7.14167e+07	66250000	0.927655
Q9V426	Q9V426_DROME	vig	LD07162p	51700000	72700000	75900000	63800000	77800000	86600000	78900000	70600000	62600000	60400000	71000000	77100000		7.14167e+07	70100000	0.981564
Q9VGE7	Q9VGE7_DROME	Ect3	Beta-galactosidase	75100000	72700000	62200000	65800000	75000000	77100000	47200000	55600000	43800000	51500000	53100000	48300000		7.13167e+07	4.99167e+07	0.69993
Q9V3V0;Q9V3V0-2	SRSF7_DROME	x16	Serine/arginine-rich splicing factor x16	70400000	68900000	73000000	76400000	68200000	70700000	79900000	73000000	83000000	83500000	78700000	83500000		7.12667e+07	8.02667e+07	1.12629
Q9VUR0	UFSP2_DROME	Ufsp2	Probable Ufm1-specific protease 2	80700000	67900000	67600000	73900000	70500000	66100000	55800000	60200000	53900000	63500000	63100000	57800000		7.11167e+07	59050000	0.830326
Q9VX35;X2JFW6	Q9VX35_DROME;X2JFW6_DROME	CC4;Dmel\CG8289	LD36501p	72600000	63400000	82000000	66300000	74400000	67700000	54000000	71200000	53300000	43100000	52500000	56700000		7.10667e+07	5.51333e+07	0.775797
Q95TL8;Q9VXI3	Q95TL8_DROME;Q9VXI3_DROME	ERp44	LD41494p	71600000	64400000	68100000	77800000	72800000	70700000	65800000	69200000	64400000	68700000	68800000	69900000		70900000	67800000	0.956276
E2QCN9	E2QCN9_DROME	Gs1l	GS1-like, isoform B	70500000	76200000	68300000	62800000	77900000	69300000	84200000	64200000	87200000	87800000	83500000	76400000		7.08333e+07	80550000	1.13718
Q9VZE2	Q9VZE2_DROME	Dmel\CG15012	GEO04055p1	67800000	88100000	70100000	60900000	60800000	76300000	93700000	74200000	80500000	88000000	86000000	77600000		7.06667e+07	8.33333e+07	1.17925
Q9VF86	Q9VF86_DROME	Nagk	N-acetyl-D-glucosamine kinase	72700000	76900000	68300000	70000000	67400000	68600000	73700000	73500000	74300000	75800000	75700000	79200000		70650000	7.53667e+07	1.06676
A0A126GUV7;Q7KSD3	A0A126GUV7_DROME;Q7KSD3_DROME	fray	non-specific serine/threonine protein kinase	71500000	84600000	61300000	69300000	66600000	70300000	78000000	70600000	75200000	73200000	74200000	75200000		70600000	74400000	1.05382
Q9VQR9	Q9VQR9_DROME	Dmel\CG17593	PAT complex subunit CCDC47	62200000	68100000	71400000	78300000	72500000	70300000	68400000	72800000	67800000	73300000	73400000	74900000		7.04667e+07	7.17667e+07	1.01845
Q9W127	Q9W127_DROME	Dmel\CG3663	Isochorismatase domain-containing protein 1	77700000	59200000	76100000	70000000	70600000	68800000	67500000	66200000	58400000	63700000	65200000	65500000		70400000	6.44167e+07	0.915009
Q9V9T5	Q9V9T5_DROME	Mccc1	GM14617p	63300000	66400000	74300000	68700000	70200000	79000000	63400000	62600000	65400000	69000000	68400000	57400000		7.03167e+07	6.43667e+07	0.915383
O62621	COPB2_DROME	beta'COP	Coatomer subunit beta'	71100000	65800000	70600000	71500000	70500000	72200000	67800000	72100000	67700000	68300000	70900000	70800000		7.02833e+07	69600000	0.990277
Q9VQX4-2	PNCB_DROME	Naprt	Isoform 2 of Nicotinate phosphoribosyltransferase	76900000	70600000	70800000	72200000	68000000	63000000	71500000	70200000	74200000	71500000	69600000	68300000		70250000	7.08833e+07	1.00902
Q7K2N3	Q7K2N3_DROME	MFS9	GH23975p	71000000	70100000	70100000	70200000	66100000	73600000	56900000	59800000	60800000	63400000	62100000	64300000		7.01833e+07	6.12167e+07	0.872239
P23226;P23226-3	MA205_DROME	Map205	205 kDa microtubule-associated protein	68400000	69200000	70900000	70000000	71500000	70700000	68600000	71400000	72700000	73800000	69300000	66300000		7.01167e+07	70350000	1.00333
A0A0B4LGY1;A0A0B4LGZ0;A0A0B4LI11;E1JIH2;E1JIH3;Q9VH91	A0A0B4LGY1_DROME;A0A0B4LGZ0_DROME;A0A0B4LI11_DROME;E1JIH2_DROME;E1JIH3_DROME;Q9VH91_DROME	Unc-115a	Uncoordinated 115a, isoform G	76800000	60000000	81800000	71600000	71000000	58900000	67700000	66900000	55100000	57900000	62000000	73700000		7.00167e+07	6.38833e+07	0.912402
P10090	WHITE_DROME	w	Protein white	78200000	71900000	80300000	75200000	59300000	55000000	66900000	63200000	67400000	69900000	68400000	60900000		6.99833e+07	6.61167e+07	0.944749
Q9W3R0	Q9W3R0_DROME	rumpel	FI02094p	67600000	70200000	67700000	74600000	68900000	70800000	67800000	66100000	70200000	67800000	72700000	67900000		6.99667e+07	68750000	0.982611
P48598-2	IF4E_DROME	eIF4E1	Isoform II of Eukaryotic translation initiation factor 4E1	64200000	77500000	68400000	67900000	65400000	76400000	72400000	71600000	73000000	75700000	66500000	69200000		6.99667e+07	71400000	1.02049
E1JGN0	E1JGN0_DROME	par-1	non-specific serine/threonine protein kinase	68100000	65200000	70700000	76300000	69100000	70000000	64600000	64900000	73900000	70500000	69300000	70300000		69900000	6.89167e+07	0.985932
Q9W0Y1	TINA1_DROME	Tina-1	Troponin C-akin-1 protein	68400000	71700000	68700000	61400000	69500000	78100000	90200000	85600000	94000000	76100000	76700000	83000000		6.96333e+07	8.42667e+07	1.21015
Q9W3H4	Q9W3H4_DROME	sni	LD36273p	73200000	65000000	73400000	72200000	66800000	67100000	70400000	67400000	70500000	70400000	67700000	70400000		6.96167e+07	6.94667e+07	0.997845
Q9VXN2;Q9VXN2-2	SUN_DROME	sun	Protein stunted	50900000	86800000	66100000	65800000	67000000	80900000	83000000	85400000	94900000	91500000	77600000	82300000		6.95833e+07	8.57833e+07	1.23281
A1ZAB5	CLU_DROME	clu	Protein clueless	72400000	68900000	71200000	65500000	66400000	72100000	68600000	68400000	68300000	72200000	65400000	68100000		6.94167e+07	68500000	0.986795
Q9VMH8	Q9VMH8_DROME	Pfdn1	GEO07746p1	77800000	63800000	64400000	69900000	71500000	68400000	59300000	74200000	62400000	63200000	67200000	75500000		69300000	6.69667e+07	0.96633
O77425	O77425_DROME	Dmel\CG13369	Ribokinase	72700000	59400000	71700000	79100000	69800000	62900000	38300000	56100000	47000000	48600000	51600000	45100000		6.92667e+07	4.77833e+07	0.689846
Q9VI66	Q9VI66_DROME	CG2640	GH28833p	66600000	67900000	77500000	79800000	63400000	60100000	67400000	72100000	70800000	70400000	68900000	71000000		6.92167e+07	70100000	1.01276
A0A0B4KG94;Q9VGJ6	A0A0B4KG94_DROME;Q9VGJ6_DROME	Dmel\CG6908	Uncharacterized protein, isoform B	65400000	80400000	68600000	63800000	62700000	72800000	67500000	59100000	55500000	55100000	61200000	63000000		68950000	6.02333e+07	0.87358
Q9VFS1	Q9VFS1_DROME	Adgf-D	adenosine deaminase	64700000	71600000	71300000	71000000	70000000	64600000	75400000	74100000	71300000	68900000	74300000	79300000		6.88667e+07	7.38833e+07	1.07285
Q960Y8	Q960Y8_DROME	alt	Aluminum tubes, isoform G	65200000	68300000	71700000	66300000	64500000	76600000	67000000	63500000	73500000	66000000	70600000	67400000		6.87667e+07	68000000	0.988851
Q9VPY7	Q9VPY7_DROME	Dmel\CG5126	LD42035p	73400000	74800000	71700000	62600000	61400000	68700000	72000000	67500000	71000000	72300000	65900000	69700000		6.87667e+07	6.97333e+07	1.01406
Q7JQR3	Q7JQR3_DROME	Qsox1	Sulfhydryl oxidase	74500000	73300000	68500000	59500000	71000000	63600000	49700000	54200000	53800000	49500000	48800000	49400000		68400000	50900000	0.744152
M9PJN5;M9NGF7;Q86NK9;Q8IR37;Q8IR38	M9NGF7_DROME;M9PJN5_DROME;Q86NK9_DROME;Q8IR37_DROME;Q8IR38_DROME	HDAC6	Histone deacetylase 6, isoform E	80800000	64400000	75300000	65000000	61500000	63400000	60800000	60500000	58900000	67700000	64200000	59100000		68400000	6.18667e+07	0.904483
Q9VM11	Q9VM11_DROME	Dmel\CG5973	HL01515p	63400000	67800000	71100000	70900000	69300000	67900000	71700000	59100000	70100000	69700000	74900000	70600000		68400000	69350000	1.01389
A1Z7H7	A1Z7H7_DROME	Dmel\CG8586	FI19801p1	73900000	75900000	65100000	64500000	68100000	62700000	53200000	54500000	50400000	49900000	45000000	48700000		6.83667e+07	5.02833e+07	0.735495
Q9Y0Y5	Q9Y0Y5_DROME	epsilonCOP	Coatomer subunit epsilon	68000000	66000000	67300000	70600000	68100000	70000000	72900000	77600000	72600000	67700000	69400000	68100000		6.83333e+07	7.13833e+07	1.04463
Q9XZ14	GOE_DROME	goe	Protein gone early	68200000	65200000	73400000	73700000	69000000	59900000	60900000	62700000	63500000	60900000	60600000	64900000		6.82333e+07	62250000	0.912311
Q9W3T9	Q9W3T9_DROME	Dmel\CG3040	GM01152p	74600000	67200000	67900000	70100000	67900000	61700000	61800000	68500000	61500000	64200000	64500000	68900000		6.82333e+07	64900000	0.951148
A0A0B4K7X5;A0A0B4LFW5	A0A0B4K7X5_DROME;A0A0B4LFW5_DROME	Gyg	glycogenin glucosyltransferase	64900000	99000000	74000000	59800000	51200000	60200000	62500000	51600000	69200000	55900000	54300000	59000000		6.81833e+07	58750000	0.861648
Q9VCK6	Q9VCK6_DROME	Dmel\CG10184	LD34157p	67300000	57300000	74600000	67000000	70100000	72500000	46400000	50700000	50700000	55100000	55900000	50100000		6.81333e+07	5.14833e+07	0.755626
Q7KS34	Q7KS34_DROME	Dmel\CG31140	Diacylglycerol kinase	63000000	68000000	70800000	67200000	70100000	69700000	78600000	78100000	79500000	77000000	75500000	81000000		6.81333e+07	7.82833e+07	1.14897
E1JGP3;E1JGP4	E1JGP3_DROME;E1JGP4_DROME	RIC-3	RIC3 acetylcholine receptor chaperone, isoform H	57400000	70700000	75400000	66400000	68200000	69300000	82800000	75600000	79600000	79600000	78400000	80700000		67900000	79450000	1.1701
Q9VXE4	Q9VXE4_DROME	Dmel\CG9782	RE04467p	82800000	48200000	49400000	71100000	76900000	78400000	55700000	66900000	63300000	65900000	54100000	66900000		67800000	6.21333e+07	0.916421
Q9VHY6	Q9VHY6_DROME	EMC1	ER membrane protein complex subunit 1	65200000	68100000	66200000	66000000	70000000	71100000	67700000	69400000	66800000	70400000	65900000	74300000		6.77667e+07	6.90833e+07	1.01943
O76874	O76874_DROME	EG:125H10.1	SD17974p	68000000	69600000	59800000	67500000	65500000	76000000	50200000	55000000	61000000	60500000	47500000	53300000		6.77333e+07	5.45833e+07	0.805856
Q9VBQ5	Q9VBQ5_DROME	Dmel\CG5112	LD38433p	69700000	62100000	65600000	72000000	72200000	64800000	64300000	69000000	67500000	68400000	63600000	66800000		6.77333e+07	66600000	0.983268
P40796	LA_DROME	La	La protein homolog	73300000	72300000	67200000	69500000	60700000	62600000	76900000	68300000	81800000	77300000	78800000	75300000		67600000	76400000	1.13018
Q24498-4;Q24498-5	RYR_DROME	RyR	Isoform C of Ryanodine receptor	64500000	72300000	69200000	67000000	63900000	68500000	65500000	63200000	66600000	61600000	62800000	66300000		6.75667e+07	6.43333e+07	0.952146
Q9VKS1	Q9VKS1_DROME	CT22515	RE24635p	55800000	72600000	68100000	67100000	71500000	70300000	72600000	73500000	72900000	68200000	59200000	56700000		6.75667e+07	6.71833e+07	0.994327
Q9VWH7;X2JED9;Q0KHQ6	Q0KHQ6_DROME;Q9VWH7_DROME;X2JED9_DROME	Pfrx	6-phosphofructo-2-kinase, isoform A	69900000	69000000	78800000	64800000	59400000	63200000	72900000	65300000	65900000	63200000	63200000	65400000		6.75167e+07	6.59833e+07	0.97729
P48609	CDK5_DROME	Cdk5	Cyclin-dependent kinase 5 homolog	66200000	66300000	64900000	69400000	77800000	60500000	71200000	69700000	72900000	79000000	75500000	76000000		6.75167e+07	74050000	1.09677
P52302	MBN_DROME	l(3)mbn	Protein lethal(3)malignant blood neoplasm 1	60400000	70000000	50500000	57000000	92700000	74300000	61600000	54300000	65800000	86300000	58700000	82100000		6.74833e+07	6.81333e+07	1.00963
A0A0B4JD97;A0A0B4KFK1;Q86BB5;Q95TU9;A0A0B4JCV4;A0A0B4K6I7;Q8IPN1;Q9VN51	A0A0B4JCV4_DROME;A0A0B4JD97_DROME;A0A0B4K6I7_DROME;A0A0B4KFK1_DROME;Q86BB5_DROME;Q8IPN1_DROME;Q95TU9_DROME;Q9VN51_DROME	tacc	Transforming acidic coiled-coil protein, isoform J	78100000	67100000	66700000	66100000	65100000	61400000	63600000	64900000	68600000	70000000	71900000	65600000		6.74167e+07	6.74333e+07	1.00025
A1Z9A8	PTCD3_DROME	CG4679	Small ribosomal subunit protein mS39	67300000	65700000	64700000	66300000	67700000	72600000	64700000	68500000	69100000	68200000	69400000	67900000		6.73833e+07	6.79667e+07	1.00866
Q9VDU1	Q9VDU1_DROME	Acsx3	Luciferin 4-monooxygenase	68200000	69100000	63400000	66300000	77600000	58900000	63600000	60600000	60700000	67200000	63600000	64800000		67250000	6.34167e+07	0.942999
Q9VNE2	PKRA_DROME	kra	Protein krasavietz	68000000	71000000	66200000	66000000	61100000	70800000	67100000	61500000	64300000	67800000	64500000	64400000		6.71833e+07	6.49333e+07	0.96651
Q9VA71	Q9VA71_DROME	Q9VA71	FI19924p1	78500000	67200000	64500000	62800000	70000000	60000000	50800000	64900000	52800000	41000000	50600000	54600000		6.71667e+07	52450000	0.780893
Q9VR47	Q9VR47_DROME	hoe1	FI04465p	66500000	69400000	68400000	62800000	62200000	73700000	78800000	59800000	84100000	79300000	71900000	68200000		6.71667e+07	7.36833e+07	1.09702
Q8IQV9;Q8IQV9-2	NU205_DROME	Nup205	Nuclear pore complex protein Nup205	74400000	67200000	69500000	67200000	62400000	61700000	64600000	74000000	61700000	57000000	63300000	58200000		6.70667e+07	6.31333e+07	0.941352
Q86P18	Q86P18_DROME	osy	RE14039p	61400000	67300000	63200000	68900000	71800000	69300000	65300000	66500000	67600000	64800000	70700000	79500000		6.69833e+07	6.90667e+07	1.0311
Q9VEK8	Q9VEK8_DROME	sds22	Dynein axonemal assembly factor 1 homolog	66800000	64900000	66400000	72700000	72000000	59000000	64300000	64200000	71600000	68600000	68500000	64600000		6.69667e+07	6.69667e+07	1
Q9VC57	ATLAS_DROME	atl	Atlastin	61900000	70300000	68900000	63700000	68700000	68200000	85300000	68900000	77000000	78200000	76600000	70400000		66950000	7.60667e+07	1.13617
Q9W3Q0	Q9W3Q0_DROME	Rab39	FI07418p	69300000	63600000	65200000	66600000	71200000	65500000	60500000	69200000	62300000	61100000	64200000	68200000		66900000	64250000	0.960389
A1Z9J6	A1Z9J6_DROME	mRpL53	Large ribosomal subunit protein mL53	69300000	69600000	65600000	71000000	67700000	58100000	67000000	63500000	74000000	71900000	62800000	65900000		6.68833e+07	6.75167e+07	1.00947
Q86BR8;Q9VDL2	Q86BR8_DROME;Q9VDL2_DROME	TFAM	Mitochondrial transcription factor A, isoform B	64000000	64700000	67100000	68200000	70600000	66600000	69300000	65900000	67400000	68000000	66100000	71100000		6.68667e+07	6.79667e+07	1.01645
Q9VII5	Q9VII5_DROME	Dmel\CG31676	GEO08323p1	71400000	68800000	65400000	62800000	67600000	65100000	60000000	60400000	57300000	63100000	54300000	64600000		66850000	59950000	0.896784
Q8IPU3;Q9I7P8;Q9VPB3	Q8IPU3_DROME;Q9I7P8_DROME;Q9VPB3_DROME	tzn	hydroxyacylglutathione hydrolase	70000000	65900000	70700000	65400000	61100000	66400000	66900000	64900000	72000000	73100000	68000000	62600000		6.65833e+07	6.79167e+07	1.02003
Q9VPR2	Q9VPR2_DROME	uncNacbeta	Transcription factor BTF3	57000000	71800000	61000000	60700000	65300000	82900000	63500000	59300000	78400000	77300000	69700000	71200000		66450000	69900000	1.05192
Q9VRE0	Q9VRE0_DROME	Stt3A	Dolichyl-diphosphooligosaccharide--protein glycosyltransferase subunit STT3A	62100000	67100000	75900000	70500000	58600000	64300000	65000000	61200000	59000000	57400000	60300000	59500000		6.64167e+07	60400000	0.90941
Q7YU24	MARF_DROME	Marf	Transmembrane GTPase Marf	71700000	67700000	68000000	59900000	62500000	68400000	65300000	64700000	63900000	64200000	62400000	61000000		6.63667e+07	6.35833e+07	0.958061
A1Z7J6	A1Z7J6_DROME	Sec31	Secretory 31, isoform B	69600000	66100000	68600000	68100000	64400000	61400000	63600000	68900000	66100000	65800000	68300000	65900000		6.63667e+07	6.64333e+07	1.001
Q9V3N1	SP27A_DROME	Spn27A	Serine protease inhibitor 27A	69700000	71800000	59700000	66100000	66600000	63600000	57100000	57200000	57700000	57900000	58100000	58800000		66250000	57800000	0.872453
Q8IQU1	Q8IQU1_DROME	verm	LD36620p	83700000	57900000	64100000	69000000	66900000	55600000	56000000	61000000	47800000	50000000	52600000	52700000		66200000	53350000	0.805891
Q9VDH5	Q9VDH5_DROME	KaiR1D	Kainate-type ionotropic glutamate receptor subunit 1D	65900000	67700000	63300000	66900000	67900000	65300000	72400000	67600000	68300000	69700000	67500000	61500000		6.61667e+07	6.78333e+07	1.02519
O76895	O76895_DROME	arg	Arginase	81200000	62300000	65400000	62200000	60800000	65000000	48100000	66300000	59800000	63400000	56400000	51400000		66150000	5.75667e+07	0.870244
Q8IPD8	Q8IPD8_DROME	Cpr30F	Cuticular protein 30F	84500000	45100000	68000000	68400000	63400000	67300000	60000000	39900000	64800000	58900000	47800000	59000000		6.61167e+07	5.50667e+07	0.832871
F0JAQ9;M9PF27;M9PFH0;Q95SE8;Q9VU19	F0JAQ9_DROME;M9PF27_DROME;M9PFH0_DROME;Q95SE8_DROME;Q9VU19_DROME	Wbp2	MIP27169p	73000000	56500000	69000000	70400000	65000000	62300000	66700000	71100000	60100000	56300000	65900000	59600000		6.60333e+07	6.32833e+07	0.958354
P05303	EF1A2_DROME	eEF1alpha2	Elongation factor 1-alpha 2	65100000	62600000	74700000	62900000	67100000	63500000	57900000	68800000	65900000	65800000	65700000	61500000		6.59833e+07	6.42667e+07	0.973983
Q9VX31	INT2_DROME	IntS2	Integrator complex subunit 2	57500000	71500000	61200000	68100000	65700000	70500000	87700000	92300000	81400000	84200000	92800000	90500000		65750000	88150000	1.34068
Q9VW19	Q9VW19_DROME	Dmel\CG9372	RE17417p	72500000	69100000	58200000	65500000	72600000	56400000	56500000	58000000	52700000	52400000	54300000	53800000		6.57167e+07	5.46167e+07	0.831093
Q94915	REG2_DROME	Reg-2	Rhythmically expressed gene 2 protein	74800000	67400000	76300000	67600000	56700000	51000000	75600000	66200000	77200000	70700000	78700000	69500000		6.56333e+07	7.29833e+07	1.11199
Q9V9J3	SRC42_DROME	Src42A	Tyrosine-protein kinase Src42A	67100000	65100000	62400000	68600000	67500000	63000000	75000000	71100000	79800000	77200000	74900000	80200000		6.56167e+07	7.63667e+07	1.16383
Q9VVN2	RT26_DROME	mRpS26	Small ribosomal subunit protein mS26	59400000	74800000	63500000	63000000	58300000	73400000	56000000	45400000	45900000	67700000	55300000	50700000		65400000	53500000	0.818043
Q7KNM2	Q7KNM2_DROME	lwr	Dorsal interacting protein 4	55400000	79400000	65100000	60600000	61600000	69900000	75000000	83600000	84700000	73700000	84300000	72400000		6.53333e+07	78950000	1.20842
Q9VRR3	Q9VRR3_DROME	CG10727	Uncharacterized protein, isoform A	66600000	64500000	62900000	65700000	68500000	63600000	66900000	62600000	60100000	71900000	63200000	65700000		65300000	6.50667e+07	0.996427
Q04448;Q04448-2	MTDC_DROME	Nmdmc	Bifunctional methylenetetrahydrofolate dehydrogenase/cyclohydrolase, mitochondrial	64400000	67000000	58300000	68300000	67400000	66200000	58000000	67100000	67500000	69100000	67300000	62100000		6.52667e+07	6.51833e+07	0.998723
Q4V6M1	Q4V6M1_DROME	Datp	Bis(5'-nucleosyl)-tetraphosphatase [asymmetrical]	70800000	69300000	65400000	60700000	61200000	64200000	69800000	67800000	66600000	66900000	66200000	66100000		6.52667e+07	6.72333e+07	1.03013
Q9VZZ6	Q9VZZ6_DROME	BcDNA:RE30174	CG16985 protein	71100000	72100000	63000000	60200000	51000000	73200000	58400000	57200000	66900000	71600000	63300000	58900000		65100000	6.27167e+07	0.96339
Q9VVK7	Q9VVK7_DROME	NUCB1	Nucleobindin 1	56200000	67700000	67200000	65300000	66000000	67900000	69500000	62500000	68300000	65600000	63800000	63000000		65050000	65450000	1.00615
P07668;P07668-2	CLAT_DROME	ChAT	Choline O-acetyltransferase	62700000	64600000	66400000	61800000	69100000	64500000	72500000	69500000	72000000	69300000	71000000	73500000		64850000	71300000	1.09946
Q9VHG4	RENR_DROME	ATP6AP2	ATPase H(+)-transporting accessory protein 2	65100000	59800000	68400000	64700000	68000000	63000000	56400000	57600000	57200000	60100000	56000000	63300000		6.48333e+07	5.84333e+07	0.901285
A0A0B4KHB2	A0A0B4KHB2_DROME	CtBP	C-terminal binding protein, isoform G	70700000	59600000	56800000	65400000	70500000	65900000	65900000	61300000	68100000	61400000	60800000	67700000		6.48167e+07	64200000	0.990486
M9NF32;Q9V3K7	M9NF32_DROME;Q9V3K7_DROME	BG:DS09217.4	Leucine carboxyl methyltransferase 1	67800000	62000000	59800000	64300000	64100000	70900000	72400000	67200000	66300000	70900000	66800000	71400000		6.48167e+07	6.91667e+07	1.06711
O76879	CCCP_DROME	dyw	Circadian clock-controlled protein daywake	68000000	60200000	59700000	56300000	74100000	70500000	43600000	42100000	48500000	53000000	46200000	48400000		64800000	4.69667e+07	0.724794
A1Z713	VPS13_DROME	Vps13	Intermembrane lipid transfer protein Vps13	58600000	64700000	65900000	65300000	66400000	67700000	72800000	68700000	73500000	72800000	72400000	73100000		6.47667e+07	7.22167e+07	1.11503
A0A0S0WGZ0;M9PHI5;Q8IQ62	A0A0S0WGZ0_DROME;M9PHI5_DROME;Q8IQ62_DROME	sif	Still life, isoform Q	70700000	66900000	72700000	75300000	50100000	52700000	68900000	55300000	70700000	77700000	67500000	68900000		6.47333e+07	6.81667e+07	1.05304
Q9VM97	Q9VM97_DROME	Tsp	Thrombospondin, isoform A	66100000	64000000	58800000	62600000	67600000	69200000	57700000	58500000	61100000	62500000	57700000	64700000		6.47167e+07	6.03667e+07	0.932784
M9NGX5;Q9W2Z7	M9NGX5_DROME;Q9W2Z7_DROME	CG12649;CG18512	Uncharacterized protein, isoform G	55000000	69900000	58700000		58900000	80200000	139000000	94900000	84100000	105000000	95100000	185000000		64540000	1.17183e+08	1.81567
Q9VUQ7	Q9VUQ7_DROME	Dmel\CG7739	RE36966p	55700000	61400000	66000000	74900000	68500000	60700000	68300000	66600000	64700000	64900000	59300000	69000000		6.45333e+07	6.54667e+07	1.01446
A8Y4V5	A8Y4V5_DROME	CG40498-RF	FI20903p1	63900000	64300000	62700000	58400000	68800000	68600000	62700000	72200000	64800000	65600000	62900000	68900000		64450000	6.61833e+07	1.02689
Q8T9B6	MESD_DROME	boca	LDLR chaperone boca	65200000	58600000	66100000	66200000	68300000	62200000	58800000	64400000	61300000	72800000	62700000	62300000		6.44333e+07	6.37167e+07	0.988877
Q9VIF2	Q9VIF2_DROME	Pld3	GM01519p	60000000	68000000	65900000	63400000	70000000	58500000	63700000	60300000	61900000	65800000	68200000	66800000		64300000	64450000	1.00233
Q9VXP3	Q9VXP3_DROME	mRpS30	GH05406p	57600000	68400000	66500000	62700000	63700000	66500000	57200000	50000000	57200000	60300000	51700000	56000000		6.42333e+07	55400000	0.862481
Q9VVI9	CHMP5_DROME	Vps60	Charged multivesicular body protein 5	64300000	60100000	67900000	65800000	72100000	54900000	48800000	69000000	55300000	50600000	52700000	59600000		6.41833e+07	56000000	0.872501
P45888-2	ARP2_DROME	Arp2	Isoform A of Actin-related protein 2	75600000	64500000	61700000	62000000	60700000	60500000	65900000	64900000	64500000	69400000	65900000	63100000		6.41667e+07	6.56167e+07	1.0226
A0A0B4KFK4;A0A0B4KFP1;Q0KI92;Q9VH17	A0A0B4KFK4_DROME;A0A0B4KFP1_DROME;Q0KI92_DROME;Q9VH17_DROME	CG12815;Dmel\CG12814	Uncharacterized protein, isoform E	64500000	62200000	67000000	64800000	72100000	53800000	51300000	57000000	52200000	53400000	54800000	54800000		6.40667e+07	5.39167e+07	0.841571
Q9XYZ5	DDB1_DROME	pic	DNA damage-binding protein 1	65400000	63500000	64700000	67100000	63600000	59800000	63500000	55700000	71200000	70000000	66400000	65200000		6.40167e+07	6.53333e+07	1.02057
Q0E8H9;Q8IRB6	Q0E8H9_DROME;Q8IRB6_DROME	Hexo1	beta-N-acetylhexosaminidase	61700000	62700000	64300000	65200000	64500000	64700000	52500000	54300000	52700000	60600000	57000000	59800000		63850000	56150000	0.879405
Q01989;Q01989-2	MYS9_DROME	jar	Myosin heavy chain 95F	69600000	62300000	64100000	64100000	63200000	59000000	62100000	63700000	60000000	62300000	60100000	60000000		6.37167e+07	6.13667e+07	0.963118
P54351	NSF2_DROME	Nsf2	Vesicle-fusing ATPase 2	63100000	59100000	64000000	66300000	66900000	62600000	62000000	68300000	69200000	65900000	70300000	63900000		6.36667e+07	66600000	1.04607
Q8T5S9	Q8T5S9_DROME	metro	GH12103p	66100000	66200000	59500000	65600000	66900000	57500000	64600000	68900000	62800000	62500000	59800000	68200000		6.36333e+07	6.44667e+07	1.0131
Q9VZM5	PIGB_DROME	PIG-B	GPI mannosyltransferase 3	58200000	54200000	71800000	68200000	64600000	64500000	65800000	66800000	70100000	70300000	70000000	69300000		6.35833e+07	6.87167e+07	1.08073
Q7KUT2	LONM_DROME	Lon	Lon protease homolog, mitochondrial	69300000	56900000	62000000	68600000	64700000	59900000	62100000	62900000	61200000	62800000	62700000	63500000		6.35667e+07	6.25333e+07	0.983744
Q9VCA0	Q9VCA0_DROME	Dmel\CG6356	FI05810p	70700000	58100000	55000000	65800000	66000000	65700000	57200000	60100000	58500000	59800000	58100000	61500000		63550000	59200000	0.93155
O96824	O96824_DROME	Lamtor5	Late endosomal/lysosomal adaptor and MAPK and MTOR activator 5	67100000	51600000	70600000	64300000	66000000	61300000	73900000	74500000	55800000	53300000	68300000	77400000		6.34833e+07	67200000	1.05855
A0A0B4K6W0;A0A6M3QH40	A0A0B4K6W0_DROME;A0A6M3QH40_DROME	CAP	CAP, isoform V	63600000	64000000	61100000	63200000	65500000	63300000	63500000	63000000	68500000	66100000	62500000	66500000		63450000	6.50167e+07	1.02469
A0A0B4K709;A0A126GV09;Q9VCG8	A0A0B4K709_DROME;A0A126GV09_DROME;Q9VCG8_DROME	CG12492;CG13818;lincRNA.840	Uncharacterized protein, isoform E	62000000	67500000	65200000	61300000	62100000	62400000	70000000	65800000	68600000	66900000	67500000	67300000		6.34167e+07	6.76833e+07	1.06728
X2JF29;Q8SY97	Q8SY97_DROME;X2JF29_DROME	CG5579;Dmel\CG33178	glutathione transferase	59600000	65900000	63500000	62500000	64300000	64700000	80100000	67800000	79900000	80100000	71500000	77400000		6.34167e+07	7.61333e+07	1.20053
M9PHV4;Q8IR21	M9PHV4_DROME;Q8IR21_DROME	CG9216;Dmel\CG42354	Uncharacterized protein, isoform F	64200000	82000000	48100000	63700000	64800000	57600000	79200000	85800000	72600000	67000000	76000000	90800000		63400000	7.85667e+07	1.23922
Q03043;Q03043-2;Q03043-3	KGP24_DROME	for	cGMP-dependent protein kinase, isozyme 2 forms cD4/T1/T3A/T3B	65400000	58500000	69400000	58700000	61500000	66800000	77000000	87400000	84700000	86600000	78700000	78600000		6.33833e+07	8.21667e+07	1.29634
Q9W4V8	TI50C_DROME	ttm50	Mitochondrial import inner membrane translocase subunit TIM50-C	50600000	69600000	67200000	67700000	64800000	60100000	59700000	65800000	67600000	57400000	64300000	61500000		6.33333e+07	6.27167e+07	0.990263
Q9VNA3	Q9VNA3_DROME	BEST:LD29996	GH21273p	68100000	59300000	64500000	63800000	67500000	56700000	59100000	69000000	60600000	62500000	64000000	65000000		6.33167e+07	6.33667e+07	1.00079
M9PEC1;M9PES8;M9PHL4;Q9VRY6	M9PEC1_DROME;M9PES8_DROME;M9PHL4_DROME;Q9VRY6_DROME	Ist1	IST1 homolog	62300000	58200000	66300000	65600000	70000000	57400000	67700000	64100000	66100000	65500000	70500000	64900000		63300000	6.64667e+07	1.05003
Q9VLY7	Q9VLY7_DROME	Tep3	GH05679p	60400000	64200000	61600000	66400000	66000000	60200000	58800000	53700000	62000000	60600000	60300000	61100000		6.31333e+07	5.94167e+07	0.94113
P48554	RAC2_DROME	Rac2	Ras-related protein Rac2	72000000	59400000	71500000	62400000	63200000	50200000	48700000	55800000	41900000	48800000	53700000	44600000		6.31167e+07	4.89167e+07	0.77502
Q7K3U4	Q7K3U4_DROME	Fmo-2	Flavin-containing monooxygenase	64600000	61600000	67800000	67700000	60300000	56500000	45500000	45300000	56600000	44400000	45900000	44200000		6.30833e+07	4.69833e+07	0.744782
Q9VVS6	Q9VVS6_DROME	Atg3	Ubiquitin-like-conjugating enzyme ATG3	64600000	61700000	62000000	63700000	62100000	64400000	70200000	68300000	67200000	70900000	66600000	69500000		6.30833e+07	6.87833e+07	1.09036
A0A0B4LF95;A1Z944	A0A0B4LF95_DROME;A1Z944_DROME	GLS	glutaminase	62700000	66500000	65000000	61300000	60000000	62600000	81300000	77400000	89800000	80200000	85800000	79900000		6.30167e+07	82400000	1.30759
A1Z933	A1Z933_DROME	CG8810	GEO02273p1	53100000	69900000	59600000	62600000	65600000	67000000	58000000	63100000	59000000	62900000	65800000	63700000		6.29667e+07	6.20833e+07	0.985971
Q7K0L4	WDR26_DROME	CG7611	WD repeat-containing protein 26 homolog	62500000	62800000	64800000	65100000	64300000	58200000	55900000	50600000	63500000	57700000	59200000	62800000		62950000	5.82833e+07	0.925867
Q8IQH6	Q8IQH6_DROME	nebu	Nebulosa, isoform A	56900000	63000000	60000000	65100000	58000000	74700000	72500000	63500000	82800000	74200000	71300000	69700000		62950000	7.23333e+07	1.14906
Q9VMW1	Q9VMW1_DROME	Rtnl1	Reticulon-like protein	29700000	117000000	87900000	26100000	54600000	62300000	119000000	91600000	102000000	103000000	95400000	109000000		6.29333e+07	1.03333e+08	1.64195
Q9VH72	Q9VH72_DROME	BVR	TA01656p1	66900000	61400000	58800000	64200000	68500000	57400000	62500000	63600000	65500000	69200000	63600000	64600000		6.28667e+07	6.48333e+07	1.03128
Q8T0N5	Q8T0N5_DROME	Dmel\CG8768	GH17516p	59600000	66100000	61500000	71500000	62600000	54500000	63800000	61600000	59200000	66300000	63800000	72300000		6.26333e+07	64500000	1.0298
Q9V3N6	Q9V3N6_DROME	TM9SF4	Transmembrane 9 superfamily member	60400000	60500000	63700000	64800000	65600000	60700000	57700000	62100000	57900000	64900000	62900000	60600000		6.26167e+07	6.10167e+07	0.974448
Q9VFP6	Q9VFP6_DROME	Ipp	Inositol polyphosphate 1-phosphatase	61300000	54300000	63200000	67200000	69500000	59700000	54900000	58100000	56700000	57900000	61800000	61600000		6.25333e+07	58500000	0.935501
Q9VE00	C12A4_DROME	Cyp12a4	Probable cytochrome P450 12a4, mitochondrial	59900000	58000000	66700000	60100000	64200000	66200000	64700000	63000000	62700000	68000000	67100000	60100000		6.25167e+07	6.42667e+07	1.02799
A0A0B4LGB7	A0A0B4LGB7_DROME	SERCA	Calcium-transporting ATPase	55300000	62400000	65200000	61700000	62400000	67500000	48100000	69900000	59900000	50700000	55000000	55800000		6.24167e+07	5.65667e+07	0.906275
A0A0C4FEI8;Q9V3D8	A0A0C4FEI8_DROME;Q9V3D8_DROME	grsm	Granny smith, isoform F	63100000	62300000	58100000	66700000	62900000	60900000	64500000	59200000	49600000	51500000	63300000	55500000		6.23333e+07	5.72667e+07	0.918717
Q9NB04	PATJ_DROME	Patj	Patj homolog	60200000	59600000	61700000	62900000	66800000	62800000	61500000	67600000	66600000	66800000	65300000	75500000		6.23333e+07	6.72167e+07	1.07834
Q9W3R8	Q9W3R8_DROME	Dmel\CG2059	sn-1-specific diacylglycerol lipase ABHD11	51100000	68000000	67200000	57800000	59700000	69600000	54700000	56600000	60000000	63800000	67600000	70900000		6.22333e+07	6.22667e+07	1.00054
Q9VSS1	ABCE1_DROME	pix	Protein Pixie	68200000	57800000	62300000	65600000	59500000	60000000	63200000	62100000	69000000	62600000	65600000	60300000		6.22333e+07	63800000	1.02517
Q9VSF3	UBC2M_DROME	UbcE2M	Nedd8-conjugating enzyme UbcE2M	68400000	56300000	65300000	65000000	58800000	59500000	50200000	51200000	52400000	51800000	50800000	52700000		6.22167e+07	5.15167e+07	0.82802
Q7KK51;Q8MLR7;Q9W1Q6	Q7KK51_DROME;Q8MLR7_DROME;Q9W1Q6_DROME	Mtmr6	Phosphatidylinositol-3-phosphate phosphatase	66900000	67500000	63200000	71800000	52500000	51000000	74000000	65600000	78500000	69100000	74400000	72600000		62150000	7.23667e+07	1.16439
Q7K1C3	Q7K1C3_DROME	Dmel\CG6984	Enoyl-CoA hydratase domain-containing protein 3, mitochondrial	67300000	56600000	61700000	61600000	64000000	61500000	55100000	58300000	57000000	56900000	61400000	57500000		6.21167e+07	57700000	0.928897
A8JNS4;M9PCD9;Q9VU81;Q9VU82;Q9VU83	A8JNS4_DROME;M9PCD9_DROME;Q9VU81_DROME;Q9VU82_DROME;Q9VU83_DROME	stv	Starvin, isoform E	56600000	57700000	62200000	60300000	68400000	67200000	60400000	61800000	61800000	64300000	59900000	66300000		6.20667e+07	6.24167e+07	1.00564
Q9W2D6	TIM10_DROME	Tim10	Mitochondrial import inner membrane translocase subunit Tim10	73900000	83600000	67200000	39500000	51700000	56100000	43100000	27600000	36800000	42400000	36900000	42600000		62000000	3.82333e+07	0.616667
A4UZ58	A4UZ58_DROME	koi	Klaroid, isoform E	69300000	58900000	64600000	62100000	59200000	57400000	66200000	68000000	65900000	72100000	65900000	68100000		6.19167e+07	67700000	1.09341
Q9V3K3	RUVB2_DROME	rept	RuvB-like helicase 2	65600000	56900000	63000000	63100000	62300000	60100000	54200000	55200000	59700000	60900000	59100000	61600000		6.18333e+07	58450000	0.945283
Q4V429	Q4V429_DROME	Dmel\CG13018	Cytochrome c oxidase assembly factor 5	80400000	51200000	69500000	67800000	55000000	46600000	53900000	47500000	37600000	43300000	44500000	54800000		61750000	4.69333e+07	0.760054
Q9VGH5	Q9VGH5_DROME	glo	AT27789p	63800000	63700000	57600000	57500000	65200000	62700000	50300000	47700000	58600000	62000000	51100000	59600000		61750000	5.48833e+07	0.888799
Q7JVZ8	Q7JVZ8_DROME	GstE11	Glutathione S transferase E11, isoform A	73400000	57700000	55400000	62200000	67300000	54400000	52300000	52200000	44300000	41700000	45300000	51600000		6.17333e+07	47900000	0.775918
Q7JXF7	SEELE_DROME	sel	Protein seele	64000000	55400000	60800000	61000000	65900000	63200000	53900000	58400000	51900000	48200000	53100000	52400000		6.17167e+07	5.29833e+07	0.858493
Q9VGK3	Q9VGK3_DROME	Dmel\CG14715	peptidylprolyl isomerase	67500000	65700000	55500000	51100000	64000000	66300000	57900000	61300000	75900000	82700000	57000000	43700000		6.16833e+07	6.30833e+07	1.0227
A1Z814	A1Z814_DROME	Dmel\CG1513	Oxysterol-binding protein	59600000	63600000	62200000	66400000	57000000	61100000	75100000	68100000	71100000	65400000	71100000	77100000		61650000	7.13167e+07	1.1568
A0A0B4LET0;Q7K4C2	A0A0B4LET0_DROME;Q7K4C2_DROME	Dmel\CG7737	Uncharacterized protein, isoform B	67400000	62000000	58500000	58100000	60100000	63700000	54300000	64800000	50100000	55200000	54900000	55300000		6.16333e+07	5.57667e+07	0.904813
Q9VTF8	Q9VTF8_DROME	mRpL2	Mitochondrial ribosomal protein L2	66700000	60100000	58800000	57300000	70200000	56700000	56600000	68600000	66700000	60400000	61100000	60800000		6.16333e+07	6.23667e+07	1.0119
Q9VF51	Q9VF51_DROME	AOX3	Aldehyde oxidase 3, isoform A	64900000	60500000	70500000	54600000	59400000	59300000	50000000	47200000	50000000	52900000	51800000	52000000		6.15333e+07	50650000	0.823131
Q9W299	Q9W299_DROME	Dmel\CG11474	Sugar phosphate phosphatase	60600000	53700000	61100000	65500000	65800000	62200000	62700000	61600000	61200000	61200000	64200000	62300000		6.14833e+07	62200000	1.01166
Q9VLP3	MSS4_DROME	strat	Guanine nucleotide exchange factor MSS4 homolog	69600000	54800000	56900000	64200000	61900000	60900000	53300000	59100000	51900000	56300000	57000000	59900000		6.13833e+07	56250000	0.916373
Q7KSC4	MPC1_DROME	Mpc1	Mitochondrial pyruvate carrier 1	61700000	62400000	63000000	61300000	59900000	59900000	60400000	62300000	57900000	58400000	66000000	52600000		6.13667e+07	59600000	0.971211
Q9VLT5	POE_DROME	poe	Protein purity of essence	63200000	59400000	61800000	63600000	58500000	61100000	60800000	60100000	63500000	61200000	60100000	59400000		6.12667e+07	60850000	0.993199
O96299	O96299_DROME	Sodh2	Sorbitol dehydrogenase	67700000	64000000	57700000	58800000	59800000	59400000	54900000	55300000	48300000	59600000	58400000	60300000		6.12333e+07	5.61333e+07	0.916712
Q9NHE5-2;Q9NHE5;Q9NHE5-4	CAPS_DROME	Cadps	Calcium-dependent secretion activator	60700000	61500000	64400000	62900000	59500000	57800000	63800000	64400000	63300000	64300000	65200000	66500000		6.11333e+07	6.45833e+07	1.05643
A8JQV3	A8JQV3_DROME	Dmel\CG17816	Nuclear protein MDM1	50800000	64300000	70400000	54000000	64500000	62600000	72200000	70900000	68300000	70400000	69300000	69900000		61100000	7.01667e+07	1.14839
Q9W0I6	SAC1_DROME	Sac1	Phosphatidylinositol-3-phosphatase SAC1	62700000	57900000	60300000	65000000	62100000	58300000	56600000	60300000	55700000	55800000	58900000	60100000		61050000	57900000	0.948403
Q9VH37	Q9VH37_DROME	Dmel\CG12811	IP06524p	66900000	61800000	54400000	57500000	68100000	57300000	41300000	49800000	46900000	45500000	44300000	41900000		61000000	44950000	0.736885
Q8MRW1	Q8MRW1_DROME	Tim23	SD19278p	70500000	56400000	59400000	59300000	60700000	59700000	53900000	60000000	52800000	50300000	51700000	50400000		61000000	5.31833e+07	0.871858
Q9VZE4	Q9VZE4_DROME	cg1316	RE70333p	59200000	58200000	56700000	64800000	64200000	60700000	49200000	61300000	55200000	57100000	52500000	54700000		6.06333e+07	55000000	0.907092
Q7KUT8	Q7KUT8_DROME	Papss	PAPS synthetase, isoform E	69000000	55100000	60500000	57500000	62000000	59300000	56300000	66800000	59200000	58000000	66200000	56500000		6.05667e+07	60500000	0.998899
P49071	MAPK2_DROME	MAPk-Ak2	MAP kinase-activated protein kinase 2	60100000	62700000	68900000	70300000	58100000	43000000	82400000	66300000	83700000	79300000	83500000	79800000		6.05167e+07	7.91667e+07	1.30818
Q9VN19	GET4_DROME	CG9853	Golgi to ER traffic protein 4 homolog	56000000	55400000	63600000	64600000	63200000	60000000	57100000	57300000	50900000	46900000	52600000	55300000		6.04667e+07	53350000	0.882304
Q9W1E9	Q9W1E9_DROME	Fmo-1	Flavin-containing monooxygenase	65300000	54600000	60700000	54500000	63500000	63500000	52800000	68900000	58400000	53400000	59200000	51000000		60350000	5.72833e+07	0.949185
Q9VCW2	Q9VCW2_DROME	cd	Cardinal	53500000	63900000	58700000	62400000	61800000	61200000	59800000	65400000	60300000	71500000	68100000	65200000		60250000	65050000	1.07967
Q9VMD3	Q9VMD3_DROME	HemK1	peptide chain release factor N(5)-glutamine methyltransferase	61700000	55300000	61600000	60700000	63300000	58800000	53300000	58500000	49600000	57100000	53200000	55400000		6.02333e+07	5.45167e+07	0.905091
Q9V9R3	Q9V9R3_DROME	Ac3	Adenylate cyclase type 3	64700000	58300000	61600000	65300000	59600000	51900000	61500000	61000000	63600000	61300000	62900000	53300000		6.02333e+07	60600000	1.00609
Q9VCR9	Q9VCR9_DROME	Dmel\CG17121	RH48101p	64300000	50400000	64200000	66600000	64000000	51800000	60500000	63100000	62300000	58500000	60600000	65900000		6.02167e+07	6.18167e+07	1.02657
Q7PLL6	Q7PLL6_DROME	l(3)80Fj	Lethal (3) 80Fj, isoform A	62500000	52400000	65700000	61900000	56300000	61800000	58000000	59100000	57700000	55000000	58800000	54900000		60100000	57250000	0.952579
Q9VFM9	TWF_DROME	twf	Twinfilin	59500000	60100000	60900000	57800000	63700000	57800000	66000000	63700000	64300000	68600000	64600000	68400000		5.99667e+07	6.59333e+07	1.0995
Q9VG69	Q9VG69_DROME	Srlp	LP03547p	58000000	73100000	56500000	50900000	53400000	67800000	75900000	58600000	83500000	73100000	66700000	57800000		59950000	6.92667e+07	1.15541
Q9VTZ4	Q9VTZ4_DROME	nst	Phosphoacetylglucosamine mutase	63200000	59900000	57600000	60300000	60600000	57800000	56300000	62600000	58300000	60600000	59300000	57500000		59900000	59100000	0.986644
Q9W2P5	Q9W2P5_DROME	Dmel\CG9344	RE43665p	60000000	57300000	65700000	63000000	58200000	55100000	54100000	53700000	50600000	57100000	54700000	53100000		5.98833e+07	5.38833e+07	0.899805
Q9W1X9	OCAD1_DROME	asrij	OCIA domain-containing protein 1	60900000	64600000	58100000	58900000	54100000	62700000	73700000	71500000	77800000	66700000	73100000	66500000		5.98833e+07	71550000	1.19482
Q9VSY0	Q9VSY0_DROME	Cpr67B	Cuticular protein 67B	47600000	54000000	50200000	67700000	75100000	64500000	56800000	49600000	68600000	74900000	67800000	71700000		59850000	64900000	1.08438
Q9V895-2;Q9V895	AN32A_DROME	Anp32a	Acidic leucine-rich nuclear phosphoprotein 32 family member A	59900000	55700000	65300000	66600000	60100000	50700000	62600000	62800000	63200000	61600000	65200000	68300000		5.97167e+07	63950000	1.07089
Q9VE73	Q9VE73_DROME	Wdr37	WD repeat-containing protein 37	52300000	63700000	58100000	58200000	63000000	62700000	62000000	59400000	57800000	66200000	61200000	65500000		5.96667e+07	6.20167e+07	1.03939
P32392	ARP3_DROME	Arp3	Actin-related protein 3	60400000	51700000	55400000	67700000	65700000	57000000	57300000	58200000	56800000	62100000	53800000	69500000		59650000	5.96167e+07	0.999441
Q9VR07	INE_DROME	ine	Sodium- and chloride-dependent GABA transporter ine	56400000	53100000	59100000	57800000	67800000	63200000	70700000	67300000	71600000	72500000	81400000	59800000		5.95667e+07	70550000	1.18439
Q9V4S8	CSN7_DROME	CSN7	COP9 signalosome complex subunit 7	65700000	60200000	60500000	60200000	52700000	57600000	66500000	57100000	71700000	69400000	69200000	69200000		5.94833e+07	6.71833e+07	1.12945
Q9VLQ9	Q9VLQ9_DROME	Snx6	Sorting nexin	59900000	57700000	58500000	67500000	61100000	51700000	58900000	54700000	58700000	65400000	60400000	60300000		59400000	5.97333e+07	1.00561
Q95SK3	CK5P3_DROME	CG30291	CDK5RAP3 protein homolog	63700000	52900000	57200000	63600000	63200000	55600000	52300000	59600000	50400000	51800000	57500000	51600000		5.93667e+07	5.38667e+07	0.907355
Q7JWR9	ZC3HF_DROME	CG8635	Zinc finger CCCH domain-containing protein 15 homolog	51700000	59100000	63300000	56500000	63000000	62500000	57800000	61000000	58500000	56000000	57400000	55000000		59350000	5.76167e+07	0.970795
Q9V3F8	Q9V3F8_DROME	P5cr	Pyrroline-5-carboxylate reductase	57300000	68200000	58800000	53900000	49700000	68200000	57300000	58700000	63800000	60300000	55600000	55600000		59350000	58550000	0.986521
Q9VIH3	MTP_DROME	Mtp	Microsomal triacylglycerol transfer protein	59000000	59000000	65600000	51600000	54100000	66200000	51000000	54500000	51300000	59900000	59000000	54100000		59250000	5.49667e+07	0.927707
A0A0B4JD23;Q8IMI0;Q961V3;A0A0B4JDE3;Q7KRU0;Q9VA53	A0A0B4JD23_DROME;A0A0B4JDE3_DROME;Q7KRU0_DROME;Q8IMI0_DROME;Q961V3_DROME;Q9VA53_DROME	Dmel\CG2246	Uncharacterized protein, isoform J	62200000	52100000	59300000	57200000	61900000	62500000	58100000	64700000	59500000	60100000	60800000	60100000		59200000	60550000	1.0228
Q9VUR3	AIMP2_DROME	AIMP2	Probable aminoacyl tRNA synthase complex-interacting multifunctional protein 2	55400000	65000000	61500000	55100000	56500000	61400000	54100000	60200000	57300000	55400000	55400000	53900000		59150000	56050000	0.947591
Q9VF89	RM09_DROME	mRpL9	Large ribosomal subunit protein bL9m	58600000	64700000	53600000	60800000	57600000	59500000	54500000	57300000	58500000	56100000	53000000	54200000		5.91333e+07	55600000	0.940248
Q7PLT4	Q7PLT4_DROME	Tim17b	Translocase of the inner mitochondrial membrane 17b, isoform A	61400000	60100000	60100000	64200000	54200000	54500000	49100000	50700000	44700000	51700000	51500000	48300000		5.90833e+07	4.93333e+07	0.834979
A0A140SRF8;Q9VBU6	A0A140SRF8_DROME;Q9VBU6_DROME	Dmel\CG11857	Uncharacterized protein, isoform C	56000000	61800000	58600000	61200000	59000000	57400000	66300000	68300000	64800000	66500000	66600000	61000000		59000000	6.55833e+07	1.11158
Q24368	ISWI_DROME	Iswi	Chromatin-remodeling complex ATPase chain Iswi	54600000	58500000	60200000	59600000	61500000	59100000	63500000	65100000	67400000	64600000	65400000	61100000		5.89167e+07	6.45167e+07	1.09505
Q9VGT3	Q9VGT3_DROME	Ugt302C1	GM04645p	51600000	61100000	60000000	52300000	64000000	64100000	69500000	63100000	67200000	67300000	68600000	64400000		58850000	6.66833e+07	1.13311
Q9U3Z7	NH2L1_DROME	hoip	NHP2-like protein 1 homolog	61800000	52800000	65400000	58000000	54600000	60100000	59700000	50400000	54000000	59300000	54800000	52400000		5.87833e+07	55100000	0.937341
Q9VK25	Q9VK25_DROME	Pect	ethanolamine-phosphate cytidylyltransferase	63600000	52900000	60800000	60600000	57800000	56200000	58900000	62900000	62300000	57700000	60500000	57600000		58650000	5.99833e+07	1.02273
Q9VIM5	ARPC2_DROME	Arpc2	Actin-related protein 2/3 complex subunit 2	53500000	55600000	59300000	58300000	63100000	61900000	71200000	56800000	76500000	74700000	70800000	64100000		5.86167e+07	6.90167e+07	1.17742
Q7KUM2	Q7KUM2_DROME	CG7489	TIL domain-containing protein	49600000	55800000	57100000	60800000	62800000	64400000	53500000	42100000						5.84167e+07	47800000	0.81826
Q9VXR9	Q9VXR9_DROME	Dmel\CG8128	FI03680p	51500000	57800000	62900000	55000000	58600000	63800000	71300000	70600000	78100000	68400000	69300000	67400000		5.82667e+07	70850000	1.21596
Q9W0L6	Q9W0L6_DROME	Dmel\CG13907	GH22266p	57000000	60700000	66200000	56300000	57200000	51900000	53900000	52400000	57800000	63300000	57700000	54500000		5.82167e+07	56600000	0.97223
P00399	COX1_DROME	mt:CoI	Cytochrome c oxidase subunit 1	34800000	90300000	60800000	64000000	55200000	44200000	90500000	71500000	64900000	74300000	73200000	80500000		5.82167e+07	7.58167e+07	1.30232
Q9VTB0	Q9VTB0_DROME	Dmel\CG8003	LD35289p	59500000	53400000	54500000	58500000	60400000	61200000	59400000	61400000	54200000	49900000	56000000	57300000		5.79167e+07	5.63667e+07	0.973237
Q7K486	ARMC6_DROME	CG5721	Armadillo repeat-containing protein 6 homolog	61900000	53100000	59000000	58900000	57100000	57300000	59700000	55900000	60300000	56700000	56300000	58700000		5.78833e+07	5.79333e+07	1.00086
Q9VIV6	Q9VIV6_DROME	Dmel\CG10194	GH04973p	57100000	61300000	57800000	61100000	54800000	54500000	59800000	60600000	53600000	54500000	55900000	57900000		5.77667e+07	57050000	0.987594
B7YZT2;B7YZT2-2	FIS1_DROME	Fis1	Mitochondrial fission 1 protein	59300000	53500000	55800000	61200000	61500000	54300000	50700000	49700000	56300000	56100000	54200000	50500000		57600000	5.29167e+07	0.918692
Q9VXQ0	Q9VXQ0_DROME	mRpL3	Large ribosomal subunit protein uL3m	64000000	55100000	51300000	57200000	59700000	58200000	58800000	56000000	59200000	60400000	57900000	50100000		5.75833e+07	5.70667e+07	0.991027
Q0E8C8	SP77B_DROME	Spn77Ba	Serine protease inhibitor 77Ba	56100000	62100000	55700000	55500000	61200000	54800000	55600000	58300000	58600000	56100000	52900000	58500000		5.75667e+07	5.66667e+07	0.984366
A8JNK1;M9PHB1	A8JNK1_DROME;M9PHB1_DROME	ens	Ensconsin, isoform F	51400000	58600000	61600000	52700000	65700000	55400000	71700000	72300000	69100000	70500000	70100000	75200000		5.75667e+07	7.14833e+07	1.24175
Q9VJ31	Q9VJ31_DROME	Bhmt	CG10623 protein	50600000	59300000	58500000	58500000	59800000	58500000	63200000	66700000	65700000	64300000	63300000	68500000		5.75333e+07	6.52833e+07	1.1347
Q24478	CP190_DROME	Cp190	Centrosome-associated zinc finger protein Cp190	49300000	59600000	64000000	55000000	55400000	61700000	74400000	59900000	76700000	68100000	74400000	65300000		57500000	69800000	1.21391
Q8IPB1;Q9V3I1	Q8IPB1_DROME;Q9V3I1_DROME	dUTPase	Deoxyuridine 5'-triphosphate nucleotidohydrolase	66400000	46200000	66200000	53200000	54900000	58000000	48000000	56000000	55600000	45800000	56000000	52000000		5.74833e+07	5.22333e+07	0.908669
Q9VJ28	Q9VJ28_DROME	L2HGDH	L-2-hydroxyglutarate dehydrogenase, mitochondrial	62000000	53300000	64700000	56400000	54100000	54400000	50600000	60000000	54200000	59600000	57100000	51700000		5.74833e+07	5.55333e+07	0.966077
M9PGI6;O77434	M9PGI6_DROME;O77434_DROME	Sec22	Secretory 22, isoform B	53900000	59500000	56300000	57800000	57800000	59200000	71200000	56600000	71000000	75800000	65800000	61000000		5.74167e+07	66900000	1.16517
Q7JYX0	GSTEE_DROME	GstE14	Glutathione S-transferase E14	65100000	58900000	55500000	61300000	52400000	51100000	43300000	35900000	61200000	64500000	48700000	41500000		5.73833e+07	4.91833e+07	0.857101
Q7K1W5	Q7K1W5_DROME	Dmel\CG8187	LD35843p	64500000	58900000	53100000	58500000	54900000	54300000	53400000	55300000	51700000	53300000	49500000	56600000		5.73667e+07	53300000	0.929111
Q9VF87	CYFIP_DROME	Cyfip	Cytoplasmic FMR1-interacting protein	58400000	59900000	55700000	59400000	57200000	53500000	68900000	65300000	63400000	59900000	65700000	67400000		57350000	65100000	1.13514
Q9W3I9	Q9W3I9_DROME	Traf6	GH01161p	46000000	73600000	57000000	51000000	53300000	63100000			46700000			49100000		5.73333e+07	47900000	0.835465
P39736	BX42_DROME	Bx42	Puff-specific protein Bx42	64100000	51500000	58100000	61800000	55400000	53000000	51300000	48600000	57100000	45600000	42500000	57900000		5.73167e+07	50500000	0.88107
Q8SX37	CDIPT_DROME	Pis	CDP-diacylglycerol--inositol 3-phosphatidyltransferase	53600000	60300000	61100000	61000000	52900000	55000000	70900000	66800000	63700000	67900000	68700000	75900000		5.73167e+07	6.89833e+07	1.20355
Q9VYQ8	UBP7_DROME	Usp7	Ubiquitin carboxyl-terminal hydrolase 7	59100000	55100000	56700000	56000000	59500000	57200000	54400000	58400000	57100000	56900000	56100000	56100000		5.72667e+07	56500000	0.986612
O01404	PHM_DROME	Phm	Peptidylglycine alpha-hydroxylating monooxygenase	62300000	52400000	54100000	60300000	59700000	54500000	52500000	52700000	53700000	56300000	56600000	60400000		5.72167e+07	5.53667e+07	0.967667
A0A0B4LID7;Q9VDS7	A0A0B4LID7_DROME;Q9VDS7_DROME	ClpX	Uncharacterized protein, isoform C	62900000	54300000	52500000	55500000	60700000	56100000	53800000	55300000	62400000	63900000	59500000	59300000		57000000	5.90333e+07	1.03567
P40423	SQH_DROME	sqh	Myosin regulatory light chain sqh	60000000	53300000	54900000	61700000	61200000	50400000	59100000	52100000	53400000	57300000	51500000	55700000		5.69167e+07	54850000	0.96369
Q9VVJ7	Q9VVJ7_DROME	2025-09-15	Selenoprotein F	70200000	50000000	59200000	60000000	56300000	45100000	40500000	39600000	41300000	45400000	46000000	45900000		56800000	4.31167e+07	0.759096
Q9W423	Q9W423_DROME	schlank	LD18904p	51300000	61400000	53800000	63500000	58300000	52500000	55600000	67200000	61400000	62200000	65300000	62900000		56800000	6.24333e+07	1.09918
M9NF14	M9NF14_DROME	Imp	IGF-II mRNA-binding protein, isoform L	51900000	55400000	55100000	52100000	65100000	60500000	60900000	61800000	66900000	60500000	62800000	61500000		5.66833e+07	62400000	1.10085
Q9W4A6	Q9W4A6_DROME	OtopLa	Otopetrin-like a, isoform A	61800000	49900000	59100000	70500000	53900000	44300000	49400000	63800000	60100000	41800000	33100000	62100000		5.65833e+07	5.17167e+07	0.913991
Q9VHB1;A0A0B4KFZ7	A0A0B4KFZ7_DROME;Q9VHB1_DROME	Dmel\CG9399	Mitochondrial pyruvate carrier	58200000	51900000	81500000	76000000	32900000	38600000	49400000	52200000	30900000	37800000	37900000	34000000		5.65167e+07	4.03667e+07	0.714244
Q9VMM6	OBSTE_DROME	obst-E	Protein obstructor-E	67200000	45600000	56500000	61900000	59400000	48300000	38200000	31700000	29100000	35900000	40800000	41600000		5.64833e+07	3.62167e+07	0.641192
Q9VA54	Q9VA54_DROME	Rpt6R	26S proteasome regulatory subunit 8	51800000	50000000	51500000	57800000	62400000	65200000	60100000	69500000	60000000	67200000	66100000	68900000		56450000	65300000	1.15678
M9MS14	M9MS14_DROME	moody	Moody, isoform C	60100000	56100000	60800000	51500000	52800000	57400000	68200000	63500000	71500000	61800000	67200000	60800000		56450000	65500000	1.16032
Q95RS6	Q95RS6_DROME	Sph242	IP12536p	76000000	54200000	51100000	56900000	54100000	46000000	33700000	36300000	34900000	34200000	27500000	32100000		5.63833e+07	3.31167e+07	0.587349
Q9VHC8	Q9VHC8_DROME	Dmel\CG8149	LD31448p	59200000	56800000	55900000	59600000	52700000	54100000	58200000	58700000	67400000	58500000	60500000	60600000		5.63833e+07	60650000	1.07567
A0A0B4JD13	A0A0B4JD13_DROME	snu	Snustorr, isoform D	61000000	55100000	56200000	56100000	57000000	52800000	52800000	56900000	54700000	50100000	56700000	59600000		5.63667e+07	5.51333e+07	0.978119
Q9VB22	Q9VB22_DROME	pins	LD33695p	54100000	51700000	51200000	61200000	57600000	62000000	61600000	57200000	66200000	66400000	64100000	63400000		56300000	63150000	1.12167
Q9I7U4-3	TITIN_DROME	sls	Isoform B of Titin	59400000	52400000	54500000	52100000	58600000	60600000	52400000	56800000	64800000	53800000	53300000	55400000		5.62667e+07	5.60833e+07	0.996742
O77477	O77477_DROME	LD24471	LD24471p	58500000	54900000	53000000	55300000	54900000	61000000	57000000	56800000	57600000	59300000	56700000	56100000		5.62667e+07	57250000	1.01748
Q9VUW2	Q9VUW2_DROME	IMP	Inositol-1-monophosphatase	49300000	55000000	61600000	53900000	66000000	51300000	68300000	69300000	67800000	69600000	68100000	73400000		5.61833e+07	6.94167e+07	1.23554
Q9VEN6	Q9VEN6_DROME	mRpS11	Mitochondrial ribosomal protein S11	51100000	59100000	57400000	51500000	51500000	66300000	52000000	52200000	58600000	55800000	55700000	53900000		56150000	54700000	0.974176
Q9VV31	Q9VV31_DROME	Dmel\CG13059	Uncharacterized protein	60000000	38400000	57800000	52400000	65000000	62900000	43900000	40300000	39900000	48700000	52300000	52000000		5.60833e+07	4.61833e+07	0.823477
Q9VYT0	Q9VYT0_DROME	Dmel\CG15739	RE04130p	43100000	67000000	59100000	46500000	57100000	63400000	49400000	48000000	47400000	49700000	56400000	60900000		5.60333e+07	5.19667e+07	0.927424
Q7K012	Q7K012_DROME	Bap55	Brahma associated protein 55kD	59400000	55800000	54600000	54200000	56800000	55400000	56200000	59300000	61400000	57500000	52900000	59600000		5.60333e+07	5.78167e+07	1.03183
Q9VHB8	Q9VHB8_DROME	BckdhA	2-oxoisovalerate dehydrogenase subunit alpha	38800000	55000000	62500000	50100000	63500000	66300000	64700000	65100000	66500000	64200000	61500000	52300000		5.60333e+07	6.23833e+07	1.11333
Q9W4A0	Q9W4A0_DROME	Rab18	GH11193p	53800000	55600000	61200000	52500000	57300000	55400000	73700000	74500000	78600000	75700000	77600000	76800000		5.59667e+07	76150000	1.36063
Q9VKC1	Q9VKC1_DROME	RpL7-like	IP16805p	54300000	49400000	58400000	56000000	60900000	55800000	46500000	55800000	51400000	52300000	48700000	49600000		55800000	5.07167e+07	0.908901
Q9W1V8	Q9W1V8_DROME	DCTN3-p24	CG9893 protein	59100000	55200000	55100000	52600000	57500000	54600000	53300000	50300000	56400000	51100000	49100000	51700000		5.56833e+07	5.19833e+07	0.933553
Q9VRW2;M9PEB5	M9PEB5_DROME;Q9VRW2_DROME	AMT;Dmel\CG10226	Uncharacterized protein, isoform B	56000000	52300000	56900000	60100000	56000000	52700000	54900000	52000000	52400000	54100000	54500000	54200000		5.56667e+07	5.36833e+07	0.964371
Q9VV21	Q9VV21_DROME	Dmel\CG4962	GEO07736p1	72700000	23700000	58900000	58200000	59800000	60000000	76300000	38300000	66800000	77400000	83800000	62900000		55550000	6.75833e+07	1.21662
Q9VS54	Q9VS54_DROME	qm	Quemao, isoform A	53600000	55000000	56100000	54400000	57800000	56200000	63700000	61800000	60900000	60100000	57300000	66600000		5.55167e+07	6.17333e+07	1.11198
A0A0B4LHE0	A0A0B4LHE0_DROME	kcc	Kazachoc, isoform F	60100000	51400000	58000000	59300000	46700000	56100000	56600000	60500000	60400000	52500000	54900000	56500000		5.52667e+07	56900000	1.02955
Q9VMR6	Q9VMR6_DROME	Acsf2	Medium-chain acyl-CoA ligase ACSF2, mitochondrial	63200000	58600000	57600000	52200000	47800000	51500000	49200000	53700000	53300000	50900000	53000000	61600000		55150000	5.36167e+07	0.972197
Q9I7K0	JUPIT_DROME	Jupiter	Microtubule-associated protein Jupiter	54100000	47000000	59500000	58100000	59500000	52400000	52400000	60200000	57800000	55400000	52500000	54500000		55100000	5.54667e+07	1.00665
Q9VAL5	Q9VAL5_DROME	Ptp99A	protein-tyrosine-phosphatase	58800000	53300000	50500000	55700000	56900000	55300000	57700000	54500000	59900000	59700000	54700000	57100000		5.50833e+07	5.72667e+07	1.03964
Q9VW57	Q9VW57_DROME	Grasp65	Grasp65	52100000	54700000	67800000	54900000	50200000	50400000	53200000	52900000	55700000	58000000	55900000	57100000		5.50167e+07	5.54667e+07	1.00818
Q9VQ39	Q9VQ39_DROME	Dmel\CG31937	IP05441p	48200000	53300000	55600000	55200000	57500000	60300000	60500000	64200000	57500000	64100000	61400000	65600000		5.50167e+07	6.22167e+07	1.13087
Q9V4C4	Q9V4C4_DROME	Syt7	Synaptotagmin 7, isoform A	50100000	47300000	68400000	57300000	56200000	50100000	80800000	72300000	81600000	78100000	78400000	79200000		54900000	78400000	1.42805
Q24214	CANB2_DROME	CanB2	Calcineurin subunit B type 2	53400000	50800000	50400000	55500000	68500000	50700000	54100000	61000000	60200000	54700000	63800000	66600000		5.48833e+07	6.00667e+07	1.09444
Q9VIX2	Q9VIX2_DROME	Pax	Transforming growth factor beta-1-induced transcript 1 protein	55200000	59000000	55800000	48900000	54400000	55900000	49800000	46700000	54700000	50300000	52000000	44000000		5.48667e+07	4.95833e+07	0.903706
Q9V9S7;Q9V9S7-2	SYDE_DROME	RhoGAP100F	Rho GTPase-activating protein 100F	56300000	53100000	56800000	58400000	53900000	49800000	58900000	58600000	61000000	57600000	57800000	59700000		5.47167e+07	5.89333e+07	1.07706
Q9VXY3	Q9VXY3_DROME	Dbct	Dihydrolipoamide acetyltransferase component of pyruvate dehydrogenase complex	57900000	52700000	56100000	53800000	49900000	57700000	50500000	51600000	52500000	49700000	50400000	48300000		5.46833e+07	50500000	0.923499
Q9VMQ7	ELP4_DROME	Elp4	Elongator complex protein 4	52900000	61600000	55700000	50900000	51900000	55000000	55600000	57200000	56800000	58400000	49800000	59700000		5.46667e+07	56250000	1.02896
Q7K3M5	DHX15_DROME	Dhx15	ATP-dependent RNA helicase DHX15 homolog	50000000	51800000	54800000	57500000	52800000	60900000	53300000	51700000	61200000	54300000	54500000	57500000		5.46333e+07	5.54167e+07	1.01434
B7Z0W9;B7Z0W9-3	OTOP_DROME	OtopLc	Proton channel OtopLc	49600000	64900000	57500000	50600000	54000000	51000000	65600000	60800000	66300000	51200000	55000000	60800000		54600000	59950000	1.09799
A8DY49	A8DY49_DROME	Dmel\CG34215	GEO11311p1	51400000	53400000	56000000	51300000	77600000	37600000	16800000	20900000	17200000	20400000	17500000	20900000		54550000	18950000	0.347388
O97059	O97059_DROME	Ccp84Ab	Ccp84Ab	23500000	29500000	75100000	81900000	60500000	55700000	44700000	68900000	18000000	16700000	29800000	44800000		5.43667e+07	37150000	0.683323
Q8IP97	Q8IP97_DROME	Pex19	Peroxin-19	48100000	56000000	54000000	52700000	53600000	61500000	60400000	63000000	68300000	66000000	63900000	59100000		5.43167e+07	63450000	1.16815
Q9W266	WDP_DROME	wdp	Protein windpipe	54900000	53300000	53900000	54600000	51700000	57100000	51200000	50500000	54700000	55400000	54500000	53600000		54250000	5.33167e+07	0.982796
A0A0B4K7H0;Q7KN74	A0A0B4K7H0_DROME;Q7KN74_DROME	Ttc7	Tetratricopeptide repeat domain 7, isoform B	55500000	53500000	55600000	58200000	47900000	54700000	61900000	57300000	59800000	56100000	62900000	61400000		5.42333e+07	59900000	1.10449
Q9VVE2-2;Q9VVE2	ROGDI_DROME	rogdi	Protein rogdi	54100000	47500000	55600000	59700000	54300000	53400000	48100000	47200000	53200000	50200000	50200000	45900000		54100000	4.91333e+07	0.908195
P48603	CAPZB_DROME	cpb	F-actin-capping protein subunit beta	50300000	56100000	62300000	48700000	54600000	52500000	67200000	58600000	63700000	63900000	63800000	64100000		5.40833e+07	63550000	1.17504
Q9VPH7	ERF1_DROME	eRF1	Eukaryotic peptide chain release factor subunit 1	48300000	53800000	57600000	51800000	48600000	64200000	50000000	49800000	54300000	53600000	50900000	50100000		54050000	51450000	0.951896
Q9W095	Q9W095_DROME	Gk2	glycerol kinase	49600000	53700000	57800000	50200000	51600000	61200000	49000000	47500000	51800000	50100000	55400000	49300000		5.40167e+07	5.05167e+07	0.935205
Q9VMX4	Q9VMX4_DROME	Scox	AT19154p	55700000	58700000	50300000	52400000	52400000	54300000	61300000	57900000	60800000	58100000	62600000	58300000		5.39667e+07	5.98333e+07	1.10871
Q7K2E1	Q7K2E1_DROME	Dmel\CG8839	LD05247p	55900000	50000000	54600000	58400000	53200000	50600000	57900000	61200000	56600000	55300000	56000000	54300000		5.37833e+07	5.68833e+07	1.05764
Q7KVQ0	GAR1_DROME	CG4038	Probable H/ACA ribonucleoprotein complex subunit 1	55000000	46100000	57900000	54000000	54700000	54500000	52600000	55100000	48900000	41200000	45000000	45700000		53700000	4.80833e+07	0.895407
A1Z8D0	PWP1_DROME	nclb	Periodic tryptophan protein 1 homolog	47900000	47700000	59000000	50600000	55200000	61300000	51300000	55100000	53800000	47400000	49900000	50700000		5.36167e+07	5.13667e+07	0.958035
Q9VEC8	Q9VEC8_DROME	CG32920	RE23139p1	47200000	57800000	50800000	55500000	54700000	55600000	55100000	57300000	60800000	59300000	60400000	56300000		53600000	58200000	1.08582
Q9V3J4	SEC13_DROME	Sec13	Protein SEC13 homolog	52100000	57700000	54400000	50700000	55000000	51300000	63300000	62300000	61600000	61700000	59500000	63500000		5.35333e+07	6.19833e+07	1.15785
Q8SYG2	CSN3_DROME	CSN3	COP9 signalosome complex subunit 3	55000000	50000000	53600000	51400000	53900000	57000000	48500000	51100000	52500000	50800000	53800000	51400000		5.34833e+07	51350000	0.960112
Q7JWX3	Q7JWX3_DROME	nec	GH10112p	58200000	57600000	47600000	47600000	56800000	52900000	52000000	49100000	48800000	45100000	47400000	48500000		53450000	4.84833e+07	0.907078
Q7JV41	Q7JV41_DROME	ste24c	CAAX prenyl protease	50400000		49800000	55400000	57600000				56500000		52000000	56800000		53300000	55100000	1.03377
A1Z9W2	A1Z9W2_DROME	CG10220	RH47216p	58500000	58800000	49400000	57000000	45700000	50300000	48100000	50600000	44000000	43300000	50200000	46900000		5.32833e+07	4.71833e+07	0.885518
Q9VAL0	SPCS1_DROME	Spase12	Signal peptidase complex subunit 1	48900000	53200000	49300000	56800000	49300000	61800000	49400000	47500000	30600000	34500000	38900000	46800000		5.32167e+07	4.12833e+07	0.775759
Q9VHD2;Q9VHD2-2;Q9VHD2-3	MAAI2_DROME	GstZ2	Probable maleylacetoacetate isomerase 2	60400000	53500000	58200000	51000000	43300000	52800000	64700000	52400000	62400000	62800000	54900000	58200000		53200000	5.92333e+07	1.11341
Q27869	PIMT_DROME	Pcmt	Protein-L-isoaspartate(D-aspartate) O-methyltransferase	51700000	52600000	52600000	54100000	57100000	50400000	48700000	57100000	48500000	54400000	50800000	59700000		5.30833e+07	53200000	1.0022
A0A0B4KGI7	A0A0B4KGI7_DROME	Stat92E	Signal transducer and activator of transcription	50800000	53400000	60500000	50300000	51400000	52000000	52200000	57500000	48400000	51100000	52500000	41900000		5.30667e+07	50600000	0.953518
A0A0B4KFF9;Q9W205	A0A0B4KFF9_DROME;Q9W205_DROME	jbug	Jitterbug, isoform N	52100000	53200000	49600000	53500000	53300000	56500000	50700000	51400000	52200000	53100000	52000000	54100000		5.30333e+07	52250000	0.985229
Q7K172	Q7K172_DROME	ste24a	CAAX prenyl protease	51400000	57900000	58700000	55000000	44900000	49400000	62500000	63600000	51700000	54200000	61400000	49400000		5.28833e+07	5.71333e+07	1.08037
Q9Y105	SYQ_DROME	GlnRS	Probable glutamine--tRNA ligase	53000000	47800000	49200000	52600000	60100000	53900000	51500000	59000000	50900000	52200000	50100000	51600000		5.27667e+07	52550000	0.995894
P40945	ARF4_DROME	Arf4	ADP ribosylation factor 4	47600000	60200000	59800000	53300000	52100000	43400000	59900000	61300000	51400000	54400000	55000000	54400000		5.27333e+07	5.60667e+07	1.06321
Q9VJ80	Q9VJ80_DROME	Dmel\CG10211	LD42267p	46700000	52900000	55800000	51100000	56400000	53300000	50900000	51200000	56500000	59300000	56500000	52700000		52700000	5.45167e+07	1.03447
Q9W086	Q9W086_DROME	mRpL46	Large ribosomal subunit protein mL46	54000000	52700000	50000000	51800000	54900000	52600000	44100000	46300000	39500000	41300000	41100000	43600000		5.26667e+07	42650000	0.80981
Q7KY04	Q7KY04_DROME	Rab4	Rab4 protein	43100000	51700000	58600000	56100000	50200000	55800000	58700000	57300000	59800000	58300000	53700000	60600000		5.25833e+07	5.80667e+07	1.10428
Q9NFU0-2	FMR1_DROME	Fmr1	Isoform C of Fragile X messenger ribonucleoprotein 1 homolog	48800000	46800000	46600000	63900000	58100000	51000000	46900000	49100000	44800000	51500000	48200000	56400000		5.25333e+07	4.94833e+07	0.941942
Q7PLE6	Q7PLE6_DROME	BckdhB	3-methyl-2-oxobutanoate dehydrogenase (2-methylpropanoyl-transferring)	54000000	49000000	58200000	51600000	52300000	49500000	43500000	50100000	49400000	46200000	47700000	40300000		5.24333e+07	46200000	0.881119
Q7KTU2	Q7KTU2_DROME	SPoCk	Calcium-transporting ATPase	52800000	59400000	51000000	40900000	49500000	60900000	72800000	62800000	81300000	60500000	75200000	66700000		5.24167e+07	6.98833e+07	1.33323
Q9VCF4	Q9VCF4_DROME	AP-1sigma	AP complex subunit sigma	51500000	47900000	51800000	52600000	54700000	55700000	38300000	44600000	55400000	48300000	50500000	46000000		5.23667e+07	4.71833e+07	0.901018
L0MLR4	L0MLR4_DROME	CaMKII	calcium/calmodulin-dependent protein kinase	46300000	58700000	53300000	39900000	46300000	69600000	73600000	48900000	85300000	79000000	71900000	61600000		52350000	70050000	1.33811
Q9W391	KPBA_DROME	CG7766	Probable phosphorylase b kinase regulatory subunit alpha	53600000	57200000	59500000	50500000	44800000	48200000	55300000	53800000	45700000	47200000	51400000	48500000		52300000	5.03167e+07	0.962078
Q9VSI1	Q9VSI1_DROME	Dmel\CG7182	LD21269p	56900000	45700000	52800000	42800000	52800000	62700000	62900000	62500000	54900000	67900000	72700000	64100000		5.22833e+07	6.41667e+07	1.22729
Q9W452	Q9W452_DROME	Dmel\CG6067	Peptidase S1 domain-containing protein	49900000	48500000	71300000	43300000	53600000	47000000	69400000	67300000	61100000	84300000	69800000	65100000		5.22667e+07	69500000	1.32972
Q9VEJ3	Q9VEJ3_DROME	P5cr-2	Pyrroline-5-carboxylate reductase	61700000	44900000	59400000	43700000	50500000	53300000	80000000	92900000	74100000	87200000	71800000	75700000		52250000	8.02833e+07	1.53652
M9NFR5;Q95RE4	M9NFR5_DROME;Q95RE4_DROME	yps	Ypsilon schachtel, isoform B	49000000	61600000	51900000	48700000	48500000	53200000	64500000	54400000	66100000	64400000	65200000	57000000		52150000	6.19333e+07	1.1876
Q9VSL5	Q9VSL5_DROME	GstO2	Glutathione S transferase O2, isoform A	50300000	54900000	54100000	50800000	47800000	54800000	49300000	53200000	52300000	49900000	51900000	51400000		5.21167e+07	5.13333e+07	0.98497
Q8IM93	Q8IM93_DROME	Dmel\CG32017	FI18814p1	48400000	58700000	53300000	46100000	50400000	55700000	69600000	60100000	61300000	64900000	62100000	66900000		52100000	64150000	1.23129
Q9VEA1	Q9VEA1_DROME	eIF1A	Eukaryotic translation initiation factor 4C	51800000	58800000	54500000	58100000	41200000	48100000	66500000	50400000	55500000	61000000	57800000	61300000		5.20833e+07	58750000	1.128
Q9VEK7	Q9VEK7_DROME	CREG	Cellular repressor of E1A-stimulated genes, isoform A	43300000	52100000	54900000	44200000	58500000	59300000	42000000	46700000	41700000	43400000	47100000	41000000		52050000	43650000	0.838617
A8DYL2	A8DYL2_DROME	CG13498	Uncharacterized protein, isoform G	48500000	58100000	54400000	51700000	50300000	48800000	57200000	51100000	61700000	55400000	58500000	62700000		5.19667e+07	5.77667e+07	1.11161
Q9W4U2	Q9W4U2_DROME	BcDNA:RH09070	RH09070p	57200000	47600000	51100000	55200000	49500000	51000000	46300000	50800000	45700000	47200000	49400000	46200000		5.19333e+07	47600000	0.91656
Q9W199	Q9W199_DROME	mRpS17	GEO07594p1	50000000	46400000	53300000	50100000	56400000	55300000	43300000	38400000	37500000	41800000	38500000	41900000		5.19167e+07	4.02333e+07	0.77496
Q9V4I1	CP9B2_DROME	Cyp9b2	Cytochrome P450 9b2	53900000	51400000	58100000	52500000	44600000	50500000	46700000	40000000	40600000	43800000	43400000	41200000		5.18333e+07	4.26167e+07	0.822186
Q9VI53	Q9VI53_DROME	Dmel\CG1105	LD44267p	46900000	55900000	49000000	47600000	51100000	60300000	60400000	49100000	57900000	60700000	62700000	57000000		51800000	5.79667e+07	1.11905
Q8IQ80;Q8IQ82	Q8IQ80_DROME;Q8IQ82_DROME	pst	GH06117p	46500000	51200000	55000000	47500000	43100000	66900000	65600000	52600000	61200000	66500000	61300000	51300000		51700000	59750000	1.15571
Q7K0W4	Q7K0W4_DROME	Vajk4	LD27203p	114000000	20300000	43900000	54500000	39900000	37400000	59300000	23500000	50800000	42000000	40200000	38200000		5.16667e+07	4.23333e+07	0.819355
Q9VMY1	RM24_DROME	mRpL24	Large ribosomal subunit protein uL24m	44800000	56700000	50600000	46000000	55000000	56100000	48500000	49900000	48000000	46600000	45000000	48000000		5.15333e+07	4.76667e+07	0.924968
Q7JMV3	Q7JMV3_DROME	CaMKI	Calcium/calmodulin dependent protein kinase I	56200000	53600000	48300000	43200000	48400000	59500000	63600000	63700000	69700000	66400000	66800000	61800000		5.15333e+07	6.53333e+07	1.26779
Q0KI15	Q0KI15_DROME	Dmel\CG34150	Complex III assembly factor LYRM7	46700000	50900000	57400000	50000000	47800000	56100000	55500000	50200000	58300000	53500000	52500000	54900000		5.14833e+07	54150000	1.0518
Q7K3W2	Q7K3W2_DROME	Dmel\CG8728	Mitochondrial-processing peptidase subunit alpha	48400000	49000000	52000000	47900000	54700000	56400000	53100000	55600000	53400000	55400000	54900000	53600000		51400000	5.43333e+07	1.05707
Q9V3T2	Q9V3T2_DROME	Dmel\CG5254	Mitochondrial 2-oxodicarboxylate carrier	51900000	50500000	53800000	50700000	47200000	54100000	47100000	61100000	47700000	45200000	50000000	53100000		5.13667e+07	50700000	0.987021
Q9V6X7	OFUT1_DROME	O-fut1	GDP-fucose protein O-fucosyltransferase 1	50200000	51200000	53900000	50400000	51700000	50600000	50300000	51400000	50900000	53300000	45200000	51200000		5.13333e+07	5.03833e+07	0.981494
Q9VX69	Q9VX69_DROME	Dmel\CG5162	FI01450p	59500000	61800000	51900000	45400000	50800000	38500000	48900000	47700000	44800000	43500000	47000000	43800000		5.13167e+07	45950000	0.895421
Q9Y114	Q9Y114_DROME	anon-WO0172774.24	UBX domain-containing protein 4	54000000	48500000	52800000	51800000	51200000	49300000	56300000	56100000	56000000	52000000	54400000	56200000		5.12667e+07	5.51667e+07	1.07607
B7YZV4	PDE1_DROME	Pde1c	Dual specificity calcium/calmodulin-dependent 3',5'-cyclic nucleotide phosphodiesterase 1	53400000	57700000	55400000	52500000	40200000	48400000	61300000	47900000	57400000	58000000	55300000	54500000		5.12667e+07	5.57333e+07	1.08713
Q9VR62	Q9VR62_DROME	PP2C	GM14138p	39100000	49700000	56200000	57700000	51200000	53600000	47600000	48200000	46400000	42400000	51800000	46700000		51250000	4.71833e+07	0.92065
Q9VY91	Q9VY91_DROME	Pdcd4	LD21074p	52100000	54200000	53600000	45600000	50400000	51100000	44000000	39900000	48100000	53500000	45300000	43000000		5.11667e+07	4.56333e+07	0.891857
A1ZBM2	A1ZBM2_DROME	Tbcb	Tubulin-binding cofactor B	56700000	52800000	51000000	49700000	48500000	47800000	46400000	50600000	45800000	47000000	46200000	48900000		5.10833e+07	4.74833e+07	0.929527
Q9V9U7	Q9V9U7_DROME	Tbca	Tubulin-specific chaperone A	59400000	51300000	50200000	49300000	44200000	51800000	54700000	53400000	52200000	53800000	51300000	47800000		5.10333e+07	52200000	1.02286
Q8I941	Q8I941_DROME	CG2159	GH16843p	54500000	54400000	50500000	51300000	50700000	44700000	57400000	60200000	56100000	52600000	57900000	58500000		5.10167e+07	5.71167e+07	1.11957
Q0KI25	Q0KI25_DROME	Dmel\CG4467	Uncharacterized protein, isoform B	49600000	51000000	52900000	52400000	51400000	48600000	53500000	57800000	54600000	53300000	55300000	58800000		5.09833e+07	55550000	1.08957
Q9VI56	Q9VI56_DROME	Dmel\CG1943	GEO05313p1	42300000	51700000	49000000	46400000	57100000	59400000	64500000	53200000	69200000	78400000	81500000	65400000		5.09833e+07	68700000	1.3475
E1JHH0;A8DZ00;Q8IP76	A8DZ00_DROME;E1JHH0_DROME;Q8IP76_DROME	CG6043;CG6108	Uncharacterized protein, isoform F	50700000	47000000	49700000	52400000	53600000	52300000	56700000	48600000	53300000	60200000	55600000	58900000		50950000	55550000	1.09028
Q9VY93	MTNB_DROME	CG11134	Probable methylthioribulose-1-phosphate dehydratase	51000000	46800000	58500000	47500000	54800000	47000000	41200000	51500000	47900000	47400000	47800000	43400000		5.09333e+07	4.65333e+07	0.913613
Q9VMB3	Q9VMB3_DROME	BcDNA:LD22339	Uncharacterized protein, isoform A	47000000	54900000	47900000	57300000	48000000	50400000	59600000	56300000	64000000	64400000	58600000	58400000		5.09167e+07	6.02167e+07	1.18265
A0A0B4K774;A0A0B4KH51;Q9Y0S9	A0A0B4K774_DROME;A0A0B4KH51_DROME;Q9Y0S9_DROME	Abi	Abelson interacting protein, isoform D	54100000	42200000	55600000	48700000	60000000	44200000	45800000	51900000	45000000	46500000	50200000	44200000		50800000	4.72667e+07	0.930446
Q9VHC3	Q9VHC3_DROME	by	Blistery, isoform A	53000000	46100000	50600000	55600000	51000000	48400000	44000000	44000000	43800000	41400000	46000000	46300000		5.07833e+07	44250000	0.871349
Q7K0S5	Q7K0S5_DROME	Gint3	GDI interacting protein 3, isoform B	52900000	49800000	50400000	51200000	51600000	48700000	45200000	50600000	49900000	46200000	48400000	50900000		5.07667e+07	4.85333e+07	0.956008
Q9U5L1	SRPRA_DROME	SrpRalpha	Signal recognition particle receptor subunit alpha homolog	51100000	48200000	48500000	55700000	53500000	47400000	44800000	50600000	45500000	47100000	49800000	45900000		5.07333e+07	4.72833e+07	0.931997
Q9TVM2	XPO1_DROME	emb	Exportin-1	46500000	53900000	49000000	52400000	51500000	50900000	50700000	51600000	52100000	56500000	55200000	54600000		50700000	53450000	1.05424
O76994	O76994_DROME	Ip259	Ribosome biogenesis protein NSA2 homolog	45000000	32600000	48000000	67800000	53700000	56800000	46300000	43100000	42600000	42900000	37600000	42200000		50650000	42450000	0.838105
Q9W253	Q9W253_DROME	mRpS29	Small ribosomal subunit protein mS29	47300000	53600000	48900000	49600000	49600000	54900000	49300000	46900000	51200000	54100000	48600000	45500000		50650000	4.92667e+07	0.972688
Q9VU45	Q9VU45_DROME	Syx13	LD27581p	54100000	44100000	51800000	50500000	52400000	50900000	46700000	54100000	48100000	50100000	54300000	54000000		5.06333e+07	5.12167e+07	1.01152
E1JIE5;Q9VS49	E1JIE5_DROME;Q9VS49_DROME	wrm1	Wurmchen 1, isoform B	39600000	64400000	56000000	59200000	32400000	52100000	90900000	49600000	88900000	85100000	75100000	88100000		5.06167e+07	7.96167e+07	1.57293
A8JR25	A8JR25_DROME	Fas1	Fasciclin 1, isoform D	35500000	62500000	59100000	38200000	47400000	61000000	87000000	58100000	107000000	101000000	90400000	74800000		5.06167e+07	8.63833e+07	1.70662
Q9VYG8	Q9VYG8_DROME	Dmel\CG15717	CG15717-PA	51000000	46800000	54100000	49100000	45500000	56300000	43200000	50300000	47500000	43100000	44400000	37700000		5.04667e+07	4.43667e+07	0.879128
Q9VD64	Q9VD64_DROME	dnd	Dead end	43100000	54100000	50800000	47900000	54500000	52200000	50600000	48900000	47700000	52200000	50100000	51300000		5.04333e+07	5.01333e+07	0.994052
Q9W3C4	Q9W3C4_DROME	Hexo2	beta-N-acetylhexosaminidase	47500000	53300000	49300000	51700000	50300000	50400000	41100000	40700000	44600000	47100000	48400000	46100000		5.04167e+07	4.46667e+07	0.88595
Q9I7K3	Q9I7K3_DROME	Dmel\CG6465	N-acyl-aliphatic-L-amino acid amidohydrolase	47500000	52900000	61000000	54400000	49000000	37600000	57400000	48700000	45200000	35000000	50300000	55100000		50400000	4.86167e+07	0.964616
Q9VAS7	INX3_DROME	Inx3	Innexin inx3	58800000	51100000	50400000	54000000	44500000	43300000	39700000	47700000	38800000	38600000	39600000	38400000		50350000	4.04667e+07	0.803707
Q9VJ11	Q9VJ11_DROME	anon-37B-2	Calcium load-activated calcium channel	50100000	52500000	49200000	48300000	49800000	51200000	46800000	44600000	59300000	52800000	52900000	54700000		5.01833e+07	51850000	1.03321
[truncated: 4,483 more rows]

## Sheet: Male
Protein.Group	Protein.Names	Genes	First.Protein.Description	8%_male_1	8%_male_2	8%_male_3	8%_male_4	8%_male_5	8%_male_6	1%_male_1	1%_male_2	1%_male_3	1%_male_4	1%_male_5	1%_male_6		8%_average	1%_average	1%/8%
[truncated: 6,487 more rows]
